# Supplementary material
Source: Royal Society of Chemistry journal article supplement (doi:10.1039/d5ta09732k)
Supplement: d5ta09732k2.xlsx [file d5ta09732k2.xlsx]

## Sheet: IV
750 °C		800 °C		850 °C
Current Density	Voltage	Current Density	Voltage	Current Density	Voltage
0.787	1.799	1.302	1.8	2.057	1.801
0.7825	1.794	1.2955	1.795	2.0465	1.796
0.7775	1.789	1.2875	1.79	2.035	1.791
0.772	1.784	1.2795	1.785	2.0235	1.786
0.767	1.779	1.2715	1.78	2.0115	1.781
0.762	1.774	1.2635	1.775	1.9995	1.776
0.7565	1.769	1.255	1.77	1.987	1.771
0.7515	1.764	1.247	1.765	1.9745	1.766
0.7465	1.759	1.239	1.76	1.962	1.761
0.741	1.754	1.231	1.755	1.9495	1.756
0.736	1.75	1.2225	1.75	1.937	1.751
0.731	1.744	1.2145	1.745	1.9245	1.746
0.726	1.739	1.206	1.74	1.912	1.741
0.7205	1.734	1.198	1.735	1.899	1.736
0.7155	1.729	1.19	1.73	1.8865	1.731
0.7105	1.724	1.182	1.725	1.874	1.726
0.7055	1.719	1.174	1.72	1.8615	1.721
0.7	1.714	1.1655	1.715	1.849	1.716
0.695	1.709	1.1575	1.71	1.8365	1.711
0.69	1.704	1.1495	1.705	1.824	1.706
0.685	1.7	1.1415	1.7	1.8115	1.701
0.68	1.695	1.1335	1.695	1.799	1.696
0.675	1.689	1.1255	1.69	1.7865	1.691
0.67	1.684	1.1175	1.685	1.774	1.686
0.665	1.68	1.1095	1.68	1.7615	1.681
0.66	1.675	1.1015	1.675	1.7495	1.676
0.6555	1.67	1.0935	1.67	1.737	1.671
0.6505	1.664	1.086	1.665	1.725	1.666
0.6455	1.659	1.078	1.66	1.7125	1.661
0.6405	1.655	1.07	1.655	1.7005	1.656
0.636	1.65	1.062	1.65	1.6885	1.651
0.631	1.645	1.054	1.645	1.676	1.646
0.626	1.64	1.0465	1.64	1.664	1.641
0.6215	1.635	1.0385	1.635	1.652	1.636
0.6165	1.63	1.031	1.63	1.64	1.631
0.6115	1.625	1.023	1.625	1.628	1.626
0.607	1.62	1.0155	1.62	1.616	1.621
0.602	1.615	1.0075	1.615	1.604	1.616
0.5975	1.61	1	1.61	1.592	1.611
0.5925	1.605	0.992	1.605	1.58	1.606
0.588	1.6	0.9845	1.6	1.568	1.601
0.5835	1.595	0.977	1.595	1.5565	1.596
0.5785	1.59	0.9695	1.59	1.5445	1.591
0.574	1.585	0.962	1.585	1.533	1.586
0.569	1.58	0.9545	1.58	1.521	1.581
0.5645	1.575	0.947	1.575	1.509	1.576
0.56	1.57	0.9395	1.57	1.4975	1.571
0.555	1.565	0.9315	1.565	1.486	1.566
0.5505	1.56	0.924	1.56	1.4745	1.561
0.546	1.555	0.9165	1.555	1.463	1.556
0.5415	1.55	0.909	1.55	1.4515	1.551
0.537	1.545	0.902	1.545	1.4395	1.546
0.532	1.54	0.8945	1.54	1.428	1.541
0.5275	1.535	0.887	1.535	1.417	1.536
0.523	1.53	0.8795	1.53	1.4055	1.531
0.5185	1.525	0.8725	1.525	1.394	1.526
0.514	1.52	0.865	1.52	1.3825	1.521
0.5095	1.515	0.8575	1.515	1.3715	1.516
0.505	1.51	0.8505	1.51	1.36	1.511
0.5005	1.505	0.843	1.505	1.349	1.506
0.4961	1.5	0.836	1.5	1.3375	1.501
0.49165	1.495	0.8285	1.495	1.326	1.496
0.4872	1.49	0.8215	1.49	1.315	1.491
0.48275	1.485	0.814	1.485	1.304	1.486
0.47835	1.48	0.807	1.48	1.293	1.481
0.47395	1.475	0.8	1.475	1.282	1.476
0.46955	1.47	0.793	1.47	1.271	1.471
0.46515	1.465	0.7855	1.465	1.26	1.466
0.4608	1.46	0.7785	1.46	1.249	1.461
0.4564	1.455	0.7715	1.455	1.238	1.456
0.4521	1.45	0.7645	1.45	1.227	1.451
0.4477	1.445	0.7575	1.445	1.216	1.446
0.4434	1.44	0.7505	1.44	1.2055	1.441
0.4391	1.435	0.7435	1.435	1.1945	1.436
0.4348	1.43	0.7365	1.43	1.184	1.431
0.43055	1.425	0.7295	1.425	1.173	1.426
0.4263	1.42	0.7225	1.42	1.162	1.421
0.42205	1.415	0.7155	1.415	1.1515	1.416
0.41785	1.41	0.7085	1.41	1.141	1.411
0.4136	1.405	0.702	1.405	1.1305	1.406
0.4094	1.4	0.695	1.4	1.12	1.401
0.40515	1.395	0.688	1.395	1.1095	1.396
0.40095	1.39	0.6815	1.39	1.0985	1.391
0.3968	1.385	0.6745	1.385	1.088	1.386
0.3926	1.38	0.668	1.38	1.078	1.381
0.38845	1.375	0.661	1.375	1.0675	1.376
0.3843	1.37	0.6545	1.37	1.057	1.371
0.3802	1.365	0.6475	1.365	1.0465	1.366
0.37605	1.36	0.641	1.36	1.0365	1.361
0.372	1.355	0.6345	1.355	1.0265	1.356
0.3679	1.35	0.6275	1.35	1.016	1.351
0.36385	1.345	0.621	1.345	1.006	1.346
0.3598	1.34	0.6145	1.34	0.996	1.341
0.35575	1.335	0.608	1.335	0.986	1.336
0.3517	1.33	0.6015	1.33	0.976	1.331
0.3477	1.325	0.595	1.325	0.966	1.326
0.34375	1.32	0.5885	1.32	0.956	1.321
0.33975	1.315	0.582	1.315	0.946	1.316
0.33575	1.31	0.5755	1.31	0.936	1.311
0.3318	1.305	0.569	1.305	0.926	1.306
0.3278	1.3	0.5625	1.3	0.916	1.301
0.3239	1.295	0.556	1.295	0.906	1.296
0.31995	1.29	0.5495	1.29	0.896	1.291
0.3161	1.285	0.543	1.285	0.8865	1.286
0.3122	1.28	0.537	1.28	0.8765	1.281
0.30835	1.275	0.5305	1.275	0.8665	1.276
0.3045	1.27	0.5245	1.27	0.857	1.271
0.30065	1.265	0.518	1.265	0.8475	1.266
0.29685	1.26	0.512	1.26	0.8375	1.261
0.29305	1.255	0.5055	1.255	0.828	1.256
0.2892	1.25	0.49935	1.25	0.8185	1.251
0.2854	1.245	0.49315	1.245	0.809	1.246
0.28165	1.24	0.487	1.24	0.7995	1.241
0.2779	1.235	0.4809	1.235	0.79	1.236
0.27415	1.23	0.47475	1.23	0.7805	1.231
0.2704	1.225	0.46865	1.225	0.771	1.226
0.2667	1.22	0.4626	1.22	0.7615	1.221
0.263	1.215	0.45655	1.215	0.752	1.216
0.25935	1.21	0.4505	1.21	0.743	1.211
0.2557	1.205	0.44445	1.205	0.7335	1.206
0.25205	1.2	0.43845	1.2	0.724	1.201
0.24845	1.195	0.4325	1.195	0.715	1.196
0.2448	1.19	0.4265	1.19	0.7055	1.191
0.24125	1.185	0.4206	1.185	0.6965	1.186
0.23765	1.18	0.4147	1.18	0.6875	1.181
0.23405	1.175	0.4089	1.175	0.678	1.176
0.2305	1.17	0.40305	1.17	0.669	1.171
0.227	1.165	0.39725	1.165	0.66	1.166
0.22345	1.16	0.39145	1.16	0.651	1.161
0.21995	1.155	0.3857	1.155	0.642	1.156
0.2165	1.15	0.37995	1.15	0.633	1.151
0.21305	1.145	0.37425	1.145	0.624	1.146
0.2096	1.14	0.3686	1.14	0.615	1.141
0.2062	1.135	0.36295	1.135	0.606	1.136
0.2028	1.13	0.3573	1.13	0.5975	1.131
0.19945	1.125	0.3517	1.125	0.5885	1.126
0.19605	1.12	0.34615	1.12	0.5795	1.121
0.1927	1.115	0.34065	1.115	0.571	1.116
0.18935	1.11	0.33515	1.11	0.562	1.111
0.18595	1.105	0.3296	1.105	0.5535	1.106
0.1827	1.1	0.3241	1.1	0.545	1.101
0.17945	1.095	0.31865	1.095	0.536	1.096
0.1762	1.09	0.3133	1.09	0.5275	1.091
0.173	1.085	0.3079	1.085	0.519	1.086
0.1698	1.08	0.3026	1.08	0.5105	1.081
0.1666	1.075	0.29725	1.075	0.502	1.076
0.1634	1.07	0.29195	1.07	0.49375	1.071
0.16025	1.065	0.2867	1.065	0.4853	1.066
0.1571	1.06	0.28145	1.06	0.477	1.061
0.15395	1.055	0.2762	1.055	0.46865	1.056
0.15085	1.05	0.27105	1.05	0.4604	1.051
0.14775	1.045	0.2659	1.045	0.4522	1.046
0.14475	1.04	0.2608	1.04	0.4441	1.041
0.14175	1.035	0.25575	1.035	0.436	1.036
0.1388	1.03	0.2507	1.03	0.42795	1.031
0.13585	1.025	0.24565	1.025	0.42	1.026
0.1329	1.02	0.2407	1.02	0.4121	1.021
0.12995	1.015	0.2358	1.015	0.4042	1.016
0.127	1.01	0.2309	1.01	0.3964	1.011
0.1241	1.005	0.226	1.005	0.3885	1.006
0.1212	0.9997	0.22115	0.9999	0.38075	1.001
0.11835	0.9947	0.2164	0.9949	0.37305	0.9956
0.11555	0.9897	0.21165	0.9899	0.36545	0.9906
0.11275	0.9848	0.2071	0.9849	0.3579	0.9856
0.11005	0.9798	0.20265	0.9799	0.35035	0.9807
0.10735	0.9748	0.19815	0.9749	0.3428	0.9757
0.10465	0.9698	0.19355	0.9699	0.3353	0.9707
0.102	0.9648	0.18895	0.9649	0.32785	0.9657
0.09935	0.9597	0.18455	0.9599	0.3204	0.9606
0.0967	0.9548	0.18025	0.9549	0.31305	0.9557
0.0941	0.9498	0.1757	0.9499	0.3057	0.9507
0.0915	0.9448	0.17125	0.9448	0.2984	0.9456
0.08895	0.9398	0.1671	0.9399	0.2912	0.9406
0.0864	0.9348	0.1628	0.9349	0.28405	0.9356
0.08395	0.9298	0.15835	0.9299	0.2769	0.9307
0.08155	0.9248	0.15425	0.9249	0.26985	0.9257
0.07915	0.9198	0.15015	0.9199	0.26285	0.9206
0.0768	0.9148	0.1458	0.9149	0.25595	0.9157
0.07445	0.9097	0.1418	0.9098	0.2491	0.9106
0.07215	0.9048	0.13785	0.9049	0.24245	0.9056
0.0699	0.8998	0.13365	0.8999	0.2359	0.9007
0.06765	0.8948	0.1298	0.8949	0.22935	0.8956
0.0654	0.8898	0.126	0.8899	0.2229	0.8906
0.0632	0.8848	0.12195	0.8849	0.2166	0.8856
0.06105	0.8798	0.1182	0.8799	0.2103	0.8807
0.05895	0.8748	0.1146	0.8749	0.2041	0.8757
0.0569	0.8698	0.1107	0.8699	0.19785	0.8706
0.05485	0.8648	0.10715	0.8649	0.19165	0.8657
0.0528	0.8598	0.1036	0.8599	0.18545	0.8606
0.05085	0.8548	0.0999	0.8549	0.1794	0.8556
0.04893	0.8499	0.0965	0.8499	0.1734	0.8506
0.04704	0.8448	0.09315	0.8449	0.16745	0.8456
0.0452	0.8398	0.08955	0.8399	0.1616	0.8406
0.0434	0.8348	0.0864	0.8349	0.1558	0.8357
0.04164	0.8298	0.0832	0.8299	0.15015	0.8306
0.03992	0.8248	0.0798	0.8249	0.14465	0.8257
0.03824	0.8199	0.07685	0.8199	0.1393	0.8207
0.03659	0.8148	0.0738	0.8149	0.1341	0.8157
0.03499	0.8099	0.0706	0.8099	0.1291	0.8107
0.03343	0.8049	0.06785	0.8049	0.12415	0.8057
0.03188	0.7998	0.06495	0.8	0.11925	0.8007
0.03037	0.7948	0.062	0.7949	0.11435	0.7957
0.02889	0.7899	0.05945	0.7899	0.1095	0.7907
0.02747	0.7848	0.0567	0.7849	0.1047	0.7857
0.02612	0.7799	0.05395	0.7799	0.1	0.7807
0.02483	0.7749	0.0516	0.775	0.0953	0.7757
0.0236	0.7699	0.04909	0.77	0.09075	0.7707
0.02241	0.7648	0.04653	0.7649	0.0864	0.7656
0.02126	0.7598	0.04441	0.76	0.0823	0.7606
0.02014	0.7549	0.04208	0.755	0.0784	0.7557
0.01903	0.7499	0.03977	0.75	0.07465	0.7507
0.01794	0.7449	0.03786	0.745	0.071	0.7457
0.0169	0.7399	0.0357	0.74	0.06735	0.7407
0.01591	0.7349	0.03363	0.735	0.06375	0.7357
0.01501	0.7299	0.03192	0.73	0.0602	0.7307
0.01415	0.7249	0.02995	0.725	0.0567	0.7257
0.01334	0.7199	0.02812	0.72	0.0533	0.7207
0.01254	0.7148	0.02658	0.7149	0.04998	0.7156
0.01175	0.7099	0.02479	0.7099	0.04693	0.7106
0.01096	0.7049	0.02319	0.705	0.0441	0.7057
0.0102	0.6999	0.02186	0.7	0.04148	0.7007
0.00951	0.6949	0.02026	0.695	0.03902	0.6957
0.0089	0.6899	0.01886	0.6899	0.03662	0.6906
0.00833	0.6849	0.01771	0.685	0.03419	0.6857
0.00778	0.6799	0.0163	0.68	0.0318	0.6807
0.00718	0.6749	0.01508	0.675	0.02945	0.6757
0.00661	0.6699	0.01411	0.67	0.02717	0.6707
0.00606	0.6649	0.01289	0.6649	0.02501	0.6656
0.00561	0.6599	0.01181	0.66	0.02308	0.6606
0.00523	0.6549	0.01101	0.655	0.02138	0.6557
0.00484	0.6499	0.00999	0.65	0.01983	0.6507
0.00442	0.6449	0.00904	0.645	0.01839	0.6457
0.004	0.6399	0.00839	0.64	0.01697	0.6406
0.00362	0.6349	0.00757	0.635	0.01554	0.6357
0.00332	0.63	0.00673	0.63	0.01411	0.6307
0.00307	0.6249	0.00621	0.625	0.01272	0.6257
0.00282	0.6199	0.00559	0.62	0.01138	0.6207
0.00253	0.6149	0.00485	0.615	0.01018	0.6156
0.00223	0.6099	0.00441	0.61	0.00918	0.6106
0.002	0.6049	0.00399	0.605	0.00841	0.6056
0.00183	0.5999	0.00337	0.6	0.00771	0.6007
0.00169	0.5949	0.00297	0.595	0.00692	0.5957
0.00151	0.5899	0.00269	0.59	0.00609	0.5907
0.0013	0.5849	0.00219	0.585	0.00526	0.5857
0.00112	0.5799	0.00184	0.58	0.00446	0.5807
0.00101	0.5749	0.00167	0.575	0.00372	0.5757
0.000925	0.5699	0.0013	0.57	0.00316	0.5706
0.0008335	0.5649	0.000975	0.565	0.00278	0.5656
0.000697	0.5599	0.00087	0.56	0.00246	0.5606
0.0005615	0.5549	0.0006155	0.555	0.00208	0.5557
0.00048525	0.5499	0.0003242	0.55	0.00167	0.5507
0.0004494	0.5449	0.0002533	0.545	0.00124	0.5457
0.00041805	0.54	0.00012035	0.54	0.0007875	0.5407
0.00034945	0.5349	-0.00013735	0.535	0.00034925	0.5356
0.00026125	0.5299	-0.0002132	0.53	-2.2995e-06	0.5307
0.00020025	0.525	-0.0002516	0.525	-0.0001927	0.5257
0.00018645	0.5199	-0.00046365	0.52	-0.00029735	0.5206
0.0001903	0.5149	-0.0005415	0.515	-0.0004016	0.5156
0.00018535	0.5099	-0.000528	0.51	-0.0005605	0.5106
0.000154	0.5049	-0.000669	0.505	-0.0008125	0.5056
0.0001104	0.4999	-0.000775	0.5	-0.00108	0.5007
8.17e-05	0.4949	-0.0007355	0.495	-0.00132	0.4957
8.83e-05	0.49	-0.000791	0.49	-0.00148	0.4907
0.0001166	0.4849	-0.0009125	0.485	-0.00154	0.4857
0.00014025	0.4799	-0.000885	0.48	-0.00151	0.4807
0.0001337	0.4749	-0.0008715	0.475	-0.00149	0.4757
0.00010975	0.4699	-0.000979	0.47	-0.00158	0.4707
0.00010185	0.4649	-0.000987	0.465	-0.00173	0.4657
0.0001268	0.4599	-0.000926	0.46	-0.00188	0.4606
0.00016425	0.4549	-0.0009795	0.455	-0.00201	0.4557
0.00018985	0.45	-0.00104	0.4501	-0.00208	0.4507
0.0001826	0.445	-0.000967	0.4451	-0.00205	0.4457
0.00017325	0.44	-0.000964	0.4401	-0.00196	0.4407
0.00018785	0.4349	-0.00104	0.435	-0.0019	0.4357
0.0002252	0.43	-0.0009975	0.43	-0.00193	0.4307
0.00026165	0.4249	-0.0009405	0.425	-0.00201	0.4257
0.00026845	0.42	-0.000987	0.42	-0.00212	0.4207
0.00026295	0.4149	-0.001	0.415	-0.0022	0.4157
0.0002693	0.4099	-0.000928	0.41	-0.00223	0.4106
0.00030505	0.405	-0.0009195	0.4051	-0.00215	0.4057
0.00034105	0.4	-0.0009725	0.4001	-0.00204	0.4007
0.0003543	0.395	-0.00093	0.3951	-0.00196	0.3957
0.00035195	0.39	-0.0008675	0.3901	-0.00198	0.3907
0.0003521	0.385	-0.0009055	0.385	-0.00206	0.3858
0.000375	0.38	-0.0009085	0.3801	-0.00214	0.3807
0.00040935	0.375	-0.0008365	0.3751	-0.00219	0.3757
0.0004321	0.37	-0.000811	0.3701	-0.00215	0.3707
0.0004348	0.3649	-0.0008535	0.3651	-0.00202	0.3657
0.00042875	0.36	-0.0008325	0.3601	-0.00191	0.3607
0.00043455	0.355	-0.0007625	0.3551	-0.00189	0.3557
0.00045845	0.35	-0.000765	0.3501	-0.00195	0.3507
0.000486	0.345	-0.000796	0.3451	-0.00203	0.3457
0.0004949	0.34	-0.000745	0.3401	-0.00208	0.3407
0.0004825	0.3351	-0.0006975	0.3351	-0.00204	0.3357
0.00047485	0.33	-0.0007205	0.3301	-0.0019	0.3307
0.0004845	0.325	-0.0007345	0.3251	-0.00181	0.3257
0.000504	0.32	-0.0006775	0.3201	-0.00179	0.3207
0.0005115	0.315	-0.0006535	0.3151	-0.00184	0.3157
0.0004984	0.31	-0.000693	0.3101	-0.00189	0.3107
0.00047875	0.305	-0.0006765	0.3051	-0.00193	0.3057
0.00046685	0.3	-0.0006235	0.3001	-0.00195	0.3007
0.0004681	0.295	-0.0006375	0.2951	-0.00194	0.2957
0.00047105	0.29	-0.000671	0.2901	-0.00189	0.2907
0.0004647	0.2851	-0.000636	0.2851	-0.00183	0.2857
0.0004422	0.28	-0.0006135	0.2801	-0.00176	0.2806
0.00040915	0.275	-0.000652	0.2751	-0.00171	0.2757
0.00037965	0.27	-0.0006825	0.2701	-0.00176	0.2707
0.0003623	0.265	-0.0006585	0.2651	-0.00184	0.2657
0.00034995	0.26	-0.000653	0.2601	-0.00193	0.2607
0.00032955	0.255	-0.000719	0.2551	-0.00197	0.2557
0.000295	0.25	-0.0007415	0.2501	-0.00195	0.2507
0.0002489	0.2451	-0.00073	0.2451	-0.00189	0.2457
0.000201	0.2401	-0.0007785	0.2402	-0.00189	0.2407
0.00016355	0.2351	-0.000854	0.2352	-0.00198	0.2358
0.00013195	0.23	-0.000879	0.2301	-0.00211	0.2306
9.565e-05	0.225	-0.0009045	0.2251	-0.00224	0.2257
3.986e-05	0.22	-0.000998	0.2201	-0.00234	0.2207
-2.618e-05	0.215	-0.00108	0.2151	-0.00237	0.2157
-9.31e-05	0.2101	-0.00112	0.2101	-0.0024	0.2107
-0.00015555	0.205	-0.00119	0.2051	-0.00254	0.2056
-0.0002166	0.2001	-0.00131	0.2001	-0.00272	0.2007

## Sheet: 1.5 V EIS
750 °C		800 °C		850 °C
Z'	-Z"	Z'	-Z"	Z'	-Z"
1.072	-1.2322	0.6878	-1.243	0.4624	-1.2488
1.0718	-0.9758	0.683	-0.988	0.4396	-1.0088
1.0934	-0.7874	0.682	-0.791	0.4542	-0.7924
1.0642	-0.6172	0.6806	-0.6254	0.4502	-0.63
1.0654	-0.4902	0.676	-0.4976	0.4534	-0.5172
1.0642	-0.3886	0.675	-0.3952	0.4448	-0.3984
1.0636	-0.3092	0.6752	-0.3146	0.4448	-0.3164
1.062	-0.245	0.6734	-0.25	0.4434	-0.2522
1.0612	-0.19366	0.672	-0.19754	0.4436	-0.2004
1.0626	-0.151	0.6718	-0.15748	0.4424	-0.1599
1.0614	-0.12044	0.6714	-0.12342	0.4426	-0.12606
1.0612	-0.09428	0.6726	-0.09816	0.442	-0.1
1.0612	-0.0731	0.6708	-0.07716	0.4422	-0.07882
1.0618	-0.0564	0.6704	-0.06078	0.4418	-0.06242
1.0626	-0.04268	0.6718	-0.047	0.4416	-0.04894
1.0638	-0.0323	0.6724	-0.03574	0.4418	-0.03812
1.0646	-0.02334	0.6726	-0.02752	0.4416	-0.02994
1.0662	-0.01654	0.674	-0.02038	0.442	-0.02288
1.0668	-0.01078	0.6722	-0.01611	0.4428	-0.01682
1.068	-0.00567	0.6732	-0.01041	0.443	-0.01152
1.0698	-0.00185	0.6746	-0.00673	0.4436	-0.00881
1.0698	0.00146	0.6758	-0.00343	0.4444	-0.00594
1.072	0.00399	0.6768	-0.00108	0.445	-0.00359
1.073	0.00666	0.6778	0.00129	0.446	-0.00127
1.0748	0.00964	0.6796	0.00318	0.4464	-4.006e-05
1.077	0.0108	0.6802	0.00444	0.4476	0.00144
1.0778	0.01346	0.681	0.00657	0.4482	0.00272
1.0812	0.01529	0.683	0.00682	0.4492	0.00366
1.083	0.0173	0.6844	0.009	0.45	0.00472
1.086	0.01907	0.686	0.00987	0.451	0.00498
1.089	0.01966	0.688	0.0106	0.4526	0.00596
1.093	0.02196	0.6892	0.01113	0.4534	0.00616
1.096	0.0229	0.691	0.01099	0.454	0.00664
1.1004	0.02272	0.6932	0.01252	0.4554	0.00739
1.1048	0.02474	0.6956	0.01277	0.4572	0.0081
1.1088	0.02472	0.6972	0.01297	0.4584	0.00815
1.111	0.02608	0.6994	0.0148	0.4596	0.0091
1.1166	0.02498	0.702	0.01402	0.4618	0.00864
1.1228	0.02484	0.705	0.01426	0.463	0.00871
1.1252	0.02466	0.7068	0.01345	0.465	0.00806
1.1298	0.02386	0.7096	0.0129	0.4664	0.00765
1.1346	0.0222	0.7118	0.01248	0.4676	0.00712
1.137	0.02094	0.7138	0.01101	0.4686	0.00635
1.1408	0.01982	0.7168	0.00996	0.469	0.00607
1.1446	0.01643	0.7168	0.0085	0.47	0.00523
1.1462	0.01481	0.7184	0.00727	0.471	0.00461
1.1476	0.01286	0.7188	0.00567	0.471	0.00388
1.1492	0.01065	0.7188	0.00579	0.472	0.00364
1.151	0.00946	0.7192	0.00416	0.4726	0.00314
1.1504	0.00873	0.7198	0.00317	0.473	0.00271
1.152	0.00697	0.7198	0.00316	0.4732	0.00202
1.1506	0.00511	0.7216	0.00315	0.4732	0.00172
1.1532	0.00567	0.7212	0.0019	0.4738	0.00172
1.153	0.0045	0.7214	0.00109	0.4738	0.00117
1.1532	0.00561	0.7206	-0.0007486	0.4736	4.666e-05
1.1552	0.00255	0.7216	9.53e-05	0.4744	-0.0002692
1.1556	0.00272	0.7222	-0.0002146	0.4744	0.0002654
1.1562	0.00103	0.7218	-0.00104	0.4744	-0.0004948
1.1564	0.00015606	0.7218	-0.00185	0.4744	-0.00113
1.1562	-0.00114	0.7214	-0.00278	0.4742	-0.00187
1.1562	-0.00273	0.7212	-0.00377	0.4742	-0.00261
1.1564	-0.0039	0.7206	-0.00481	0.4738	-0.0036
1.156	-0.00533	0.7206	-0.00591	0.4734	-0.00466
1.1558	-0.00729	0.7206	-0.00744	0.4724	-0.00575
1.1546	-0.00849	0.7196	-0.0086	0.4712	-0.00689
1.1536	-0.00982	0.718	-0.00971	0.471	-0.00785
1.1514	-0.0111	0.7158	-0.01059	0.47	-0.00887
1.1488	-0.0117	0.7136	-0.0111	0.4682	-0.00937
1.1456	-0.01217	0.7112	-0.0116	0.4662	-0.00946
1.1438	-0.0123	0.709	-0.01122	0.464	-0.00912
1.141	-0.01175	0.7068	-0.01068	0.4622	-0.00883
