# Supplementary material
Source: Royal Society of Chemistry journal article supplement (doi:10.1039/d5ta09732k)
Supplement: d5ta09732k3.xlsx [file d5ta09732k3.xlsx]

## Sheet: IV
750 °C		800 °C		850 °C
Current Density	Voltage	Current Density	Voltage	Current Density	Voltage
0.771	1.799	1.265	1.8	1.9719	1.798
0.7665	1.794	1.258	1.795	1.9614	1.793
0.762	1.79	1.25	1.79	1.9509	1.787
0.7575	1.784	1.243	1.785	1.93935	1.783
0.7525	1.779	1.2355	1.78	1.9278	1.778
0.748	1.775	1.2275	1.775	1.91625	1.773
0.7435	1.77	1.2195	1.77	1.90418	1.768
0.739	1.764	1.2125	1.765	1.89263	1.763
0.7335	1.759	1.205	1.76	1.88108	1.758
0.729	1.755	1.1965	1.755	1.869	1.753
0.7245	1.75	1.1895	1.75	1.85745	1.748
0.72	1.744	1.182	1.745	1.8459	1.743
0.715	1.74	1.174	1.74	1.83383	1.738
0.7105	1.734	1.1665	1.735	1.82175	1.732
0.706	1.73	1.159	1.73	1.81073	1.728
0.701	1.724	1.151	1.725	1.79865	1.723
0.6965	1.72	1.1435	1.72	1.7871	1.718
0.692	1.714	1.136	1.715	1.77555	1.713
0.6875	1.71	1.129	1.71	1.76348	1.708
0.6825	1.705	1.121	1.705	1.75193	1.703
0.678	1.7	1.1135	1.7	1.7409	1.698
0.6735	1.695	1.1065	1.695	1.72883	1.693
0.669	1.69	1.0985	1.69	1.71728	1.688
0.664	1.684	1.0905	1.685	1.70625	1.683
0.6595	1.68	1.0835	1.68	1.69418	1.678
0.655	1.674	1.0765	1.675	1.68315	1.673
0.6505	1.67	1.0685	1.67	1.67213	1.668
0.646	1.664	1.061	1.665	1.66005	1.663
0.6415	1.66	1.054	1.66	1.64903	1.658
0.637	1.655	1.0465	1.655	1.638	1.653
0.632	1.65	1.039	1.65	1.62593	1.648
0.6275	1.645	1.032	1.645	1.61543	1.643
0.6235	1.64	1.0245	1.64	1.6044	1.638
0.619	1.635	1.017	1.635	1.59233	1.633
0.614	1.63	1.0095	1.63	1.58183	1.628
0.61	1.625	1.003	1.625	1.5708	1.623
0.6055	1.62	0.9955	1.62	1.55873	1.618
0.601	1.615	0.988	1.615	1.54823	1.613
0.5965	1.61	0.981	1.61	1.53773	1.608
0.592	1.605	0.974	1.605	1.52565	1.603
0.5875	1.6	0.9665	1.6	1.51463	1.598
0.583	1.595	0.9595	1.595	1.50465	1.593
0.5785	1.59	0.9525	1.59	1.4931	1.588
0.5745	1.585	0.945	1.585	1.48208	1.583
0.57	1.58	0.938	1.58	1.47158	1.578
0.5655	1.575	0.931	1.575	1.46055	1.573
0.561	1.57	0.924	1.57	1.449	1.568
0.557	1.565	0.917	1.565	1.43903	1.563
0.5525	1.56	0.91	1.56	1.428	1.558
0.548	1.555	0.903	1.555	1.41698	1.553
0.544	1.55	0.896	1.55	1.40648	1.548
0.5395	1.545	0.889	1.545	1.39598	1.543
0.535	1.54	0.882	1.54	1.38443	1.538
0.531	1.535	0.875	1.535	1.37445	1.533
0.5265	1.53	0.868	1.53	1.36395	1.528
0.5225	1.525	0.861	1.525	1.35293	1.523
0.518	1.52	0.854	1.52	1.34243	1.518
0.514	1.515	0.8475	1.515	1.33245	1.513
0.5095	1.51	0.8405	1.51	1.3209	1.508
0.5055	1.505	0.8335	1.505	1.3104	1.503
0.501	1.5	0.827	1.5	1.30095	1.498
0.4969	1.495	0.82	1.495	1.28993	1.493
0.4927	1.49	0.8135	1.49	1.2789	1.488
0.48845	1.485	0.8065	1.485	1.26945	1.483
0.4843	1.48	0.7995	1.48	1.25895	1.478
0.48015	1.475	0.793	1.475	1.24793	1.473
0.476	1.47	0.7865	1.47	1.23848	1.468
0.4718	1.465	0.7795	1.465	1.22798	1.463
0.46765	1.46	0.773	1.46	1.21695	1.458
0.4636	1.455	0.7665	1.455	1.2075	1.453
0.4595	1.45	0.7595	1.45	1.19753	1.448
0.45525	1.445	0.753	1.445	1.1865	1.443
0.4512	1.44	0.7465	1.44	1.17653	1.438
0.44715	1.435	0.74	1.435	1.16708	1.433
0.443	1.43	0.733	1.43	1.15605	1.428
0.43895	1.425	0.7265	1.425	1.14608	1.423
0.43495	1.42	0.7205	1.42	1.13715	1.418
0.4309	1.415	0.7135	1.415	1.12613	1.413
0.4268	1.41	0.707	1.41	1.11615	1.408
0.4228	1.405	0.701	1.405	1.1067	1.403
0.4189	1.4	0.6945	1.4	1.09673	1.398
0.4148	1.395	0.6875	1.395	1.08623	1.393
0.4107	1.39	0.6815	1.39	1.07678	1.388
0.40685	1.385	0.675	1.385	1.06733	1.383
0.40295	1.38	0.6685	1.38	1.05683	1.378
0.39875	1.375	0.662	1.375	1.04738	1.373
0.39495	1.37	0.656	1.37	1.03793	1.368
0.3911	1.365	0.6495	1.365	1.02743	1.363
0.3871	1.36	0.643	1.36	1.01798	1.358
0.38305	1.355	0.637	1.355	1.00905	1.353
0.3793	1.35	0.6305	1.35	0.99855	1.348
0.37545	1.345	0.624	1.345	0.98858	1.343
0.37135	1.34	0.618	1.34	0.97965	1.338
0.36755	1.335	0.612	1.335	0.96968	1.333
0.3638	1.33	0.6055	1.33	0.9597	1.328
0.35985	1.325	0.599	1.325	0.95078	1.323
0.35585	1.32	0.5935	1.32	0.94133	1.318
0.35225	1.315	0.587	1.315	0.93135	1.313
0.3485	1.31	0.5805	1.31	0.9219	1.308
0.34455	1.305	0.575	1.305	0.91298	1.303
0.3406	1.3	0.5685	1.3	0.903	1.298
0.33705	1.295	0.562	1.295	0.89355	1.293
0.3332	1.29	0.5565	1.29	0.88515	1.288
0.3293	1.285	0.5505	1.285	0.87465	1.283
0.32575	1.28	0.544	1.28	0.86573	1.278
0.3221	1.275	0.538	1.275	0.8568	1.273
0.3181	1.27	0.5325	1.27	0.84683	1.268
0.31445	1.265	0.5265	1.265	0.8379	1.263
0.311	1.26	0.52	1.26	0.8295	1.258
0.30715	1.255	0.5145	1.255	0.81953	1.253
0.30325	1.25	0.509	1.25	0.81008	1.248
0.2999	1.245	0.5025	1.245	0.80168	1.243
0.29615	1.24	0.49635	1.24	0.79223	1.238
0.29225	1.235	0.4905	1.235	0.78278	1.233
0.28875	1.23	0.48535	1.23	0.77438	1.228
0.2854	1.225	0.479	1.225	0.76545	1.223
0.2817	1.22	0.4729	1.22	0.75548	1.218
0.2778	1.215	0.46785	1.215	0.74708	1.213
0.2746	1.21	0.46195	1.21	0.73868	1.208
0.271	1.205	0.4555	1.205	0.7287	1.203
0.26715	1.2	0.4505	1.2	0.7203	1.198
0.2637	1.195	0.4448	1.195	0.7119	1.193
0.2605	1.19	0.4383	1.19	0.70245	1.188
0.25665	1.185	0.43325	1.185	0.69353	1.183
0.25305	1.18	0.4278	1.18	0.68565	1.178
0.2499	1.175	0.42145	1.175	0.6762	1.173
0.24655	1.17	0.41625	1.17	0.66728	1.168
0.24265	1.165	0.41115	1.165	0.6594	1.163
0.23925	1.16	0.4046	1.16	0.64995	1.158
0.2362	1.155	0.3992	1.155	0.64103	1.153
0.23255	1.15	0.3945	1.15	0.63368	1.148
0.22885	1.145	0.38845	1.145	0.62423	1.143
0.22585	1.14	0.38245	1.14	0.6153	1.138
0.22265	1.135	0.37775	1.135	0.60743	1.133
0.21885	1.13	0.37265	1.13	0.59903	1.128
0.2154	1.125	0.3662	1.125	0.58958	1.123
0.21235	1.12	0.3609	1.12	0.58223	1.118
0.2093	1.115	0.3563	1.115	0.57383	1.113
0.20555	1.11	0.35065	1.11	0.56438	1.108
0.20215	1.105	0.34455	1.105	0.5565	1.103
0.1995	1.1	0.34005	1.1	0.54915	1.098
0.19605	1.095	0.33505	1.095	0.5397	1.093
0.1924	1.09	0.3295	1.09	0.53183	1.088
0.18975	1.085	0.32345	1.085	0.52427	1.083
0.18645	1.08	0.3188	1.08	0.51513	1.078
0.18275	1.075	0.31415	1.075	0.50715	1.073
0.17995	1.07	0.3079	1.07	0.49985	1.068
0.17715	1.065	0.30335	1.065	0.49072	1.063
0.1733	1.06	0.29895	1.06	0.48305	1.058
0.17035	1.055	0.2926	1.055	0.47576	1.053
0.16765	1.05	0.2876	1.05	0.46673	1.048
0.1643	1.045	0.2836	1.045	0.45875	1.043
0.16095	1.04	0.27755	1.04	0.45171	1.038
0.15815	1.035	0.2726	1.035	0.44373	1.033
0.15555	1.03	0.2686	1.03	0.43502	1.028
0.15215	1.025	0.26305	1.025	0.42798	1.023
0.14885	1.02	0.2576	1.02	0.42042	1.018
0.1464	1.015	0.25395	1.015	0.41165	1.013
0.1436	1.01	0.2483	1.01	0.40457	1.008
0.14005	1.005	0.2432	1.005	0.39753	1.003
0.13735	0.9997	0.2395	0.9998	0.38882	0.9981
0.1349	0.9947	0.23425	0.9949	0.38152	0.9931
0.1316	0.9897	0.2288	0.9899	0.3748	0.9881
0.1285	0.9848	0.22455	0.9849	0.36635	0.9832
0.12615	0.9798	0.22075	0.9799	0.3591	0.9782
0.12355	0.9748	0.2156	0.9749	0.35243	0.9732
0.12025	0.9698	0.2101	0.9699	0.34398	0.9682
0.1174	0.9648	0.2062	0.9649	0.33721	0.9631
0.11515	0.9598	0.2024	0.9599	0.33044	0.9582
0.11255	0.9548	0.1971	0.9549	0.32219	0.9532
0.1093	0.9498	0.1921	0.9499	0.31547	0.9482
0.1066	0.9447	0.1887	0.9448	0.30886	0.9432
0.1044	0.9397	0.18445	0.9399	0.30077	0.9382
0.1018	0.9348	0.17905	0.9349	0.29411	0.9332
0.09875	0.9298	0.17535	0.9299	0.28786	0.9282
0.0962	0.9248	0.17165	0.9249	0.27988	0.9232
0.0942	0.9198	0.1664	0.9199	0.27332	0.9182
0.0915	0.9148	0.16205	0.9149	0.26723	0.9132
0.0886	0.9097	0.1588	0.9098	0.25956	0.9082
0.08645	0.9048	0.1544	0.9049	0.25279	0.9032
0.0844	0.8998	0.14955	0.8998	0.24707	0.8982
0.08145	0.8947	0.1464	0.8949	0.23987	0.8932
0.079	0.8898	0.14285	0.8899	0.23294	0.8882
0.07725	0.8848	0.13785	0.8849	0.22738	0.8832
0.0749	0.8798	0.1342	0.8799	0.22024	0.8782
0.07205	0.8748	0.13105	0.8749	0.21389	0.8733
0.07	0.8698	0.12635	0.8699	0.20843	0.8683
0.0682	0.8648	0.12235	0.8649	0.20113	0.8632
0.0659	0.8598	0.11975	0.8599	0.19525	0.8582
0.0633	0.8548	0.11625	0.8549	0.18989	0.8533
0.06125	0.8498	0.1114	0.8499	0.18296	0.8483
0.0597	0.8448	0.1082	0.8448	0.17714	0.8432
0.05735	0.8398	0.10555	0.8399	0.1721	0.8382
0.05505	0.8348	0.1012	0.8349	0.16559	0.8333
0.0533	0.8298	0.0975	0.8299	0.15981	0.8283
0.05185	0.8248	0.09505	0.8249	0.15503	0.8233
0.04947	0.8199	0.0916	0.8199	0.14879	0.8183
0.04745	0.8148	0.0876	0.8149	0.14322	0.8133
0.04621	0.8099	0.0847	0.8099	0.13865	0.8083
0.04401	0.8048	0.0825	0.8049	0.13283	0.8033
0.04202	0.7999	0.07865	0.8	0.12731	0.7983
0.04055	0.7948	0.07515	0.7949	0.12296	0.7933
0.03928	0.7898	0.07305	0.7899	0.11765	0.7883
0.03733	0.7848	0.0705	0.7849	0.1123	0.7833
0.03551	0.7799	0.06665	0.78	0.10826	0.7783
0.0344	0.7749	0.0642	0.775	0.10327	0.7733
0.03298	0.7699	0.06235	0.77	0.09833	0.7683
0.03114	0.7648	0.0588	0.7649	0.09455	0.7633
0.02977	0.7598	0.05605	0.7599	0.08972	0.7583
0.02878	0.7549	0.05435	0.7549	0.08521	0.7533
0.02734	0.7499	0.05205	0.7499	0.08169	0.7483
0.02572	0.7449	0.0489	0.745	0.07733	0.7433
0.02466	0.7399	0.04652	0.74	0.07313	0.7383
0.02378	0.7349	0.04476	0.7349	0.06998	0.7333
0.02242	0.7299	0.04306	0.73	0.06594	0.7283
0.02113	0.7249	0.04053	0.725	0.06216	0.7234
0.02028	0.7199	0.03807	0.7199	0.05922	0.7184
0.01943	0.7148	0.03703	0.7149	0.05565	0.7133
0.01837	0.7098	0.0346	0.7099	0.05217	0.7083
0.01712	0.7048	0.03248	0.7049	0.04954	0.7033
0.01653	0.6999	0.0314	0.7	0.04641	0.6983
0.01574	0.6949	0.02995	0.695	0.04331	0.6933
0.01472	0.6898	0.02765	0.6899	0.04101	0.6883
0.014	0.6849	0.02617	0.685	0.03831	0.6834
0.01352	0.6799	0.0253	0.68	0.03557	0.6784
0.0126	0.6749	0.0239	0.675	0.03356	0.6733
0.01193	0.6699	0.02199	0.67	0.0312	0.6684
0.01155	0.6648	0.02094	0.6649	0.02889	0.6634
0.01092	0.6599	0.02016	0.66	0.02715	0.6584
0.0102	0.6549	0.01892	0.655	0.02514	0.6534
0.00987	0.6499	0.01753	0.65	0.02317	0.6484
0.00945	0.6449	0.01662	0.645	0.02171	0.6434
0.00885	0.6399	0.01606	0.6399	0.02011	0.6384
0.00849	0.6349	0.01496	0.635	0.01842	0.6334
0.00827	0.6299	0.01386	0.63	0.01721	0.6284
0.00778	0.6249	0.01355	0.625	0.0159	0.6234
0.0074	0.6199	0.01265	0.62	0.01454	0.6184
0.00727	0.6149	0.01169	0.6149	0.01353	0.6134
0.00692	0.6099	0.01118	0.61	0.01253	0.6084
0.00658	0.6049	0.01083	0.605	0.01143	0.6034
0.00638	0.5999	0.01008	0.6	0.01064	0.5984
0.00627	0.5949	0.00939	0.595	0.00984	0.5934
0.00598	0.5899	0.00921	0.59	0.009	0.5884
0.00576	0.5849	0.00869	0.585	0.00839	0.5834
0.00571	0.5799	0.00807	0.58	0.00779	0.5785
0.00554	0.5749	0.00796	0.575	0.00715	0.5735
0.0053	0.5699	0.00763	0.57	0.00669	0.5685
0.00524	0.5649	0.00705	0.565	0.00626	0.5635
0.00519	0.5599	0.00687	0.56	0.0058	0.5584
0.00505	0.5549	0.00673	0.5549	0.0055	0.5535
0.00488	0.5499	0.00624	0.55	0.00519	0.5485
0.00491	0.5449	0.0061	0.545	0.0049	0.5435
0.00484	0.54	0.00602	0.54	0.00474	0.5385
0.00467	0.5349	0.00575	0.535	0.00454	0.5334
0.00469	0.53	0.00544	0.5301	0.00438	0.5285
0.0047	0.5249	0.00537	0.525	0.00431	0.5235
0.00451	0.5199	0.00534	0.52	0.00421	0.5185
0.00449	0.5149	0.00505	0.515	0.00413	0.5135
0.00457	0.5099	0.00493	0.51	0.00412	0.5085
0.0045	0.5049	0.00499	0.505	0.00406	0.5035
0.00438	0.4999	0.0048	0.5	0.00403	0.4985
0.00445	0.4949	0.00459	0.495	0.00404	0.4935
0.00455	0.4899	0.00467	0.49	0.00403	0.4885
0.00438	0.4849	0.00462	0.485	0.00402	0.4835
0.00438	0.4799	0.00442	0.48	0.00404	0.4785
0.00449	0.4749	0.00442	0.475	0.00404	0.4735
0.00445	0.4699	0.00451	0.47	0.00405	0.4686
0.00435	0.4649	0.00435	0.465	0.00408	0.4636
0.00441	0.4599	0.00422	0.46	0.00408	0.4585
0.00448	0.4549	0.00432	0.455	0.00411	0.4535
0.00451	0.45	0.00436	0.45	0.00413	0.4486
0.00434	0.445	0.00413	0.445	0.00414	0.4435
0.00439	0.44	0.00412	0.4401	0.00415	0.4385
0.0045	0.4349	0.00429	0.435	0.00417	0.4335
0.00433	0.4299	0.00417	0.43	0.00418	0.4285
0.00434	0.4249	0.00405	0.425	0.00419	0.4235
0.00447	0.4199	0.00409	0.42	0.0042	0.4185
0.00442	0.4149	0.00422	0.415	0.00421	0.4135
0.0043	0.4099	0.00413	0.41	0.00421	0.4085
0.00437	0.405	0.00395	0.4051	0.00422	0.4035
0.00448	0.4	0.00416	0.4001	0.00423	0.3985
0.00432	0.395	0.00414	0.3951	0.00423	0.3936
0.0043	0.39	0.00393	0.3901	0.00423	0.3886
0.00445	0.385	0.00403	0.3851	0.00425	0.3836
0.00448	0.38	0.00415	0.3801	0.00424	0.3786
0.00425	0.3749	0.00404	0.375	0.00424	0.3736
0.00435	0.37	0.0039	0.3701	0.00426	0.3686
0.00447	0.365	0.0041	0.3651	0.00425	0.3636
0.00432	0.36	0.00413	0.3601	0.00424	0.3587
0.00426	0.355	0.00397	0.3551	0.00425	0.3536
0.00445	0.35	0.00391	0.3501	0.00424	0.3486
0.00437	0.345	0.0041	0.3451	0.00423	0.3436
0.00424	0.34	0.00396	0.3401	0.00424	0.3386
0.00429	0.335	0.00386	0.3351	0.00422	0.3336
0.0044	0.33	0.00401	0.3301	0.00421	0.3286
0.00426	0.325	0.00407	0.325	0.00422	0.3236
0.00418	0.32	0.00387	0.3201	0.00419	0.3186
0.00432	0.315	0.00386	0.3151	0.00417	0.3137
0.00431	0.31	0.00402	0.3101	0.00418	0.3087
0.00413	0.305	0.00398	0.305	0.00414	0.3036
0.00417	0.3	0.00375	0.3001	0.00412	0.2987
0.00428	0.295	0.00383	0.2951	0.0041	0.2937
0.00411	0.29	0.00396	0.2901	0.00403	0.2887
0.00404	0.285	0.00376	0.2851	0.00401	0.2837
0.00413	0.28	0.00364	0.2801	0.00397	0.2787
0.00414	0.275	0.00373	0.2751	0.00387	0.2737
0.00391	0.27	0.00377	0.2701	0.00383	0.2687
0.00389	0.265	0.00362	0.2651	0.00377	0.2637
0.00396	0.26	0.00345	0.2601	0.00363	0.2587
0.00391	0.255	0.00356	0.2551	0.00354	0.2537
0.0037	0.25	0.00349	0.2501	0.00342	0.2487
0.00366	0.2451	0.00324	0.2451	0.00323	0.2437
0.00367	0.24	0.00327	0.2401	0.0031	0.2387
0.00353	0.2351	0.00327	0.2352	0.0029	0.2337
0.00332	0.23	0.00298	0.2301	0.00263	0.2287
0.00328	0.225	0.00284	0.2251	0.00242	0.2237
0.00322	0.22	0.00282	0.2201	0.00211	0.2187
0.00294	0.215	0.00259	0.2151	0.00173	0.2137
0.00278	0.21	0.00232	0.2101	0.00143	0.2088
0.00266	0.205	0.00211	0.2051	0.0009744	0.2037
0.00245	0.2	0.00195	0.2001	0.00046494	0.1987

## Sheet: 1.5 V EIS
750 °C		800 °C		850 °C
Z'	-Z"	Z'	-Z"	Z'	-Z"
1.0926	-1.1214	0.7152	-1.1356	0.4539	-1.1444
1.0924	-0.8892	0.7092	-0.9024	0.4541	-0.9084
1.0912	-0.7064	0.7076	-0.7176	0.45352	-0.7228
1.0924	-0.561	0.7056	-0.57	0.45048	-0.5756
1.093	-0.4462	0.7044	-0.454	0.44838	-0.4578
1.0898	-0.351	0.7062	-0.3602	0.44781	-0.3616
1.0964	-0.278	0.7052	-0.2854	0.44876	-0.2882
1.0956	-0.219	0.7004	-0.2262	0.44838	-0.23
1.0956	-0.17208	0.7002	-0.17954	0.4461	-0.18254
1.0976	-0.13522	0.7006	-0.14168	0.44705	-0.14482
1.098	-0.10458	0.7034	-0.11078	0.44629	-0.11478
1.0938	-0.07852	0.7046	-0.08704	0.44571	-0.09154
1.093	-0.06058	0.705	-0.06792	0.44724	-0.07028
1.0978	-0.04508	0.7066	-0.053	0.44724	-0.05706
1.1016	-0.03298	0.7046	-0.04034	0.44648	-0.04352
1.1	-0.02312	0.7066	-0.0313	0.44762	-0.034
1.1018	-0.01481	0.7078	-0.0223	0.44857	-0.02584
1.1058	-0.00885	0.7072	-0.01627	0.44857	-0.01947
1.1104	-0.00318	0.7092	-0.01184	0.44895	-0.01295
1.1074	0.0013	0.7132	-0.00614	0.45029	-0.01022
1.112	0.00408	0.716	-0.00531	0.44762	-0.00683
1.1168	0.00656	0.7114	-0.0005248	0.45143	-0.00408
1.1218	0.01021	0.7166	0.00163	0.45124	-0.0004052
1.1204	0.01196	0.7172	0.00317	0.4501	0.0002824
1.1248	0.01331	0.7142	0.0064	0.45086	0.00191
1.1276	0.01585	0.7202	0.00699	0.45333	0.00343
1.1306	0.01885	0.722	0.00837	0.45543	0.00395
1.1292	0.01965	0.719	0.01017	0.45543	0.00585
1.1302	0.02312	0.7212	0.01093	0.45581	0.00673
1.1382	0.0225	0.7236	0.01274	0.456	0.00791
1.1362	0.02682	0.7232	0.01355	0.4581	0.00797
1.1508	0.0262	0.7288	0.01468	0.46171	0.00924
1.1498	0.02916	0.7356	0.01573	0.46057	0.0099
1.1566	0.03052	0.7322	0.01737	0.46514	0.01043
1.1574	0.03208	0.7404	0.01702	0.46476	0.01079
1.165	0.03346	0.7412	0.0178	0.46857	0.01063
1.1722	0.03158	0.7442	0.01858	0.46914	0.01121
1.174	0.03394	0.7462	0.0175	0.4701	0.01062
1.1864	0.0334	0.7496	0.01603	0.47333	0.01053
1.19	0.03166	0.7514	0.0163	0.47581	0.00976
1.1904	0.031	0.7532	0.01566	0.47524	0.00928
1.1962	0.02804	0.7608	0.01406	0.47676	0.00885
1.2006	0.02666	0.7596	0.0131	0.4779	0.00803
1.2036	0.02418	0.7588	0.01277	0.47905	0.00797
1.2074	0.02218	0.762	0.01128	0.48133	0.00657
1.2146	0.0208	0.7644	0.00993	0.48343	0.00598
1.213	0.01923	0.7652	0.00928	0.48305	0.00541
1.2202	0.01767	0.7678	0.0083	0.48476	0.00488
1.2214	0.01564	0.77	0.00749	0.48552	0.00495
1.2222	0.01445	0.7696	0.00777	0.48533	0.00383
1.2258	0.01171	0.772	0.00633	0.48457	0.00481
1.2262	0.01231	0.7714	0.00575	0.4861	0.00312
1.23	0.00806	0.7742	0.00337	0.484	0.00208
1.2298	0.01194	0.7724	0.00692	0.48419	0.00664
1.2318	0.0084	0.7734	0.00284	0.48686	0.00254
1.2322	0.00677	0.7744	0.00255	0.48743	0.0012
1.2344	0.00756	0.775	0.00233	0.48914	0.00191
1.2344	0.0043	0.7754	0.00138	0.48838	0.0006294
1.235	0.00309	0.7756	0.0004496	0.48857	-0.00010724
1.2356	0.00154	0.7758	-0.0005638	0.48876	-0.0008474
1.2358	1.277e-05	0.776	-0.00178	0.48895	-0.00175
1.2356	-0.00184	0.7756	-0.00276	0.48857	-0.00291
1.2352	-0.00334	0.7752	-0.00409	0.48838	-0.00392
1.2344	-0.00523	0.7746	-0.00542	0.48781	-0.00517
1.2346	-0.00782	0.7736	-0.00651	0.48686	-0.00609
1.2314	-0.0081	0.7726	-0.00759	0.4859	-0.00703
1.2298	-0.00946	0.7712	-0.0086	0.48457	-0.00797
1.2276	-0.0101	0.7694	-0.00921	0.48343	-0.00812
1.2262	-0.01067	0.7678	-0.0094	0.4819	-0.00839
1.2248	-0.01068	0.7662	-0.0094	0.48057	-0.00797
1.2234	-0.01054	0.765	-0.00914	0.47943	-0.00788
