# Supplementary material
Source: Royal Society of Chemistry journal article supplement (doi:10.1039/d5ta09732k)
Supplement: d5ta09732k4.xlsx [file d5ta09732k4.xlsx]

## Sheet: Sheet1
							6.969
100mA	CO2	103.651	103.884	103.982
	CO	3.0216	3.0159	3.0371
	CO content	0.0283259	0.0282123	0.0283792
	CO actual	0.62317	0.62067	0.624341
	CO theoretical	0.6969
	faraday efficiency	0.894203	0.890616	0.895884
200mA	CO2	100.369	100.354	100.475	100.411
	CO	6.4117	6.3674	6.3827	6.4265
	CO content	0.0600457	0.0596639	0.059731	0.0601522
	CO actual	1.32101	1.31261	1.31408	1.32335
	CO theoretical	1.3938
	faraday efficiency	0.947773	0.941747	0.942805	0.949454
300mA	CO2	96.882	96.8638	96.8246
	CO	9.6985	9.6745	9.7249
	CO content	0.0909969	0.0908077	0.0912712
	CO actual	2.00193	1.99777	2.00797
	CO theoretical	2.0907
	faraday efficiency	0.957542	0.955551	0.960428
400mA	CO2	93.3068	93.1735	93.225
	CO	13.1232	13.1899	13.15
	CO content	0.123304	0.124008	0.123619
	CO actual	2.71268	2.72817	2.71962
	CO theoretical	2.7876
	faraday efficiency	0.973123	0.978682	0.975615
600mA	CO2	85.8043	86.1047	86.2289
	CO	19.7739	19.8457	19.8545
	CO content	0.187292	0.187311	0.187159
	CO actual	4.12041	4.12085	4.11751
	CO theoretical	4.1814
	faraday efficiency	0.985415	0.985519	0.984719
800mA	CO2	78.9961	79.188	79.2302
	CO	26.5156	26.6084	26.6683
	CO content	0.251305	0.251506	0.251829
	CO actual	5.52871	5.53313	5.54024
	CO theoretical	5.5752
	faraday efficiency	0.991661	0.992453	0.993729
