# Supplementary material
Source: Royal Society of Chemistry journal article supplement (doi:10.1039/d5ta09732k)
Supplement: d5ta09732k5.xlsx [file d5ta09732k5.xlsx]

## Sheet: Sheet1
Time	Voltage
0	1.26892
0.00633	1.2689
0.01266	1.26884
0.01899	1.26874
0.02531	1.26865
0.03164	1.26857
0.03797	1.26833
0.0443	1.26801
0.05063	1.26778
0.05696	1.26764
0.06329	1.26764
0.06962	1.26766
0.07594	1.26773
0.08227	1.26779
0.0886	1.26784
0.09493	1.26791
0.10126	1.26798
0.10759	1.26802
0.11392	1.26807
0.12025	1.26816
0.12657	1.26817
0.1329	1.26814
0.13923	1.26808
0.14556	1.26807
0.15189	1.2681
0.15822	1.26814
0.16455	1.26817
0.17088	1.26822
0.1772	1.26824
0.18353	1.26823
0.18986	1.26822
0.19619	1.26814
0.20252	1.26803
0.20885	1.26797
0.21518	1.26794
0.2215	1.26793
0.22783	1.26792
0.23416	1.26791
0.24049	1.26792
0.24682	1.26792
0.25315	1.26799
0.25948	1.26813
0.26581	1.26833
0.27213	1.26849
0.27846	1.26861
0.28479	1.26871
0.29112	1.26872
0.29745	1.26872
0.30378	1.26873
0.31011	1.26874
0.31644	1.26879
0.32276	1.2688
0.32909	1.26878
0.33542	1.2687
0.34175	1.26862
0.34808	1.2686
0.35441	1.26861
0.36074	1.26872
0.36707	1.26886
0.37339	1.26896
0.37972	1.26906
0.38605	1.26918
0.39238	1.26929
0.39871	1.26938
0.40504	1.26946
0.41137	1.26948
0.4177	1.2695
0.42402	1.26957
0.43035	1.26969
0.43668	1.26989
0.44301	1.27007
0.44934	1.27017
0.45567	1.27018
0.462	1.27019
0.46832	1.27021
0.47465	1.27026
0.48098	1.27032
0.48731	1.27036
0.49364	1.27039
0.49997	1.27038
0.5063	1.27036
0.51263	1.27024
0.51895	1.26997
0.52528	1.26975
0.53161	1.26969
0.53794	1.2697
0.54427	1.26972
0.5506	1.26981
0.55693	1.26988
0.56326	1.26986
0.56958	1.26985
0.57591	1.26984
0.58224	1.26978
0.58857	1.26972
0.5949	1.26966
0.60123	1.26957
0.60756	1.26946
0.61389	1.26935
0.62021	1.26918
0.62654	1.26895
0.63287	1.26881
0.6392	1.26878
0.64553	1.26879
0.65186	1.26882
0.65819	1.26886
0.66451	1.26885
0.67084	1.26882
0.67717	1.26875
0.6835	1.2687
0.68983	1.26868
0.69616	1.26864
0.70249	1.26859
0.70882	1.26854
0.71514	1.26847
0.72147	1.26842
0.7278	1.2683
0.73413	1.26812
0.74046	1.268
0.74679	1.26792
0.75312	1.26793
0.75945	1.26791
0.76577	1.26792
0.7721	1.26789
0.77843	1.26786
0.78476	1.2678
0.79109	1.26771
0.79742	1.2676
0.80375	1.26758
0.81008	1.26759
0.8164	1.26763
0.82273	1.26769
0.82906	1.26769
0.83539	1.26759
0.84172	1.26734
0.84805	1.26709
0.85438	1.26688
0.86071	1.26667
0.86703	1.26645
0.87336	1.26621
0.87969	1.26596
0.88602	1.2657
0.89235	1.26549
0.89868	1.26529
0.90501	1.26507
0.91133	1.26486
0.91766	1.26466
0.92399	1.26454
0.93032	1.26448
0.93665	1.26443
0.94298	1.26432
0.94931	1.26422
0.95564	1.26421
0.96196	1.26421
0.96829	1.26422
0.97462	1.26424
0.98095	1.26434
0.98728	1.26448
0.99361	1.26455
0.99994	1.26465
1.00627	1.26479
1.01259	1.26491
1.01892	1.265
1.02525	1.26509
1.03158	1.26521
1.03791	1.26532
1.04424	1.26545
1.05057	1.26546
1.0569	1.26543
1.06322	1.26541
1.06955	1.26542
1.07588	1.26546
1.08221	1.26557
1.08854	1.26571
1.09487	1.26583
1.1012	1.26593
1.10752	1.26603
1.11385	1.26611
1.12018	1.26617
1.12651	1.2662
1.13284	1.26624
1.13917	1.26628
1.1455	1.26631
1.15183	1.26629
1.15815	1.26627
1.16448	1.2661
1.17081	1.26588
1.17714	1.2658
1.18347	1.26577
1.1898	1.26576
1.19613	1.26573
1.20246	1.26571
1.20878	1.26571
1.21511	1.26575
1.22144	1.26583
1.22777	1.26596
1.2341	1.26608
1.24043	1.26616
1.24676	1.26624
1.25309	1.26627
1.25941	1.26629
1.26574	1.26629
1.27207	1.26629
1.2784	1.26614
1.28473	1.26592
1.29106	1.26586
1.29739	1.26588
1.30371	1.26591
1.31004	1.26605
1.31637	1.26625
1.3227	1.26646
1.32903	1.26661
1.33536	1.26675
1.34169	1.26692
1.34802	1.26708
1.35434	1.26725
1.36067	1.26743
1.367	1.26762
1.37333	1.26781
1.37966	1.268
1.38599	1.26815
1.39232	1.26824
1.39865	1.26827
1.40497	1.26832
1.4113	1.26835
1.41763	1.26835
1.42396	1.26836
1.43029	1.2684
1.43662	1.26843
1.44295	1.26842
1.44928	1.26838
1.4556	1.2683
1.46193	1.26822
1.46826	1.26811
1.47459	1.268
1.48092	1.26789
1.48725	1.26777
1.49358	1.2677
1.49991	1.2676
1.50623	1.26742
1.51256	1.26723
1.51889	1.2671
1.52522	1.26705
1.53155	1.26697
1.53788	1.26688
1.54421	1.26682
1.55053	1.2668
1.55686	1.2668
1.56319	1.26678
1.56952	1.26673
1.57585	1.2667
1.58218	1.26666
1.58851	1.26658
1.59484	1.26652
1.60116	1.26649
1.60749	1.26642
1.61382	1.2663
1.62015	1.26609
1.62648	1.26585
1.63281	1.26569
1.63914	1.26567
1.64547	1.2657
1.65179	1.26578
1.65812	1.26588
1.66445	1.26598
1.67078	1.2661
1.67711	1.26617
1.68344	1.26627
1.68977	1.2664
1.6961	1.26649
1.70242	1.26657
1.70875	1.26666
1.71508	1.26677
1.72141	1.26684
1.72774	1.26683
1.73407	1.26681
1.7404	1.26681
1.74672	1.26683
1.75305	1.26688
1.75938	1.26692
1.76571	1.26698
1.77204	1.267
1.77837	1.26697
1.7847	1.26692
1.79103	1.26688
1.79735	1.26689
1.80368	1.26693
1.81001	1.26708
1.81634	1.26724
1.82267	1.26739
1.829	1.26755
1.83533	1.26771
1.84166	1.26775
1.84798	1.26776
1.85431	1.26778
1.86064	1.26786
1.86697	1.26801
1.8733	1.26819
1.87963	1.26836
1.88596	1.26848
1.89229	1.26848
1.89861	1.26846
1.90494	1.26842
1.91127	1.26839
1.9176	1.26834
1.92393	1.26832
1.93026	1.2683
1.93659	1.26829
1.94292	1.26825
1.94924	1.26819
1.95557	1.26806
1.9619	1.26784
1.96823	1.2676
1.97456	1.26745
1.98089	1.26738
1.98722	1.26736
1.99354	1.26734
1.99987	1.26732
2.0062	1.26732
2.01253	1.26729
2.01886	1.26728
2.02519	1.26721
2.03152	1.26712
2.03785	1.26705
2.04417	1.26699
2.0505	1.26693
2.05683	1.26687
2.06316	1.26678
2.06949	1.26669
2.07582	1.26647
2.08215	1.26615
2.08848	1.26596
2.0948	1.26597
2.10113	1.266
2.10746	1.26609
2.11379	1.26627
2.12012	1.2665
2.12645	1.2667
2.13278	1.26686
2.13911	1.26699
2.14543	1.26712
2.15176	1.26723
2.15809	1.2673
2.16442	1.26737
2.17075	1.26746
2.17708	1.26754
2.18341	1.26753
2.18973	1.26744
2.19606	1.2673
2.20239	1.26723
2.20872	1.26719
2.21505	1.26716
2.22138	1.26711
2.22771	1.26713
2.23404	1.26709
2.24036	1.26709
2.24669	1.26707
2.25302	1.26708
2.25935	1.26711
2.26568	1.26721
2.27201	1.26739
2.27834	1.2676
2.28467	1.26774
2.29099	1.26785
2.29732	1.26785
2.30365	1.26781
2.30998	1.26767
2.31631	1.26754
2.32264	1.2675
2.32897	1.26749
2.3353	1.26748
2.34162	1.26745
2.34795	1.26744
2.35428	1.26741
2.36061	1.26742
2.36694	1.26741
2.37327	1.2674
2.3796	1.2674
2.38592	1.26749
2.39225	1.26768
2.39858	1.26791
2.40491	1.26813
2.41124	1.26832
2.41757	1.26843
2.4239	1.26846
2.43023	1.26847
2.43655	1.26853
2.44288	1.26863
2.44921	1.2687
2.45554	1.26875
2.46187	1.2688
2.4682	1.2689
2.47453	1.26895
2.48086	1.26894
2.48718	1.26895
2.49351	1.26896
2.49984	1.26899
2.50617	1.26905
2.5125	1.26915
2.51883	1.26934
2.52516	1.26959
2.53149	1.26988
2.53781	1.27006
2.54414	1.27012
2.55047	1.27018
2.5568	1.27036
2.56313	1.27054
2.56946	1.2706
2.57579	1.27058
2.58212	1.27057
2.58844	1.27051
2.59477	1.27046
2.6011	1.2704
2.60743	1.27032
2.61376	1.27026
2.62009	1.27022
2.62642	1.2702
2.63274	1.27021
2.63907	1.27024
2.6454	1.27033
2.65173	1.27033
2.65806	1.2703
2.66439	1.27029
2.67072	1.27033
2.67705	1.27045
2.68337	1.27059
2.6897	1.27073
2.69603	1.27081
2.70236	1.27086
2.70869	1.27086
2.71502	1.27088
2.72135	1.27089
2.72768	1.27091
2.734	1.27092
2.74033	1.27091
2.74666	1.27089
2.75299	1.27089
2.75932	1.2709
2.76565	1.2709
2.77198	1.2709
2.77831	1.27086
2.78463	1.27085
2.79096	1.27089
2.79729	1.27099
2.80362	1.27113
2.80995	1.27123
2.81628	1.27135
2.82261	1.27152
2.82893	1.27169
2.83526	1.27184
2.84159	1.27189
2.84792	1.2719
2.85425	1.2719
2.86058	1.27191
2.86691	1.27192
2.87324	1.27196
2.87956	1.27198
2.88589	1.27198
2.89222	1.27193
2.89855	1.27189
2.90488	1.27192
2.91121	1.27197
2.91754	1.27206
2.92387	1.27218
2.93019	1.27233
2.93652	1.2725
2.94285	1.27264
2.94918	1.27271
2.95551	1.27277
2.96184	1.27281
2.96817	1.27283
2.9745	1.27283
2.98082	1.27281
2.98715	1.27273
2.99348	1.2726
2.99981	1.27247
3.00614	1.2723
3.01247	1.27202
3.0188	1.27175
3.02512	1.27162
3.03145	1.2716
3.03778	1.27159
3.04411	1.27159
3.05044	1.27156
3.05677	1.27147
3.0631	1.27136
3.06943	1.27126
3.07575	1.27116
3.08208	1.27108
3.08841	1.27101
3.09474	1.27098
3.10107	1.27097
3.1074	1.27097
3.11373	1.27096
3.12006	1.27096
3.12638	1.27084
3.13271	1.27059
3.13904	1.27046
3.14537	1.27047
3.1517	1.27048
3.15803	1.27051
3.16436	1.27056
3.17069	1.27061
3.17701	1.27065
3.18334	1.27071
3.18967	1.2708
3.196	1.27086
3.20233	1.27087
3.20866	1.27085
3.21499	1.27079
3.22132	1.27066
3.22764	1.27047
3.23397	1.27027
3.2403	1.27006
3.24663	1.26968
3.25296	1.26922
3.25929	1.26887
3.26562	1.26855
3.27194	1.26829
3.27827	1.26805
3.2846	1.26781
3.29093	1.26768
3.29726	1.26764
3.30359	1.26763
3.30992	1.26761
3.31625	1.26755
3.32257	1.26744
3.3289	1.26734
3.33523	1.26725
3.34156	1.2672
3.34789	1.2672
3.35422	1.26719
3.36055	1.26709
3.36688	1.26693
3.3732	1.26691
3.37953	1.26694
3.38586	1.26703
3.39219	1.26718
3.39852	1.26736
3.40485	1.26755
3.41118	1.26776
3.41751	1.268
3.42383	1.26826
3.43016	1.26846
3.43649	1.26859
3.44282	1.26864
3.44915	1.2687
3.45548	1.26873
3.46181	1.26874
3.46813	1.26876
3.47446	1.26876
3.48079	1.2686
3.48712	1.26836
3.49345	1.26823
3.49978	1.26816
3.50611	1.26817
3.51244	1.26819
3.51876	1.26829
3.52509	1.26843
3.53142	1.26864
3.53775	1.26888
3.54408	1.26914
3.55041	1.26947
3.55674	1.26982
3.56307	1.27019
3.56939	1.27057
3.57572	1.27097
3.58205	1.27138
3.58838	1.2718
3.59471	1.2722
3.60104	1.27247
3.60737	1.27273
3.6137	1.27311
3.62002	1.27351
3.62635	1.27384
3.63268	1.27417
3.63901	1.27451
3.64534	1.2748
3.65167	1.27509
3.658	1.27537
3.66433	1.2756
3.67065	1.2758
3.67698	1.27592
3.68331	1.27601
3.68964	1.27608
3.69597	1.27612
3.7023	1.27617
3.70863	1.27624
3.71495	1.27623
3.72128	1.27616
3.72761	1.27607
3.73394	1.27608
3.74027	1.27609
3.7466	1.27619
3.75293	1.27635
3.75926	1.27653
3.76558	1.27667
3.77191	1.27678
3.77824	1.27691
3.78457	1.27703
3.7909	1.27715
3.79723	1.27725
3.80356	1.2773
3.80989	1.2773
3.81621	1.27729
3.82254	1.27724
3.82887	1.27715
3.8352	1.27699
3.84153	1.2767
3.84786	1.27633
3.85419	1.27597
3.86052	1.27558
3.86684	1.27514
3.87317	1.27466
3.8795	1.27416
3.88583	1.27368
3.89216	1.27325
3.89849	1.27291
3.90482	1.27268
3.91114	1.27254
3.91747	1.27241
3.9238	1.2723
3.93013	1.27218
3.93646	1.27205
3.94279	1.27195
3.94912	1.2719
3.95545	1.27181
3.96177	1.27155
3.9681	1.27123
3.97443	1.27104
3.98076	1.27097
3.98709	1.27093
3.99342	1.27092
3.99975	1.27092
4.00608	1.27088
4.0124	1.27082
4.01873	1.27076
4.02506	1.2707
4.03139	1.27065
4.03772	1.27058
4.04405	1.27054
4.05038	1.27056
4.05671	1.27057
4.06303	1.27058
4.06936	1.27057
4.07569	1.27051
4.08202	1.27031
4.08835	1.27004
4.09468	1.26989
4.10101	1.26983
4.10733	1.2698
4.11366	1.26976
4.11999	1.26973
4.12632	1.26971
4.13265	1.26971
4.13898	1.2697
4.14531	1.26969
4.15164	1.26967
4.15796	1.26965
4.16429	1.2696
4.17062	1.26953
4.17695	1.26948
4.18328	1.26944
4.18961	1.26938
4.19594	1.26922
4.20227	1.26896
4.20859	1.26879
4.21492	1.2688
4.22125	1.26882
4.22758	1.26893
4.23391	1.26907
4.24024	1.26918
4.24657	1.26929
4.2529	1.26937
4.25922	1.2694
4.26555	1.2694
4.27188	1.26939
4.27821	1.26937
4.28454	1.26935
4.29087	1.26931
4.2972	1.26926
4.30353	1.26922
4.30985	1.26918
4.31618	1.26905
4.32251	1.2688
4.32884	1.26861
4.33517	1.26853
4.3415	1.26847
4.34783	1.26842
4.35415	1.26835
4.36048	1.26831
4.36681	1.2683
4.37314	1.26831
4.37947	1.26832
4.3858	1.26838
4.39213	1.26845
4.39846	1.26853
4.40478	1.2686
4.41111	1.26867
4.41744	1.26874
4.42377	1.26881
4.4301	1.26881
4.43643	1.26878
4.44276	1.26866
4.44909	1.26854
4.45541	1.26847
4.46174	1.26844
4.46807	1.26843
4.4744	1.26842
4.48073	1.26842
4.48706	1.26845
4.49339	1.2685
4.49972	1.26853
4.50604	1.26855
4.51237	1.26855
4.5187	1.26855
4.52503	1.26854
4.53136	1.26853
4.53769	1.26852
4.54402	1.2685
4.55034	1.26846
4.55667	1.26836
4.563	1.26816
4.56933	1.26805
4.57566	1.26809
4.58199	1.26813
4.58832	1.26825
4.59465	1.26835
4.60097	1.26845
4.6073	1.26853
4.61363	1.26851
4.61996	1.26846
4.62629	1.26837
4.63262	1.26828
4.63895	1.26816
4.64528	1.26804
4.6516	1.26793
4.65793	1.26781
4.66426	1.26768
4.67059	1.26755
4.67692	1.26735
4.68325	1.26708
4.68958	1.26694
4.69591	1.26699
4.70223	1.26703
4.70856	1.26715
4.71489	1.26733
4.72122	1.26748
4.72755	1.26761
4.73388	1.26776
4.74021	1.26793
4.74654	1.26815
4.75286	1.26839
4.75919	1.26854
4.76552	1.26864
4.77185	1.26867
4.77818	1.26868
4.78451	1.26868
4.79084	1.26867
4.79716	1.26863
4.80349	1.26845
4.80982	1.26828
4.81615	1.26826
4.82248	1.26827
4.82881	1.26831
4.83514	1.26839
4.84147	1.26847
4.84779	1.26854
4.85412	1.26862
4.86045	1.26874
4.86678	1.26884
4.87311	1.26895
4.87944	1.26907
4.88577	1.26923
4.8921	1.2694
4.89842	1.26954
4.90475	1.26964
4.91108	1.26969
4.91741	1.26969
4.92374	1.26959
4.93007	1.26946
4.9364	1.26949
4.94273	1.26951
4.94905	1.26964
4.95538	1.2698
4.96171	1.26994
4.96804	1.27008
4.97437	1.27025
4.9807	1.2704
4.98703	1.27052
4.99335	1.27063
4.99968	1.27069
5.00601	1.27073
5.01234	1.27073
5.01867	1.27072
5.025	1.27068
5.03133	1.27062
5.03766	1.27053
5.04398	1.27034
5.05031	1.27011
5.05664	1.26998
5.06297	1.2699
5.0693	1.2699
5.07563	1.2699
5.08196	1.2699
5.08829	1.26994
5.09461	1.27
5.10094	1.27009
5.10727	1.27019
5.1136	1.27023
5.11993	1.27024
5.12626	1.27023
5.13259	1.27022
5.13892	1.27022
5.14524	1.27023
5.15157	1.27023
5.1579	1.27021
5.16423	1.27007
5.17056	1.26989
5.17689	1.2698
5.18322	1.26982
5.18954	1.26983
5.19587	1.26988
5.2022	1.26993
5.20853	1.26999
5.21486	1.27003
5.22119	1.27009
5.22752	1.27015
5.23385	1.27019
5.24017	1.27028
5.2465	1.27038
5.25283	1.27053
5.25916	1.27072
5.26549	1.27088
5.27182	1.27102
5.27815	1.27102
5.28448	1.2709
5.2908	1.27073
5.29713	1.27065
5.30346	1.27058
5.30979	1.27057
5.31612	1.27056
5.32245	1.27061
5.32878	1.27081
5.33511	1.27106
5.34143	1.27126
5.34776	1.27137
5.35409	1.2714
5.36042	1.27139
5.36675	1.27138
5.37308	1.27137
5.37941	1.27137
5.38574	1.27139
5.39206	1.27145
5.39839	1.27146
5.40472	1.2714
5.41105	1.27135
5.41738	1.27136
5.42371	1.27142
5.43004	1.27156
5.43636	1.27171
5.44269	1.27196
5.44902	1.27222
5.45535	1.27243
5.46168	1.27261
5.46801	1.27274
5.47434	1.27285
5.48067	1.27291
5.48699	1.27295
5.49332	1.27299
5.49965	1.27302
5.50598	1.27305
5.51231	1.27311
5.51864	1.27311
5.52497	1.27303
5.5313	1.27283
5.53762	1.27258
5.54395	1.27242
5.55028	1.27233
5.55661	1.27226
5.56294	1.27221
5.56927	1.27219
5.5756	1.27215
5.58193	1.27212
5.58825	1.2721
5.59458	1.27211
5.60091	1.27213
5.60724	1.27219
5.61357	1.27227
5.6199	1.27239
5.62623	1.27253
5.63255	1.27266
5.63888	1.27271
5.64521	1.27269
5.65154	1.27257
5.65787	1.27239
5.6642	1.27227
5.67053	1.27216
5.67686	1.27207
5.68318	1.27198
5.68951	1.27187
5.69584	1.27175
5.70217	1.2716
5.7085	1.27145
5.71483	1.27138
5.72116	1.27137
5.72749	1.27139
5.73381	1.27145
5.74014	1.27154
5.74647	1.27164
5.7528	1.27178
5.75913	1.27196
5.76546	1.27208
5.77179	1.27215
5.77812	1.27226
5.78444	1.27245
5.79077	1.2726
5.7971	1.27268
5.80343	1.2727
5.80976	1.27269
5.81609	1.27263
5.82242	1.2726
5.82875	1.27262
5.83507	1.27263
5.8414	1.27265
5.84773	1.27265
5.85406	1.27265
5.86039	1.27261
5.86672	1.27256
5.87305	1.27251
5.87937	1.27246
5.8857	1.27236
5.89203	1.27209
5.89836	1.27186
5.90469	1.27181
5.91102	1.27183
5.91735	1.27186
5.92368	1.27194
5.93	1.272
5.93633	1.27203
5.94266	1.27204
5.94899	1.27205
5.95532	1.27205
5.96165	1.27203
5.96798	1.27202
5.97431	1.27204
5.98063	1.2721
5.98696	1.27221
5.99329	1.27235
5.99962	1.27249
6.00595	1.27252
6.01228	1.27249
6.01861	1.27249
6.02494	1.27251
6.03126	1.27259
6.03759	1.27269
6.04392	1.27281
6.05025	1.27292
6.05658	1.27298
6.06291	1.27303
6.06924	1.27305
6.07556	1.27305
6.08189	1.27304
6.08822	1.273
6.09455	1.27291
6.10088	1.2728
6.10721	1.27268
6.11354	1.27258
6.11987	1.2725
6.12619	1.27245
6.13252	1.27229
6.13885	1.27208
6.14518	1.27204
6.15151	1.27207
6.15784	1.27213
6.16417	1.27221
6.1705	1.27225
6.17682	1.27229
6.18315	1.27242
6.18948	1.27256
6.19581	1.27264
6.20214	1.27268
6.20847	1.2727
6.2148	1.27271
6.22113	1.27273
6.22745	1.27275
6.23378	1.27279
6.24011	1.27284
6.24644	1.27284
6.25277	1.27276
6.2591	1.2726
6.26543	1.27249
6.27175	1.27246
6.27808	1.27242
6.28441	1.27235
6.29074	1.27226
6.29707	1.27217
6.3034	1.27205
6.30973	1.27196
6.31606	1.27196
6.32238	1.27196
6.32871	1.27197
6.33504	1.27198
6.34137	1.272
6.3477	1.27205
6.35403	1.27215
6.36036	1.27226
6.36669	1.27238
6.37301	1.2724
6.37934	1.27237
6.38567	1.27233
6.392	1.27234
6.39833	1.27237
6.40466	1.2724
6.41099	1.27242
6.41732	1.27241
6.42364	1.27242
6.42997	1.27241
6.4363	1.27239
6.44263	1.27234
6.44896	1.27227
6.45529	1.27225
6.46162	1.27225
6.46795	1.27225
6.47427	1.27223
6.4806	1.27222
6.48693	1.27222
6.49326	1.27222
6.49959	1.27212
6.50592	1.27199
6.51225	1.27197
6.51857	1.27198
6.5249	1.27197
6.53123	1.27194
6.53756	1.27192
6.54389	1.27192
6.55022	1.27192
6.55655	1.2719
6.56288	1.27187
6.5692	1.27186
6.57553	1.27186
6.58186	1.27185
6.58819	1.27185
6.59452	1.27185
6.60085	1.27183
6.60718	1.27182
6.61351	1.2718
6.61983	1.27168
6.62616	1.27155
6.63249	1.27155
6.63882	1.27156
6.64515	1.27158
6.65148	1.27166
6.65781	1.27177
6.66414	1.27188
6.67046	1.27201
6.67679	1.2721
6.68312	1.2722
6.68945	1.27232
6.69578	1.27241
6.70211	1.27249
6.70844	1.27256
6.71476	1.2726
6.72109	1.27262
6.72742	1.27261
6.73375	1.27261
6.74008	1.2725
6.74641	1.27226
6.75274	1.27202
6.75907	1.27187
6.76539	1.2718
6.77172	1.2718
6.77805	1.27181
6.78438	1.27182
6.79071	1.27182
6.79704	1.27182
6.80337	1.27181
6.8097	1.27183
6.81602	1.27184
6.82235	1.27185
6.82868	1.27184
6.83501	1.27184
6.84134	1.27184
6.84767	1.27184
6.854	1.27184
6.86033	1.27184
6.86665	1.27175
6.87298	1.27163
6.87931	1.2716
6.88564	1.27161
6.89197	1.27162
6.8983	1.27169
6.90463	1.27179
6.91096	1.27185
6.91728	1.2719
6.92361	1.27194
6.92994	1.27203
6.93627	1.27209
6.9426	1.27215
6.94893	1.27222
6.95526	1.2723
6.96158	1.27239
6.96791	1.27248
6.97424	1.27259
6.98057	1.27266
6.9869	1.27266
6.99323	1.27267
6.99956	1.27269
7.00589	1.27276
7.01221	1.2729
7.01854	1.27307
7.02487	1.27318
7.0312	1.27322
7.03753	1.27326
7.04386	1.27329
7.05019	1.27332
7.05652	1.27334
7.06284	1.27334
7.06917	1.27335
7.0755	1.27335
7.08183	1.27335
7.08816	1.27337
7.09449	1.27342
7.10082	1.2735
7.10715	1.27351
7.11347	1.2735
7.1198	1.2735
7.12613	1.27353
7.13246	1.27365
7.13879	1.2738
7.14512	1.27389
7.15145	1.27396
7.15777	1.27403
7.1641	1.2741
7.17043	1.27418
7.17676	1.27425
7.18309	1.27431
7.18942	1.27434
7.19575	1.27434
7.20208	1.27433
7.2084	1.27432
7.21473	1.27433
7.22106	1.27433
7.22739	1.27432
7.23372	1.27429
7.24005	1.27412
7.24638	1.27395
7.25271	1.27394
7.25903	1.27395
7.26536	1.27396
7.27169	1.27397
7.27802	1.27398
7.28435	1.27398
7.29068	1.27397
7.29701	1.27397
7.30334	1.27397
7.30966	1.27397
7.31599	1.27398
7.32232	1.27406
7.32865	1.27424
7.33498	1.27447
7.34131	1.2747
7.34764	1.27491
7.35396	1.27504
7.36029	1.27509
7.36662	1.27511
7.37295	1.27522
7.37928	1.27543
7.38561	1.27567
7.39194	1.27594
7.39827	1.27622
7.40459	1.2765
7.41092	1.27678
7.41725	1.27705
7.42358	1.27731
7.42991	1.27756
7.43624	1.27778
7.44257	1.27801
7.4489	1.27822
7.45522	1.27838
7.46155	1.2785
7.46788	1.27859
7.47421	1.27858
7.48054	1.27855
7.48687	1.27841
7.4932	1.27826
7.49953	1.2782
7.50585	1.2782
7.51218	1.27821
7.51851	1.27826
7.52484	1.27834
7.53117	1.27845
7.5375	1.27862
7.54383	1.27881
7.55016	1.27897
7.55648	1.27913
7.56281	1.27925
7.56914	1.2793
7.57547	1.27928
7.5818	1.27924
7.58813	1.27915
7.59446	1.27906
7.60078	1.27896
7.60711	1.27873
7.61344	1.27839
7.61977	1.27811
7.6261	1.27796
7.63243	1.27789
7.63876	1.27784
7.64509	1.27778
7.65141	1.27768
7.65774	1.2776
7.66407	1.27753
7.6704	1.27741
7.67673	1.27725
7.68306	1.27705
7.68939	1.27678
7.69572	1.27643
7.70204	1.27604
7.70837	1.27566
7.7147	1.27533
7.72103	1.27505
7.72736	1.27475
7.73369	1.27439
7.74002	1.27408
7.74635	1.27395
7.75267	1.27395
7.759	1.27396
7.76533	1.27402
7.77166	1.27416
7.77799	1.27429
7.78432	1.27446
7.79065	1.27466
7.79697	1.27482
7.8033	1.27496
7.80963	1.27502
7.81596	1.27501
7.82229	1.275
7.82862	1.27491
7.83495	1.27475
7.84128	1.27454
7.8476	1.27429
7.85393	1.27393
7.86026	1.27356
7.86659	1.27325
7.87292	1.27299
7.87925	1.27273
7.88558	1.27252
7.89191	1.27238
7.89823	1.27227
7.90456	1.27216
7.91089	1.27204
7.91722	1.27194
7.92355	1.2719
7.92988	1.27188
7.93621	1.27187
7.94254	1.27186
7.94886	1.27186
7.95519	1.27186
7.96152	1.27187
7.96785	1.27187
7.97418	1.27188
7.98051	1.27189
7.98684	1.27189
7.99316	1.27188
7.99949	1.27188
8.00582	1.27188
8.01215	1.2719
8.01848	1.27196
8.02481	1.27207
8.03114	1.2722
8.03747	1.27236
8.04379	1.27256
8.05012	1.2728
8.05645	1.27304
8.06278	1.27324
8.06911	1.27337
8.07544	1.27345
8.08177	1.27353
8.0881	1.27354
8.09442	1.27346
8.10075	1.27332
8.10708	1.2732
8.11341	1.27309
8.11974	1.27304
8.12607	1.27304
8.1324	1.27305
8.13873	1.27304
8.14505	1.27304
8.15138	1.27304
8.15771	1.273
8.16404	1.27293
8.17037	1.27286
8.1767	1.27275
8.18303	1.27267
8.18936	1.27266
8.19568	1.27266
8.20201	1.27266
8.20834	1.27266
8.21467	1.27265
8.221	1.27263
8.22733	1.2726
8.23366	1.27259
8.23998	1.27254
8.24631	1.27246
8.25264	1.27238
8.25897	1.27231
8.2653	1.27224
8.27163	1.2722
8.27796	1.2722
8.28429	1.27222
8.29061	1.27228
8.29694	1.27238
8.30327	1.2725
8.3096	1.27263
8.31593	1.27278
8.32226	1.27294
8.32859	1.2731
8.33492	1.27325
8.34124	1.27338
8.34757	1.27349
8.3539	1.27352
8.36023	1.27351
8.36656	1.27349
8.37289	1.27333
8.37922	1.27311
8.38555	1.27297
8.39187	1.27291
8.3982	1.27285
8.40453	1.27282
8.41086	1.27275
8.41719	1.27267
8.42352	1.27256
8.42985	1.27245
8.43617	1.27236
8.4425	1.27229
8.44883	1.27223
8.45516	1.27217
8.46149	1.27213
8.46782	1.27212
8.47415	1.27212
8.48048	1.27212
8.4868	1.27215
8.49313	1.27219
8.49946	1.27222
8.50579	1.27226
8.51212	1.27225
8.51845	1.27225
8.52478	1.27224
8.53111	1.27222
8.53743	1.27217
8.54376	1.27213
8.55009	1.27206
8.55642	1.27199
8.56275	1.27192
8.56908	1.27184
8.57541	1.27176
8.58174	1.27167
8.58806	1.27159
8.59439	1.27155
8.60072	1.27157
8.60705	1.2716
8.61338	1.2717
8.61971	1.27186
8.62604	1.27204
8.63237	1.27222
8.63869	1.27236
8.64502	1.27239
8.65135	1.27241
8.65768	1.27246
8.66401	1.27261
8.67034	1.27277
8.67667	1.27288
8.68299	1.27291
8.68932	1.27289
8.69565	1.27288
8.70198	1.27286
8.70831	1.27282
8.71464	1.27274
8.72097	1.27262
8.7273	1.27246
8.73362	1.27226
8.73995	1.27207
8.74628	1.27187
8.75261	1.27168
8.75894	1.27153
8.76527	1.27145
8.7716	1.27144
8.77793	1.27146
8.78425	1.27152
8.79058	1.27164
8.79691	1.27178
8.80324	1.27192
8.80957	1.27205
8.8159	1.2722
8.82223	1.27237
8.82856	1.27252
8.83488	1.27265
8.84121	1.27274
8.84754	1.27276
8.85387	1.27277
8.8602	1.27276
8.86653	1.27276
8.87286	1.27279
8.87918	1.27285
8.88551	1.27294
8.89184	1.27302
8.89817	1.27303
8.9045	1.27302
8.91083	1.27298
8.91716	1.27291
8.92349	1.27277
8.92981	1.27256
8.93614	1.27238
8.94247	1.27232
8.9488	1.27234
8.95513	1.27247
8.96146	1.27277
8.96779	1.2731
8.97412	1.27344
8.98044	1.27373
8.98677	1.27399
8.9931	1.27426
8.99943	1.27457
9.00576	1.27493
9.01209	1.27532
9.01842	1.27571
9.02475	1.27608
9.03107	1.27635
9.0374	1.27651
9.04373	1.27658
9.05006	1.27656
9.05639	1.27653
9.06272	1.27641
9.06905	1.27623
9.07537	1.27603
9.0817	1.27583
9.08803	1.27562
9.09436	1.2754
9.10069	1.27515
9.10702	1.27487
9.11335	1.27457
9.11968	1.27431
9.126	1.27411
9.13233	1.27398
9.13866	1.27386
9.14499	1.27373
9.15132	1.27362
9.15765	1.27359
9.16398	1.27361
9.17031	1.27365
9.17663	1.27371
9.18296	1.27379
9.18929	1.27386
9.19562	1.27391
9.20195	1.27397
9.20828	1.27397
9.21461	1.27384
9.22094	1.2736
9.22726	1.27343
9.23359	1.27339
9.23992	1.27339
9.24625	1.27337
9.25258	1.27332
9.25891	1.27322
9.26524	1.27311
9.27157	1.27302
9.27789	1.27291
9.28422	1.27283
9.29055	1.27284
9.29688	1.27287
9.30321	1.27309
9.30954	1.27352
9.31587	1.27407
9.32219	1.27474
9.32852	1.27542
9.33485	1.27605
9.34118	1.27657
9.34751	1.27694
9.35384	1.27716
9.36017	1.27727
9.3665	1.27734
9.37282	1.27734
9.37915	1.27733
9.38548	1.27727
9.39181	1.27716
9.39814	1.277
9.40447	1.27681
9.4108	1.27662
9.41713	1.27643
9.42345	1.27627
9.42978	1.27613
9.43611	1.27599
9.44244	1.27585
9.44877	1.27569
9.4551	1.27543
9.46143	1.27513
9.46776	1.27498
9.47408	1.27496
9.48041	1.27497
9.48674	1.27497
9.49307	1.27498
9.4994	1.27501
9.50573	1.27506
9.51206	1.27512
9.51838	1.27518
9.52471	1.27528
9.53104	1.27541
9.53737	1.27552
9.5437	1.27565
9.55003	1.27577
9.55636	1.27583
9.56269	1.27586
9.56901	1.27587
9.57534	1.27587
9.58167	1.27585
9.588	1.27579
9.59433	1.27568
9.60066	1.27559
9.60699	1.27553
9.61332	1.27548
9.61964	1.27544
9.62597	1.27544
9.6323	1.27545
9.63863	1.27548
9.64496	1.27557
9.65129	1.27568
9.65762	1.27579
9.66395	1.27591
9.67027	1.27603
9.6766	1.27618
9.68293	1.27636
9.68926	1.2766
9.69559	1.2769
9.70192	1.27714
9.70825	1.27734
9.71458	1.27764
9.7209	1.27802
9.72723	1.27844
9.73356	1.27884
9.73989	1.27922
9.74622	1.27956
9.75255	1.27988
9.75888	1.28015
9.7652	1.28038
9.77153	1.28059
9.77786	1.28081
9.78419	1.281
9.79052	1.28117
9.79685	1.28133
9.80318	1.28143
9.80951	1.2815
9.81583	1.28156
9.82216	1.2816
9.82849	1.28165
9.83482	1.28178
9.84115	1.28198
9.84748	1.2822
9.85381	1.28239
9.86014	1.28257
9.86646	1.28276
9.87279	1.28294
9.87912	1.28301
9.88545	1.28299
9.89178	1.28296
9.89811	1.28289
9.90444	1.28283
9.91077	1.28278
9.91709	1.28273
9.92342	1.28256
9.92975	1.28234
9.93608	1.28221
9.94241	1.28212
9.94874	1.28208
9.95507	1.28205
9.96139	1.28204
9.96772	1.28203
9.97405	1.28201
9.98038	1.28199
9.98671	1.28199
9.99304	1.282
9.99937	1.28202
10.0057	1.28202
10.012	1.28202
10.0183	1.28201
10.0247	1.28197
10.031	1.28186
10.0373	1.2817
10.0437	1.28157
10.05	1.28139
10.0563	1.28115
10.0626	1.2809
10.069	1.28061
10.0753	1.28033
10.0816	1.28011
10.088	1.28001
10.0943	1.27997
10.1006	1.27996
10.107	1.27985
10.1133	1.27964
10.1196	1.27934
10.1259	1.27898
10.1323	1.27859
10.1386	1.27818
10.1449	1.27778
10.1513	1.27732
10.1576	1.27679
10.1639	1.27631
10.1702	1.27598
10.1766	1.27576
10.1829	1.27563
10.1892	1.27564
10.1956	1.27566
10.2019	1.27574
10.2082	1.27582
10.2145	1.27583
10.2209	1.27581
10.2272	1.27571
10.2335	1.27553
10.2399	1.27533
10.2462	1.27507
10.2525	1.27474
10.2588	1.27446
10.2652	1.2742
10.2715	1.27391
10.2778	1.27362
10.2842	1.27331
10.2905	1.273
10.2968	1.27272
10.3032	1.27242
10.3095	1.27209
10.3158	1.27179
10.3221	1.27152
10.3285	1.27133
10.3348	1.27117
10.3411	1.27098
10.3475	1.27079
10.3538	1.27059
10.3601	1.2704
10.3664	1.27023
10.3728	1.27002
10.3791	1.26972
10.3854	1.26947
10.3918	1.26929
10.3981	1.26915
10.4044	1.26901
10.4107	1.26879
10.4171	1.26853
10.4234	1.26829
10.4297	1.26805
10.436	1.26779
10.4424	1.26752
10.4487	1.26729
10.455	1.26711
10.4614	1.26697
10.4677	1.2669
10.474	1.26684
10.4803	1.26677
10.4867	1.26671
10.493	1.26672
10.4993	1.26675
10.5057	1.26682
10.512	1.26693
10.5183	1.26711
10.5246	1.2673
10.531	1.26747
10.5373	1.26765
10.5436	1.2678
10.55	1.26792
10.5563	1.26802
10.5626	1.26811
10.5689	1.26821
10.5753	1.26829
10.5816	1.26836
10.5879	1.26837
10.5943	1.2683
10.6006	1.26817
10.6069	1.26811
10.6133	1.26813
10.6196	1.26814
10.6259	1.26817
10.6322	1.26818
10.6386	1.26822
10.6449	1.26828
10.6512	1.26829
10.6576	1.2683
10.6639	1.2683
10.6702	1.26835
10.6765	1.2684
10.6829	1.26844
10.6892	1.2685
10.6955	1.26857
10.7019	1.26865
10.7082	1.26869
10.7145	1.26871
10.7208	1.26873
10.7272	1.26876
10.7335	1.26883
10.7398	1.26891
10.7462	1.269
10.7525	1.26907
10.7588	1.26911
10.7651	1.26912
10.7715	1.26913
10.7778	1.26919
10.7841	1.26928
10.7905	1.26938
10.7968	1.26951
10.8031	1.26967
10.8094	1.26975
10.8158	1.2698
10.8221	1.26984
10.8284	1.26998
10.8348	1.27016
10.8411	1.2704
10.8474	1.27062
10.8537	1.27079
10.8601	1.27093
10.8664	1.27099
10.8727	1.27096
10.8791	1.27095
10.8854	1.27092
10.8917	1.27086
10.898	1.27076
10.9044	1.27066
10.9107	1.27053
10.917	1.27039
10.9234	1.27026
10.9297	1.27013
10.936	1.27002
10.9423	1.26996
10.9487	1.26995
10.955	1.26996
10.9613	1.26997
10.9677	1.26997
10.974	1.27001
10.9803	1.27012
10.9866	1.27028
10.993	1.27049
10.9993	1.27074
11.0056	1.27104
11.012	1.27132
11.0183	1.27148
11.0246	1.27155
11.031	1.27162
11.0373	1.27175
11.0436	1.27196
11.0499	1.27218
11.0563	1.27242
11.0626	1.27262
11.0689	1.2727
11.0753	1.27268
11.0816	1.27268
11.0879	1.27266
11.0942	1.27264
11.1006	1.27264
11.1069	1.2727
11.1132	1.27287
11.1196	1.27304
11.1259	1.27316
11.1322	1.27329
11.1385	1.2734
11.1449	1.27349
11.1512	1.27357
11.1575	1.27362
11.1639	1.27371
11.1702	1.27381
11.1765	1.27389
11.1828	1.274
11.1892	1.2741
11.1955	1.27419
11.2018	1.27434
11.2081	1.2745
11.2145	1.27459
11.2208	1.27464
11.2271	1.27469
11.2335	1.27468
11.2398	1.27456
11.2461	1.27434
11.2524	1.27415
11.2588	1.27398
11.2651	1.27385
11.2714	1.27375
11.2778	1.27368
11.2841	1.27363
11.2904	1.27362
11.2967	1.27363
11.3031	1.27364
11.3094	1.2737
11.3157	1.27381
11.3221	1.27391
11.3284	1.27402
11.3347	1.27423
11.341	1.27452
11.3474	1.27484
11.3537	1.27522
11.36	1.27567
11.3664	1.27619
11.3727	1.27681
11.379	1.27746
11.3854	1.27804
11.3917	1.27853
11.398	1.27892
11.4043	1.27926
11.4107	1.2796
11.417	1.27987
11.4233	1.27997
11.4297	1.27993
11.436	1.27982
11.4423	1.27958
11.4486	1.27931
11.455	1.27904
11.4613	1.27875
11.4676	1.27846
11.474	1.27821
11.4803	1.27794
11.4866	1.27768
11.4929	1.27741
11.4993	1.27714
11.5056	1.2769
11.5119	1.27681
11.5183	1.27684
11.5246	1.27684
11.5309	1.27687
11.5372	1.27689
11.5436	1.27691
11.5499	1.27693
11.5562	1.27694
11.5626	1.27694
11.5689	1.27691
11.5752	1.27686
11.5816	1.27675
11.5879	1.27654
11.5942	1.2763
11.6005	1.27601
11.6069	1.2757
11.6132	1.27539
11.6195	1.27513
11.6258	1.2749
11.6322	1.27461
11.6385	1.27432
11.6448	1.27408
11.6512	1.2739
11.6575	1.27378
11.6638	1.27367
11.6701	1.27353
11.6765	1.27337
11.6828	1.27318
11.6891	1.27301
11.6955	1.27293
11.7018	1.27285
11.7081	1.27272
11.7144	1.27255
11.7208	1.2723
11.7271	1.27205
11.7334	1.27183
11.7398	1.27164
11.7461	1.27144
11.7524	1.27127
11.7587	1.27114
11.7651	1.27101
11.7714	1.2709
11.7777	1.27082
11.7841	1.27076
11.7904	1.27072
11.7967	1.27071
11.8031	1.27072
11.8094	1.27074
11.8157	1.27075
11.822	1.27071
11.8284	1.2707
11.8347	1.27073
11.841	1.27081
11.8474	1.27094
11.8537	1.27112
11.86	1.27139
11.8663	1.27179
11.8727	1.2723
11.879	1.27288
11.8853	1.2735
11.8917	1.27411
11.898	1.27469
11.9043	1.27531
11.9106	1.27593
11.917	1.27657
11.9233	1.27723
11.9296	1.27786
11.936	1.27846
11.9423	1.27896
11.9486	1.27932
11.9549	1.27955
11.9613	1.27963
11.9676	1.27961
11.9739	1.27958
11.9802	1.27947
11.9866	1.27932
11.9929	1.27913
11.9992	1.27886
12.0056	1.27853
12.0119	1.27814
12.0182	1.27767
12.0246	1.27726
12.0309	1.277
12.0372	1.27687
12.0435	1.2769
12.0499	1.27692
12.0562	1.27704
12.0625	1.27727
12.0689	1.27756
12.0752	1.27789
12.0815	1.27821
12.0878	1.27838
12.0942	1.27834
12.1005	1.27832
12.1068	1.27818
12.1132	1.27793
12.1195	1.27759
12.1258	1.27721
12.1321	1.27683
12.1385	1.27641
12.1448	1.27595
12.1511	1.2755
12.1575	1.27509
12.1638	1.2747
12.1701	1.27439
12.1764	1.27415
12.1828	1.27408
12.1891	1.27387
12.1954	1.27357
12.2018	1.27332
12.2081	1.27316
12.2144	1.27301
12.2208	1.27282
12.2271	1.27261
12.2334	1.27241
12.2397	1.27222
12.2461	1.27202
12.2524	1.27185
12.2587	1.27167
12.2651	1.2715
12.2714	1.27135
12.2777	1.27122
12.284	1.27115
12.2904	1.27113
12.2967	1.27113
12.303	1.27113
12.3094	1.27115
12.3157	1.27117
12.322	1.27117
12.3283	1.2712
12.3347	1.27123
12.341	1.27125
12.3473	1.27136
12.3537	1.27153
12.36	1.27169
12.3663	1.27175
12.3726	1.27175
12.379	1.27175
12.3853	1.27175
12.3916	1.27174
12.3979	1.27174
12.4043	1.27174
12.4106	1.27174
12.4169	1.27174
12.4233	1.27174
12.4296	1.27174
12.4359	1.27172
12.4422	1.27168
12.4486	1.2716
12.4549	1.27148
12.4612	1.27132
12.4676	1.27117
12.4739	1.27101
12.4802	1.27082
12.4865	1.27064
12.4929	1.27043
12.4992	1.27028
12.5055	1.27023
12.5119	1.27024
12.5182	1.2703
12.5245	1.27053
12.5308	1.27086
12.5372	1.2712
12.5435	1.27153
12.5498	1.27174
12.5562	1.27181
12.5625	1.27186
12.5688	1.27196
12.5752	1.2721
12.5815	1.27223
12.5878	1.27235
12.5941	1.27248
12.6005	1.27258
12.6068	1.27268
12.6131	1.27278
12.6195	1.27283
12.6258	1.27282
12.6321	1.27281
12.6384	1.27275
12.6448	1.27264
[truncated: 29,604 more rows]
