# Supplementary material
Source: Royal Society of Chemistry journal article supplement (doi:10.1039/d5ta09732k)
Supplement: d5ta09732k6.xlsx [file d5ta09732k6.xlsx]

## Sheet: IV
750 °C		800 °C		850 °C
Current Density	Voltage	Current Density	Voltage	Current Density	Voltage
0.91	1.798	1.4665	1.798	2.179	1.798
0.9045	1.793	1.4565	1.793	2.168	1.793
0.899	1.788	1.4485	1.788	2.156	1.788
0.8935	1.783	1.44	1.783	2.1435	1.783
0.888	1.778	1.431	1.778	2.1305	1.778
0.882	1.773	1.422	1.773	2.118	1.773
0.8765	1.768	1.4135	1.768	2.105	1.768
0.8705	1.763	1.4045	1.763	2.0915	1.763
0.865	1.758	1.3955	1.758	2.079	1.758
0.8595	1.753	1.3865	1.753	2.066	1.753
0.8535	1.748	1.378	1.748	2.0535	1.748
0.848	1.743	1.369	1.743	2.0405	1.743
0.8425	1.738	1.36	1.738	2.028	1.738
0.8365	1.733	1.3515	1.733	2.013	1.733
0.831	1.728	1.3425	1.728	2	1.728
0.8255	1.723	1.334	1.723	1.9875	1.723
0.82	1.718	1.325	1.718	1.9745	1.718
0.8145	1.713	1.316	1.713	1.9615	1.713
0.8085	1.708	1.3075	1.708	1.9485	1.708
0.803	1.703	1.299	1.703	1.936	1.703
0.7975	1.698	1.29	1.698	1.9235	1.698
0.792	1.693	1.2815	1.693	1.911	1.693
0.7865	1.688	1.273	1.688	1.898	1.688
0.781	1.683	1.264	1.683	1.8855	1.683
0.7755	1.678	1.2555	1.678	1.8725	1.678
0.7705	1.673	1.247	1.673	1.86	1.673
0.765	1.668	1.2385	1.668	1.847	1.668
0.7595	1.663	1.23	1.663	1.8345	1.663
0.754	1.658	1.2215	1.658	1.8225	1.658
0.7485	1.653	1.213	1.653	1.81	1.653
0.743	1.648	1.2045	1.648	1.7975	1.648
0.738	1.643	1.196	1.643	1.785	1.643
0.7325	1.638	1.1875	1.638	1.7725	1.638
0.727	1.633	1.179	1.633	1.7605	1.633
0.722	1.628	1.1705	1.628	1.748	1.628
0.7165	1.623	1.162	1.623	1.7355	1.623
0.711	1.618	1.1535	1.618	1.723	1.618
0.706	1.613	1.1455	1.613	1.711	1.613
0.7005	1.608	1.137	1.608	1.699	1.608
0.6955	1.603	1.1285	1.603	1.687	1.603
0.69	1.598	1.1205	1.598	1.6745	1.598
0.685	1.593	1.112	1.593	1.6625	1.593
0.6795	1.588	1.104	1.588	1.6505	1.588
0.6745	1.583	1.0955	1.583	1.638	1.583
0.669	1.578	1.0875	1.578	1.626	1.578
0.664	1.573	1.079	1.573	1.614	1.573
0.659	1.568	1.071	1.568	1.6025	1.568
0.6535	1.563	1.063	1.563	1.5905	1.563
0.6485	1.558	1.0545	1.558	1.5785	1.558
0.6435	1.553	1.0465	1.553	1.5665	1.553
0.6385	1.548	1.0385	1.548	1.555	1.548
0.633	1.543	1.0305	1.543	1.543	1.543
0.628	1.538	1.0225	1.538	1.531	1.538
0.623	1.533	1.0145	1.533	1.5195	1.533
0.618	1.528	1.0065	1.528	1.508	1.528
0.613	1.523	0.9985	1.523	1.496	1.523
0.608	1.518	0.9905	1.518	1.4845	1.518
0.603	1.513	0.9825	1.513	1.473	1.513
0.598	1.508	0.9745	1.508	1.4615	1.508
0.593	1.503	0.967	1.503	1.4495	1.503
0.588	1.498	0.959	1.498	1.438	1.498
0.583	1.493	0.951	1.493	1.4265	1.493
0.578	1.488	0.9435	1.488	1.415	1.488
0.573	1.483	0.9355	1.483	1.404	1.483
0.568	1.478	0.928	1.478	1.3925	1.478
0.563	1.473	0.92	1.473	1.381	1.473
0.558	1.468	0.9125	1.468	1.3695	1.468
0.5535	1.463	0.9045	1.463	1.3585	1.463
0.5485	1.458	0.897	1.458	1.347	1.458
0.5435	1.453	0.8895	1.453	1.336	1.453
0.5385	1.448	0.8815	1.448	1.3245	1.448
0.534	1.443	0.874	1.443	1.3135	1.443
0.529	1.438	0.8665	1.438	1.3025	1.438
0.524	1.433	0.859	1.433	1.2915	1.433
0.5195	1.428	0.8515	1.428	1.28	1.428
0.5145	1.423	0.8435	1.423	1.269	1.423
0.51	1.418	0.836	1.418	1.258	1.418
0.505	1.413	0.8285	1.413	1.247	1.413
0.5005	1.408	0.821	1.408	1.236	1.408
0.49565	1.403	0.8135	1.403	1.2255	1.403
0.49095	1.398	0.806	1.398	1.2145	1.398
0.4862	1.393	0.799	1.393	1.204	1.393
0.48155	1.388	0.7915	1.388	1.193	1.388
0.4769	1.383	0.784	1.383	1.182	1.383
0.47225	1.378	0.7765	1.378	1.171	1.378
0.4676	1.373	0.769	1.373	1.16	1.373
0.46295	1.368	0.7615	1.368	1.1495	1.368
0.45835	1.363	0.7545	1.363	1.139	1.363
0.4537	1.358	0.747	1.358	1.1285	1.358
0.4491	1.353	0.7395	1.353	1.118	1.353
0.4445	1.348	0.7325	1.348	1.1075	1.348
0.43995	1.343	0.725	1.343	1.0965	1.343
0.43535	1.338	0.718	1.338	1.086	1.338
0.4308	1.333	0.7105	1.333	1.0755	1.333
0.42625	1.328	0.7035	1.328	1.065	1.328
0.42175	1.323	0.6965	1.323	1.0545	1.323
0.4173	1.318	0.6895	1.318	1.044	1.318
0.4128	1.313	0.682	1.313	1.034	1.313
0.40835	1.308	0.675	1.308	1.024	1.308
0.40385	1.303	0.668	1.303	1.0135	1.303
0.3994	1.298	0.661	1.298	1.003	1.298
0.395	1.293	0.654	1.293	0.993	1.293
0.39055	1.288	0.647	1.288	0.9825	1.288
0.38615	1.283	0.64	1.283	0.972	1.283
0.38175	1.278	0.633	1.278	0.9615	1.278
0.37735	1.273	0.626	1.273	0.9515	1.273
0.373	1.268	0.6195	1.268	0.9415	1.268
0.3686	1.263	0.6125	1.263	0.932	1.263
0.36425	1.258	0.6055	1.258	0.922	1.258
0.3599	1.253	0.599	1.253	0.912	1.253
0.3556	1.248	0.592	1.248	0.902	1.248
0.35125	1.243	0.585	1.243	0.892	1.243
0.34695	1.238	0.5785	1.238	0.882	1.238
0.3427	1.233	0.5715	1.233	0.8715	1.233
0.3384	1.228	0.565	1.228	0.8615	1.228
0.33415	1.223	0.558	1.223	0.852	1.223
0.3299	1.218	0.5515	1.218	0.8425	1.218
0.3257	1.213	0.5445	1.213	0.833	1.213
0.3215	1.208	0.538	1.208	0.8235	1.208
0.3173	1.203	0.5315	1.203	0.814	1.203
0.31315	1.198	0.5245	1.198	0.804	1.198
0.30895	1.193	0.518	1.193	0.7945	1.193
0.3048	1.188	0.5115	1.188	0.7845	1.188
0.30065	1.183	0.5045	1.183	0.7745	1.183
0.2965	1.178	0.49805	1.178	0.765	1.178
0.29235	1.173	0.49155	1.173	0.7555	1.173
0.28825	1.168	0.48495	1.168	0.746	1.168
0.2842	1.163	0.47845	1.163	0.737	1.163
0.2801	1.158	0.47195	1.158	0.728	1.158
0.276	1.153	0.4654	1.153	0.7185	1.153
0.27195	1.148	0.459	1.148	0.709	1.148
0.26795	1.143	0.4526	1.143	0.6995	1.143
0.2639	1.138	0.44615	1.138	0.69	1.138
0.25985	1.133	0.43975	1.133	0.6805	1.133
0.25585	1.128	0.43335	1.128	0.671	1.128
0.2519	1.123	0.42705	1.123	0.662	1.123
0.248	1.118	0.42075	1.118	0.653	1.118
0.24405	1.113	0.4145	1.113	0.6445	1.113
0.24015	1.108	0.4083	1.108	0.6355	1.108
0.2363	1.103	0.4021	1.103	0.6265	1.103
0.2324	1.098	0.396	1.098	0.6175	1.098
0.22855	1.093	0.3898	1.093	0.608	1.093
0.2247	1.088	0.3837	1.088	0.5985	1.088
0.22085	1.083	0.3776	1.083	0.5895	1.083
0.217	1.078	0.3716	1.078	0.581	1.078
0.2132	1.073	0.3656	1.073	0.5725	1.073
0.2094	1.068	0.3597	1.068	0.564	1.068
0.2056	1.063	0.35375	1.063	0.5555	1.063
0.20185	1.058	0.34785	1.058	0.547	1.058
0.19795	1.053	0.34205	1.053	0.538	1.053
0.19425	1.048	0.33625	1.048	0.5295	1.048
0.19055	1.043	0.33045	1.043	0.52	1.043
0.1869	1.038	0.32445	1.038	0.5115	1.038
0.1832	1.033	0.3186	1.033	0.503	1.033
0.17955	1.028	0.3128	1.028	0.49455	1.028
0.1759	1.023	0.3071	1.023	0.4865	1.023
0.17225	1.018	0.30145	1.018	0.47865	1.018
0.16865	1.013	0.2958	1.013	0.47055	1.013
0.1651	1.008	0.2902	1.008	0.4621	1.008
0.16155	1.003	0.2846	1.003	0.4535	1.003
0.158	0.9984	0.27905	0.9983	0.44475	0.9983
0.1545	0.9934	0.2735	0.9933	0.43625	0.9932
0.151	0.9884	0.268	0.9883	0.42815	0.9883
0.14755	0.9834	0.26255	0.9833	0.42045	0.9833
0.14415	0.9784	0.2571	0.9783	0.41285	0.9783
0.14075	0.9734	0.25165	0.9733	0.4053	0.9733
0.13735	0.9684	0.2463	0.9683	0.39755	0.9683
0.134	0.9634	0.2409	0.9633	0.3894	0.9633
0.1307	0.9584	0.2356	0.9583	0.38105	0.9583
0.1274	0.9534	0.2303	0.9533	0.37275	0.9533
0.1241	0.9485	0.225	0.9484	0.3648	0.9483
0.12085	0.9434	0.21975	0.9433	0.35715	0.9432
0.1176	0.9384	0.21455	0.9383	0.34975	0.9383
0.11435	0.9334	0.2094	0.9333	0.34255	0.9333
0.1112	0.9285	0.2043	0.9283	0.33555	0.9283
0.10805	0.9235	0.19915	0.9233	0.32835	0.9233
0.10495	0.9184	0.19385	0.9183	0.3211	0.9183
0.1019	0.9134	0.1889	0.9133	0.31345	0.9133
0.0989	0.9084	0.184	0.9083	0.3057	0.9083
0.0959	0.9034	0.1792	0.9033	0.29795	0.9033
0.09295	0.8984	0.17445	0.8983	0.29055	0.8983
0.09005	0.8934	0.16965	0.8933	0.2835	0.8933
0.0872	0.8884	0.1649	0.8883	0.27675	0.8883
0.0844	0.8835	0.1603	0.8833	0.27015	0.8833
0.08165	0.8785	0.15565	0.8784	0.26365	0.8783
0.0789	0.8735	0.15115	0.8734	0.2572	0.8734
0.07625	0.8685	0.1467	0.8683	0.2502	0.8684
0.07365	0.8635	0.14235	0.8633	0.2429	0.8633
0.0711	0.8585	0.138	0.8584	0.2357	0.8583
0.0686	0.8535	0.1337	0.8534	0.2289	0.8533
0.06615	0.8485	0.1295	0.8484	0.22255	0.8484
0.06375	0.8435	0.1254	0.8433	0.21645	0.8433
0.06145	0.8385	0.1214	0.8384	0.2106	0.8383
0.0592	0.8335	0.1175	0.8334	0.20475	0.8334
0.05695	0.8285	0.11355	0.8284	0.19875	0.8284
0.05485	0.8235	0.10965	0.8234	0.1923	0.8234
0.05275	0.8185	0.1059	0.8184	0.18575	0.8184
0.05075	0.8135	0.10215	0.8134	0.17925	0.8134
0.04885	0.8085	0.09855	0.8084	0.17315	0.8083
0.04698	0.8035	0.09495	0.8034	0.16745	0.8034
0.04516	0.7985	0.0914	0.7984	0.1621	0.7984
0.04341	0.7935	0.08795	0.7934	0.15705	0.7934
0.04172	0.7885	0.0846	0.7884	0.15195	0.7884
0.04005	0.7835	0.0812	0.7834	0.14665	0.7834
0.03847	0.7786	0.0779	0.7784	0.14105	0.7784
0.03694	0.7735	0.07475	0.7734	0.1353	0.7734
0.03544	0.7685	0.0717	0.7684	0.12975	0.7684
0.03399	0.7635	0.0687	0.7634	0.1246	0.7634
0.03257	0.7585	0.06585	0.7584	0.11965	0.7584
0.03119	0.7536	0.063	0.7534	0.11495	0.7534
0.02986	0.7485	0.0602	0.7484	0.11045	0.7484
0.02857	0.7436	0.05755	0.7435	0.10615	0.7434
0.0273	0.7385	0.05495	0.7384	0.10205	0.7384
0.02609	0.7336	0.0524	0.7334	0.09795	0.7334
0.0249	0.7286	0.04996	0.7285	0.0937	0.7284
0.02374	0.7236	0.04759	0.7235	0.0893	0.7234
0.02264	0.7186	0.04527	0.7185	0.08475	0.7184
0.02158	0.7135	0.04302	0.7134	0.0804	0.7134
0.02054	0.7086	0.04086	0.7085	0.0765	0.7084
0.01955	0.7035	0.03877	0.7034	0.0729	0.7034
0.01859	0.6986	0.03672	0.6984	0.0695	0.6984
0.01769	0.6936	0.03477	0.6934	0.0663	0.6934
0.01683	0.6886	0.03291	0.6885	0.0633	0.6884
0.016	0.6836	0.03117	0.6835	0.06015	0.6834
0.0152	0.6786	0.02946	0.6785	0.0568	0.6784
0.01444	0.6736	0.0278	0.6735	0.0534	0.6735
0.01372	0.6686	0.02622	0.6685	0.0502	0.6685
0.01301	0.6636	0.02472	0.6635	0.04741	0.6635
0.01233	0.6586	0.02335	0.6585	0.04487	0.6584
0.01167	0.6536	0.022	0.6535	0.04256	0.6535
0.01105	0.6486	0.02073	0.6485	0.04035	0.6485
0.01046	0.6436	0.01951	0.6435	0.03828	0.6435
0.0099	0.6386	0.01833	0.6385	0.03609	0.6385
0.00936	0.6336	0.01725	0.6335	0.03384	0.6335
0.00886	0.6286	0.01622	0.6285	0.03164	0.6285
0.00837	0.6237	0.01526	0.6235	0.0295	0.6235
0.00793	0.6187	0.01436	0.6185	0.02754	0.6185
0.00752	0.6136	0.0135	0.6135	0.02585	0.6135
0.00711	0.6087	0.01269	0.6085	0.0244	0.6085
0.00673	0.6037	0.01196	0.6035	0.02306	0.6035
0.00637	0.5987	0.01125	0.5985	0.02175	0.5985
0.00604	0.5937	0.01059	0.5935	0.02048	0.5935
0.00572	0.5887	0.00997	0.5886	0.01924	0.5885
0.00542	0.5837	0.00939	0.5835	0.01788	0.5835
0.00515	0.5787	0.00884	0.5785	0.0166	0.5785
0.00489	0.5737	0.00834	0.5735	0.01547	0.5735
0.00465	0.5687	0.00787	0.5686	0.01446	0.5685
0.00443	0.5637	0.00744	0.5636	0.01359	0.5635
0.00423	0.5587	0.00701	0.5586	0.01283	0.5585
0.00406	0.5537	0.00663	0.5536	0.01214	0.5535
0.00389	0.5487	0.00629	0.5485	0.0115	0.5486
0.00374	0.5437	0.00598	0.5436	0.01085	0.5436
0.0036	0.5387	0.00567	0.5386	0.01018	0.5386
0.00347	0.5337	0.0054	0.5336	0.00953	0.5335
0.00336	0.5287	0.00513	0.5286	0.0089	0.5285
0.00325	0.5237	0.0049	0.5236	0.00831	0.5236
0.00316	0.5187	0.00466	0.5186	0.00781	0.5186
0.00308	0.5138	0.00444	0.5136	0.0074	0.5136
0.00301	0.5088	0.00425	0.5086	0.00704	0.5086
0.00295	0.5037	0.00407	0.5036	0.00672	0.5035
0.0029	0.4987	0.00391	0.4986	0.00641	0.4985
0.00286	0.4937	0.00376	0.4936	0.00609	0.4936
0.00283	0.4888	0.00363	0.4886	0.00575	0.4886
0.0028	0.4838	0.00352	0.4836	0.00542	0.4835
0.00278	0.4788	0.00341	0.4786	0.00513	0.4786
0.00277	0.4738	0.00332	0.4736	0.0049	0.4736
0.00276	0.4688	0.00323	0.4687	0.0047	0.4686
0.00275	0.4638	0.00314	0.4636	0.00454	0.4636
0.00274	0.4588	0.00307	0.4586	0.0044	0.4586
0.00273	0.4538	0.003	0.4536	0.00425	0.4536
0.00272	0.4488	0.00294	0.4486	0.0041	0.4486
0.00271	0.4438	0.00289	0.4436	0.00394	0.4436
0.0027	0.4388	0.00284	0.4386	0.00379	0.4386
0.0027	0.4337	0.0028	0.4336	0.00367	0.4335
0.00269	0.4287	0.00276	0.4286	0.00358	0.4285
0.00269	0.4238	0.00273	0.4236	0.00351	0.4236
0.00269	0.4188	0.0027	0.4186	0.00345	0.4186
0.00269	0.4137	0.00267	0.4136	0.00339	0.4136
0.00268	0.4088	0.00265	0.4086	0.00333	0.4086
0.00268	0.4038	0.00263	0.4036	0.00326	0.4036
0.00268	0.3988	0.00261	0.3986	0.0032	0.3986
0.00268	0.3938	0.0026	0.3937	0.00314	0.3936
0.00268	0.3888	0.00259	0.3887	0.00309	0.3887
0.00268	0.3839	0.00258	0.3836	0.00306	0.3837
0.00268	0.3788	0.00257	0.3787	0.00303	0.3787
0.00268	0.3738	0.00256	0.3737	0.00301	0.3737
0.00268	0.3688	0.00256	0.3687	0.00299	0.3687
0.00268	0.3639	0.00255	0.3637	0.00297	0.3637
0.00268	0.3589	0.00255	0.3587	0.00295	0.3587
0.00268	0.3538	0.00254	0.3537	0.00293	0.3537
0.00268	0.3489	0.00254	0.3487	0.0029	0.3487
0.00267	0.3439	0.00254	0.3437	0.00288	0.3437
0.00267	0.3389	0.00254	0.3387	0.00285	0.3387
0.00267	0.3339	0.00253	0.3337	0.00284	0.3337
0.00267	0.3288	0.00253	0.3287	0.00282	0.3287
0.00266	0.3239	0.00253	0.3237	0.00281	0.3237
0.00266	0.3189	0.00253	0.3187	0.0028	0.3187
0.00265	0.3139	0.00252	0.3137	0.00278	0.3137
0.00264	0.3089	0.00251	0.3087	0.00275	0.3087
0.00264	0.3039	0.0025	0.3037	0.00272	0.3037
0.00263	0.2989	0.00249	0.2987	0.00269	0.2987
0.00261	0.2939	0.00248	0.2937	0.00266	0.2937
0.0026	0.2889	0.00246	0.2888	0.00264	0.2887
0.00258	0.2839	0.00245	0.2838	0.0026	0.2837
0.00256	0.2789	0.00242	0.2787	0.00256	0.2787
0.00254	0.2739	0.00239	0.2738	0.0025	0.2738
0.00251	0.2689	0.00235	0.2688	0.00244	0.2687
0.00248	0.2639	0.00231	0.2638	0.00236	0.2638
0.00244	0.2589	0.00225	0.2588	0.00227	0.2587
0.00239	0.2539	0.00219	0.2538	0.00218	0.2537
0.00233	0.2489	0.00211	0.2488	0.00206	0.2487
0.00227	0.2439	0.00201	0.2438	0.00193	0.2438
0.00219	0.2389	0.0019	0.2388	0.00177	0.2387
0.0021	0.234	0.00177	0.2338	0.00159	0.2338
0.00199	0.2289	0.00162	0.2288	0.00139	0.2287
0.00186	0.2239	0.00143	0.2238	0.00116	0.2238
0.00171	0.2189	0.00122	0.2188	0.0009045	0.2188
0.00154	0.214	0.0009805	0.2138	0.0006075	0.2138
0.00133	0.2089	0.000713	0.2088	0.00025785	0.2088
0.00109	0.2039	0.0003878	0.2038	-0.00016955	0.2038
0.0008235	0.1989	2.322e-05	0.1988	-0.0002734	0.1988

## Sheet: 1.5 V EIS
750 °C		800 °C		850 °C
Z'	-Z"	Z'	-Z"	Z'	-Z"
0.9148	-1.2166	0.6258	-1.2298	0.4478	-1.2362
0.9124	-0.962	0.6208	-0.9742	0.4414	-0.98
0.9126	-0.7626	0.6144	-0.792	0.4518	-0.7768
0.9122	-0.6042	0.6192	-0.615	0.4384	-0.6194
0.9102	-0.4798	0.6184	-0.4864	0.4372	-0.4926
0.9078	-0.3812	0.6176	-0.387	0.4374	-0.3912
0.9102	-0.3008	0.6168	-0.3078	0.4348	-0.3104
0.9046	-0.2444	0.616	-0.244	0.4304	-0.2432
0.91	-0.1883	0.615	-0.19346	0.4346	-0.19664
0.9078	-0.14774	0.6184	-0.1524	0.4336	-0.15588
0.9102	-0.11592	0.6158	-0.1212	0.4336	-0.12374
0.9094	-0.0904	0.6164	-0.09522	0.4334	-0.09786
0.9102	-0.0697	0.617	-0.07456	0.4334	-0.077
0.912	-0.05316	0.6176	-0.0582	0.4338	-0.0609
0.9086	-0.0402	0.6172	-0.04516	0.4336	-0.04794
0.9134	-0.02932	0.6192	-0.0347	0.4342	-0.0365
0.9146	-0.02038	0.6206	-0.0266	0.435	-0.0288
0.9146	-0.01316	0.623	-0.01941	0.4354	-0.02258
0.9168	-0.0073	0.6206	-0.01349	0.4344	-0.01654
0.9194	-0.00278	0.6216	-0.00845	0.4364	-0.01232
0.9212	0.0015	0.6242	-0.00519	0.4352	-0.00912
0.927	0.00372	0.6238	-0.00259	0.4376	-0.00629
0.926	0.00768	0.6262	-0.0002486	0.437	-0.00414
0.9274	0.01033	0.6284	0.00192	0.4386	-0.00249
0.929	0.01235	0.6282	0.00374	0.4378	-0.0006648
0.9306	0.01434	0.629	0.00479	0.4398	0.00011336
0.9338	0.01587	0.633	0.00586	0.4392	0.0007002
0.9378	0.01721	0.6338	0.00616	0.4394	0.00171
0.94	0.01816	0.6332	0.00736	0.4422	0.00205
0.9436	0.0186	0.6356	0.00696	0.4408	0.00274
0.9448	0.02026	0.6382	0.00777	0.4406	0.00318
0.9496	0.0204	0.6372	0.00806	0.442	0.00355
0.9526	0.02068	0.6392	0.00901	0.445	0.0041
0.9546	0.02084	0.6416	0.00931	0.4438	0.00501
0.959	0.02142	0.642	0.00995	0.4448	0.00539
0.9622	0.02132	0.6424	0.0105	0.4452	0.00591
0.9622	0.0231	0.6464	0.01199	0.4478	0.00548
0.9654	0.0222	0.6476	0.01145	0.4482	0.00701
0.9702	0.02318	0.65	0.01212	0.4506	0.0068
0.9722	0.02412	0.6504	0.0127	0.451	0.00762
0.9776	0.02392	0.6544	0.0127	0.4502	0.00817
0.9782	0.02644	0.658	0.01307	0.4516	0.00825
0.9858	0.0272	0.6602	0.01319	0.4538	0.00815
0.9886	0.02978	0.6622	0.01339	0.4572	0.00866
0.9906	0.0309	0.6618	0.01366	0.4576	0.00748
0.9964	0.03218	0.6658	0.01361	0.4592	0.00798
1.0008	0.03328	0.6662	0.01311	0.4616	0.00579
1.0078	0.03392	0.6716	0.01262	0.4628	0.00642
1.011	0.03388	0.6726	0.01138	0.4626	0.00377
1.0202	0.03608	0.6748	0.01035	0.4628	0.00667
1.0238	0.03812	0.6758	0.01067	0.4638	0.0044
1.0308	0.03564	0.6786	0.00797	0.4646	0.00334
1.0492	0.02658	0.6828	0.00808	0.4652	0.00539
1.0436	0.0342	0.6802	0.0068	0.4652	0.00214
1.0526	0.02698	0.6808	0.00481	0.4654	0.00108
1.0568	0.02258	0.6812	0.0032	0.4664	0.00101
1.0594	0.01933	0.6824	0.00292	0.4662	0.0003
1.0616	0.01451	0.6826	0.00146	0.4662	-0.0003724
1.063	0.01113	0.683	0.0003108	0.4664	-0.00108
1.064	0.00753	0.6832	-0.0009064	0.4662	-0.00196
1.0646	0.00436	0.683	-0.00226	0.466	-0.00297
1.0642	0.00101	0.6826	-0.00378	0.4656	-0.00396
1.0638	-0.00126	0.682	-0.00519	0.4648	-0.00509
1.0624	-0.00425	0.681	-0.00648	0.464	-0.00625
1.061	-0.00625	0.6798	-0.00786	0.4628	-0.00722
1.0596	-0.00825	0.6782	-0.00885	0.4614	-0.00802
1.0576	-0.00955	0.6766	-0.00964	0.4598	-0.00859
1.0556	-0.01043	0.6746	-0.00994	0.4582	-0.00876
1.0534	-0.01062	0.6728	-0.0099	0.4566	-0.00867
1.0516	-0.01049	0.6712	-0.00963	0.4552	-0.0083
1.0506	-0.01033	0.67	-0.00901	0.4538	-0.0078

## Sheet: OCV EIS
750 °C		800 °C		850 °C
Z'	-Z"	Z'	-Z"	Z'	-Z"
1.3578	-1.1048	0.9678	-1.1242	0.7728	-1.1158
1.3782	-0.8218	0.99	-0.8422	0.798	-0.845
1.4004	-0.6222	1.0146	-0.6354	0.8344	-0.6118
1.4308	-0.4368	1.0432	-0.4538	0.8552	-0.4434
1.4542	-0.3048	1.0668	-0.306	0.8806	-0.2994
1.4868	-0.18334	1.108	-0.2028	0.9092	-0.18188
1.519	-0.09626	1.124	-0.1005	0.94	-0.0843
1.5524	-0.02148	1.1558	-0.02138	0.9724	-0.00152
1.5866	0.04814	1.1886	0.04684	1.0082	0.06784
1.6232	0.09708	1.2274	0.10224	1.0474	0.12782
1.6618	0.1415	1.2612	0.14982	1.0886	0.1803
1.7018	0.17972	1.3036	0.19108	1.1332	0.2272
1.7438	0.2142	1.3472	0.229	1.1804	0.2716
1.7858	0.244	1.393	0.2624	1.2336	0.31
1.8306	0.2718	1.46	0.31	1.2896	0.3444
1.8778	0.2976	1.4914	0.3224	1.3488	0.3796
1.9288	0.322	1.547	0.3498	1.4148	0.413
1.979	0.3428	1.6614	0.3686	1.4816	0.4442
2.04	0.3692	1.6736	0.4034	1.563	0.4724
2.1	0.3904	1.74	0.4244	1.6492	0.4988
2.16	0.4154	1.809	0.445	1.7242	0.5186
2.232	0.4292	1.8854	0.4618	1.8192	0.5282
2.306	0.4476	1.9614	0.4714	1.9088	0.5388
2.372	0.4582	2.044	0.4816	2	0.5414
2.454	0.4654	2.128	0.4828	2.094	0.5322
2.532	0.4678	2.214	0.4724	2.188	0.5148
2.616	0.4648	2.296	0.4596	2.276	0.491
2.696	0.4548	2.372	0.4386	2.354	0.4658
2.766	0.445	2.436	0.4162	2.42	0.4384
2.842	0.418	2.498	0.3904	2.476	0.4042
2.896	0.3968	2.546	0.3622	2.526	0.3786
2.956	0.3766	2.592	0.3404	2.572	0.3568
3.002	0.3564	2.624	0.3192	2.606	0.336
3.042	0.341	2.668	0.314	2.654	0.3298
3.076	0.3308	2.694	0.309	2.672	0.3234
3.106	0.3316	2.72	0.3098	2.708	0.3324
3.154	0.3324	2.744	0.3258	2.728	0.3466
3.174	0.3512	2.778	0.3426	2.764	0.3648
3.202	0.3732	2.804	0.374	2.798	0.3952
3.244	0.4086	2.838	0.4136	2.832	0.4412
3.286	0.4504	2.882	0.4652	2.878	0.5004
3.32	0.5074	2.922	0.5258	2.916	0.568
3.378	0.58	2.972	0.6084	2.97	0.6534
3.434	0.6704	3.026	0.7092	3.042	0.764
3.492	0.7752	3.09	0.8198	3.118	0.888
3.572	0.8986	3.172	0.9462	3.208	1.0262
3.678	1.072	3.308	1.1262	3.342	1.2008
3.79	1.2382	3.404	1.2952	3.516	1.3464
3.918	1.4266	3.596	1.4982	3.706	1.5588
4.084	1.6444	3.858	1.7532	4.032	1.7814
4.36	1.8868	4.058	1.9728	4.214	1.9896
4.632	2.128	4.398	2.192	4.548	2.1
4.922	2.508	4.628	2.498	4.812	2.13
5.496	2.652	5.238	2.602	5.342	2.462
5.968	2.868	5.69	2.826	5.832	2.602
6.494	2.986	6.268	2.992	6.246	2.59
7.124	3.112	6.802	2.974	6.842	2.708
7.738	3.096	7.4	2.972	7.344	2.662
8.324	2.978	7.93	2.874	7.826	2.56
8.87	2.824	8.462	2.734	8.29	2.434
9.372	2.626	8.954	2.538	8.712	2.266
9.804	2.358	9.37	2.316	9.096	2.06
10.172	2.114	9.74	2.066	9.418	1.853
10.482	1.8456	10.042	1.803	9.702	1.6414
10.732	1.5764	10.308	1.5626	9.944	1.4256
10.936	1.3362	10.526	1.3392	10.148	1.239
11.102	1.1192	10.708	1.1328	10.308	1.0576
11.24	0.9294	10.866	0.9488	10.452	0.9008
11.352	0.7636	10.998	0.7928	10.562	0.769
11.454	0.6284	11.114	0.66	10.662	0.6594
11.534	0.5118	11.21	0.5518	10.734	0.567

## Sheet: 850 °C EIS
0.9 V		1.1 V		1.3 V		1.5 V
Z'	-Z"	Z'	-Z"	Z'	-Z"	Z'	-Z"
0.5246	-1.2248	0.4924	-1.231	0.458	-1.2324	0.4478	-1.2362
0.5222	-0.97	0.4918	-0.9772	0.456	-0.9782	0.4414	-0.98
0.5208	-0.7708	0.488	-0.7752	0.4544	-0.7784	0.4518	-0.7768
0.5214	-0.6118	0.4868	-0.6164	0.453	-0.6178	0.4384	-0.6194
0.518	-0.4846	0.4872	-0.489	0.4518	-0.4918	0.4372	-0.4926
0.52	-0.3834	0.4874	-0.3882	0.454	-0.3882	0.4374	-0.3912
0.5206	-0.3038	0.4856	-0.3078	0.4508	-0.3102	0.4348	-0.3104
0.5194	-0.2396	0.485	-0.2442	0.4496	-0.2462	0.4304	-0.2432
0.5206	-0.18848	0.483	-0.19892	0.4498	-0.1954	0.4346	-0.19664
0.524	-0.1482	0.4846	-0.15318	0.4502	-0.15496	0.4336	-0.15588
0.5232	-0.11566	0.4858	-0.12122	0.4508	-0.12216	0.4336	-0.12374
0.5224	-0.09022	0.4856	-0.09414	0.45	-0.09692	0.4334	-0.09786
0.5256	-0.06966	0.4868	-0.07448	0.4502	-0.07616	0.4334	-0.077
0.528	-0.05284	0.4858	-0.05874	0.451	-0.05986	0.4338	-0.0609
0.5282	-0.03974	0.4854	-0.0452	0.4508	-0.04672	0.4336	-0.04794
0.5278	-0.02906	0.485	-0.03434	0.4506	-0.03612	0.4342	-0.0365
0.534	-0.02098	0.486	-0.02664	0.4504	-0.02704	0.435	-0.0288
0.532	-0.014426	0.4864	-0.019658	0.4536	-0.02094	0.4354	-0.02258
0.5326	-0.009522	0.4904	-0.013982	0.4518	-0.015378	0.4344	-0.01654
0.537	-0.00412	0.4878	-0.00977	0.455	-0.011218	0.4364	-0.01232
0.5386	-0.0009378	0.49	-0.006288	0.4534	-0.007698	0.4352	-0.00912
0.5386	0.000653	0.4906	-0.003654	0.4552	-0.004048	0.4376	-0.00629
0.5432	0.003958	0.4916	-0.0014664	0.4562	-0.002906	0.437	-0.00414
0.5434	0.005684	0.4928	0.000327	0.456	-0.0008456	0.4386	-0.00249
0.543	0.007286	0.4946	0.002082	0.459	9.012e-06	0.4378	-0.0006648
0.5482	0.008122	0.4934	0.003196	0.457	0.0014614	0.4398	0.00011336
0.549	0.009506	0.4964	0.00449	0.4594	0.002326	0.4392	0.0007002
0.5482	0.009956	0.4962	0.004744	0.4602	0.003422	0.4394	0.00171
0.5528	0.010738	0.4988	0.005896	0.4602	0.003426	0.4422	0.00205
0.5554	0.011702	0.4972	0.006186	0.4626	0.004516	0.4408	0.00274
0.5544	0.01164	0.5016	0.006864	0.4612	0.005148	0.4406	0.00318
0.5604	0.012264	0.5032	0.007684	0.465	0.005428	0.442	0.00355
0.5564	0.01319	0.5044	0.007854	0.4654	0.005712	0.445	0.0041
0.561	0.014684	0.5048	0.008442	0.4644	0.006896	0.4438	0.00501
0.5644	0.015952	0.5058	0.00944	0.466	0.007272	0.4448	0.00539
0.5636	0.016594	0.504	0.010372	0.4692	0.007498	0.4452	0.00591
0.5684	0.016338	0.5084	0.012406	0.4682	0.007222	0.4478	0.00548
0.5664	0.01938	0.5086	0.012142	0.4688	0.00918	0.4482	0.00701
0.568	0.02064	0.5104	0.012518	0.471	0.010126	0.4506	0.0068
0.5748	0.02284	0.512	0.013456	0.4736	0.010232	0.451	0.00762
0.5754	0.0239	0.517	0.01174	0.4774	0.009944	0.4502	0.00817
0.576	0.0275	0.5184	0.014928	0.4794	0.011088	0.4516	0.00825
0.58	0.03092	0.5176	0.016464	0.4784	0.011446	0.4538	0.00815
0.5926	0.03352	0.518	0.017382	0.4806	0.012236	0.4572	0.00866
0.596	0.0381	0.5274	0.01868	0.482	0.011602	0.4576	0.00748
0.6014	0.03884	0.5234	0.02028	0.485	0.011056	0.4592	0.00798
0.5954	0.04564	0.5318	0.015822	0.4872	0.013504	0.4616	0.00579
0.6226	0.0423	0.538	0.02508	0.4886	0.013092	0.4628	0.00642
0.6236	0.04	0.542	0.016494	0.4916	0.010726	0.4626	0.00377
0.6692	0.05366	0.5572	0.018456	0.4884	0.011004	0.4628	0.00667
0.6396	0.05168	0.546	0.015824	0.4922	0.008708	0.4638	0.0044
0.6738	0.0539	0.5454	0.016536	0.5004	0.006418	0.4646	0.00334
0.6432	0.08186	0.5666	0.03086	0.5058	0.003752	0.4652	0.00539
0.6748	0.04942	0.5522	0.00573	0.4964	0.003498	0.4652	0.00214
0.6784	0.04008	0.553	0.011538	0.4974	0.004664	0.4654	0.00108
0.6802	0.03292	0.556	0.010312	0.4986	0.004632	0.4664	0.00101
0.6818	0.02478	0.5558	0.007856	0.4996	0.003284	0.4662	0.0003
0.6866	0.0229	0.5572	0.007196	0.4996	0.002642	0.4662	-0.0003724
0.6884	0.0201	0.5582	0.006672	0.5	0.002156	0.4664	-0.00108
0.6904	0.017762	0.559	0.00575	0.5004	0.001489	0.4662	-0.00196
0.6926	0.016928	0.5594	0.00456	0.5006	0.0010064	0.466	-0.00297
0.694	0.014184	0.56	0.004432	0.5006	0.0002198	0.4656	-0.00396
0.6952	0.012532	0.5604	0.00391	0.5006	-0.0004946	0.4648	-0.00509
0.6962	0.010488	0.5608	0.003374	0.5006	-0.0010498	0.464	-0.00625
0.6974	0.009892	0.561	0.002736	0.5002	-0.0017646	0.4628	-0.00722
0.6982	0.00809	0.5612	0.00227	0.4998	-0.002288	0.4614	-0.00802
0.699	0.00716	0.5612	0.0019166	0.4992	-0.0026	0.4598	-0.00859
0.6996	0.006098	0.5614	0.0016264	0.4986	-0.00281	0.4582	-0.00876
0.7002	0.00544	0.5614	0.0013444	0.498	-0.002948	0.4566	-0.00867
0.7006	0.004924	0.5614	0.001153	0.4976	-0.002884	0.4552	-0.0083
0.701	0.004288	0.5612	0.0010128	0.4972	-0.002758	0.4538	-0.0078
