# Supplementary material
Source: Royal Society of Chemistry journal article supplement (doi:10.1039/d5ta09732k)
Supplement: d5ta09732k7.xlsx [file d5ta09732k7.xlsx]

## Sheet: IV
750 °C		800 °C		850 °C
Current Density	Voltage	Current Density	Voltage	Current Density	Voltage
0.723	1.798	1.2485	1.798	1.878	1.798
0.7165	1.793	1.24	1.793	1.868	1.793
0.7115	1.788	1.232	1.788	1.858	1.788
0.7065	1.783	1.2245	1.783	1.847	1.783
0.701	1.778	1.2165	1.778	1.836	1.778
0.696	1.773	1.2085	1.773	1.825	1.773
0.691	1.768	1.2005	1.768	1.8135	1.768
0.686	1.763	1.1925	1.763	1.8025	1.763
0.681	1.758	1.1845	1.758	1.7915	1.758
0.676	1.753	1.177	1.753	1.78	1.753
0.671	1.748	1.169	1.748	1.769	1.748
0.6665	1.743	1.161	1.743	1.758	1.743
0.6615	1.738	1.1535	1.738	1.7465	1.738
0.6565	1.733	1.1455	1.733	1.735	1.733
0.652	1.728	1.1375	1.728	1.7245	1.728
0.647	1.723	1.13	1.723	1.713	1.723
0.6425	1.718	1.1225	1.718	1.702	1.718
0.6375	1.713	1.1145	1.713	1.691	1.713
0.633	1.708	1.107	1.708	1.6795	1.708
0.628	1.703	1.0995	1.703	1.6685	1.703
0.6235	1.698	1.0915	1.698	1.658	1.698
0.619	1.693	1.084	1.693	1.6465	1.693
0.6145	1.688	1.0765	1.688	1.6355	1.688
0.6095	1.683	1.069	1.683	1.625	1.683
0.605	1.678	1.0615	1.678	1.6135	1.678
0.6005	1.673	1.054	1.673	1.603	1.673
0.596	1.668	1.0465	1.668	1.5925	1.668
0.5915	1.663	1.039	1.663	1.581	1.663
0.587	1.658	1.0315	1.658	1.5705	1.658
0.5825	1.653	1.024	1.653	1.56	1.653
0.578	1.648	1.017	1.648	1.5485	1.648
0.5735	1.643	1.0095	1.643	1.5385	1.643
0.569	1.638	1.002	1.638	1.528	1.638
0.5645	1.633	0.995	1.633	1.5165	1.633
0.5605	1.628	0.9875	1.628	1.5065	1.628
0.556	1.623	0.9805	1.623	1.496	1.623
0.5515	1.618	0.973	1.618	1.4845	1.618
0.547	1.613	0.9655	1.613	1.4745	1.613
0.543	1.608	0.9585	1.608	1.4645	1.608
0.5385	1.603	0.9515	1.603	1.453	1.603
0.534	1.598	0.944	1.598	1.4425	1.598
0.53	1.593	0.937	1.593	1.433	1.593
0.5255	1.588	0.93	1.588	1.422	1.588
0.5215	1.583	0.9225	1.583	1.4115	1.583
0.517	1.578	0.9155	1.578	1.4015	1.578
0.513	1.573	0.9085	1.573	1.391	1.573
0.5085	1.568	0.9015	1.568	1.38	1.568
0.5045	1.563	0.8945	1.563	1.3705	1.563
0.5	1.558	0.8875	1.558	1.36	1.558
0.4959	1.553	0.8805	1.553	1.3495	1.553
0.49175	1.548	0.8735	1.548	1.3395	1.548
0.48755	1.543	0.8665	1.543	1.3295	1.543
0.4834	1.538	0.8595	1.538	1.3185	1.538
0.47925	1.533	0.8525	1.533	1.309	1.533
0.4751	1.528	0.846	1.528	1.299	1.528
0.471	1.523	0.839	1.523	1.2885	1.523
0.46685	1.518	0.832	1.518	1.2785	1.518
0.4628	1.513	0.8255	1.513	1.269	1.513
0.45865	1.508	0.8185	1.508	1.258	1.508
0.45455	1.503	0.8115	1.503	1.248	1.503
0.4505	1.498	0.805	1.498	1.239	1.498
0.44645	1.493	0.798	1.493	1.2285	1.493
0.44245	1.488	0.791	1.488	1.218	1.488
0.4384	1.483	0.7845	1.483	1.209	1.483
0.4344	1.478	0.7775	1.478	1.199	1.478
0.4304	1.473	0.771	1.473	1.1885	1.473
0.4264	1.468	0.7645	1.468	1.1795	1.468
0.4224	1.463	0.7575	1.463	1.1695	1.463
0.41845	1.458	0.751	1.458	1.159	1.458
0.4145	1.453	0.7445	1.453	1.15	1.453
0.41055	1.448	0.7375	1.448	1.1405	1.448
0.4066	1.443	0.731	1.443	1.13	1.443
0.4027	1.438	0.7245	1.438	1.1205	1.438
0.3988	1.433	0.718	1.433	1.1115	1.433
0.39485	1.428	0.7115	1.428	1.101	1.428
0.391	1.423	0.705	1.423	1.0915	1.423
0.38715	1.418	0.6985	1.418	1.083	1.418
0.3832	1.413	0.692	1.413	1.0725	1.413
0.3794	1.408	0.6855	1.408	1.063	1.408
0.37555	1.403	0.679	1.403	1.054	1.403
0.3717	1.398	0.6725	1.398	1.0445	1.398
0.36795	1.393	0.6665	1.393	1.0345	1.393
0.3641	1.388	0.6595	1.388	1.0255	1.388
0.3603	1.383	0.6535	1.383	1.0165	1.383
0.35655	1.378	0.647	1.378	1.0065	1.378
0.3528	1.373	0.6405	1.373	0.9975	1.373
0.349	1.368	0.6345	1.368	0.9885	1.368
0.34525	1.363	0.628	1.363	0.9785	1.363
0.34155	1.358	0.6215	1.358	0.9695	1.358
0.3378	1.353	0.6155	1.353	0.961	1.353
0.3341	1.348	0.609	1.348	0.951	1.348
0.33045	1.343	0.603	1.343	0.9415	1.343
0.3267	1.338	0.597	1.338	0.933	1.338
0.32305	1.333	0.5905	1.333	0.9235	1.333
0.3194	1.328	0.5845	1.328	0.914	1.328
0.3157	1.323	0.5785	1.323	0.9055	1.323
0.3121	1.318	0.572	1.318	0.8965	1.318
0.30845	1.313	0.566	1.313	0.887	1.313
0.3048	1.308	0.56	1.308	0.878	1.308
0.30125	1.303	0.5535	1.303	0.8695	1.303
0.29765	1.298	0.5475	1.298	0.86	1.298
0.294	1.293	0.542	1.293	0.851	1.293
0.2905	1.288	0.5355	1.288	0.843	1.288
0.28695	1.283	0.5295	1.283	0.833	1.283
0.28335	1.278	0.5235	1.278	0.8245	1.278
0.27985	1.273	0.5175	1.273	0.816	1.273
0.27635	1.268	0.5115	1.268	0.8065	1.268
0.2728	1.263	0.506	1.263	0.798	1.263
0.26935	1.258	0.4996	1.258	0.79	1.258
0.26585	1.253	0.4938	1.253	0.7805	1.253
0.26235	1.248	0.4881	1.248	0.7715	1.248
0.25895	1.243	0.4819	1.243	0.7635	1.243
0.2555	1.238	0.47615	1.238	0.7545	1.238
0.25205	1.233	0.4705	1.233	0.7455	1.233
0.24865	1.228	0.4644	1.228	0.7375	1.228
0.24525	1.223	0.45875	1.223	0.729	1.223
0.2418	1.218	0.4531	1.218	0.7195	1.218
0.2385	1.213	0.44705	1.213	0.7115	1.213
0.2351	1.208	0.44155	1.208	0.7035	1.208
0.23175	1.203	0.43585	1.203	0.694	1.203
0.22845	1.198	0.42995	1.198	0.686	1.198
0.2251	1.193	0.4245	1.193	0.678	1.193
0.22175	1.188	0.41885	1.188	0.669	1.188
0.2185	1.183	0.41295	1.183	0.6605	1.183
0.2152	1.178	0.40755	1.178	0.653	1.178
0.2119	1.173	0.402	1.173	0.644	1.173
0.2087	1.168	0.39615	1.168	0.6355	1.168
0.20545	1.163	0.3908	1.163	0.628	1.163
0.20215	1.158	0.38535	1.158	0.619	1.158
0.19875	1.153	0.3795	1.153	0.6105	1.153
0.19555	1.148	0.37425	1.148	0.6035	1.148
0.19235	1.143	0.36875	1.143	0.5945	1.143
0.18925	1.138	0.3631	1.138	0.586	1.138
0.1861	1.133	0.35795	1.133	0.5785	1.133
0.1829	1.128	0.35245	1.128	0.5705	1.128
0.1798	1.123	0.3468	1.123	0.5615	1.123
0.1767	1.118	0.34175	1.118	0.5545	1.118
0.17355	1.113	0.3364	1.113	0.5465	1.113
0.17055	1.108	0.3308	1.108	0.5375	1.108
0.16745	1.103	0.3257	1.103	0.53	1.103
0.1644	1.098	0.32055	1.098	0.523	1.098
0.1614	1.093	0.31495	1.093	0.514	1.093
0.15835	1.088	0.30995	1.088	0.5065	1.088
0.15535	1.083	0.30485	1.083	0.4993	1.083
0.1524	1.078	0.2993	1.078	0.4906	1.078
0.1494	1.073	0.2944	1.073	0.483	1.073
0.14645	1.068	0.28935	1.068	0.47605	1.068
0.1436	1.063	0.2839	1.063	0.46735	1.063
0.1406	1.058	0.27905	1.058	0.46005	1.058
0.1377	1.053	0.2741	1.053	0.4531	1.053
0.1349	1.048	0.2687	1.048	0.4445	1.048
0.13195	1.043	0.26395	1.043	0.4369	1.043
0.12915	1.038	0.259	1.038	0.4302	1.038
0.12635	1.033	0.25375	1.033	0.4226	1.033
0.1235	1.028	0.2491	1.028	0.4143	1.028
0.12075	1.023	0.2442	1.023	0.4076	1.023
0.11805	1.018	0.239	1.018	0.4004	1.018
0.1152	1.013	0.23445	1.013	0.39205	1.013
0.11255	1.008	0.22965	1.008	0.3853	1.008
0.1099	1.003	0.22455	1.003	0.3786	1.003
0.1071	0.998	0.22	0.998	0.3703	0.998
0.10455	0.9931	0.21535	0.9931	0.36335	0.9931
0.1019	0.9881	0.2103	0.9881	0.35695	0.9881
0.09925	0.9831	0.2059	0.9831	0.3489	0.9831
0.0967	0.9781	0.2013	0.9781	0.342	0.9781
0.09415	0.9731	0.19615	0.9731	0.33565	0.9731
0.09155	0.9681	0.1919	0.9681	0.3276	0.9681
0.0891	0.9631	0.18735	0.9631	0.32115	0.9631
0.0866	0.9581	0.18255	0.9581	0.3147	0.9581
0.08405	0.9531	0.17835	0.9531	0.30685	0.9531
0.0817	0.9481	0.17395	0.9481	0.30045	0.9481
0.0793	0.9431	0.1692	0.9431	0.29415	0.9431
0.07685	0.9381	0.1651	0.9381	0.28645	0.9381
0.07455	0.9331	0.1608	0.9331	0.2801	0.9331
0.0723	0.9282	0.1562	0.9282	0.27415	0.9282
0.0699	0.9232	0.15225	0.9232	0.26655	0.9232
0.06765	0.9181	0.148	0.9181	0.2603	0.9181
0.0655	0.9132	0.14355	0.9132	0.2545	0.9132
0.0632	0.9081	0.13975	0.9081	0.2472	0.9081
0.06105	0.9032	0.1355	0.9032	0.24075	0.9032
0.05895	0.8981	0.1313	0.8981	0.2353	0.8981
0.05675	0.8932	0.1276	0.8932	0.22845	0.8932
0.05475	0.8882	0.12345	0.8882	0.22185	0.8882
0.05275	0.8832	0.1194	0.8832	0.21655	0.8832
0.05065	0.8782	0.11585	0.8782	0.20975	0.8782
0.04873	0.8732	0.11185	0.8732	0.2037	0.8732
0.04684	0.8682	0.1079	0.8682	0.1985	0.8682
0.04485	0.8632	0.1045	0.8632	0.19155	0.8632
0.04306	0.8582	0.10065	0.8582	0.18595	0.8582
0.04128	0.8532	0.0969	0.8532	0.18085	0.8532
0.03941	0.8482	0.09365	0.8482	0.17425	0.8482
0.03772	0.8432	0.0899	0.8432	0.1687	0.8432
0.03606	0.8382	0.08645	0.8382	0.1639	0.8382
0.03432	0.8332	0.08335	0.8332	0.1577	0.8332
0.03279	0.8282	0.07965	0.8282	0.1522	0.8282
0.03123	0.8232	0.07645	0.8232	0.14765	0.8232
0.02962	0.8182	0.0735	0.8182	0.1417	0.8182
0.02822	0.8132	0.07005	0.8132	0.1364	0.8132
0.02678	0.8082	0.067	0.8082	0.13205	0.8082
0.02532	0.8033	0.0642	0.8033	0.1265	0.8033
0.02402	0.7982	0.06095	0.7982	0.12125	0.7982
0.02277	0.7932	0.05815	0.7932	0.1171	0.7932
0.02142	0.7882	0.05555	0.7882	0.11205	0.7882
0.02026	0.7832	0.0525	0.7832	0.10695	0.7832
0.01914	0.7783	0.04994	0.7783	0.1031	0.7783
0.01795	0.7732	0.04752	0.7732	0.09835	0.7732
0.01694	0.7682	0.04472	0.7682	0.09365	0.7682
0.01597	0.7632	0.0424	0.7632	0.09005	0.7632
0.01493	0.7582	0.04019	0.7582	0.08545	0.7582
0.01406	0.7532	0.03766	0.7532	0.08115	0.7532
0.01323	0.7482	0.03557	0.7482	0.0778	0.7482
0.01234	0.7433	0.03357	0.7433	0.07365	0.7433
0.01161	0.7382	0.03132	0.7382	0.06965	0.7382
0.01089	0.7333	0.02948	0.7333	0.06665	0.7333
0.01014	0.7283	0.02768	0.7283	0.0628	0.7283
0.00954	0.7233	0.02573	0.7233	0.0592	0.7233
0.00896	0.7183	0.02416	0.7183	0.0564	0.7183
0.00834	0.7132	0.02256	0.7132	0.053	0.7132
0.00784	0.7083	0.0209	0.7083	0.04969	0.7083
0.00742	0.7032	0.01958	0.7032	0.04718	0.7032
0.00695	0.6983	0.01823	0.6983	0.0442	0.6983
0.00657	0.6933	0.01683	0.6933	0.04125	0.6933
0.00627	0.6883	0.01574	0.6883	0.03906	0.6883
0.00597	0.6833	0.01464	0.6833	0.03649	0.6833
0.00568	0.6783	0.01348	0.6783	0.03388	0.6783
0.00549	0.6733	0.01259	0.6733	0.03196	0.6733
0.0053	0.6683	0.01175	0.6683	0.02971	0.6683
0.00513	0.6633	0.0108	0.6633	0.02751	0.6633
0.00502	0.6583	0.01008	0.6583	0.02586	0.6583
0.00492	0.6533	0.00944	0.6533	0.02394	0.6533
0.00482	0.6484	0.0087	0.6484	0.02207	0.6484
0.00476	0.6433	0.00809	0.6433	0.02068	0.6433
0.00471	0.6383	0.00762	0.6383	0.01915	0.6383
0.00466	0.6333	0.0071	0.6333	0.01754	0.6333
0.00464	0.6283	0.0066	0.6283	0.01639	0.6283
0.00461	0.6234	0.00626	0.6234	0.01514	0.6234
0.00459	0.6184	0.00589	0.6184	0.01385	0.6184
0.00458	0.6133	0.00553	0.6133	0.01289	0.6133
0.00458	0.6084	0.0053	0.6084	0.01193	0.6084
0.00457	0.6034	0.00505	0.6034	0.01089	0.6034
0.00456	0.5983	0.00481	0.5983	0.01013	0.5983
0.00456	0.5934	0.00467	0.5934	0.00937	0.5934
0.00457	0.5883	0.00454	0.5883	0.00857	0.5883
0.00456	0.5833	0.00439	0.5833	0.00799	0.5833
0.00456	0.5784	0.00432	0.5784	0.00742	0.5784
0.00457	0.5734	0.00427	0.5734	0.00681	0.5734
0.00455	0.5684	0.00418	0.5684	0.00637	0.5684
0.00456	0.5634	0.00415	0.5634	0.00596	0.5634
0.00456	0.5584	0.00414	0.5584	0.00552	0.5584
0.00455	0.5534	0.0041	0.5534	0.00524	0.5534
0.00455	0.5484	0.00409	0.5484	0.00494	0.5484
0.00455	0.5434	0.0041	0.5434	0.00467	0.5434
0.00453	0.5384	0.00409	0.5384	0.00451	0.5384
0.00453	0.5334	0.0041	0.5334	0.00432	0.5334
0.00454	0.5284	0.00411	0.5284	0.00417	0.5284
0.00451	0.5234	0.00411	0.5234	0.0041	0.5234
0.00451	0.5184	0.00412	0.5184	0.00401	0.5184
0.0045	0.5135	0.00414	0.5135	0.00393	0.5135
0.00448	0.5084	0.00415	0.5084	0.00392	0.5084
0.00448	0.5034	0.00416	0.5034	0.00387	0.5034
0.00446	0.4984	0.00417	0.4984	0.00384	0.4984
0.00444	0.4934	0.00418	0.4934	0.00385	0.4934
0.00444	0.4885	0.00418	0.4885	0.00384	0.4885
0.00442	0.4834	0.0042	0.4834	0.00383	0.4834
0.00439	0.4784	0.00421	0.4784	0.00385	0.4784
0.00439	0.4734	0.00421	0.4734	0.00385	0.4734
0.00437	0.4684	0.00421	0.4684	0.00386	0.4684
0.00434	0.4635	0.00422	0.4635	0.00389	0.4635
0.00434	0.4585	0.00422	0.4585	0.00389	0.4585
0.00432	0.4535	0.00421	0.4535	0.00391	0.4535
0.00429	0.4484	0.00422	0.4484	0.00393	0.4484
0.00429	0.4434	0.00422	0.4434	0.00394	0.4434
0.00427	0.4384	0.00421	0.4384	0.00395	0.4384
0.00425	0.4334	0.00422	0.4334	0.00397	0.4334
0.00425	0.4284	0.00421	0.4284	0.00398	0.4284
0.00422	0.4235	0.0042	0.4235	0.00399	0.4235
0.00421	0.4184	0.00421	0.4184	0.004	0.4184
0.00421	0.4134	0.0042	0.4134	0.00401	0.4134
0.00418	0.4085	0.00419	0.4085	0.00401	0.4085
0.00417	0.4035	0.0042	0.4035	0.00402	0.4035
0.00417	0.3985	0.00418	0.3985	0.00403	0.3985
0.00414	0.3935	0.00418	0.3935	0.00403	0.3935
0.00414	0.3885	0.00418	0.3885	0.00403	0.3885
0.00413	0.3834	0.00416	0.3834	0.00405	0.3834
0.0041	0.3785	0.00416	0.3785	0.00404	0.3785
0.0041	0.3735	0.00416	0.3735	0.00404	0.3735
0.00409	0.3685	0.00414	0.3685	0.00406	0.3685
0.00406	0.3636	0.00413	0.3636	0.00405	0.3636
0.00406	0.3586	0.00414	0.3586	0.00404	0.3586
0.00404	0.3535	0.00412	0.3535	0.00405	0.3535
0.00402	0.3485	0.00411	0.3485	0.00404	0.3485
0.00401	0.3435	0.00412	0.3435	0.00403	0.3435
0.00398	0.3385	0.0041	0.3385	0.00404	0.3385
0.00396	0.3335	0.00408	0.3335	0.00402	0.3335
0.00394	0.3285	0.00409	0.3285	0.00401	0.3285
0.0039	0.3235	0.00406	0.3235	0.00402	0.3235
0.00388	0.3186	0.00404	0.3186	0.00399	0.3186
0.00385	0.3136	0.00404	0.3136	0.00397	0.3136
0.0038	0.3086	0.004	0.3086	0.00398	0.3086
0.00377	0.3035	0.00397	0.3035	0.00394	0.3035
0.00372	0.2985	0.00396	0.2985	0.00392	0.2985
0.00366	0.2936	0.00391	0.2936	0.0039	0.2936
0.00362	0.2886	0.00387	0.2886	0.00384	0.2886
0.00355	0.2836	0.00385	0.2836	0.00382	0.2836
0.00348	0.2786	0.00377	0.2786	0.00378	0.2786
0.00343	0.2736	0.00372	0.2736	0.00369	0.2736
0.00334	0.2686	0.00366	0.2686	0.00365	0.2686
0.00326	0.2635	0.00356	0.2635	0.00359	0.2635
0.00318	0.2586	0.00348	0.2586	0.00346	0.2586
0.00307	0.2536	0.00339	0.2536	0.00337	0.2536
0.00299	0.2486	0.00326	0.2486	0.00326	0.2486
0.00288	0.2436	0.00315	0.2436	0.00308	0.2436
0.00274	0.2386	0.00302	0.2386	0.00295	0.2386
0.00264	0.2336	0.00283	0.2336	0.00276	0.2336
0.00249	0.2286	0.00268	0.2286	0.0025	0.2286
0.00234	0.2236	0.00249	0.2236	0.0023	0.2236
0.00221	0.2186	0.00225	0.2186	0.00201	0.2186
0.00202	0.2136	0.00204	0.2136	0.00165	0.2136
0.00183	0.2086	0.00178	0.2086	0.00136	0.2086
0.00166	0.2036	0.00146	0.2036	0.000928	0.2036
0.00141	0.1986	0.00118	0.1986	0.0004428	0.1986

## Sheet: 1.5 V EIS
750 °C		800 °C		850 °C
Z'	-Z"	Z'	-Z"	Z'	-Z"
0.916	-1.2444	0.6166	-1.2594	0.45	-1.2674
0.9186	-0.9804	0.615	-0.9972	0.4438	-1.001
0.9214	-0.775	0.6166	-0.7884	0.4404	-0.7994
0.9222	-0.6162	0.6148	-0.6284	0.4404	-0.6336
0.9252	-0.4854	0.6142	-0.4984	0.4398	-0.5042
0.9264	-0.3834	0.6142	-0.3954	0.4376	-0.3994
0.929	-0.3024	0.6144	-0.314	0.4376	-0.3184
0.9308	-0.239	0.617	-0.2502	0.437	-0.2522
0.9318	-0.18846	0.6146	-0.19644	0.4364	-0.2008
0.933	-0.14834	0.6148	-0.15562	0.4352	-0.16016
0.933	-0.11648	0.616	-0.12328	0.4358	-0.12688
0.9346	-0.09024	0.6156	-0.09646	0.4346	-0.0995
0.9354	-0.06958	0.6162	-0.07418	0.4354	-0.07742
0.9372	-0.05316	0.6172	-0.05832	0.4362	-0.0612
0.9384	-0.0394	0.6178	-0.04556	0.4364	-0.04734
0.9404	-0.02774	0.6186	-0.03358	0.4376	-0.03718
0.9414	-0.01968	0.6198	-0.02464	0.4372	-0.02862
0.942	-0.011	0.6208	-0.01781	0.4384	-0.0205
0.9452	-0.00661	0.6198	-0.01104	0.4388	-0.01345
0.9456	-0.00227	0.6232	-0.00643	0.44	-0.00981
0.9492	0.00271	0.6264	-0.00356	0.4406	-0.00623
0.9494	0.0075	0.627	0.000731	0.4424	-0.00307
0.954	0.00987	0.6292	0.00391	0.4436	0.00131
0.9568	0.01234	0.6302	0.00603	0.4444	0.00152
0.9606	0.0155	0.6322	0.00754	0.4456	0.00295
0.963	0.01738	0.6342	0.00979	0.4468	0.00495
0.9664	0.01826	0.6372	0.01153	0.448	0.00584
0.9706	0.02122	0.6396	0.0124	0.4492	0.00711
0.9734	0.02372	0.642	0.01394	0.4508	0.00836
0.9768	0.02366	0.6438	0.01422	0.4522	0.00911
0.9804	0.02526	0.6462	0.01582	0.4536	0.00985
0.9848	0.02676	0.648	0.01584	0.4546	0.01069
0.9894	0.0267	0.6514	0.01735	0.4574	0.01161
0.9942	0.02804	0.6544	0.01839	0.4588	0.01256
0.998	0.02886	0.6562	0.01955	0.4604	0.01326
1.0014	0.02986	0.6596	0.0203	0.4622	0.01428
1.0054	0.03306	0.6626	0.02074	0.4654	0.01505
1.011	0.03286	0.6656	0.02278	0.4666	0.01578
1.015	0.03338	0.668	0.02478	0.47	0.017
1.0202	0.03592	0.6722	0.02576	0.4726	0.0185
1.0256	0.03824	0.6754	0.02748	0.4736	0.01968
1.0312	0.04038	0.681	0.0283	0.4782	0.01982
1.037	0.04212	0.686	0.02992	0.482	0.02166
1.0436	0.0461	0.6914	0.03168	0.483	0.02272
1.0496	0.04736	0.6946	0.03336	0.4846	0.02294
1.0558	0.05032	0.6992	0.03458	0.492	0.02592
1.0642	0.0532	0.708	0.03616	0.4952	0.02632
1.0714	0.0569	0.7136	0.03896	0.499	0.02658
1.0796	0.06002	0.7194	0.03952	0.5056	0.02528
1.0904	0.0639	0.723	0.03916	0.5088	0.0243
1.0996	0.06782	0.7328	0.036	0.5148	0.02186
1.1108	0.07264	0.7342	--	0.5188	0.01906
1.122	0.07688	0.7404	0.03286	0.5202	0.01626
1.1366	0.0765	0.7526	0.02886	0.5222	0.01302
1.1506	0.07786	0.7572	0.025	0.5234	0.01102
1.1642	0.07746	0.7608	0.02274	0.5246	0.00835
1.178	0.07612	0.7644	0.01918	0.5266	0.00675
1.1918	0.07254	0.7666	0.01562	0.5268	0.00452
1.204	0.06786	0.7682	0.0124	0.5272	0.00316
1.2154	0.0621	0.7698	0.00945	0.5276	0.00147
1.2258	0.05514	0.7706	0.00636	0.5276	-0.00019334
1.234	0.04746	0.7712	0.0038	0.5274	-0.00187
1.241	0.03996	0.7712	0.00132	0.527	-0.00336
1.2458	0.03252	0.771	-0.00109	0.526	-0.00485
1.2492	0.02534	0.77	-0.00326	0.525	-0.00611
1.2516	0.01937	0.769	-0.00497	0.5234	-0.0075
1.253	0.0141	0.7678	-0.00624	0.5216	-0.00829
1.2538	0.00993	0.7662	-0.00731	0.5198	-0.00876
1.2552	0.0071	0.7646	-0.00784	0.518	-0.00891
1.256	0.00456	0.7628	-0.00786	0.5168	-0.00883
1.2568	0.0033	0.7614	-0.00768	0.5152	-0.0084
