# Supplementary material
Source: Royal Society of Chemistry journal article supplement (doi:10.1039/d5ta09732k)
Supplement: d5ta09732k8.pdf [file d5ta09732k8.pdf]

## **Boosting CO<sub>2</sub> Electrolysis via a Metal-Free F/Gd Co-doped CeO<sub>2</sub> Cathode for Solid Oxide Electrolysis Cells**

Shiwei Yang<sup>a</sup>, Caichen Yang<sup>a</sup>, Shuidan Gu<sup>a</sup>, Yunfeng Tian<sup>b\*</sup>, Kaisheng Xia<sup>b</sup>, Jian Pu<sup>a</sup>, Bo  
Chi<sup>a\*</sup>

a. School of Materials Science and Engineering, Huazhong University of Science and  
Technology, Wuhan 430074, China

b. Faculty of Materials Science and Chemistry, China University of Geosciences, Wuhan  
430078, China

---

\* Corresponding authors. Email: [chibo@hust.edu.cn](mailto:chibo@hust.edu.cn) (B Chi); [yunfengup@cug.edu.cn](mailto:yunfengup@cug.edu.cn) (Y Tian)

**Table S1.** The fitting data of XPS O 1s for FxGDC powders.

| <b>Relative concentration</b> |                          | <b>GDC</b>   | <b>F<sub>0.05</sub>GDC</b> | <b>F<sub>0.1</sub>GDC</b> | <b>F<sub>0.15</sub>GDC</b> |
|-------------------------------|--------------------------|--------------|----------------------------|---------------------------|----------------------------|
|                               | <b>O<sub>L</sub> (%)</b> | <b>77.5</b>  | <b>74.18</b>               | <b>71.59</b>              | <b>78.55</b>               |
| <b>O 1s</b>                   | <b>O<sub>S</sub> (%)</b> | <b>15.81</b> | <b>21.6</b>                | <b>25.01</b>              | <b>16.01</b>               |
|                               | <b>-OH (%)</b>           | <b>6.69</b>  | <b>4.22</b>                | <b>3.4</b>                | <b>5.44</b>                |

**Table S2.** The fitting data of XPS Ce 3d for FxGDC powders.

| <b>Relative concentration</b> |                            | <b>GDC</b>   | <b>F<sub>0.05</sub>GDC</b> | <b>F<sub>0.1</sub>GDC</b> | <b>F<sub>0.15</sub>GDC</b> |
|-------------------------------|----------------------------|--------------|----------------------------|---------------------------|----------------------------|
| <b>Ce 3d</b>                  | <b>Ce<sup>3+</sup> (%)</b> | <b>11.26</b> | <b>15.15</b>               | <b>16.7</b>               | <b>15.14</b>               |
|                               | <b>Ce<sup>4+</sup> (%)</b> | <b>88.74</b> | <b>84.85</b>               | <b>83.3</b>               | <b>84.86</b>               |
| <b>Average valence</b>        |                            | <b>3.887</b> | <b>3.849</b>               | <b>3.833</b>              | <b>3.849</b>               |

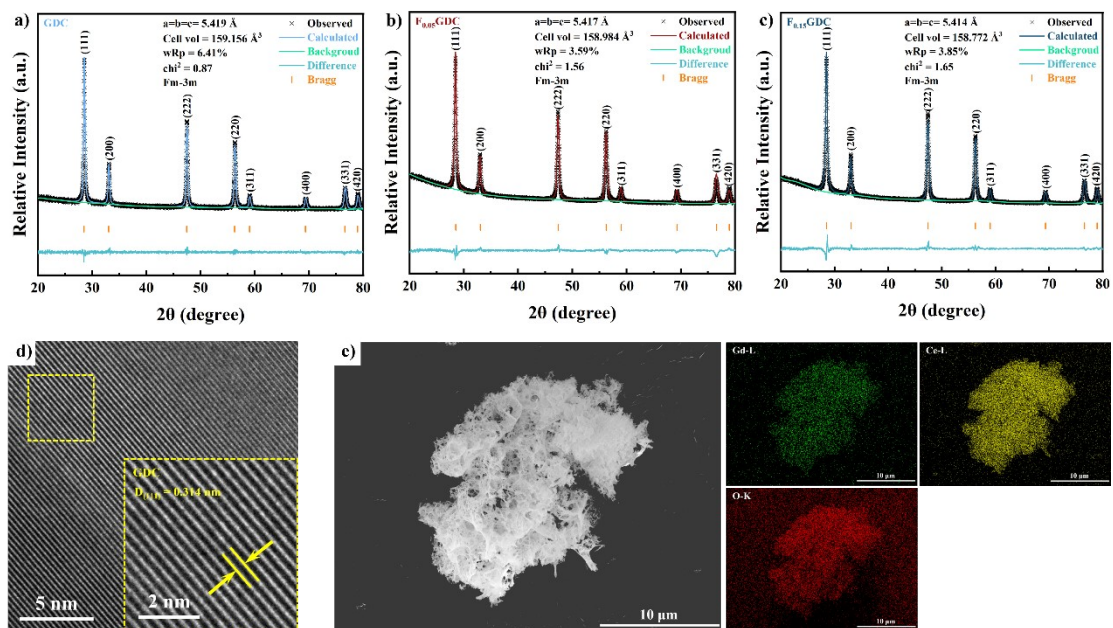

**Figure S1.** Rietveld refinement of the XRD pattern of (a) GDC; (b)  $F_{0.05}GDC$ ; (c)  $F_{0.15}GDC$ ; (d) TEM image of  $F_{0.1}GDC$ ; (e) EDS spectrum of GDC.

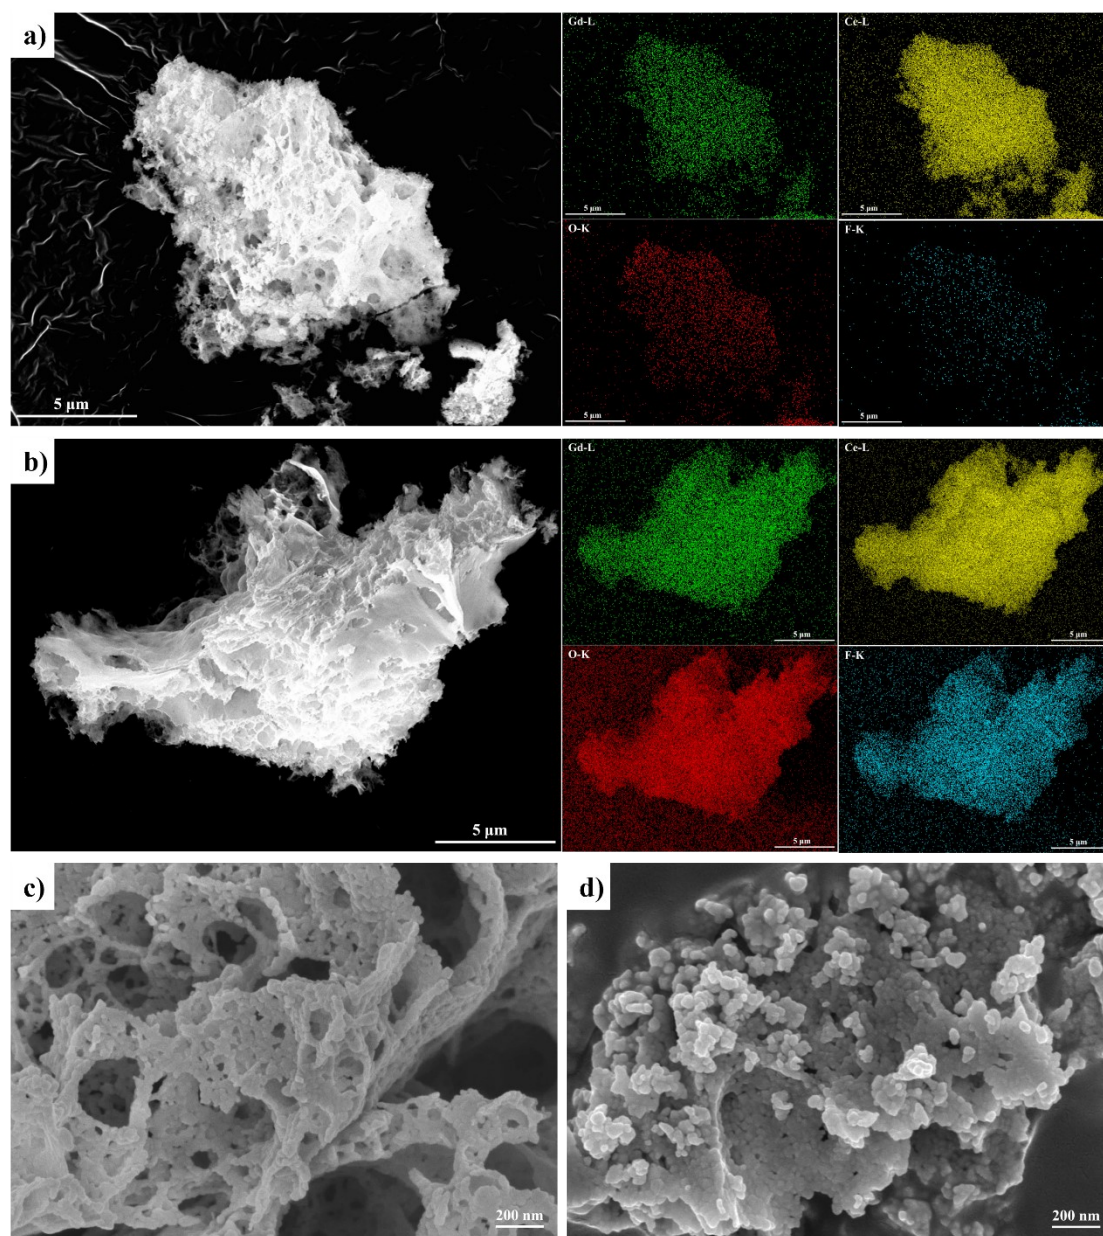

**Figure S2.** EDS spectrum of (a)  $F_{0.05}GDC$ ; (b)  $F_{0.15}GDC$ ; SEM image of (a) GDC powder; (b)  $F_{0.1}GDC$  powder.

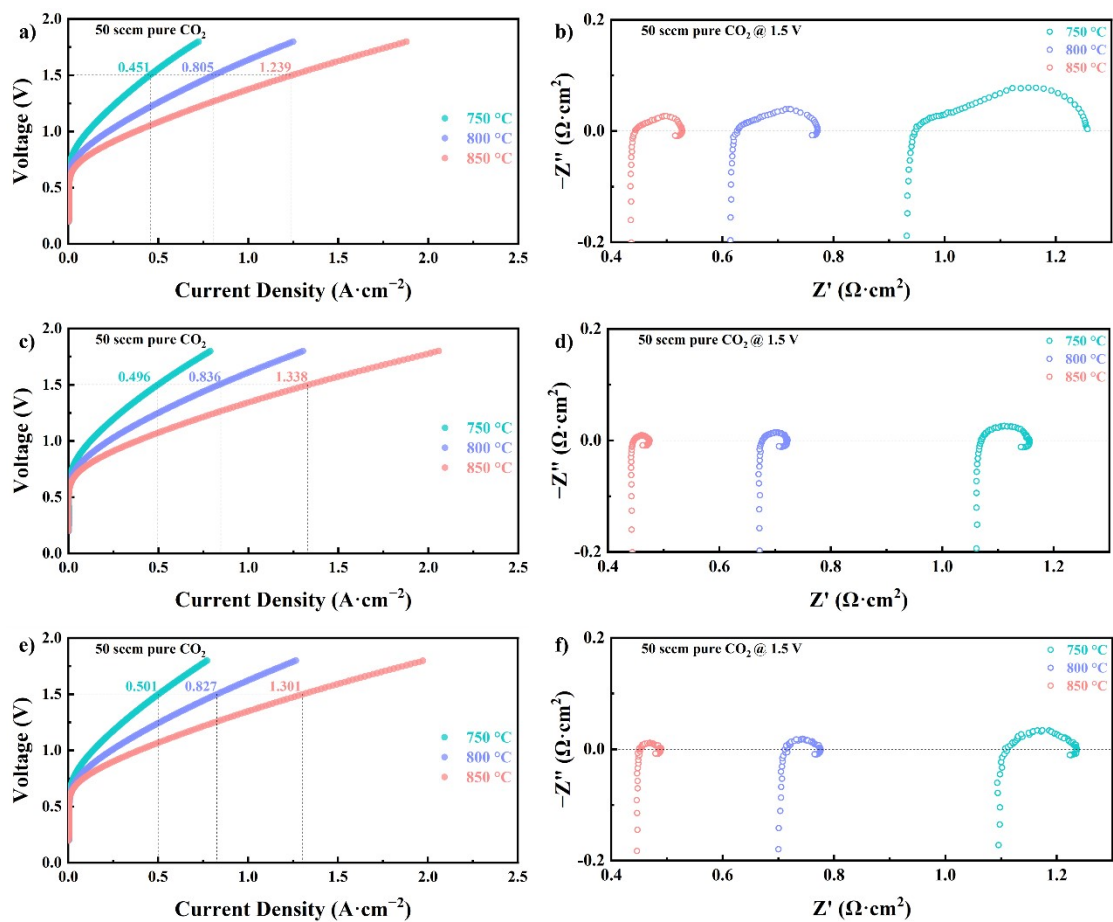

**Figure S3.** Electrochemical performance of cells with GDC, F<sub>0.05</sub>GDC and F<sub>0.15</sub>GDC as fuel electrode at different temperatures and applied voltage (a) I-V curves of GDC cell; (b) Impedance at different temperature at 1.5 V of GDC cell; (c) I-V curves of F<sub>0.05</sub>GDC cell; (d) Impedance at different temperature at 1.5 V of F<sub>0.05</sub>GDC cell; (e) I-V curves of F<sub>0.15</sub>GDC cell; (f) Impedance at different temperature at 1.5 V of F<sub>0.15</sub>GDC cell.

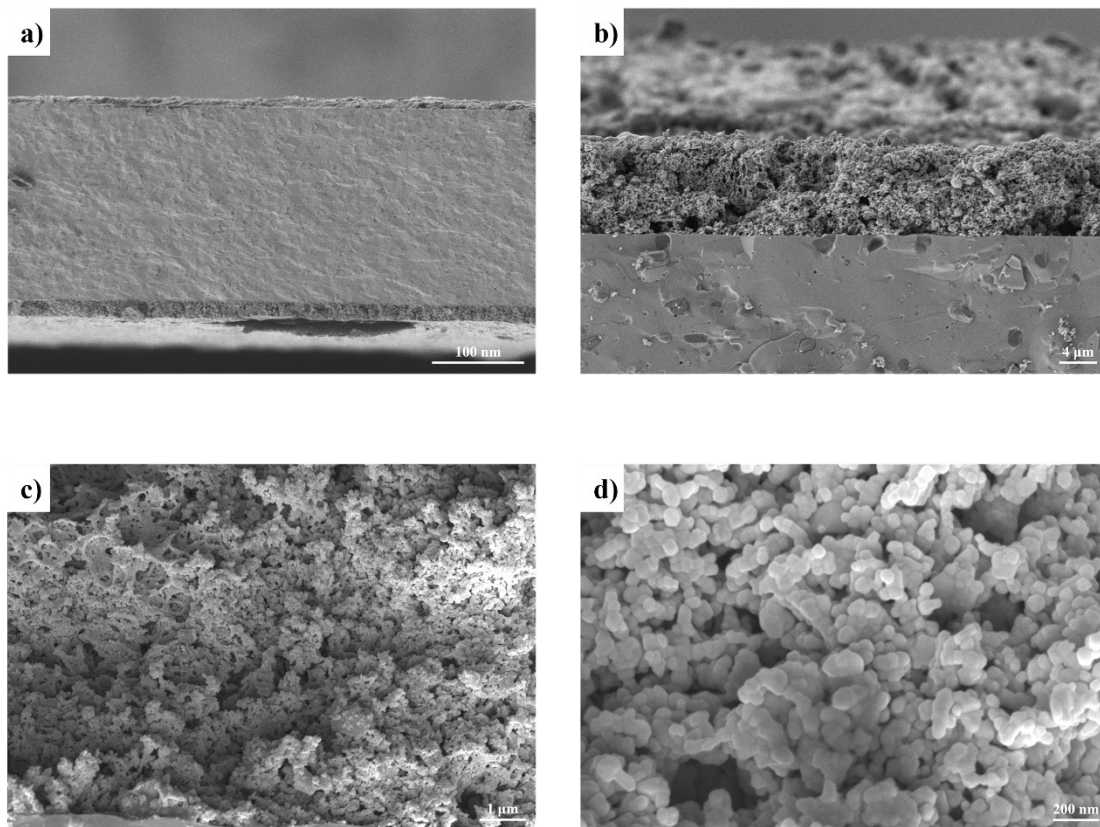

**Figure S4.** SEM images of the cell with  $F_{0.1}GDC$  as fuel electrode after long term test. (a) SEM image of the entire cell. (b) SEM image of the  $F_{0.1}GDC$  fuel electrode. (c) Amplification of the  $F_{0.1}GDC$  fuel electrode. (d) Further amplification of the  $F_{0.1}GDC$  fuel electrode

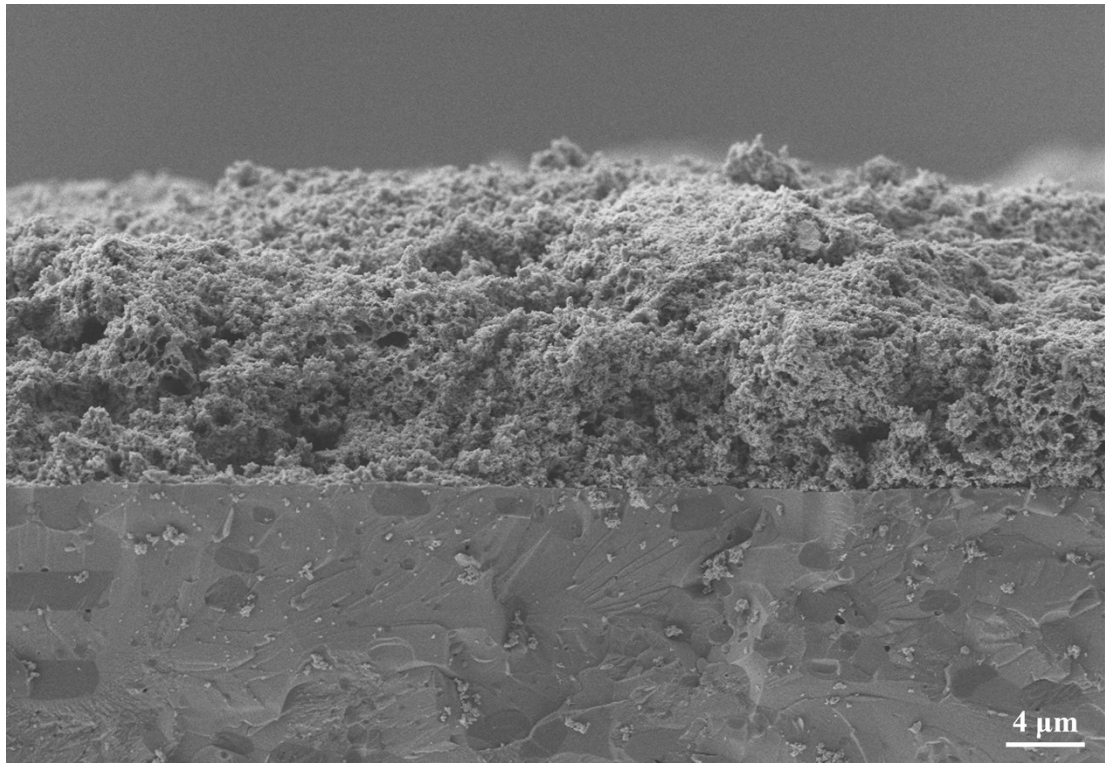

**Figure S5.** SEM images of the pristine cell with F<sub>0.1</sub>GDC as fuel electrode
