# Supplementary material
Source: Royal Society of Chemistry journal article supplement (doi:10.1039/d5ta09732k)
Supplement: d5ta09732k9.xlsx [file d5ta09732k9.xlsx]

## Sheet: O-XPS
GDC			F0.05GDC			F0.1GDC			F0.15GDC
Binding Energy	Intensity		Binding Energy	Intensity		Binding Energy	Intensity		Binding Energy	Intensity
544.38	41276.7		544.98	53561.5		544.98	39367.9		544.68	58554.8
544.28	41799.7		544.88	53601.9		544.88	39438.4		544.58	58270
544.18	42241.9		544.78	53289.1		544.78	39749.9		544.48	58288.8
544.08	42764.1		544.68	53376.3		544.68	39942.4		544.38	59306.2
543.98	41659		544.58	53773.5		544.58	39941.5		544.28	58926.2
543.88	42181.2		544.48	53770.5		544.48	39954.6		544.18	58656.8
543.78	42671		544.38	53556.5		544.38	40136.3		544.08	58843.9
543.68	42860.4		544.28	53734.9		544.28	39764.3		543.98	59458.6
543.58	42521.2		544.18	53690.4		544.18	39620.6		543.88	59081
543.48	42474.5		544.08	53793		544.08	39797.5		543.78	58852.1
543.38	42307.3		543.98	53722.7		543.98	40135.1		543.68	59566.8
543.28	41964.4		543.88	53658.3		543.88	40464.7		543.58	60044.9
543.18	42108		543.78	54147		543.78	40711.5		543.48	60653.1
543.08	42229.9		543.68	54165.6		543.68	40704.5		543.38	59441.2
542.98	42256.4		543.58	54385.8		543.58	41102.2		543.28	59941.8
542.88	41854.3		543.48	54844.7		543.48	41115.2		543.18	59690.5
542.78	42083.7		543.38	54576.5		543.38	40811.7		543.08	59469.8
542.68	42395.9		543.28	54213.5		543.28	40859		542.98	60220
542.58	41357.3		543.18	54377.3		543.18	41009.5		542.88	59950.7
542.48	41707.9		543.08	55178.4		543.08	40732		542.78	59832.6
542.38	41344.5		542.98	55120.1		542.98	40584.6		542.68	59087.9
542.28	40678.3		542.88	54302.1		542.88	40544.5		542.58	59381.3
542.18	40771.4		542.78	54961.2		542.78	40431.4		542.48	59401.3
542.08	39883.7		542.68	55369.4		542.68	40802.8		542.38	58516.1
541.98	40610.3		542.58	54792		542.58	40799.8		542.28	58396.6
541.88	40117		542.48	54234.3		542.48	40635		542.18	58167.7
541.78	39540.7		542.38	54281		542.38	40051.1		542.08	58039.6
541.68	39397.7		542.28	54369.7		542.28	39509.5		541.98	57884.8
541.58	39691.4		542.18	53801.7		542.18	39439.6		541.88	56955.8
541.48	38529.7		542.08	53228.6		542.08	39403.5		541.78	56766.7
541.38	38089.6		541.98	52937.4		541.98	39084.1		541.68	56250.1
541.28	38291.6		541.88	52324.1		541.88	38229.2		541.58	55320.5
541.18	37960.8		541.78	51820		541.78	37953.9		541.48	54898
541.08	37968.8		541.68	51687.6		541.68	38015.8		541.38	55085.1
540.98	39445.3		541.58	51342.1		541.58	37757.3		541.28	55153
540.88	37834		541.48	51208.8		541.48	37461.4		541.18	54977.6
540.78	37878.7		541.38	50774.3		541.38	37265		541.08	54037.3
540.68	37744.7		541.28	49597.1		541.28	37154.2		540.98	53707.2
540.58	38101.5		541.18	49753.1		541.18	36570.1		540.88	53290.1
540.48	37557.4		541.08	49493.4		541.08	36305.6		540.78	53467.5
540.38	37175.6		540.98	49427.5		540.98	36277.1		540.68	53686.1
540.28	37509.3		540.88	49151.5		540.88	36515		540.58	53348
540.18	37418.2		540.78	49233		540.78	36795.8		540.48	53440.7
540.08	36951.3		540.68	49369.1		540.68	36618.1		540.38	53595.9
539.98	37202.5		540.58	49255.4		540.58	36371.1		540.28	53171.4
539.88	37104.3		540.48	48974.6		540.48	36163.7		540.18	52715.5
539.78	36740.9		540.38	48862.3		540.38	35959.1		540.08	53331.3
539.68	36068.4		540.28	49022.1		540.28	35775.9		539.98	52169.3
539.58	36530.1		540.18	48858.8		540.18	36276.8		539.88	52710.1
539.48	36074.9		540.08	48715.5		540.08	36230		539.78	52071.7
539.38	35909.5		539.98	48307.3		539.98	35910.4		539.68	52390
539.28	35237.9		539.88	48419.8		539.88	35680.7		539.58	51663.6
539.18	34660.5		539.78	48553.8		539.78	35807.4		539.48	50916
539.08	35235.7		539.68	48651.6		539.68	35738.1		539.38	50873.1
538.98	34708		539.58	48048.3		539.58	35544.9		539.28	50487
538.88	34248.1		539.48	48041.5		539.48	35209.3		539.18	50596.5
538.78	34033.4		539.38	47399		539.38	35147.3		539.08	49705.8
538.68	34268		539.28	47083.8		539.28	35170.6		538.98	49236.6
538.58	34337.3		539.18	46298.2		539.18	34769.6		538.88	48938.5
538.48	33860.1		539.08	45887.3		539.08	34335.9		538.78	48846.2
538.38	33503.1		538.98	46173.7		538.98	34198.8		538.68	48159.1
538.28	33442.2		538.88	45786		538.88	33937.4		538.58	48250
538.18	32981		538.78	45682.6		538.78	33625		538.48	47407.3
538.08	33879.8		538.68	45433.3		538.68	33041.3		538.38	47513.1
537.98	33353.8		538.58	45073.1		538.58	32778.8		538.28	47082.2
537.88	33209.1		538.48	45101.6		538.48	32591.7		538.18	47210.1
537.78	33238.1		538.38	44577.5		538.38	32446.9		538.08	46229.7
537.68	32789.8		538.28	44198.1		538.28	32602.6		537.98	46252.3
537.58	33038.5		538.18	43771.3		538.18	32467.6		537.88	46081.7
537.48	33042.6		538.08	43757.6		538.08	32377.3		537.78	46209.2
537.38	32586.3		537.98	43290.6		537.98	32031.9		537.68	45515.4
537.28	32997		537.88	43344.1		537.88	31823.7		537.58	45587.2
537.18	32973.5		537.78	42938.7		537.78	31812.5		537.48	45964.4
537.08	32464.1		537.68	43345.8		537.68	32003.3		537.38	45400.9
536.98	33091.2		537.58	42784.8		537.58	31909		537.28	45649.3
536.88	33123.5		537.48	43028.4		537.48	31823.6		537.18	45884.1
536.78	33134.4		537.38	42479.9		537.38	31693.4		537.08	45575.4
536.68	33146.5		537.28	42816.5		537.28	31614.2		536.98	45406.4
536.58	33252.8		537.18	42641.2		537.18	31785.2		536.88	45855.3
536.48	32747.8		537.08	42273.5		537.08	31993.3		536.78	45292.1
536.38	32663.5		536.98	42719.4		536.98	31790.2		536.68	46295.7
536.28	32824.5		536.88	42775.8		536.88	31853.2		536.58	46001.1
536.18	32874.2		536.78	43255.3		536.78	32110.5		536.48	45546.7
536.08	33178.6		536.68	42775.7		536.68	32079.6		536.38	45902.3
535.98	33506		536.58	42532.9		536.58	32167		536.28	45707.1
535.88	33599.2		536.48	42985		536.48	32010		536.18	45646.3
535.78	33410.1		536.38	43108.6		536.38	31813.4		536.08	45718.1
535.68	33823.4		536.28	43434.7		536.28	31735.8		535.98	45774.7
535.58	34260.8		536.18	43060.5		536.18	32003.4		535.88	45546.9
535.48	34107.5		536.08	43398.3		536.08	32065.7		535.78	46057.8
535.38	34547.3		535.98	42572.2		535.98	31907.8		535.68	47251.8
535.28	34891.5		535.88	43097.8		535.88	32326.3		535.58	46519
535.18	34516.9		535.78	43104.1		535.78	32438.7		535.48	46420.8
535.08	34969.1		535.68	43106.2		535.68	32359		535.38	47118.2
534.98	35598.3		535.58	43563.2		535.58	32473.7		535.28	46934.6
534.88	36364.1		535.48	43971.9		535.48	33045.4		535.18	47545.5
534.78	35272.1		535.38	43803		535.38	33527.3		535.08	47101.9
534.68	36356.6		535.28	44309		535.28	32931.8		534.98	47859.6
534.58	36534.3		535.18	44174.8		535.18	33420.2		534.88	47881.9
534.48	37316.2		535.08	44184.4		535.08	33778.5		534.78	48203.3
534.38	37374.2		534.98	44595.9		534.98	33679.5		534.68	48268.3
534.28	37696.7		534.88	44784.6		534.88	34107.1		534.58	49213.4
534.18	38243.1		534.78	44799.4		534.78	34543.3		534.48	48917.5
534.08	38918		534.68	45414.2		534.68	34654		534.38	50535.7
533.98	39984.5		534.58	45628.2		534.58	35167.5		534.28	50826.2
533.88	40883.4		534.48	45694.1		534.48	35847		534.18	50680.1
533.78	40632.1		534.38	46714.4		534.38	36198.9		534.08	50839.5
533.68	41358.2		534.28	47263.2		534.28	36444.9		533.98	50844.2
533.58	42528.4		534.18	47828.6		534.18	37061.5		533.88	51595.1
533.48	43585.3		534.08	48181.1		534.08	37329.3		533.78	51656.9
533.38	43966.5		533.98	48795.5		533.98	37741.1		533.68	52592.7
533.28	44612.9		533.88	49089.3		533.88	38263.1		533.58	53661
533.18	46116.4		533.78	49398		533.78	38636.4		533.48	54662
533.08	47624		533.68	50452.1		533.68	39157.2		533.38	55483.4
532.98	48278.6		533.58	51204.6		533.58	39894.9		533.28	56669.3
532.88	48532.2		533.48	51778.4		533.48	40780.6		533.18	57417.1
532.78	50808.1		533.38	52422.2		533.38	41297.3		533.08	58933.6
532.68	52041.1		533.28	53026.5		533.28	41663.5		532.98	60739.9
532.58	52958.5		533.18	54077.1		533.18	42191.2		532.88	61740.3
532.48	54551.9		533.08	55501.9		533.08	43282.2		532.78	63334.6
532.38	55329.8		532.98	56370.9		532.98	44232		532.68	65243.1
532.28	55353.4		532.88	57847.4		532.88	45628.2		532.58	66915.3
532.18	57614.4		532.78	59780.8		532.78	47019.7		532.48	70244.9
532.08	57618.5		532.68	61441.5		532.68	48344.6		532.38	71143.3
531.98	57689.1		532.58	62903.3		532.58	49566.5		532.28	73303.7
531.88	57982.4		532.48	64409.3		532.48	50925.8		532.18	74857.9
531.78	59010.9		532.38	67023.3		532.38	52697.7		532.08	77731.4
531.68	58336.2		532.28	69255		532.28	54104.7		531.98	78730.8
531.58	57831.9		532.18	70955.2		532.18	54996.5		531.88	79096.5
531.48	57957		532.08	73037.1		532.08	56144.7		531.78	79628
531.38	56779.4		531.98	74087.7		531.98	57004.9		531.68	80873.9
531.28	56771.3		531.88	74980.6		531.88	57324.9		531.58	81631
531.18	57260.1		531.78	76300.4		531.78	58146.9		531.48	81014.8
531.08	56851.1		531.68	77034.1		531.68	58553.6		531.38	81578.6
530.98	58452.5		531.58	76924		531.58	58577.8		531.28	79788.1
530.88	59501.6		531.48	76113.8		531.48	58130.6		531.18	79006.3
530.78	61103.3		531.38	75124.4		531.38	57286		531.08	79241.9
530.68	63410.6		531.28	74474.9		531.28	56621.6		530.98	79141.4
530.58	65696.3		531.18	73193.3		531.18	56390.4		530.88	78076.7
530.48	70165.9		531.08	71400.5		531.08	55275.1		530.78	80050.7
530.38	75144.6		530.98	70333.8		530.98	54495.3		530.68	80630.4
530.28	80592.5		530.88	68756		530.88	53709.7		530.58	81326.8
530.18	86939		530.78	67463.3		530.78	53762.2		530.48	84283.4
530.08	93168.2		530.68	66933.7		530.68	53742.8		530.38	88503.3
529.98	99446.9		530.58	67119.7		530.58	53749.9		530.28	93866.4
529.88	106696		530.48	67138.1		530.48	54815.5		530.18	99616.3
529.78	111942		530.38	67433.8		530.38	56676.4		530.08	106982
529.68	116229		530.28	70138.9		530.28	59698.3		529.98	115837
529.58	120374		530.18	73784.3		530.18	63765.7		529.88	125255
529.48	123575		530.08	77808.7		530.08	68872.7		529.78	134602
529.38	124159		529.98	82837.4		529.98	75297.9		529.68	143466
529.28	124254		529.88	88890.1		529.88	82388.1		529.58	153885
529.18	123363		529.78	96997.8		529.78	89652.8		529.48	161467
529.08	121305		529.68	106877		529.68	97717		529.38	168378
528.98	118024		529.58	115340		529.58	106051		529.28	175282
528.88	113815		529.48	125481		529.48	113676		529.18	178531
528.78	108591		529.38	135882		529.38	119824		529.08	180459
528.68	103529		529.28	145198		529.28	124715		528.98	183104
528.58	97597.5		529.18	154637		529.18	129144		528.88	180217
528.48	91845.4		529.08	161368		529.08	131237		528.78	178236
528.38	85744.1		528.98	166271		528.98	130518		528.68	173589
528.28	77447.7		528.88	167559		528.88	128022		528.58	167914
528.18	70713.8		528.78	168927		528.78	124461		528.48	159115
528.08	65030.8		528.68	166679		528.68	117489		528.38	150511
527.98	59952.9		528.58	160945		528.58	108147		528.28	139976
527.88	54309		528.48	155796		528.48	99464		528.18	130417
527.78	48565.2		528.38	145901		528.38	90408.5		528.08	120455
527.68	45196.5		528.28	135821		528.28	81474		527.98	110039
527.58	42132.7		528.18	124810		528.18	72565.5		527.88	100083
527.48	39617.2		528.08	112502		528.08	64502.3		527.78	91330.6
527.38	37391.2		527.98	101595		527.98	57896.5		527.68	81920.5
527.28	36246.9		527.88	90594.5		527.88	51947.2		527.58	74309.5
527.18	34119.8		527.78	81459.2		527.78	47322.9		527.48	66721.4
527.08	33220.6		527.68	72912.1		527.68	43462.1		527.38	61683.1
526.98	32776.5		527.58	65484.6		527.58	40167.9		527.28	57678.7
526.88	31866.3		527.48	60252.6		527.48	37571.1		527.18	53375.1
526.78	31563.3		527.38	55107.6		527.38	35856.2		527.08	50789
526.68	31068		527.28	51608.7		527.28	34563.1		526.98	48149.4
526.58	31207.5		527.18	48190.8		527.18	33336.1		526.88	46606.6
526.48	30217.5		527.08	47125.8		527.08	32323.5		526.78	45304.9
526.38	30181.8		526.98	45119.5		526.98	31457.6		526.68	43418.6
526.28	29868.6		526.88	43633.4		526.88	30932.8		526.58	43844.6
526.18	30389.8		526.78	43091.2		526.78	30736.3		526.48	43474.8
526.08	30352.9		526.68	42230		526.68	30569.6		526.38	42174.6
525.98	29592.5		526.58	41167.5		526.58	30162.8		526.28	41970.5
525.88	29917.3		526.48	40815.5		526.48	29799.3		526.18	42519.1
525.78	29933.8		526.38	40494.8		526.38	29566.2		526.08	41369.6
525.68	29513		526.28	40056.9		526.28	29451.3		525.98	40907
525.58	29503.9		526.18	39895.9		526.18	29070.6		525.88	41428.8
525.48	29295.8		526.08	40063.8		526.08	29105.1		525.78	41301.9
525.38	29232.4		525.98	39610.4		525.98	28944.6		525.68	40634.7
525.28	29463		525.88	39638.6		525.88	28877		525.58	40857.2
525.18	29282.4		525.78	39180.3		525.78	28749.8		525.48	40522.8
525.08	28990.9		525.68	38935.4		525.68	28772.6		525.38	40665.5
524.98	28982.5		525.58	38772.4		525.58	28852.7		525.28	40385
524.88	29553.6		525.48	39341.9		525.48	28897.8		525.18	41212.9
524.78	29688.9		525.38	39180.5		525.38	28782.5		525.08	40277.9
524.68	29209.5		525.28	39559.5		525.28	28606.1		524.98	40451.7
524.58	29196.5		525.18	39715.4		525.18	28726.9		524.88	39989.8
524.48	29190.7		525.08	39473		525.08	28601.6		524.78	40155.7
524.38	29402.8		524.98	38994.8		524.98	28507.5		524.68	39828.3

## Sheet: Ce-XPS
GDC			F0.05GDC			F0.1GDC			F0.15GDC
Binding Energy	Intensity		Binding Energy	Intensity		Binding Energy	Intensity		Binding Energy	Intensity
929.38	202576		929.98	237635		929.98	188841		929.68	287607
929.28	203516		929.88	237692		929.88	188020		929.58	287567
929.18	202279		929.78	237991		929.78	187405		929.48	288464
929.08	201943		929.68	238034		929.68	187242		929.38	287921
928.98	202826		929.58	237657		929.58	187322		929.28	287693
928.88	202293		929.48	237911		929.48	187733		929.18	288081
928.78	202822		929.38	238855		929.38	187539		929.08	286764
928.68	202447		929.28	239043		929.28	187400		928.98	286809
928.58	201603		929.18	238343		929.18	187990		928.88	286507
928.48	200645		929.08	237757		929.08	187688		928.78	287121
928.38	201816		928.98	236227		928.98	186541		928.68	287518
928.28	201371		928.88	236447		928.88	187095		928.58	286007
928.18	201722		928.78	236813		928.78	187681		928.48	284972
928.08	200462		928.68	237122		928.68	187130		928.38	286515
927.98	200536		928.58	236133		928.58	186294		928.28	286984
927.88	200107		928.48	235673		928.48	186247		928.18	286299
927.78	200910		928.38	236384		928.38	185539		928.08	286123
927.68	199426		928.28	236207		928.28	185096		927.98	285182
927.58	201338		928.18	235479		928.18	185590		927.88	284356
927.48	199354		928.08	236258		928.08	185028		927.78	284203
927.38	199963		927.98	237144		927.98	184423		927.68	285261
927.28	199790		927.88	235721		927.88	184223		927.58	282564
927.18	198131		927.78	234831		927.78	184593		927.48	283215
927.08	199142		927.68	235473		927.68	184723		927.38	282602
926.98	199815		927.58	235449		927.58	184631		927.28	283624
926.88	199409		927.48	234540		927.48	184925		927.18	283514
926.78	199764		927.38	234879		927.38	184219		927.08	282542
926.68	199671		927.28	234335		927.28	183740		926.98	281459
926.58	198722		927.18	234469		927.18	184057		926.88	282294
926.48	198749		927.08	233528		927.08	184481		926.78	282111
926.38	198545		926.98	233389		926.98	183877		926.68	282243
926.28	198317		926.88	233690		926.88	183653		926.58	282656
926.18	198776		926.78	233955		926.78	183179		926.48	282118
926.08	198593		926.68	233240		926.68	183407		926.38	281084
925.98	199549		926.58	232287		926.58	183055		926.28	282659
925.88	199235		926.48	231695		926.48	182328		926.18	281264
925.78	196639		926.38	232476		926.38	182345		926.08	281828
925.68	198602		926.28	232720		926.28	182539		925.98	278966
925.58	197893		926.18	231171		926.18	183411		925.88	280389
925.48	198334		926.08	232319		926.08	183647		925.78	281091
925.38	196438		925.98	231739		925.98	182805		925.68	281816
925.28	198342		925.88	231556		925.88	183035		925.58	279982
925.18	198918		925.78	231223		925.78	183252		925.48	280041
925.08	197473		925.68	231595		925.68	182793		925.38	281651
924.98	197859		925.58	232373		925.58	182815		925.28	281936
924.88	199287		925.48	231159		925.48	183170		925.18	279702
924.78	197075		925.38	231598		925.38	183269		925.08	281349
924.68	198051		925.28	231708		925.28	182584		924.98	279854
924.58	198539		925.18	230839		925.18	182624		924.88	279950
924.48	198051		925.08	231168		925.08	182683		924.78	279165
924.38	198755		924.98	231399		924.98	182810		924.68	280148
924.28	197149		924.88	230796		924.88	181976		924.58	279475
924.18	197513		924.78	231648		924.78	182509		924.48	279129
924.08	197891		924.68	231717		924.68	182786		924.38	278871
923.98	198132		924.58	230711		924.58	182350		924.28	280875
923.88	198296		924.48	231146		924.48	182060		924.18	280545
923.78	196178		924.38	230167		924.38	182475		924.08	279936
923.68	197656		924.28	231132		924.28	183135		923.98	279316
923.58	196382		924.18	229504		924.18	182999		923.88	279984
923.48	197757		924.08	230304		924.08	182253		923.78	278538
923.38	197379		923.98	231035		923.98	182142		923.68	278722
923.28	196639		923.88	231767		923.88	182912		923.58	280532
923.18	196900		923.78	231295		923.78	182467		923.48	279829
923.08	197186		923.68	230618		923.68	181863		923.38	279750
922.98	196553		923.58	229850		923.58	182085		923.28	279405
922.88	197037		923.48	229598		923.48	182208		923.18	278318
922.78	198748		923.38	230771		923.38	182197		923.08	278946
922.68	196959		923.28	230573		923.28	181978		922.98	279745
922.58	198487		923.18	230259		923.18	182586		922.88	279905
922.48	196969		923.08	230710		923.08	181895		922.78	278495
922.38	197870		922.98	230164		922.98	181240		922.68	278807
922.28	196902		922.88	230592		922.88	181463		922.58	278180
922.18	196041		922.78	231227		922.78	181698		922.48	278750
922.08	197507		922.68	230332		922.68	181602		922.38	278580
921.98	197266		922.58	229816		922.58	181569		922.28	278669
921.88	197573		922.48	229968		922.48	181198		922.18	279231
921.78	196209		922.38	229651		922.38	181165		922.08	278314
921.68	196008		922.28	230303		922.28	181924		921.98	279181
921.58	197704		922.18	230489		922.18	181924		921.88	279733
921.48	197162		922.08	229940		922.08	182038		921.78	279022
921.38	196450		921.98	228889		921.98	182124		921.68	277673
921.28	197904		921.88	229984		921.88	182098		921.58	278795
921.18	197137		921.78	229548		921.78	182454		921.48	277693
921.08	196551		921.68	229337		921.68	181553		921.38	278531
920.98	198662		921.58	230187		921.58	180791		921.28	278018
920.88	197541		921.48	229659		921.48	181896		921.18	279703
920.78	198385		921.38	229778		921.38	182165		921.08	279536
920.68	198787		921.28	229039		921.28	181786		920.98	278496
920.58	197122		921.18	230140		921.18	181560		920.88	278705
920.48	198000		921.08	230983		921.08	181844		920.78	277934
920.38	197581		920.98	230149		920.98	181631		920.68	278180
920.28	197983		920.88	230015		920.88	181398		920.58	279175
920.18	199566		920.78	230048		920.78	181340		920.48	277356
920.08	198212		920.68	229519		920.68	182221		920.38	280231
919.98	199791		920.58	229981		920.58	181815		920.28	279727
919.88	199264		920.48	230448		920.48	181669		920.18	279125
919.78	201165		920.38	229806		920.38	182275		920.08	279062
919.68	200668		920.28	229429		920.28	182039		919.98	280666
919.58	200636		920.18	230554		920.18	181621		919.88	280455
919.48	202083		920.08	229910		920.08	181673		919.78	281239
919.38	203490		919.98	230117		919.98	181523		919.68	283204
919.28	205317		919.88	230527		919.88	182116		919.58	282818
919.18	205322		919.78	229271		919.78	183139		919.48	283270
919.08	207182		919.68	229655		919.68	183347		919.38	282289
918.98	207938		919.58	230771		919.58	183110		919.28	282012
918.88	208262		919.48	230526		919.48	183243		919.18	281541
918.78	211490		919.38	230776		919.38	184362		919.08	283204
918.68	213840		919.28	230751		919.28	185420		918.98	285882
918.58	216459		919.18	230994		919.18	186536		918.88	285988
918.48	218400		919.08	230609		919.08	186822		918.78	286293
918.38	219593		918.98	232538		918.98	187283		918.68	288379
918.28	223915		918.88	232915		918.88	188075		918.58	289473
918.18	227240		918.78	234430		918.78	188587		918.48	291688
918.08	229813		918.68	234653		918.68	189287		918.38	292510
917.98	231136		918.58	236016		918.58	191636		918.28	296012
917.88	234863		918.48	235724		918.48	193211		918.18	300854
917.78	238031		918.38	235723		918.38	194678		918.08	300750
917.68	240404		918.28	237228		918.28	196735		917.98	306260
917.58	241583		918.18	239895		918.18	199090		917.88	309628
917.48	242695		918.08	241682		918.08	201199		917.78	313704
917.38	245334		917.98	244063		917.98	203365		917.68	319269
917.28	247133		917.88	246159		917.88	206247		917.58	320809
917.18	247000		917.78	248910		917.78	208592		917.48	326774
917.08	246175		917.68	252170		917.68	211335		917.38	330270
916.98	246984		917.58	255061		917.58	214631		917.28	334802
916.88	246618		917.48	256933		917.48	217849		917.18	341356
916.78	245420		917.38	259202		917.38	220854		917.08	344551
916.68	242494		917.28	262849		917.28	224036		916.98	347996
916.58	241027		917.18	266399		917.18	226320		916.88	351403
916.48	239124		917.08	270517		917.08	227916		916.78	352260
916.38	236123		916.98	273966		916.98	229552		916.68	352995
916.28	234381		916.88	278507		916.88	229998		916.58	354560
916.18	232458		916.78	280057		916.78	230241		916.48	354114
916.08	229221		916.68	284464		916.68	231154		916.38	353367
915.98	225964		916.58	285809		916.58	230567		916.28	353979
915.88	225127		916.48	286744		916.48	229691		916.18	350981
915.78	219684		916.38	288354		916.38	228568		916.08	347715
915.68	217461		916.28	290262		916.28	226054		915.98	343238
915.58	215412		916.18	290047		916.18	223395		915.88	339683
915.48	211743		916.08	288140		916.08	221265		915.78	335111
915.38	209809		915.98	286053		915.98	218434		915.68	331062
915.28	207564		915.88	284166		915.88	215920		915.58	326408
915.18	205022		915.78	282533		915.78	212952		915.48	322529
915.08	203638		915.68	279123		915.68	209149		915.38	318658
914.98	201118		915.58	275538		915.58	205894		915.28	313415
914.88	198837		915.48	271225		915.48	202555		915.18	307544
914.78	196992		915.38	268084		915.38	199382		915.08	304307
914.68	196806		915.28	263564		915.28	196325		914.98	301496
914.58	196424		915.18	259968		915.18	193136		914.88	296257
914.48	193873		915.08	255561		915.08	190883		914.78	293462
914.38	193673		914.98	251502		914.98	188779		914.68	288778
914.28	193288		914.88	249045		914.88	186310		914.58	285443
914.18	192219		914.78	244797		914.78	185268		914.48	283942
914.08	189693		914.68	240764		914.68	183838		914.38	281198
913.98	190078		914.58	237606		914.58	182486		914.28	280556
913.88	190216		914.48	235970		914.48	180739		914.18	277720
913.78	188811		914.38	233824		914.38	179213		914.08	275007
913.68	189061		914.28	233074		914.28	178904		913.98	274753
913.58	189104		914.18	229946		914.18	178561		913.88	271760
913.48	187542		914.08	228499		914.08	177397		913.78	270116
913.38	187914		913.98	227387		913.98	176530		913.68	270308
913.28	187787		913.88	226046		913.88	175665		913.58	268486
913.18	187525		913.78	225746		913.78	175650		913.48	269832
913.08	187596		913.68	224785		913.68	175645		913.38	268521
912.98	187474		913.58	222286		913.58	174813		913.28	268096
912.88	186952		913.48	221297		913.48	174110		913.18	265181
912.78	187464		913.38	220666		913.38	173231		913.08	266735
912.68	186735		913.28	220639		913.28	172691		912.98	266502
912.58	187546		913.18	219767		913.18	173150		912.88	265776
912.48	187484		913.08	219364		913.08	172946		912.78	265197
912.38	186614		912.98	218602		912.98	172911		912.68	264333
912.28	187428		912.88	219573		912.88	172581		912.58	265090
912.18	188476		912.78	218553		912.78	172123		912.48	264527
912.08	185791		912.68	217997		912.68	172480		912.38	266412
911.98	187883		912.58	217971		912.58	172438		912.28	265575
911.88	187683		912.48	218720		912.48	172740		912.18	264192
911.78	188422		912.38	217804		912.38	172603		912.08	262575
911.68	187749		912.28	217909		912.28	171973		911.98	263761
911.58	188100		912.18	217263		912.18	172237		911.88	265411
911.48	188482		912.08	218415		912.08	172552		911.78	266472
911.38	188289		911.98	217329		911.98	172777		911.68	264705
911.28	189060		911.88	216437		911.88	172554		911.58	263566
911.18	188657		911.78	216315		911.78	172344		911.48	265687
911.08	188920		911.68	216045		911.68	172388		911.38	266272
910.98	190112		911.58	217478		911.58	172962		911.28	265475
910.88	188673		911.48	217466		911.48	173966		911.18	264786
910.78	190334		911.38	216730		911.38	174348		911.08	264606
910.68	190892		911.28	217436		911.28	173272		910.98	265972
910.58	190652		911.18	218095		911.18	173296		910.88	265316
910.48	190377		911.08	216812		911.08	173410		910.78	266379
910.38	190709		910.98	216629		910.98	173498		910.68	266525
910.28	190862		910.88	218801		910.88	173631		910.58	267237
910.18	191765		910.78	219277		910.78	174560		910.48	266578
910.08	192671		910.68	218385		910.68	174544		910.38	267029
909.98	191956		910.58	217958		910.58	174158		910.28	268191
909.88	192114		910.48	219397		910.48	174269		910.18	268473
909.78	193790		910.38	220022		910.38	174558		910.08	268828
909.68	193565		910.28	218821		910.28	174553		909.98	269378
909.58	195267		910.18	220046		910.18	174849		909.88	268271
909.48	195613		910.08	219700		910.08	175734		909.78	269179
909.38	194320		909.98	221065		909.98	176580		909.68	269033
909.28	195827		909.88	220371		909.88	177102		909.58	270461
909.18	196206		909.78	219687		909.78	176616		909.48	271466
909.08	198080		909.68	220320		909.68	176389		909.38	271690
908.98	198683		909.58	221081		909.58	176495		909.28	271535
908.88	198718		909.48	222508		909.48	176651		909.18	271960
908.78	198986		909.38	222519		909.38	177166		909.08	272793
908.68	199190		909.28	222183		909.28	178479		908.98	274303
908.58	199749		909.18	222406		909.18	178879		908.88	274640
908.48	200670		909.08	222145		909.08	178795		908.78	276806
908.38	201130		908.98	222132		908.98	178896		908.68	277147
908.28	201087		908.88	223126		908.88	180269		908.58	277994
908.18	199868		908.78	225091		908.78	181306		908.48	280204
908.08	201861		908.68	225759		908.68	181612		908.38	280231
907.98	202601		908.58	224933		908.58	182065		908.28	280453
907.88	201924		908.48	225848		908.48	182146		908.18	282197
907.78	202249		908.38	226499		908.38	183630		908.08	282506
907.68	201326		908.28	227739		908.28	183633		907.98	283883
907.58	201256		908.18	227851		908.18	184481		907.88	283891
907.48	200604		908.08	228562		908.08	184959		907.78	283309
907.38	200887		907.98	228407		907.98	185239		907.68	283945
907.28	199164		907.88	230730		907.88	185483		907.58	282916
907.18	198977		907.78	231955		907.78	185480		907.48	285030
907.08	200363		907.68	232219		907.68	185233		907.38	283083
906.98	197817		907.58	231226		907.58	185456		907.28	284398
906.88	198811		907.48	231354		907.48	185503		907.18	285177
906.78	198535		907.38	231611		907.38	185317		907.08	285364
906.68	196327		907.28	232516		907.28	185289		906.98	283025
906.58	196373		907.18	232806		907.18	185790		906.88	282813
906.48	195585		907.08	232157		907.08	185749		906.78	283440
906.38	195679		906.98	233044		906.98	184876		906.68	281018
906.28	194016		906.88	232650		906.88	184065		906.58	280790
906.18	194263		906.78	231935		906.78	182989		906.48	279316
906.08	193510		906.68	232846		906.68	182627		906.38	278282
905.98	193389		906.58	231943		906.58	182438		906.28	278403
905.88	192801		906.48	231224		906.48	181583		906.18	276229
905.78	191197		906.38	229660		906.38	180016		906.08	275605
905.68	191506		906.28	227453		906.28	179166		905.98	274773
905.58	191376		906.18	226377		906.18	178773		905.88	274526
905.48	190561		906.08	226342		906.08	178160		905.78	272532
905.38	191356		905.98	226075		905.98	177271		905.68	272033
905.28	190661		905.88	224526		905.88	177235		905.58	269873
905.18	191424		905.78	224089		905.78	176941		905.48	270344
905.08	189361		905.68	223197		905.68	175407		905.38	267417
904.98	190908		905.58	221575		905.58	174497		905.28	267367
904.88	190372		905.48	220287		905.48	174293		905.18	267482
904.78	190461		905.38	219532		905.38	174293		905.08	267223
904.68	191380		905.28	218076		905.28	173953		904.98	267665
904.58	191034		905.18	217972		905.18	173253		904.88	266165
904.48	192529		905.08	216647		905.08	173311		904.78	264854
904.38	190846		904.98	216663		904.98	173414		904.68	265525
904.28	192108		904.88	215378		904.88	173238		904.58	267444
904.18	191340		904.78	215511		904.78	173397		904.48	266445
904.08	190343		904.68	215767		904.68	173673		904.38	265426
903.98	193621		904.58	215379		904.58	173674		904.28	267808
903.88	194704		904.48	214520		904.48	173759		904.18	267506
903.78	193897		904.38	215006		904.38	173489		904.08	267349
903.68	193836		904.28	214932		904.28	173318		903.98	267365
903.58	195012		904.18	214540		904.18	173406		903.88	267713
903.48	195241		904.08	215568		904.08	173781		903.78	267355
903.38	196008		903.98	216401		903.98	173897		903.68	269190
903.28	196907		903.88	215391		903.88	174416		903.58	268993
903.18	196920		903.78	215566		903.78	174895		903.48	269687
903.08	198243		903.68	214842		903.68	175833		903.38	270289
902.98	200085		903.58	215138		903.58	176279		903.28	271221
902.88	201070		903.48	215440		903.48	176063		903.18	271342
902.78	203642		903.38	216401		903.38	176372		903.08	270173
902.68	205236		903.28	216915		903.28	177179		902.98	272648
902.58	207710		903.18	217775		903.18	177446		902.88	276118
902.48	207938		903.08	218808		903.08	178207		902.78	275794
902.38	211255		902.98	219335		902.98	179171		902.68	276812
902.28	212456		902.88	218595		902.88	179959		902.58	277115
902.18	216355		902.78	219658		902.78	180746		902.48	278181
902.08	218124		902.68	221212		902.68	180979		902.38	279989
901.98	222050		902.58	221188		902.58	182607		902.28	283234
901.88	223785		902.48	222255		902.48	184304		902.18	284141
901.78	223926		902.38	223827		902.38	185601		902.08	288302
901.68	228279		902.28	225823		902.28	187608		901.98	288962
901.58	227460		902.18	227257		902.18	189592		901.88	292800
901.48	229036		902.08	228166		902.08	191221		901.78	297073
901.38	227008		901.98	228359		901.98	192718		901.68	302060
901.28	227527		901.88	231756		901.88	195202		901.58	305049
901.18	227219		901.78	232729		901.78	198113		901.48	308744
901.08	229483		901.68	234836		901.68	199848		901.38	313134
900.98	226775		901.58	237178		901.58	201843		901.28	316623
900.88	225331		901.48	239967		901.48	204474		901.18	320575
900.78	225012		901.38	243207		901.38	206117		901.08	322903
900.68	224213		901.28	246999		901.28	209027		900.98	324362
900.58	222110		901.18	249793		901.18	211135		900.88	324514
900.48	222428		901.08	253437		901.08	213130		900.78	326240
900.38	221677		900.98	255047		900.98	212784		900.68	326101
900.28	222264		900.88	257581		900.88	213071		900.58	325326
900.18	221720		900.78	260429		900.78	213242		900.48	325131
900.08	222204		900.68	264167		900.68	212132		900.38	321999
899.98	223306		900.58	263807		900.58	209786		900.28	319378
899.88	223612		900.48	264320		900.48	208126		900.18	317338
899.78	225750		900.38	264569		900.38	206933		900.08	315599
899.68	225520		900.28	263230		900.28	205355		899.98	312560
899.58	229747		900.18	261978		900.18	204225		899.88	310781
899.48	232229		900.08	259361		900.08	201755		899.78	310899
899.38	233946		899.98	256993		899.98	200367		899.68	311551
899.28	235748		899.88	255523		899.88	199353		899.58	311258
899.18	235608		899.78	253886		899.78	198814		899.48	312838
899.08	237768		899.68	251168		899.68	199104		899.38	310991
898.98	240143		899.58	249005		899.58	199703		899.28	314042
898.88	239738		899.48	246888		899.48	200740		899.18	315118
898.78	239000		899.38	245030		899.38	202906		899.08	320579
898.68	239039		899.28	244688		899.28	205054		898.98	323700
898.58	237607		899.18	245675		899.18	206971		898.88	326648
898.48	234796		899.08	247418		899.08	210101		898.78	330494
898.38	233179		898.98	250368		898.98	212411		898.68	336143
898.28	230842		898.88	251769		898.88	214987		898.58	338131
898.18	228468		898.78	254363		898.78	217997		898.48	341992
898.08	223981		898.68	257756		898.68	220690		898.38	343639
897.98	221291		898.58	262288		898.58	222177		898.28	344721
897.88	216208		898.48	266180		898.48	223277		898.18	344737
897.78	213301		898.38	269483		898.38	224446		898.08	343888
897.68	208203		898.28	273335		898.28	223801		897.98	342058
897.58	203614		898.18	275202		898.18	222320		897.88	338095
897.48	198992		898.08	277661		898.08	220923		897.78	335768
897.38	195259		897.98	278952		897.98	219507		897.68	329741
897.28	190600		897.88	279301		897.88	215683		897.58	324295
897.18	187788		897.78	279131		897.78	211331		897.48	317571
897.08	181598		897.68	277248		897.68	207419		897.38	310577
896.98	179432		897.58	274723		897.58	203511		897.28	304994
896.88	174598		897.48	270955		897.48	199566		897.18	298955
896.78	172233		897.38	268197		897.38	195368		897.08	290229
896.68	168874		897.28	263241		897.28	190134		896.98	284325
896.58	165175		897.18	257468		897.18	184811		896.88	277060
896.48	163171		897.08	251378		897.08	179956		896.78	268749
896.38	161063		896.98	245760		896.98	175173		896.68	263402
896.28	159211		896.88	239332		896.88	170610		896.58	256491
896.18	156962		896.78	232447		896.78	166335		896.48	251702
896.08	155134		896.68	227686		896.68	162617		896.38	245863
895.98	154286		896.58	221511		896.58	158779		896.28	241501
895.88	151916		896.48	216793		896.48	156755		896.18	236824
895.78	150983		896.38	210594		896.38	153986		896.08	232225
895.68	149188		896.28	205186		896.28	150983		895.98	228223
895.58	148319		896.18	201217		896.18	148986		895.88	225796
895.48	147740		896.08	197868		896.08	146996		895.78	220687
895.38	147378		895.98	194452		895.98	145857		895.68	220099
895.28	146965		895.88	191242		895.88	144245		895.58	217235
895.18	145267		895.78	188554		895.78	143158		895.48	214354
895.08	146033		895.68	185580		895.68	141475		895.38	214230
894.98	145967		895.58	183052		895.58	140157		895.28	211639
894.88	144743		895.48	181420		895.48	139220		895.18	208734
894.78	144940		895.38	180234		895.38	138154		895.08	209299
894.68	143917		895.28	178324		895.28	137063		894.98	207706
894.58	143283		895.18	176201		895.18	136499		894.88	206150
894.48	143820		895.08	176257		895.08	136748		894.78	205644
894.38	143209		894.98	174231		894.98	135292		894.68	204101
894.28	143347		894.88	173792		894.88	134001		894.58	203722
894.18	143608		894.78	173962		894.78	134592		894.48	203584
894.08	143061		894.68	171815		894.68	134209		894.38	201680
893.98	142786		894.58	171150		894.58	133580		894.28	200945
893.88	142557		894.48	171076		894.48	133286		894.18	201341
893.78	142450		894.38	170949		894.38	133415		894.08	200622
893.68	143353		894.28	170098		894.28	133475		893.98	200797
893.58	144066		894.18	169467		894.18	133458		893.88	201831
893.48	144946		894.08	169100		894.08	133192		893.78	201380
893.38	143633		893.98	169107		893.98	132907		893.68	200999
893.28	144788		893.88	168602		893.88	132636		893.58	201624
893.18	145122		893.78	168260		893.78	133275		893.48	200688
893.08	145758		893.68	168707		893.68	133499		893.38	201495
892.98	146453		893.58	169068		893.58	132921		893.28	201850
892.88	146507		893.48	168064		893.48	133688		893.18	201292
892.78	147453		893.38	167576		893.38	134186		893.08	201850
892.68	147795		893.28	167008		893.28	134059		892.98	202393
892.58	148971		893.18	168975		893.18	133687		892.88	203733
892.48	148925		893.08	169521		893.08	134406		892.78	203798
892.38	149794		892.98	169450		892.98	135328		892.68	203290
892.28	149992		892.88	169463		892.88	135446		892.58	203671
892.18	151415		892.78	168886		892.78	135688		892.48	205201
892.08	151391		892.68	170350		892.68	135929		892.38	204887
891.98	152871		892.58	170023		892.58	136229		892.28	205216
891.88	152611		892.48	170343		892.48	136502		892.18	205258
891.78	152736		892.38	170844		892.38	136964		892.08	206226
891.68	153878		892.28	171778		892.28	137084		891.98	208426
891.58	154616		892.18	172625		892.18	137881		891.88	207436
891.48	156347		892.08	172103		892.08	138532		891.78	210054
891.38	157945		891.98	172160		891.98	138258		891.68	209915
891.28	156843		891.88	173538		891.88	139094		891.58	212021
891.18	158814		891.78	174664		891.78	140428		891.48	213836
891.08	159204		891.68	173893		891.68	140610		891.38	214520
890.98	160912		891.58	174399		891.58	141714		891.28	215488
890.88	161715		891.48	175516		891.48	142828		891.18	217238
890.78	163515		891.38	177241		891.38	142504		891.08	216820
890.68	164604		891.28	177988		891.28	143308		890.98	218322
890.58	166814		891.18	178048		891.18	144427		890.88	219492
890.48	167924		891.08	178470		891.08	145624		890.78	221892
890.38	166884		890.98	180023		890.98	146835		890.68	223505
890.28	168457		890.88	180791		890.88	147320		890.58	224802
890.18	169669		890.78	182130		890.78	147932		890.48	225881
890.08	171079		890.68	183246		890.68	148637		890.38	227738
889.98	171788		890.58	184112		890.58	149338		890.28	229685
889.88	172357		890.48	185742		890.48	150931		890.18	232163
889.78	174300		890.38	186756		890.38	152499		890.08	234181
889.68	174027		890.28	186692		890.28	153612		889.98	234942
889.58	175303		890.18	188835		890.18	154495		889.88	237017
889.48	175948		890.08	190734		890.08	155184		889.78	238418
889.38	175253		889.98	191424		889.98	156168		889.68	239884
889.28	176162		889.88	192874		889.88	156847		889.58	240614
889.18	176092		889.78	193876		889.78	158032		889.48	241721
889.08	174375		889.68	194587		889.68	159537		889.38	243192
888.98	176453		889.58	195445		889.58	160296		889.28	244042
888.88	176106		889.48	197133		889.48	160429		889.18	243603
888.78	175708		889.38	198204		889.38	160828		889.08	245015
888.68	175718		889.28	199499		889.28	161631		888.98	247251
888.58	174754		889.18	200247		889.18	161686		888.88	247906
888.48	173988		889.08	201227		889.08	162129		888.78	248253
888.38	174203		888.98	201845		888.98	162722		888.68	247837
888.28	174043		888.88	202146		888.88	162813		888.58	247033
888.18	173105		888.78	202607		888.78	163167		888.48	247342
888.08	172573		888.68	203864		888.68	162932		888.38	247958
887.98	172075		888.58	203816		888.58	161878		888.28	246028
887.88	171053		888.48	203527		888.48	161399		888.18	247291
887.78	170819		888.38	203392		888.38	160954		888.08	243905
887.68	169729		888.28	202702		888.28	161633		887.98	245439
887.58	169552		888.18	202832		888.18	160806		887.88	244755
887.48	169773		888.08	202871		888.08	160223		887.78	242586
887.38	167855		887.98	202007		887.98	160474		887.68	242074
887.28	167948		887.88	201438		887.88	158982		887.58	240155
887.18	167306		887.78	200539		887.78	157816		887.48	240279
887.08	166901		887.68	199906		887.68	157085		887.38	238114
886.98	167130		887.58	197846		887.58	157051		887.28	238690
886.88	167091		887.48	197783		887.48	156921		887.18	236443
886.78	166672		887.38	196895		887.38	155461		887.08	236598
886.68	165447		887.28	195249		887.28	153779		886.98	235328
886.58	165311		887.18	194780		887.18	153019		886.88	233636
886.48	165646		887.08	192960		887.08	152839		886.78	232986
886.38	166756		886.98	192934		886.98	153137		886.68	232823
886.28	165133		886.88	191419		886.88	153193		886.58	232599
886.18	166178		886.78	190969		886.78	151853		886.48	231306
886.08	166315		886.68	190400		886.68	151067		886.38	233268
885.98	166332		886.58	188717		886.58	151087		886.28	231824
885.88	165426		886.48	187942		886.48	150800		886.18	229493
885.78	167063		886.38	187508		886.38	150994		886.08	230867
885.68	167000		886.28	186596		886.28	150656		885.98	229758
885.58	166463		886.18	186005		886.18	150105		885.88	231434
885.48	167673		886.08	185905		886.08	150286		885.78	229751
885.38	168965		885.98	186200		885.98	150774		885.68	231073
885.28	168982		885.88	185462		885.88	151056		885.58	232253
885.18	169316		885.78	184575		885.78	150436		885.48	231547
885.08	169553		885.68	184886		885.68	150286		885.38	232284
884.98	170261		885.58	184073		885.58	150802		885.28	232307
884.88	171232		885.48	184244		885.48	151551		885.18	232809
884.78	173420		885.38	185587		885.38	151888		885.08	233590
884.68	174579		885.28	185370		885.28	152097		884.98	234257
884.58	175399		885.18	184918		885.18	152444		884.88	235961
884.48	176259		885.08	186039		885.08	153031		884.78	236469
884.38	179192		884.98	185339		884.98	153225		884.68	235897
884.28	179848		884.88	186945		884.88	154575		884.58	237888
884.18	182692		884.78	186626		884.78	155386		884.48	238109
884.08	185797		884.68	187764		884.68	155757		884.38	239564
883.98	187306		884.58	189009		884.58	156563		884.28	240809
883.88	190136		884.48	189170		884.48	157154		884.18	242790
883.78	193815		884.38	190634		884.38	158188		884.08	244236
883.68	195479		884.28	190958		884.28	159287		883.98	245836
883.58	198913		884.18	192767		884.18	160442		883.88	248900
883.48	202471		884.08	193466		884.08	161785		883.78	251067
883.38	205101		883.98	194817		883.98	163680		883.68	253472
883.28	205659		883.88	195963		883.88	165142		883.58	257052
883.18	206986		883.78	197495		883.78	167182		883.48	258874
883.08	209208		883.68	198795		883.68	170125		883.38	264124
882.98	208980		883.58	201471		883.58	172499		883.28	266915
882.88	210363		883.48	204102		883.48	174614		883.18	272486
882.78	209310		883.38	206471		883.38	177013		883.08	276616
882.68	208671		883.28	208453		883.28	179823		882.98	282412
882.58	204758		883.18	212024		883.18	183815		882.88	288514
882.48	204218		883.08	215476		883.08	186510		882.78	291567
882.38	199765		882.98	218718		882.98	188299		882.68	294999
882.28	197577		882.88	221469		882.88	190997		882.58	296999
882.18	194049		882.78	226397		882.78	192976		882.48	301110
882.08	190079		882.68	230125		882.68	194629		882.38	301885
881.98	185281		882.58	232446		882.58	195589		882.28	300442
881.88	180903		882.48	234880		882.48	195474		882.18	300488
881.78	175962		882.38	238030		882.38	195356		882.08	297255
881.68	172558		882.28	240432		882.28	194595		881.98	294802
881.58	167346		882.18	243343		882.18	193324		881.88	289659
881.48	161553		882.08	243375		882.08	190483		881.78	285222
881.38	156594		881.98	244314		881.98	186382		881.68	277399
881.28	152727		881.88	242196		881.88	182529		881.58	272683
881.18	148735		881.78	240671		881.78	177323		881.48	263609
881.08	144698		881.68	238216		881.68	172697		881.38	256724
880.98	141553		881.58	233228		881.58	168049		881.28	250530
880.88	137239		881.48	228255		881.48	162228		881.18	241817
880.78	134139		881.38	222422		881.38	156769		881.08	235409
880.68	131114		881.28	215918		881.28	152521		880.98	227581
880.58	128359		881.18	210389		881.18	146802		880.88	221664
880.48	127170		881.08	204590		881.08	141649		880.78	215006
880.38	124509		880.98	196881		880.98	137546		880.68	208218
880.28	121733		880.88	190498		880.88	133368		880.58	202919
880.18	120386		880.78	183245		880.78	129575		880.48	197034
880.08	119173		880.68	177705		880.68	127145		880.38	191780
879.98	118357		880.58	172211		880.58	124155		880.28	187925
879.88	117126		880.48	166992		880.48	121471		880.18	183770
879.78	115942		880.38	162465		880.38	119605		880.08	180655
879.68	115140		880.28	159350		880.28	118157		879.98	177079
879.58	114319		880.18	155884		880.18	116178		879.88	173761
879.48	114163		880.08	152960		880.08	114403		879.78	171703
879.38	113447		879.98	150571		879.98	112645		879.68	171717
879.28	112800		879.88	147470		879.88	111413		879.58	168713
879.18	112517		879.78	145489		879.78	110201		879.48	167153
879.08	111903		879.68	144574		879.68	109046		879.38	165736
878.98	111703		879.58	143836		879.58	108905		879.28	163220
878.88	110897		879.48	141879		879.48	108685		879.18	161604
878.78	110611		879.38	140540		879.38	107477		879.08	160942
878.68	111529		879.28	139834		879.28	106514		878.98	160107
878.58	110864		879.18	139603		879.18	106449		878.88	159237
878.48	108417		879.08	138565		879.08	106211		878.78	158303
878.38	110020		878.98	138122		878.98	105694		878.68	157518
878.28	110186		878.88	137055		878.88	105636		878.58	156770
878.18	110493		878.78	136611		878.78	105343		878.48	158550
878.08	110028		878.68	136426		878.68	104546		878.38	156783
877.98	109562		878.58	136940		878.58	104204		878.28	155867
877.88	109578		878.48	136260		878.48	104037		878.18	155136
877.78	109242		878.38	134747		878.38	104126		878.08	156016
877.68	108936		878.28	136109		878.28	103787		877.98	154537
877.58	109858		878.18	135360		878.18	103708		877.88	153361
877.48	109815		878.08	134776		878.08	103915		877.78	154388
877.38	109023		877.98	134494		877.98	103853		877.68	153614
877.28	108953		877.88	134341		877.88	103714		877.58	153419
877.18	109304		877.78	133392		877.78	103511		877.48	154393
877.08	108890		877.68	133454		877.68	103731		877.38	154579
876.98	109058		877.58	133175		877.58	103739		877.28	154203
876.88	109892		877.48	132928		877.48	103155		877.18	153755
876.78	108249		877.38	132460		877.38	103399		877.08	153324
876.68	108395		877.28	133499		877.28	103228		876.98	153658
876.58	108372		877.18	133236		877.18	103214		876.88	153632
876.48	108503		877.08	133185		877.08	103693		876.78	154024
876.38	107925		876.98	133031		876.98	103397		876.68	153666
876.28	108432		876.88	132300		876.88	103321		876.58	153452
876.18	109086		876.78	132771		876.78	103219		876.48	152332
876.08	109217		876.68	133324		876.68	102922		876.38	152524
875.98	108848		876.58	133449		876.58	103240		876.28	152644
875.88	109524		876.48	132874		876.48	103525		876.18	152664
875.78	108976		876.38	132501		876.38	103798		876.08	152506
875.68	109248		876.28	132462		876.28	103692		875.98	153535
875.58	108600		876.18	132948		876.18	103635		875.88	151584
875.48	108077		876.08	132154		876.08	103094		875.78	151836
875.38	108694		875.98	132366		875.98	103202		875.68	152900
875.28	108950		875.88	132949		875.88	103411		875.58	152639
875.18	109168		875.78	133410		875.78	102793		875.48	152115
875.08	108752		875.68	132926		875.68	102279		875.38	152892
874.98	109219		875.58	131914		875.58	103514		875.28	152579
874.88	109333		875.48	132182		875.48	103127		875.18	152881
874.78	108955		875.38	132270		875.38	102543		875.08	153183
874.68	108871		875.28	132635		875.28	102522		874.98	152678
874.58	108453		875.18	132445		875.18	102319		874.88	152307
874.48	108827		875.08	132511		875.08	102237		874.78	152349
874.38	108415		874.98	132557		874.98	102380		874.68	151337
874.28	108168		874.88	133705		874.88	102970		874.58	153049
874.18	108592		874.78	132988		874.78	102735		874.48	152767
874.08	108880		874.68	132559		874.68	102575		874.38	152929
873.98	108620		874.58	132799		874.58	102562		874.28	151847
873.88	109779		874.48	133045		874.48	102936		874.18	152788
873.78	109234		874.38	132649		874.38	103141		874.08	153482
873.68	109863		874.28	133018		874.28	102586		873.98	153627
873.58	108158		874.18	133098		874.18	103049		873.88	152528
873.48	108038		874.08	132627		874.08	103406		873.78	153682
873.38	109752		873.98	132714		873.98	103102		873.68	153082
873.28	109233		873.88	133313		873.88	103512		873.58	153129
873.18	108973		873.78	132566		873.78	103425		873.48	151900
873.08	108400		873.68	132983		873.68	102896		873.38	152189
872.98	108420		873.58	132698		873.58	103256		873.28	152671
872.88	108843		873.48	132715		873.48	102932		873.18	152596
872.78	109959		873.38	132757		873.38	102779		873.08	152224
872.68	108163		873.28	131554		873.28	103101		872.98	152520
872.58	109592		873.18	131908		873.18	103424		872.88	152674
872.48	108304		873.08	132076		873.08	102721		872.78	152222
872.38	108859		872.98	132165		872.98	102572		872.68	152462
872.28	107840		872.88	131995		872.88	102943		872.58	151147
872.18	108946		872.78	132771		872.78	102734		872.48	152409
872.08	108058		872.68	132545		872.68	102845		872.38	152896
871.98	108524		872.58	132655		872.58	103081		872.28	151987
871.88	108797		872.48	133127		872.48	102944		872.18	152216
871.78	108540		872.38	132941		872.38	102891		872.08	152906
871.68	108539		872.28	132347		872.28	102735		871.98	152805
871.58	109445		872.18	132922		872.18	102265		871.88	152185
871.48	108648		872.08	133456		872.08	102273		871.78	152639
871.38	108663		871.98	132615		871.98	103127		871.68	152099
871.28	108552		871.88	131949		871.88	103313		871.58	154076
871.18	108546		871.78	132027		871.78	103382		871.48	152387
871.08	108645		871.68	133244		871.68	103425		871.38	152277
870.98	108381		871.58	132889		871.58	103479		871.28	152414
870.88	108621		871.48	133482		871.48	102998		871.18	152954
870.78	109070		871.38	133120		871.38	102729		871.08	152621
870.68	108522		871.28	133048		871.28	102710		870.98	152355
870.58	108523		871.18	132775		871.18	103087		870.88	152639
870.48	108505		871.08	133348		871.08	103354		870.78	152755
870.38	109060		870.98	133138		870.98	103544		870.68	152822
870.28	108835		870.88	133329		870.88	102740		870.58	152317
870.18	109049		870.78	134013		870.78	102441		870.48	152522
870.08	108224		870.68	132952		870.68	102886		870.38	153163
869.98	108453		870.58	132554		870.58	102772		870.28	153121
869.88	108646		870.48	133037		870.48	102717		870.18	151866
869.78	108823		870.38	131956		870.38	102972		870.08	153377
869.68	108866		870.28	132987		870.28	103228		869.98	153047
869.58	108694		870.18	132962		870.18	103564		869.88	152961
869.48	109131		870.08	132774		870.08	103385		869.78	152739
869.38	108818		869.98	132453		869.98	102717		869.68	152493

## Sheet: F-XPS
GDC			F0.05GDC			F0.1GDC			F0.15GDC
Binding Energy	Intensity		Binding Energy	Intensity		Binding Energy	Intensity		Binding Energy	Intensity
698.08	46165		697.98	61270.5		697.98	46329.6		697.58	63512
697.98	46519.7		697.88	61343.6		697.88	46420.9		697.48	63569.8
697.88	46665.4		697.78	61429.5		697.78	46220		697.38	62764.4
697.78	46269.6		697.68	61531.7		697.68	45912.3		697.28	63338.2
697.68	46191.4		697.58	61053.7		697.58	45978.5		697.18	62993.8
697.58	45917.5		697.48	61377		697.48	45935.3		697.08	62659
697.48	46169.3		697.38	61240.3		697.38	46123		696.98	62743
697.38	46206.1		697.28	61035.7		697.28	46069.7		696.88	62260.2
697.28	45559.7		697.18	61089.8		697.18	45983.6		696.78	62504.1
697.18	45818		697.08	60987.7		697.08	45702.7		696.68	62547.5
697.08	45836.9		696.98	61296.6		696.98	45562.3		696.58	62496.6
696.98	45279		696.88	61350.2		696.88	45466.1		696.48	62394.8
696.88	45806.1		696.78	61105.3		696.78	45279.2		696.38	61637.5
696.78	45458		696.68	60773.4		696.68	45397.8		696.28	62575.1
696.68	45438.4		696.58	61020.9		696.58	45585.3		696.18	62082
696.58	46161.6		696.48	60786.2		696.48	45749.9		696.08	61944.1
696.48	45511.9		696.38	60546		696.38	45568.1		695.98	61931.1
696.38	45445.7		696.28	59938.6		696.28	45267.2		695.88	61990
696.28	45678.6		696.18	60967.4		696.18	45280.6		695.78	62924.4
696.18	45466.7		696.08	60553		696.08	45495.7		695.68	62022.7
696.08	45514.8		695.98	60546.5		695.98	45304.1		695.58	61904.4
695.98	45839.9		695.88	60546.7		695.88	45295.1		695.48	61787.3
695.88	45401.7		695.78	60243.8		695.78	45528.4		695.38	61708.2
695.78	45262.6		695.68	60227.5		695.68	44990.9		695.28	62040.3
695.68	45408.8		695.58	59879.8		695.58	44938.1		695.18	61456.3
695.58	45278.5		695.48	60109.7		695.48	45235.7		695.08	61034.8
695.48	45432.5		695.38	60421.5		695.38	45142.8		694.98	61365.3
695.38	45282.1		695.28	59910.2		695.28	45095.5		694.88	61257.3
695.28	45179.7		695.18	60278.6		695.18	45053.9		694.78	61066.2
695.18	45357.2		695.08	59900.9		695.08	44986.5		694.68	61270.2
695.08	45014.2		694.98	59655.2		694.98	44901.8		694.58	60817.3
694.98	45026.7		694.88	59597.2		694.88	44803.9		694.48	61657
694.88	44826.3		694.78	59467.3		694.78	44921.8		694.38	61047.8
694.78	45025.2		694.68	60119		694.68	45120.8		694.28	60875.3
694.68	45109.4		694.58	59800.5		694.58	45200		694.18	61306.5
694.58	44414.6		694.48	60197		694.48	44863		694.08	61319.6
694.48	44544.3		694.38	60502.9		694.38	44723.7		693.98	59485.3
694.38	45264.6		694.28	59561.8		694.28	44805		693.88	60053.6
694.28	45183.8		694.18	59551.4		694.18	44680.4		693.78	60681.8
694.18	44948.9		694.08	59898.8		694.08	44645.3		693.68	60896.3
694.08	44837		693.98	59780.5		693.98	44422.4		693.58	61130.8
693.98	45021		693.88	60024.4		693.88	44329.2		693.48	60483.5
693.88	44618.4		693.78	59574.8		693.78	44562		693.38	60144.3
693.78	44851		693.68	59707		693.68	44691		693.28	60767.1
693.68	44785		693.58	59677.1		693.58	44639		693.18	60309.8
693.58	44546.7		693.48	60055.1		693.48	44780.8		693.08	60508.4
693.48	44466		693.38	59927.9		693.38	44459.9		692.98	60400.2
693.38	44479		693.28	59500.4		693.28	44393		692.88	59948.4
693.28	44450.7		693.18	59147.1		693.18	44311.9		692.78	59821.2
693.18	44390.4		693.08	59065.6		693.08	44126		692.68	61314.2
693.08	44379		692.98	59153.4		692.98	44299.9		692.58	60413.1
692.98	44381.2		692.88	58902.1		692.88	44281.2		692.48	60187.2
692.88	44737.4		692.78	58309		692.78	44198.5		692.38	60315
692.78	44252.1		692.68	58694.1		692.68	44205.7		692.28	59918.7
692.68	44010		692.58	58750		692.58	44199.4		692.18	60027.5
692.58	44240.8		692.48	59362.6		692.48	44033.3		692.08	60317.8
692.48	44369.9		692.38	58296		692.38	43899.4		691.98	59947.7
692.38	44370.2		692.28	59005.5		692.28	43803.9		691.88	59991.4
692.28	44579.8		692.18	59022.3		692.18	44052.8		691.78	60064.5
692.18	44660.1		692.08	58767.8		692.08	43885.7		691.68	60107.2
692.08	44385.5		691.98	59069.5		691.98	44000.4		691.58	59446.2
691.98	44125.8		691.88	57921.3		691.88	44243.5		691.48	60039.8
691.88	43838.8		691.78	58019.9		691.78	43950		691.38	59322.8
691.78	43722.4		691.68	58278.1		691.68	43662.4		691.28	59486.9
691.68	43556.4		691.58	58685		691.58	43599.1		691.18	59820.5
691.58	43974.2		691.48	58239.4		691.48	43721.4		691.08	58829.1
691.48	43517.5		691.38	58229.5		691.38	43784.1		690.98	58993.1
691.38	43423.8		691.28	58716.4		691.28	43648.7		690.88	59109.2
691.28	43811.1		691.18	58754.4		691.18	43639.8		690.78	59162.4
691.18	43770.4		691.08	59047.6		691.08	43775.9		690.68	58826.5
691.08	44379.1		690.98	58791.9		690.98	43665.7		690.58	59441.5
690.98	43780.7		690.88	58379		690.88	43491.3		690.48	59219.3
690.88	43951.4		690.78	57473.2		690.78	43343.6		690.38	59050.1
690.78	44068.8		690.68	58045.8		690.68	43459.8		690.28	59163.8
690.68	43851.2		690.58	58451.3		690.58	43698.6		690.18	59345.8
690.58	44247.2		690.48	57932.4		690.48	43432.1		690.08	59012.9
690.48	43653.1		690.38	58069.5		690.38	43620.5		689.98	59367.2
690.38	43699.2		690.28	58437		690.28	43572.6		689.88	59160.8
690.28	43710.5		690.18	58515.3		690.18	43418.6		689.78	59606.6
690.18	43948.5		690.08	58585.6		690.08	43680.4		689.68	58513.9
690.08	43809.6		689.98	57912.4		689.98	43752.8		689.58	58969.6
689.98	43497.3		689.88	57663.4		689.88	43385.1		689.48	58917.6
689.88	43254.5		689.78	57741.8		689.78	43150.9		689.38	59518
689.78	43657.6		689.68	57462.6		689.68	43393.4		689.28	58233.2
689.68	43747.4		689.58	57717.3		689.58	43625.5		689.18	58855.2
689.58	43388.8		689.48	57961.3		689.48	43361.2		689.08	59188.8
689.48	43410.7		689.38	58340.5		689.38	43354.7		688.98	59204.2
689.38	43411.6		689.28	58472.8		689.28	43449.1		688.88	58655.2
689.28	43695.4		689.18	58111.2		689.18	43230.3		688.78	58543.5
689.18	43454.3		689.08	58391.2		689.08	43344.7		688.68	58580.3
689.08	43654.6		688.98	57995.5		688.98	43425.8		688.58	58557.4
688.98	43619.8		688.88	57907.2		688.88	43522.2		688.48	57768.1
688.88	43424.1		688.78	57699.7		688.78	43397.8		688.38	59045.8
688.78	43774.4		688.68	57773.3		688.68	43278.4		688.28	57917
688.68	43635		688.58	58069.2		688.58	43480.6		688.18	58994.8
688.58	43140.1		688.48	57421.6		688.48	43731.7		688.08	58572.2
688.48	43695.8		688.38	57815.5		688.38	43742.9		687.98	59062.9
688.38	43194.1		688.28	57246.1		688.28	43722.3		687.88	58801.2
688.28	43527.8		688.18	57924.8		688.18	43816.9		687.78	58368.6
688.18	43311.3		688.08	57899.6		688.08	43717.7		687.68	59155.2
688.08	43625.3		687.98	57636.4		687.98	43699.4		687.58	58334.1
687.98	43329.7		687.88	57559.2		687.88	43806.5		687.48	58811.3
687.88	43858.7		687.78	57219.4		687.78	43858		687.38	58998.3
687.78	43678.8		687.68	57685.6		687.68	43724.5		687.28	58390.1
687.68	43425.7		687.58	57508.7		687.58	43881.3		687.18	58555.2
687.58	42993		687.48	57564.3		687.48	43771.3		687.08	58822.2
687.48	43621.2		687.38	58320.9		687.38	43794.7		686.98	58212.4
687.38	43156.4		687.28	57878		687.28	44110.2		686.88	58916.5
687.28	43671.3		687.18	57561.4		687.18	44348.1		686.78	58540.4
687.18	43502.8		687.08	57631.6		687.08	43968.5		686.68	58967.4
687.08	43465.5		686.98	57389.4		686.98	44067.5		686.58	58703.8
686.98	43666.4		686.88	57259.3		686.88	44306.5		686.48	58420.4
686.88	43197.8		686.78	57279.4		686.78	44228.4		686.38	58008
686.78	43548.3		686.68	57741.4		686.68	44219.1		686.28	58361.9
686.68	43072.1		686.58	57600		686.58	44386.3		686.18	58404.3
686.58	43175.5		686.48	57041.7		686.48	44371.6		686.08	58033.7
686.48	43585.1		686.38	57645.9		686.38	44308.1		685.98	58014.1
686.38	43271		686.28	57022.4		686.28	44714		685.88	58427
686.28	42964.3		686.18	57281.8		686.18	45017.5		685.78	58454.2
686.18	43474.1		686.08	57928.9		686.08	44731		685.68	58521.1
686.08	43348.3		685.98	57385.1		685.98	44581.7		685.58	58839.3
685.98	43587		685.88	57650.9		685.88	45044.1		685.48	58552.9
685.88	42959.4		685.78	57170.9		685.78	45645.2		685.38	58967.1
685.78	43104.4		685.68	57094		685.68	45729.5		685.28	58222
685.68	42749.3		685.58	57885.8		685.58	46079.2		685.18	58892.1
685.58	43210.9		685.48	58307.3		685.48	46791		685.08	59282.8
685.48	43350		685.38	57984.7		685.38	47258.2		684.98	58192.3
685.38	43164		685.28	57149.2		685.28	47614.5		684.88	59036
685.28	42993.9		685.18	58095.3		685.18	48261.8		684.78	58279.3
685.18	43336.3		685.08	57844.1		685.08	48498.4		684.68	59934.7
685.08	42975.7		684.98	57332.9		684.98	48975.2		684.58	59740.9
684.98	42968.1		684.88	57546.4		684.88	49168		684.48	59603.7
684.88	43433		684.78	57781.9		684.78	49071		684.38	59661.8
684.78	43087.8		684.68	58051.9		684.68	49214.2		684.28	59842.2
684.68	43469		684.58	57985.7		684.58	49495.1		684.18	60256.4
684.58	42758.6		684.48	58107.3		684.48	49297.9		684.08	59438.5
684.48	43237.6		684.38	57951.7		684.38	49142.7		683.98	59191.5
684.38	43184.4		684.28	58172.3		684.28	48875		683.88	58730.6
684.28	43232.2		684.18	58323.3		684.18	48540.2		683.78	59219.9
684.18	43256.8		684.08	58024.3		684.08	48042.5		683.68	59230.4
684.08	43082.7		683.98	57942.4		683.98	47562.4		683.58	59124.4
683.98	43567.3		683.88	58090.6		683.88	47003.9		683.48	58869.4
683.88	42889.1		683.78	58012.6		683.78	46397.6		683.38	58847.7
683.78	43239.5		683.68	58137.9		683.68	45616.6		683.28	58325.3
683.68	43393.9		683.58	57449.7		683.58	45146.8		683.18	59513.4
683.58	42815.2		683.48	57196.1		683.48	44834.7		683.08	59396.2
683.48	43493.1		683.38	57648.5		683.38	44552.8		682.98	58916.2
683.38	43346.8		683.28	57713.6		683.28	44167		682.88	58039
683.28	42980.6		683.18	56774.2		683.18	44082.7		682.78	58459.3
683.18	43172		683.08	57190.6		683.08	43850.2		682.68	58762.3
683.08	43376.8		682.98	57345.8		682.98	43288.9		682.58	58110.2
682.98	43578.1		682.88	56929.5		682.88	43525.6		682.48	59020.6
682.88	42770.3		682.78	56408		682.78	43482.5		682.38	58677.8
682.78	43404.1		682.68	57470		682.68	43315.2		682.28	58514.5
682.68	43204.7		682.58	57680.1		682.58	43378.5		682.18	58984.1
682.58	43288.2		682.48	57859.4		682.48	43383.1		682.08	58416
682.48	43538.1		682.38	57939.2		682.38	43290.3		681.98	58318.6
682.38	43099		682.28	57410.7		682.28	43044.6		681.88	57879.7
682.28	42640.4		682.18	57328.4		682.18	43007.4		681.78	58444.1
682.18	43320.3		682.08	57209.4		682.08	42874.9		681.68	59285.5
682.08	43134.3		681.98	57605.4		681.98	42655.7		681.58	57797
681.98	43461.8		681.88	58200.7		681.88	42395.1		681.48	58094.9
681.88	42512.3		681.78	57052		681.78	42435.7		681.38	58378.7
681.78	42933.7		681.68	56948.6		681.68	42558.3		681.28	58664.5
681.68	42842.7		681.58	57084.4		681.58	42519.2		681.18	57915.4
681.58	43163.3		681.48	57588.4		681.48	42667.7		681.08	58097.9
681.48	42987.9		681.38	58286.6		681.38	42596.8		680.98	57876.9
681.38	43542.6		681.28	57735.6		681.28	42757.2		680.88	58710.9
681.28	42984.4		681.18	56947.9		681.18	42939.5		680.78	58193.3
681.18	43221.8		681.08	57464.4		681.08	42686.5		680.68	58445.7
681.08	43563.5		680.98	57222.5		680.98	42643.5		680.58	58546
680.98	43658.9		680.88	56920.5		680.88	42556.4		680.48	58532.6
680.88	43025.9		680.78	57081.2		680.78	42394.9		680.38	57632.3
680.78	42476.8		680.68	57107.7		680.68	42657.3		680.28	58530.8
680.68	43331.8		680.58	57415.9		680.58	42668.3		680.18	59161.1
680.58	43349		680.48	57304.3		680.48	42504.3		680.08	58243.4
680.48	42999.4		680.38	57596.7		680.38	42458.8		679.98	58994.4
680.38	43271.4		680.28	57134.2		680.28	42714.4		679.88	58031.4
680.28	43453		680.18	57529.8		680.18	42739.5		679.78	57985
680.18	43410.7		680.08	57094.9		680.08	42828.1		679.68	57595.1
680.08	43324.8		679.98	57478.8		679.98	42718.4		679.58	59035.7
679.98	43354.9		679.88	57387		679.88	42646.1		679.48	58661.5
679.88	42587.8		679.78	57250		679.78	42818.1		679.38	58584
679.78	43060.5		679.68	57022.6		679.68	42722.4		679.28	58620.9
679.68	43250.1		679.58	57284.1		679.58	42619.7		679.18	58172.6
679.58	43309.7		679.48	57875.1		679.48	42628.1		679.08	57787.3
679.48	43194.2		679.38	57183.6		679.38	42519.6		678.98	58531.3
679.38	42861		679.28	56726.3		679.28	42521.4		678.88	58361.2
679.28	42581.9		679.18	56932.7		679.18	42671.1		678.78	57906
679.18	43364.1		679.08	57647.2		679.08	42769.9		678.68	57962
679.08	43611.6		678.98	57983.3		678.98	42300.9		678.58	57888.2
678.98	43684.8		678.88	57761.7		678.88	42374.7		678.48	58110.5
678.88	43359.7		678.78	57548.5		678.78	43013.1		678.38	58019.8
678.78	43399.6		678.68	57528.6		678.68	43103		678.28	58455.3
678.68	43037.5		678.58	57364.9		678.58	42768.3		678.18	58267.5
678.58	43320.7		678.48	57185.9		678.48	42714.8		678.08	58193.6
678.48	43137.9		678.38	57386.2		678.38	42749.5		677.98	58944.5
678.38	43414.5		678.28	57639		678.28	42403.9		677.88	58990.1
678.28	42747.6		678.18	57632.6		678.18	42484.6		677.78	58317.5
678.18	43036.5		678.08	57253.8		678.08	42366.1		677.68	58563.1
678.08	43818.9		677.98	57091.2		677.98	42690.8		677.58	58605.4
