# Supplementary material
Source: Royal Society of Chemistry journal article supplement (doi:10.1039/d5ta09732k)
Supplement: d5ta09732k10.xlsx [file d5ta09732k10.xlsx]

## Sheet: original powder
GDC			F0.05GDC			F0.1GDC			F0.15GDC
2θ	Intensity		2θ	Intensity		2θ	Intensity		2θ	Intensity
20.0005	277		20	3774		20.007	221.4		20	3556
20.0135	277		20.0143	3777		20.02	231.6		20.0143	3687
20.0265	277		20.0286	3765		20.033	212.6		20.0286	3647
20.0395	278		20.0429	3741		20.046	185.1		20.0429	3696
20.0525	278		20.0572	3715		20.059	228.7		20.0572	3581
20.0655	279		20.0715	3718		20.072	217.2		20.0715	3657
20.0785	282		20.0858	3692		20.085	225.8		20.0858	3671
20.0915	286		20.1001	3732		20.098	211.5		20.1001	3667
20.1045	289		20.1144	3570		20.111	186.2		20.1144	3686
20.1175	288		20.1287	3636		20.124	204.8		20.1287	3696
20.1305	285		20.143	3893		20.137	196.7		20.143	3646
20.1435	279		20.1573	3684		20.15	172		20.1573	3640
20.1565	273		20.1716	3687		20.163	226.7		20.1716	3773
20.1695	268		20.1859	3827		20.176	198.5		20.1859	3594
20.1825	267		20.2002	3734		20.189	204.8		20.2002	3606
20.1955	268		20.2145	3711		20.202	233.4		20.2145	3753
20.2085	270		20.2288	3712		20.215	215.1		20.2288	3631
20.2215	272		20.2431	3832		20.228	186.1		20.2431	3527
20.2345	273		20.2574	3697		20.241	170.9		20.2574	3697
20.2475	274		20.2717	3805		20.254	200.3		20.2717	3614
20.2605	274		20.286	3748		20.267	192.6		20.286	3664
20.2735	274		20.3003	3725		20.28	194.1		20.3003	3754
20.2865	274		20.3146	3734		20.293	195.8		20.3146	3662
20.2995	275		20.3289	3836		20.306	195.2		20.3289	3688
20.3125	277		20.3432	3721		20.319	205.3		20.3432	3669
20.3255	278		20.3575	3882		20.332	196.2		20.3575	3783
20.3385	279		20.3718	3832		20.345	188.3		20.3718	3817
20.3515	279		20.3861	3766		20.358	203.1		20.3861	3764
20.3645	279		20.4004	3678		20.371	215.6		20.4004	3635
20.3775	278		20.4147	3699		20.384	250.1		20.4147	3612
20.3905	277		20.429	3713		20.397	227.9		20.429	3744
20.4035	277		20.4433	3695		20.41	203.7		20.4433	3673
20.4165	276		20.4576	3768		20.423	197.6		20.4576	3698
20.4295	277		20.4719	3779		20.436	210.4		20.4719	3765
20.4425	278		20.4862	3719		20.449	211.1		20.4862	3746
20.4555	282		20.5005	3641		20.462	228.9		20.5005	3485
20.4685	286		20.5148	3604		20.475	210.3		20.5148	3540
20.4815	289		20.5291	3705		20.488	193		20.5291	3516
20.4945	288		20.5434	3643		20.501	197.6		20.5434	3538
20.5075	283		20.5577	3641		20.514	211.3		20.5577	3604
20.5205	276		20.572	3690		20.527	215.7		20.572	3614
20.5335	270		20.5863	3620		20.54	203.7		20.5863	3643
20.5465	266		20.6006	3644		20.553	205		20.6006	3593
20.5595	266		20.6149	3611		20.566	201.5		20.6149	3482
20.5725	268		20.6292	3582		20.579	187.1		20.6292	3594
20.5855	272		20.6435	3572		20.592	202.1		20.6435	3659
20.5985	277		20.6578	3649		20.605	207.8		20.6578	3546
20.6115	280		20.6721	3702		20.618	212.9		20.6721	3621
20.6245	282		20.6864	3598		20.631	212.5		20.6864	3599
20.6375	281		20.7007	3646		20.644	216.5		20.7007	3760
20.6505	278		20.715	3657		20.657	220.6		20.715	3633
20.6635	273		20.7293	3660		20.67	201.8		20.7293	3580
20.6765	268		20.7436	3614		20.683	199.3		20.7436	3572
20.6895	266		20.7579	3677		20.696	204.4		20.7579	3526
20.7025	265		20.7722	3659		20.709	182.6		20.7722	3712
20.7155	267		20.7865	3665		20.722	190.3		20.7865	3617
20.7285	268		20.8008	3646		20.735	204.6		20.8008	3609
20.7415	270		20.8151	3742		20.748	185.4		20.8151	3679
20.7545	273		20.8294	3714		20.761	190		20.8294	3450
20.7675	275		20.8437	3727		20.774	199.9		20.8437	3587
20.7805	276		20.858	3614		20.787	187.7		20.858	3478
20.7935	278		20.8723	3665		20.8	174		20.8723	3629
20.8065	281		20.8866	3652		20.813	185		20.8866	3603
20.8195	283		20.9009	3707		20.826	197.4		20.9009	3525
20.8325	283		20.9152	3733		20.839	187		20.9152	3596
20.8455	281		20.9295	3744		20.852	191.6		20.9295	3508
20.8585	278		20.9438	3629		20.865	200.1		20.9438	3533
20.8715	275		20.9581	3653		20.878	204.5		20.9581	3619
20.8845	274		20.9724	3660		20.891	192.5		20.9724	3590
20.8975	274		20.9867	3671		20.904	192.5		20.9867	3645
20.9105	274		21.001	3651		20.917	202		21.001	3576
20.9235	273		21.0153	3484		20.93	202		21.0153	3466
20.9365	271		21.0296	3595		20.943	192.3		21.0296	3483
20.9495	269		21.0439	3522		20.956	189.9		21.0439	3448
20.9625	265		21.0582	3522		20.969	205.1		21.0582	3473
20.9755	263		21.0725	3431		20.982	192.5		21.0725	3498
20.9885	261		21.0868	3606		20.995	202.4		21.0868	3571
21.0015	260		21.1011	3616		21.008	202.5		21.1011	3542
21.0145	260		21.1154	3594		21.021	196.6		21.1154	3498
21.0275	260		21.1297	3579		21.034	212		21.1297	3476
21.0405	261		21.144	3583		21.047	221		21.144	3539
21.0535	261		21.1583	3624		21.06	199.2		21.1583	3443
21.0665	262		21.1726	3590		21.073	193.1		21.1726	3511
21.0795	263		21.1869	3638		21.086	201.7		21.1869	3636
21.0925	265		21.2012	3547		21.099	198.6		21.2012	3471
21.1055	266		21.2155	3545		21.112	215.9		21.2155	3571
21.1185	268		21.2298	3621		21.125	192.2		21.2298	3437
21.1315	269		21.2441	3649		21.138	186.9		21.2441	3516
21.1445	269		21.2584	3569		21.151	204.7		21.2584	3471
21.1575	268		21.2727	3642		21.164	222.2		21.2727	3519
21.1705	266		21.287	3530		21.177	208.6		21.287	3586
21.1835	262		21.3013	3564		21.19	190.1		21.3013	3423
21.1965	257		21.3156	3544		21.203	202.4		21.3156	3491
21.2095	253		21.3299	3549		21.216	192.2		21.3299	3557
21.2225	250		21.3442	3619		21.229	201.7		21.3442	3429
21.2355	250		21.3585	3697		21.242	198.2		21.3585	3520
21.2485	252		21.3728	3664		21.255	190.9		21.3728	3557
21.2615	255		21.3871	3626		21.268	199.2		21.3871	3496
21.2745	261		21.4014	3597		21.281	177.3		21.4014	3385
21.2875	267		21.4157	3533		21.294	196.6		21.4157	3575
21.3005	274		21.43	3600		21.307	171.8		21.43	3486
21.3135	278		21.4443	3569		21.32	190.7		21.4443	3552
21.3265	278		21.4586	3574		21.333	182.3		21.4586	3598
21.3395	274		21.4729	3725		21.346	196.9		21.4729	3483
21.3525	267		21.4872	3676		21.359	191		21.4872	3608
21.3655	260		21.5015	3676		21.372	185.1		21.5015	3608
21.3785	257		21.5158	3509		21.385	211.5		21.5158	3493
21.3915	258		21.5301	3590		21.398	156.6		21.5301	3404
21.4045	263		21.5444	3441		21.411	195.4		21.5444	3497
21.4175	267		21.5587	3323		21.424	203.7		21.5587	3431
21.4305	270		21.573	3483		21.437	203.1		21.573	3412
21.4435	271		21.5873	3533		21.45	193.7		21.5873	3434
21.4565	271		21.6016	3563		21.463	193		21.6016	3415
21.4695	271		21.6159	3446		21.476	178.4		21.6159	3260
21.4825	271		21.6302	3597		21.489	180.6		21.6302	3587
21.4955	271		21.6445	3431		21.502	190.8		21.6445	3283
21.5085	270		21.6588	3587		21.515	173.5		21.6588	3473
21.5215	269		21.6731	3472		21.528	172.7		21.6731	3418
21.5345	268		21.6874	3497		21.541	195.4		21.6874	3454
21.5475	268		21.7017	3505		21.554	182		21.7017	3410
21.5605	268		21.716	3417		21.567	200.9		21.716	3389
21.5735	268		21.7303	3490		21.58	198.3		21.7303	3521
21.5865	265		21.7446	3564		21.593	197.8		21.7446	3395
21.5995	260		21.7589	3584		21.606	195.6		21.7589	3440
21.6125	255		21.7732	3557		21.619	178.9		21.7732	3542
21.6255	250		21.7875	3469		21.632	188.5		21.7875	3383
21.6385	249		21.8018	3589		21.645	195.9		21.8018	3338
21.6515	252		21.8161	3460		21.658	186.2		21.8161	3430
21.6645	258		21.8304	3664		21.671	197.5		21.8304	3461
21.6775	264		21.8447	3363		21.684	200.5		21.8447	3404
21.6905	270		21.859	3472		21.697	194.1		21.859	3496
21.7035	273		21.8733	3459		21.71	213.3		21.8733	3533
21.7165	275		21.8876	3436		21.723	208		21.8876	3457
21.7295	276		21.9019	3449		21.736	203.7		21.9019	3470
21.7425	277		21.9162	3571		21.749	193.4		21.9162	3426
21.7555	278		21.9305	3542		21.762	193.2		21.9305	3367
21.7685	279		21.9448	3382		21.775	180.6		21.9448	3485
21.7815	277		21.9591	3477		21.788	170		21.9591	3477
21.7945	273		21.9734	3561		21.801	176		21.9734	3515
21.8075	268		21.9877	3531		21.814	187.8		21.9877	3405
21.8205	264		22.002	3582		21.827	209.4		22.002	3531
21.8335	261		22.0163	3582		21.84	222.2		22.0163	3531
21.8465	259		22.0306	3435		21.853	189		22.0306	3232
21.8595	258		22.0449	3460		21.866	180.9		22.0449	3424
21.8725	257		22.0592	3377		21.879	211.4		22.0592	3311
21.8855	257		22.0735	3408		21.892	190.3		22.0735	3338
21.8985	257		22.0878	3344		21.905	168.3		22.0878	3268
21.9115	257		22.1021	3497		21.918	186.1		22.1021	3312
21.9245	258		22.1164	3478		21.931	190.1		22.1164	3265
21.9375	259		22.1307	3446		21.944	187.9		22.1307	3339
21.9505	260		22.145	3419		21.957	180.6		22.145	3333
21.9635	262		22.1593	3491		21.97	180		22.1593	3276
21.9765	265		22.1736	3447		21.983	188.6		22.1736	3251
21.9895	268		22.1879	3342		21.996	192.6		22.1879	3396
22.0025	271		22.2022	3404		22.009	193.5		22.2022	3325
22.0155	273		22.2165	3442		22.022	199.9		22.2165	3366
22.0285	272		22.2308	3373		22.035	176.5		22.2308	3375
22.0415	269		22.2451	3425		22.048	163.9		22.2451	3313
22.0545	263		22.2594	3382		22.061	176.8		22.2594	3320
22.0675	258		22.2737	3468		22.074	175.5		22.2737	3393
22.0805	255		22.288	3463		22.087	187.6		22.288	3399
22.0935	256		22.3023	3496		22.1	177		22.3023	3346
22.1065	261		22.3166	3345		22.113	174.2		22.3166	3271
22.1195	266		22.3309	3447		22.126	179.7		22.3309	3407
22.1325	268		22.3452	3398		22.139	174.5		22.3452	3436
22.1455	267		22.3595	3361		22.152	188.4		22.3595	3285
22.1585	262		22.3738	3464		22.165	186.9		22.3738	3338
22.1715	256		22.3881	3468		22.178	168.7		22.3881	3324
22.1845	253		22.4024	3355		22.191	173.9		22.4024	3366
22.1975	253		22.4167	3302		22.204	188		22.4167	3262
22.2105	255		22.431	3417		22.217	169.3		22.431	3215
22.2235	259		22.4453	3277		22.23	172.7		22.4453	3349
22.2365	261		22.4596	3418		22.243	179.4		22.4596	3342
22.2495	261		22.4739	3399		22.256	183.8		22.4739	3384
22.2625	258		22.4882	3401		22.269	189.7		22.4882	3370
22.2755	253		22.5025	3353		22.282	158		22.5025	3470
22.2885	248		22.5168	3353		22.295	165.3		22.5168	3470
22.3015	244		22.5311	3314		22.308	170.7		22.5311	3250
22.3145	242		22.5454	3360		22.321	186.2		22.5454	3387
22.3275	244		22.5597	3255		22.334	198.9		22.5597	3259
22.3405	247		22.574	3265		22.347	202.1		22.574	3271
22.3535	250		22.5883	3292		22.36	182.5		22.5883	3201
22.3665	252		22.6026	3325		22.373	193.4		22.6026	3272
22.3795	252		22.6169	3338		22.386	181.9		22.6169	3182
22.3925	250		22.6312	3229		22.399	186		22.6312	3189
22.4055	248		22.6455	3318		22.412	193		22.6455	3239
22.4185	246		22.6598	3271		22.425	197.5		22.6598	3191
22.4315	245		22.6741	3334		22.438	168.9		22.6741	3230
22.4445	244		22.6884	3238		22.451	186.8		22.6884	3291
22.4575	245		22.7027	3402		22.464	182.7		22.7027	3278
22.4705	246		22.717	3307		22.477	165.9		22.717	3243
22.4835	249		22.7313	3322		22.49	171.3		22.7313	3246
22.4965	253		22.7456	3329		22.503	177.4		22.7456	3273
22.5095	255		22.7599	3270		22.516	206.2		22.7599	3196
22.5225	254		22.7742	3263		22.529	197.5		22.7742	3232
22.5355	251		22.7885	3269		22.542	179		22.7885	3260
22.5485	247		22.8028	3336		22.555	196.7		22.8028	3320
22.5615	245		22.8171	3253		22.568	194.5		22.8171	3403
22.5745	247		22.8314	3289		22.581	198.4		22.8314	3188
22.5875	252		22.8457	3309		22.594	177.6		22.8457	3217
22.6005	258		22.86	3323		22.607	203.2		22.86	3241
22.6135	264		22.8743	3244		22.62	188		22.8743	3280
22.6265	267		22.8886	3353		22.633	186.3		22.8886	3350
22.6395	269		22.9029	3234		22.646	163.8		22.9029	3254
22.6525	269		22.9172	3315		22.659	202.8		22.9172	3261
22.6655	268		22.9315	3330		22.672	185		22.9315	3199
22.6785	265		22.9458	3381		22.685	184		22.9458	3229
22.6915	261		22.9601	3317		22.698	198.7		22.9601	3385
22.7045	257		22.9744	3353		22.711	171.9		22.9744	3344
22.7175	252		22.9887	3318		22.724	175.8		22.9887	3188
22.7305	248		23.003	3225		22.737	202.6		23.003	3260
22.7435	244		23.0173	3305		22.75	189		23.0173	3293
22.7565	241		23.0316	3305		22.763	204.7		23.0316	3293
22.7695	238		23.0459	3240		22.776	181.2		23.0459	3130
22.7825	237		23.0602	3174		22.789	185.4		23.0602	3222
22.7955	237		23.0745	3210		22.802	187.8		23.0745	3071
22.8085	239		23.0888	3290		22.815	180.9		23.0888	3062
22.8215	242		23.1031	3185		22.828	173.8		23.1031	2977
22.8345	245		23.1174	3230		22.841	191.3		23.1174	3033
22.8475	247		23.1317	3236		22.854	171.6		23.1317	3213
22.8605	247		23.146	3167		22.867	176.5		23.146	3218
22.8735	246		23.1603	3083		22.88	171.3		23.1603	3055
22.8865	244		23.1746	3251		22.893	154.2		23.1746	3250
22.8995	243		23.1889	3248		22.906	176.4		23.1889	3127
22.9125	245		23.2032	3260		22.919	174.7		23.2032	3171
22.9255	248		23.2175	3223		22.932	184.2		23.2175	3282
22.9385	251		23.2318	3252		22.945	197.3		23.2318	3178
22.9515	253		23.2461	3166		22.958	185.9		23.2461	3250
22.9645	253		23.2604	3133		22.971	178.1		23.2604	3055
22.9775	252		23.2747	3206		22.984	186.9		23.2747	3091
22.9905	251		23.289	3259		22.997	183.2		23.289	3157
23.0035	250		23.3033	3254		23.01	195.1		23.3033	3161
23.0165	252		23.3176	3312		23.023	177.3		23.3176	3080
23.0295	254		23.3319	3232		23.036	174.8		23.3319	3190
23.0425	257		23.3462	3186		23.049	176.3		23.3462	3139
23.0555	260		23.3605	3109		23.062	193.5		23.3605	3195
23.0685	261		23.3748	3237		23.075	194.1		23.3748	3079
23.0815	262		23.3891	3229		23.088	175.3		23.3891	3184
23.0945	261		23.4034	3202		23.101	165.3		23.4034	3138
23.1075	260		23.4177	3206		23.114	183.2		23.4177	3178
23.1205	258		23.432	3219		23.127	189.7		23.432	3194
23.1335	255		23.4463	3307		23.14	177.7		23.4463	3082
23.1465	252		23.4606	3263		23.153	166.3		23.4606	3050
23.1595	250		23.4749	3237		23.166	181.7		23.4749	3172
23.1725	248		23.4892	3176		23.179	201		23.4892	3104
23.1855	246		23.5035	3147		23.192	203.6		23.5035	3173
23.1985	245		23.5178	3244		23.205	184.8		23.5178	3146
23.2115	244		23.5321	3272		23.218	178.2		23.5321	3195
23.2245	243		23.5464	3272		23.231	174.6		23.5464	3195
23.2375	243		23.5607	3050		23.244	172.9		23.5607	2962
23.2505	242		23.575	3090		23.257	174.9		23.575	3069
23.2635	242		23.5893	3083		23.27	177.3		23.5893	3032
23.2765	241		23.6036	3120		23.283	185.3		23.6036	3047
23.2895	240		23.6179	3033		23.296	184.2		23.6179	3003
23.3025	239		23.6322	3149		23.309	173.9		23.6322	3026
23.3155	238		23.6465	3082		23.322	178.1		23.6465	2979
23.3285	236		23.6608	3065		23.335	182.6		23.6608	3135
23.3415	235		23.6751	3116		23.348	175.6		23.6751	3138
23.3545	234		23.6894	3172		23.361	179.2		23.6894	3013
23.3675	234		23.7037	3083		23.374	189.7		23.7037	2967
23.3805	234		23.718	3101		23.387	169.5		23.718	3038
23.3935	236		23.7323	3240		23.4	155.5		23.7323	3082
23.4065	238		23.7466	3153		23.413	178		23.7466	3008
23.4195	241		23.7609	3050		23.426	176.1		23.7609	3063
23.4325	242		23.7752	3067		23.439	172.5		23.7752	3053
23.4455	242		23.7895	3063		23.452	180.6		23.7895	2985
23.4585	241		23.8038	3189		23.465	171.6		23.8038	2958
23.4715	240		23.8181	3098		23.478	153.2		23.8181	3073
23.4845	238		23.8324	3057		23.491	168.1		23.8324	3023
23.4975	237		23.8467	3167		23.504	186.3		23.8467	3098
23.5105	236		23.861	3261		23.517	167.8		23.861	3077
23.5235	235		23.8753	3221		23.53	163		23.8753	3084
23.5365	235		23.8896	3154		23.543	165.7		23.8896	3083
23.5495	235		23.9039	3185		23.556	169.3		23.9039	2981
23.5625	236		23.9182	3155		23.569	177.1		23.9182	3025
23.5755	237		23.9325	3011		23.582	180.7		23.9325	3078
23.5885	238		23.9468	3055		23.595	175.9		23.9468	2999
23.6015	239		23.9611	3097		23.608	185.6		23.9611	3050
23.6145	241		23.9754	3201		23.621	186.8		23.9754	3024
23.6275	242		23.9897	3139		23.634	173		23.9897	3025
23.6405	243		24.004	3110		23.647	174.8		24.004	3014
23.6535	244		24.0183	3153		23.66	171.2		24.0183	3088
23.6665	246		24.0326	3180		23.673	148.7		24.0326	3061
23.6795	247		24.0469	3180		23.686	166.3		24.0469	3061
23.6925	249		24.0612	3019		23.699	174.2		24.0612	2817
23.7055	251		24.0755	2909		23.712	175.4		24.0755	2910
23.7185	252		24.0898	3075		23.725	173.5		24.0898	2994
23.7315	251		24.1041	2981		23.738	160.9		24.1041	3047
23.7445	250		24.1184	2993		23.751	168.6		24.1184	2958
23.7575	248		24.1327	2966		23.764	166		24.1327	2911
23.7705	245		24.147	3062		23.777	161.6		24.147	2964
23.7835	241		24.1613	3021		23.79	165.3		24.1613	2874
23.7965	237		24.1756	3159		23.803	166		24.1756	2957
23.8095	233		24.1899	3013		23.816	158.4		24.1899	2921
23.8225	230		24.2042	3021		23.829	149.2		24.2042	2983
23.8355	230		24.2185	2974		23.842	165.6		24.2185	2939
23.8485	231		24.2328	3030		23.855	165.1		24.2328	2859
23.8615	234		24.2471	3052		23.868	193.7		24.2471	2943
23.8745	237		24.2614	3024		23.881	189.9		24.2614	2948
23.8875	239		24.2757	2949		23.894	177.3		24.2757	2942
23.9005	240		24.29	2945		23.907	181.5		24.29	2889
23.9135	239		24.3043	2931		23.92	172		24.3043	2891
23.9265	238		24.3186	3073		23.933	150.9		24.3186	3048
23.9395	236		24.3329	2980		23.946	147.5		24.3329	3062
23.9525	235		24.3472	2966		23.959	166.1		24.3472	2945
23.9655	235		24.3615	2913		23.972	171		24.3615	2894
23.9785	235		24.3758	3040		23.985	167		24.3758	3046
23.9915	235		24.3901	3065		23.998	185.8		24.3901	3019
24.0045	236		24.4044	3027		24.011	145		24.4044	2931
24.0175	236		24.4187	2949		24.024	155.6		24.4187	3012
24.0305	237		24.433	3026		24.037	151.2		24.433	2950
24.0435	237		24.4473	3066		24.05	156.7		24.4473	2886
24.0565	238		24.4616	2930		24.063	187		24.4616	2896
24.0695	238		24.4759	3061		24.076	202		24.4759	2934
24.0825	238		24.4902	2994		24.089	163.5		24.4902	2924
24.0955	237		24.5045	3063		24.102	170.9		24.5045	2951
24.1085	237		24.5188	3141		24.115	187.3		24.5188	2927
24.1215	237		24.5331	3090		24.128	183.7		24.5331	2986
24.1345	237		24.5474	3012		24.141	166.3		24.5474	2906
24.1475	238		24.5617	3012		24.154	151.8		24.5617	2906
24.1605	239		24.576	2911		24.167	156		24.576	2833
24.1735	240		24.5903	2954		24.18	188.4		24.5903	2748
24.1865	241		24.6046	3039		24.193	176.4		24.6046	2825
24.1995	242		24.6189	2892		24.206	166.4		24.6189	2800
24.2125	243		24.6332	2851		24.219	174.8		24.6332	2780
24.2255	243		24.6475	2942		24.232	170.5		24.6475	2811
24.2385	243		24.6618	2904		24.245	168.2		24.6618	2905
24.2515	243		24.6761	2948		24.258	170.4		24.6761	2735
24.2645	242		24.6904	2868		24.271	171.8		24.6904	2811
24.2775	241		24.7047	2947		24.284	178.9		24.7047	2866
24.2905	240		24.719	2972		24.297	171.9		24.719	2864
24.3035	238		24.7333	2946		24.31	169		24.7333	2869
24.3165	238		24.7476	2993		24.323	147.6		24.7476	2930
24.3295	237		24.7619	2913		24.336	172.1		24.7619	2817
24.3425	238		24.7762	2843		24.349	166.7		24.7762	2870
24.3555	239		24.7905	2964		24.362	158.6		24.7905	2817
24.3685	241		24.8048	2948		24.375	152.4		24.8048	2853
24.3815	243		24.8191	2933		24.388	141		24.8191	2827
24.3945	244		24.8334	3043		24.401	170.3		24.8334	2907
24.4075	243		24.8477	2897		24.414	159.2		24.8477	2888
24.4205	242		24.862	2922		24.427	144.7		24.862	2743
24.4335	240		24.8763	2836		24.44	152.4		24.8763	2876
24.4465	237		24.8906	2871		24.453	164.7		24.8906	2914
24.4595	236		24.9049	2815		24.466	165.9		24.9049	2870
24.4725	235		24.9192	2955		24.479	170.2		24.9192	2892
24.4855	236		24.9335	2874		24.492	162.4		24.9335	2802
24.4985	239		24.9478	2887		24.505	170		24.9478	2877
24.5115	242		24.9621	2960		24.518	164.7		24.9621	2835
24.5245	246		24.9764	3003		24.531	169.1		24.9764	2890
24.5375	248		24.9907	2887		24.544	184.6		24.9907	2829
24.5505	247		25.005	2946		24.557	168.9		25.005	2871
24.5635	244		25.0193	2759		24.57	170		25.0193	2701
24.5765	240		25.0336	2944		24.583	168.4		25.0336	2785
24.5895	236		25.0479	3010		24.596	160.8		25.0479	2854
24.6025	233		25.0622	3030		24.609	165.5		25.0622	2926
24.6155	230		25.0765	3030		24.622	170.6		25.0765	2926
24.6285	226		25.0908	2824		24.635	170.5		25.0908	2834
24.6415	222		25.1051	2916		24.648	171.9		25.1051	2780
24.6545	219		25.1194	2956		24.661	174.2		25.1194	2745
24.6675	216		25.1337	2819		24.674	175.2		25.1337	2793
24.6805	217		25.148	2765		24.687	169.9		25.148	2732
24.6935	220		25.1623	2794		24.7	153.8		25.1623	2761
24.7065	225		25.1766	2838		24.713	163.2		25.1766	2860
24.7195	229		25.1909	2851		24.726	177		25.1909	2852
24.7325	231		25.2052	2914		24.739	175.1		25.2052	2731
24.7455	232		25.2195	2838		24.752	183.8		25.2195	2715
24.7585	231		25.2338	2900		24.765	184.8		25.2338	2735
24.7715	230		25.2481	2852		24.778	172		25.2481	2824
24.7845	228		25.2624	2808		24.791	178.9		25.2624	2901
24.7975	227		25.2767	2859		24.804	187.2		25.2767	2741
24.8105	225		25.291	2805		24.817	176.5		25.291	2707
24.8235	223		25.3053	2913		24.83	174		25.3053	2756
24.8365	222		25.3196	2954		24.843	165.4		25.3196	2717
24.8495	221		25.3339	2815		24.856	174		25.3339	2731
24.8625	223		25.3482	2811		24.869	176.3		25.3482	2801
24.8755	228		25.3625	2706		24.882	171.3		25.3625	2839
24.8885	234		25.3768	2858		24.895	156.3		25.3768	2814
24.9015	239		25.3911	2832		24.908	162.5		25.3911	2806
24.9145	242		25.4054	2765		24.921	144		25.4054	2822
24.9275	243		25.4197	2846		24.934	152.5		25.4197	2726
24.9405	239		25.434	2870		24.947	162.3		25.434	2790
24.9535	234		25.4483	2841		24.96	160.5		25.4483	2732
24.9665	228		25.4626	2964		24.973	158.6		25.4626	2781
24.9795	222		25.4769	2801		24.986	170.6		25.4769	2637
24.9925	218		25.4912	2892		24.999	154.3		25.4912	2805
25.0055	214		25.5055	2806		25.012	158.1		25.5055	2718
25.0185	210		25.5198	2775		25.025	157.4		25.5198	2778
25.0315	208		25.5341	2868		25.038	162.6		25.5341	2809
25.0445	207		25.5484	2872		25.051	147.5		25.5484	2734
25.0575	207		25.5627	2879		25.064	163.3		25.5627	2731
25.0705	210		25.577	2998		25.077	165.8		25.577	2820
25.0835	216		25.5913	2998		25.09	175.4		25.5913	2820
25.0965	223		25.6056	2735		25.103	199.7		25.6056	2752
25.1095	230		25.6199	2836		25.116	167.6		25.6199	2692
25.1225	235		25.6342	2798		25.129	167.1		25.6342	2664
25.1355	236		25.6485	2733		25.142	179.2		25.6485	2701
25.1485	234		25.6628	2703		25.155	158.7		25.6628	2698
25.1615	232		25.6771	2718		25.168	171.9		25.6771	2615
25.1745	230		25.6914	2753		25.181	160.8		25.6914	2741
25.1875	231		25.7057	2771		25.194	158.9		25.7057	2780
25.2005	234		25.72	2764		25.207	158.4		25.72	2716
25.2135	236		25.7343	2845		25.22	162.1		25.7343	2710
25.2265	236		25.7486	2755		25.233	129.5		25.7486	2705
25.2395	232		25.7629	2780		25.246	141.7		25.7629	2764
25.2525	227		25.7772	2749		25.259	159.5		25.7772	2730
25.2655	222		25.7915	2809		25.272	138.5		25.7915	2698
25.2785	219		25.8058	2854		25.285	174		25.8058	2668
25.2915	219		25.8201	2787		25.298	171		25.8201	2717
25.3045	222		25.8344	2771		25.311	147.4		25.8344	2743
25.3175	227		25.8487	2784		25.324	164.5		25.8487	2705
25.3305	231		25.863	2732		25.337	151.5		25.863	2671
25.3435	233		25.8773	2796		25.35	154.8		25.8773	2584
25.3565	233		25.8916	2847		25.363	168.2		25.8916	2610
25.3695	231		25.9059	2698		25.376	167.1		25.9059	2655
25.3825	227		25.9202	2741		25.389	139.2		25.9202	2783
25.3955	222		25.9345	2851		25.402	169		25.9345	2748
25.4085	219		25.9488	2802		25.415	172.9		25.9488	2615
25.4215	217		25.9631	2810		25.428	156		25.9631	2621
25.4345	219		25.9774	2763		25.441	153.1		25.9774	2625
25.4475	221		25.9917	2739		25.454	176.6		25.9917	2779
25.4605	223		26.006	2774		25.467	167		26.006	2674
25.4735	223		26.0203	2749		25.48	158.2		26.0203	2584
25.4865	221		26.0346	2769		25.493	170.5		26.0346	2588
25.4995	217		26.0489	2823		25.506	157.1		26.0489	2691
25.5125	214		26.0632	2814		25.519	148.2		26.0632	2654
25.5255	213		26.0775	2710		25.532	159.2		26.0775	2712
25.5385	214		26.0918	2789		25.545	146.7		26.0918	2697
25.5515	217		26.1061	2738		25.558	161.3		26.1061	2594
25.5645	222		26.1204	2682		25.571	151.1		26.1204	2660
25.5775	226		26.1347	2660		25.584	138.5		26.1347	2615
25.5905	229		26.149	2734		25.597	153.6		26.149	2564
25.6035	231		26.1633	2601		25.61	160.5		26.1633	2541
25.6165	230		26.1776	2691		25.623	152.8		26.1776	2507
25.6295	229		26.1919	2678		25.636	154.4		26.1919	2617
25.6425	228		26.2062	2605		25.649	159.6		26.2062	2579
25.6555	226		26.2205	2680		25.662	163.9		26.2205	2579
25.6685	226		26.2348	2598		25.675	179.1		26.2348	2543
25.6815	225		26.2491	2706		25.688	175.2		26.2491	2524
25.6945	225		26.2634	2632		25.701	173.1		26.2634	2553
25.7075	225		26.2777	2712		25.714	163.2		26.2777	2515
25.7205	225		26.292	2704		25.727	166		26.292	2664
25.7335	226		26.3063	2593		25.74	168.7		26.3063	2685
25.7465	228		26.3206	2781		25.753	158.3		26.3206	2619
25.7595	230		26.3349	2638		25.766	148.5		26.3349	2555
25.7725	233		26.3492	2671		25.779	149.1		26.3492	2662
25.7855	235		26.3635	2678		25.792	157.2		26.3635	2634
25.7985	236		26.3778	2723		25.805	161.6		26.3778	2558
25.8115	235		26.3921	2739		25.818	163.8		26.3921	2595
25.8245	232		26.4064	2722		25.831	157.9		26.4064	2577
25.8375	228		26.4207	2657		25.844	166.3		26.4207	2642
25.8505	225		26.435	2643		25.857	169.2		26.435	2643
25.8635	224		26.4493	2669		25.87	169.6		26.4493	2654
25.8765	223		26.4636	2762		25.883	174.5		26.4636	2605
25.8895	223		26.4779	2653		25.896	165.8		26.4779	2568
25.9025	222		26.4922	2703		25.909	163.8		26.4922	2550
25.9155	221		26.5065	2664		25.922	166.9		26.5065	2564
25.9285	219		26.5208	2581		25.935	159.9		26.5208	2500
25.9415	217		26.5351	2728		25.948	162		26.5351	2598
25.9545	215		26.5494	2716		25.961	171		26.5494	2530
25.9675	214		26.5637	2730		25.974	174		26.5637	2600
25.9805	214		26.578	2662		25.987	164.7		26.578	2537
25.9935	216		26.5923	2747		26	159		26.5923	2604
26.0065	220		26.6066	2747		26.013	158.4		26.6066	2604
26.0195	225		26.6209	2747		26.026	145.5		26.6209	2577
26.0325	228		26.6352	2668		26.039	153.4		26.6352	2552
26.0455	229		26.6495	2556		26.052	176.7		26.6495	2516
26.0585	226		26.6638	2556		26.065	175.8		26.6638	2589
26.0715	220		26.6781	2645		26.078	161.4		26.6781	2417
26.0845	215		26.6924	2675		26.091	157.3		26.6924	2522
26.0975	213		26.7067	2645		26.104	152.3		26.7067	2574
26.1105	215		26.721	2606		26.117	158.6		26.721	2523
26.1235	220		26.7353	2582		26.13	159.4		26.7353	2589
26.1365	226		26.7496	2716		26.143	153.7		26.7496	2607
26.1495	230		26.7639	2579		26.156	157		26.7639	2630
26.1625	233		26.7782	2575		26.169	155.7		26.7782	2634
26.1755	232		26.7925	2683		26.182	155.2		26.7925	2507
26.1885	230		26.8068	2707		26.195	174.5		26.8068	2505
26.2015	227		26.8211	2597		26.208	164.2		26.8211	2520
26.2145	224		26.8354	2549		26.221	153.9		26.8354	2590
26.2275	221		26.8497	2511		26.234	156.6		26.8497	2551
26.2405	219		26.864	2668		26.247	155.8		26.864	2567
26.2535	219		26.8783	2649		26.26	149.5		26.8783	2556
26.2665	222		26.8926	2661		26.273	149.3		26.8926	2550
26.2795	226		26.9069	2695		26.286	152.8		26.9069	2601
26.2925	230		26.9212	2630		26.299	154.5		26.9212	2615
26.3055	233		26.9355	2597		26.312	155.5		26.9355	2512
26.3185	234		26.9498	2702		26.325	139.3		26.9498	2632
26.3315	232		26.9641	2754		26.338	171.8		26.9641	2584
26.3445	230		26.9784	2691		26.351	145.9		26.9784	2592
26.3575	228		26.9927	2681		26.364	143.7		26.9927	2638
26.3705	228		27.007	2649		26.377	154.3		27.007	2611
26.3835	228		27.0213	2610		26.39	142.6		27.0213	2578
26.3965	228		27.0356	2580		26.403	127.1		27.0356	2595
26.4095	226		27.0499	2624		26.416	141		27.0499	2571
26.4225	222		27.0642	2634		26.429	156		27.0642	2574
26.4355	217		27.0785	2617		26.442	174.4		27.0785	2512
26.4485	212		27.0928	2685		26.455	163		27.0928	2578
26.4615	208		27.1071	2723		26.468	163.6		27.1071	2574
26.4745	206		27.1214	2723		26.481	167.4		27.1214	2574
26.4875	206		27.1357	2713		26.494	151.1		27.1357	2537
26.5005	206		27.15	2706		26.507	142.7		27.15	2549
26.5135	207		27.1643	2594		26.52	163.3		27.1643	2613
26.5265	209		27.1786	2550		26.533	152.9		27.1786	2564
26.5395	211		27.1929	2596		26.546	169.7		27.1929	2494
26.5525	213		27.2072	2671		26.559	163.2		27.2072	2595
26.5655	216		27.2215	2653		26.572	138.7		27.2215	2606
26.5785	218		27.2358	2597		26.585	169.8		27.2358	2541
26.5915	218		27.2501	2676		26.598	154.1		27.2501	2643
26.6045	217		27.2644	2632		26.611	180.8		27.2644	2564
26.6175	215		27.2787	2705		26.624	165.3		27.2787	2591
26.6305	213		27.293	2705		26.637	154.3		27.293	2526
26.6435	211		27.3073	2688		26.65	156.9		27.3073	2599
26.6565	210		27.3216	2659		26.663	164.6		27.3216	2572
26.6695	211		27.3359	2629		26.676	151.8		27.3359	2625
26.6825	212		27.3502	2570		26.689	146.3		27.3502	2558
26.6955	214		27.3645	2713		26.702	191.2		27.3645	2630
26.7085	216		27.3788	2763		26.715	167.6		27.3788	2558
26.7215	217		27.3931	2810		26.728	159.6		27.3931	2631
26.7345	219		27.4074	2742		26.741	166.1		27.4074	2583
26.7475	220		27.4217	2714		26.754	169.7		27.4217	2684
26.7605	221		27.436	2804		26.767	159.5		27.436	2718
26.7735	223		27.4503	2685		26.78	164		27.4503	2670
26.7865	224		27.4646	2747		26.793	175.2		27.4646	2555
26.7995	225		27.4789	2873		26.806	173.6		27.4789	2669
26.8125	226		27.4932	2828		26.819	158		27.4932	2748
26.8255	227		27.5075	2707		26.832	136.1		27.5075	2642
26.8385	227		27.5218	2862		26.845	138.5		27.5218	2657
26.8515	225		27.5361	2788		26.858	147.2		27.5361	2711
26.8645	223		27.5504	2799		26.871	164.9		27.5504	2680
26.8775	220		27.5647	2824		26.884	161.2		27.5647	2725
26.8905	217		27.579	2809		26.897	152		27.579	2720
26.9035	214		27.5933	2883		26.91	173.7		27.5933	2814
26.9165	211		27.6076	2913		26.923	154.6		27.6076	2804
26.9295	209		27.6219	2913		26.936	137.8		27.6219	2804
26.9425	208		27.6362	2893		26.949	155.6		27.6362	2731
26.9555	208		27.6505	2807		26.962	150		27.6505	2793
26.9685	209		27.6648	2840		26.975	157.9		27.6648	2786
26.9815	212		27.6791	2902		26.988	145.4		27.6791	2851
26.9945	217		27.6934	2791		27.001	147.7		27.6934	2711
27.0075	223		27.7077	2855		27.014	140.4		27.7077	2800
27.0205	229		27.722	2968		27.027	143.1		27.722	2905
27.0335	234		27.7363	2858		27.04	145.7		27.7363	2994
27.0465	236		27.7506	3048		27.053	137.8		27.7506	2935
27.0595	236		27.7649	2990		27.066	146.3		27.7649	2824
27.0725	232		27.7792	2977		27.079	162.5		27.7792	2875
27.0855	226		27.7935	3124		27.092	169.3		27.7935	2943
27.0985	219		27.8078	3060		27.105	171.2		27.8078	2995
27.1115	214		27.8221	3195		27.118	167.2		27.8221	3115
27.1245	211		27.8364	3171		27.131	164		27.8364	2977
27.1375	211		27.8507	3149		27.144	165.8		27.8507	2960
27.1505	213		27.865	3253		27.157	159.5		27.865	3092
27.1635	214		27.8793	3302		27.17	153.4		27.8793	3190
27.1765	215		27.8936	3401		27.183	164.7		27.8936	3219
27.1895	213		27.9079	3373		27.196	169.1		27.9079	3100
27.2025	210		27.9222	3562		27.209	156.4		27.9222	3174
27.2155	206		27.9365	3475		27.222	161.1		27.9365	3262
27.2285	203		27.9508	3455		27.235	162.7		27.9508	3401
27.2415	201		27.9651	3754		27.248	162.6		27.9651	3501
27.2545	201		27.9794	3763		27.261	162.1		27.9794	3571
27.2675	202		27.9937	3792		27.274	172.9		27.9937	3595
27.2805	204		28.008	4032		27.287	174.9		28.008	3692
27.2935	207		28.0223	4096		27.3	155.4		28.0223	3809
27.3065	211		28.0366	4313		27.313	158.4		28.0366	3958
27.3195	214		28.0509	4380		27.326	166.7		28.0509	4072
27.3325	218		28.0652	4546		27.339	165		28.0652	4200
27.3455	223		28.0795	4679		27.352	146.9		28.0795	4395
27.3585	228		28.0938	4924		27.365	157.5		28.0938	4529
27.3715	232		28.1081	5128		27.378	177.1		28.1081	4599
27.3845	236		28.1224	5505		27.391	170.4		28.1224	4857
27.3975	237		28.1367	5505		27.404	171		28.1367	4857
27.4105	235		28.151	5913		27.417	174.8		28.151	5391
27.4235	232		28.1653	6383		27.43	178.1		28.1653	5542
27.4365	227		28.1796	6527		27.443	173		28.1796	5960
27.4495	224		28.1939	6842		27.456	171.6		28.1939	6356
27.4625	224		28.2082	7308		27.469	172.4		28.2082	6668
27.4755	227		28.2225	7593		27.482	187.2		28.2225	7234
27.4885	233		28.2368	8383		27.495	203.4		28.2368	7567
27.5015	239		28.2511	8871		27.508	191.2		28.2511	7939
27.5145	244		28.2654	9358		27.521	175.3		28.2654	8542
27.5275	247		28.2797	10197		27.534	189.5		28.2797	9185
27.5405	249		28.294	10393		27.547	176		28.294	9952
27.5535	249		28.3083	11232		27.56	179.8		28.3083	10477
27.5665	250		28.3226	11893		27.573	191		28.3226	11264
27.5795	249		28.3369	12634		27.586	195.2		28.3369	11953
27.5925	248		28.3512	13045		27.599	192.1		28.3512	12647
27.6055	247		28.3655	13818		27.612	173		28.3655	13487
27.6185	245		28.3798	14236		27.625	183		28.3798	13909
27.6315	244		28.3941	14521		27.638	183.4		28.3941	14695
27.6445	244		28.4084	15244		27.651	185.2		28.4084	15298
27.6575	245		28.4227	15442		27.664	180.5		28.4227	15819
27.6705	247		28.437	15723		27.677	164.2		28.437	16367
27.6835	252		28.4513	15779		27.69	197.3		28.4513	16643
27.6965	258		28.4656	15575		27.703	198.4		28.4656	16734
27.7095	263		28.4799	15445		27.716	195.4		28.4799	17241
27.7225	266		28.4942	15188		27.729	200.5		28.4942	16940
27.7355	266		28.5085	15025		27.742	212.9		28.5085	16986
27.7485	265		28.5228	14567		27.755	192.5		28.5228	16952
27.7615	264		28.5371	13727		27.768	196.4		28.5371	16359
27.7745	266		28.5514	13374		27.781	201.5		28.5514	15674
27.7875	271		28.5657	12504		27.794	212.2		28.5657	15197
27.8005	277		28.58	11882		27.807	185		28.58	14651
27.8135	283		28.5943	11313		27.82	200.4		28.5943	13977
27.8265	285		28.6086	10603		27.833	242.7		28.6086	13185
27.8395	286		28.6229	10083		27.846	206		28.6229	12337
27.8525	284		28.6372	9140		27.859	206.3		28.6372	11623
27.8655	283		28.6515	9140		27.872	213.8		28.6515	11623
27.8785	282		28.6658	7963		27.885	209.3		28.6658	10083
27.8915	282		28.6801	7394		27.898	226		28.6801	9336
27.9045	282		28.6944	6917		27.911	222		28.6944	8856
27.9175	283		28.7087	6392		27.924	200.2		28.7087	8057
27.9305	283		28.723	5997		27.937	281.4		28.723	7584
27.9435	284		28.7373	5448		27.95	262.6		28.7373	7093
27.9565	285		28.7516	5406		27.963	246.6		28.7516	6577
27.9695	286		28.7659	5028		27.976	232.7		28.7659	6055
27.9825	288		28.7802	4737		27.989	262.1		28.7802	5745
27.9955	291		28.7945	4597		28.002	250		28.7945	5412
28.0085	296		28.8088	4383		28.015	261		28.8088	5230
28.0215	302		28.8231	4317		28.028	272.9		28.8231	4934
28.0345	311		28.8374	4072		28.041	281.2		28.8374	4691
28.0475	323		28.8517	3841		28.054	287.3		28.8517	4382
28.0605	335		28.866	3755		28.067	306.5		28.866	4224
28.0735	346		28.8803	3700		28.08	341.2		28.8803	3978
28.0865	354		28.8946	3586		28.093	333.1		28.8946	3904
28.0995	360		28.9089	3340		28.106	340.4		28.9089	3707
28.1125	366		28.9232	3454		28.119	376.5		28.9232	3632
28.1255	377		28.9375	3276		28.132	390.5		28.9375	3554
28.1385	394		28.9518	3294		28.145	362.4		28.9518	3639
28.1515	417		28.9661	3176		28.158	390.1		28.9661	3439
28.1645	442		28.9804	3132		28.171	444.5		28.9804	3369
28.1775	466		28.9947	3126		28.184	465.5		28.9947	3149
28.1905	485		29.009	3199		28.197	500.8		29.009	3171
28.2035	501		29.0233	3069		28.21	531.6		29.0233	3133
28.2165	517		29.0376	2998		28.223	542.6		29.0376	3107
28.2295	536		29.0519	3065		28.236	623		29.0519	3123
28.2425	562		29.0662	2911		28.249	623		29.0662	2985
28.2555	595		29.0805	2890		28.262	706.3		29.0805	2947
28.2685	637		29.0948	2857		28.275	788.4		29.0948	2982
28.2815	686		29.1091	2851		28.288	856.2		29.1091	2957
28.2945	742		29.1234	2804		28.301	942.1		29.1234	3027
28.3075	806		29.1377	2882		28.314	1055.2		29.1377	3016
28.3205	877		29.152	2737		28.327	1164		29.152	2957
28.3335	955		29.1663	2737		28.34	1214.5		29.1663	2957
28.3465	1040		29.1806	2712		28.353	1323.8		29.1806	2821
28.3595	1131		29.1949	2659		28.366	1505		29.1949	2750
28.3725	1230		29.2092	2700		28.379	1606.8		29.2092	2693
28.3855	1334		29.2235	2673		28.392	1708.6		29.2235	2615
28.3985	1444		29.2378	2694		28.405	1819.3		29.2378	2546
28.4115	1559		29.2521	2656		28.418	1923.2		29.2521	2616
28.4245	1678		29.2664	2639		28.431	2001.8		29.2664	2706
28.4375	1802		29.2807	2628		28.444	2126.9		29.2807	2500
28.4505	1931		29.295	2648		28.457	2181.4		29.295	2604
28.4635	2064		29.3093	2645		28.47	2207.1		29.3093	2614
28.4765	2202		29.3236	2587		28.483	2314.6		29.3236	2506
28.4895	2337		29.3379	2560		28.496	2386.4		29.3379	2571
28.5025	2461		29.3522	2546		28.509	2341.2		29.3522	2510
28.5155	2564		29.3665	2554		28.522	2232.4		29.3665	2414
28.5285	2640		29.3808	2582		28.535	2195.4		29.3808	2613
28.5415	2686		29.3951	2553		28.548	2110.7		29.3951	2614
28.5545	2699		29.4094	2533		28.561	2011.5		29.4094	2426
28.5675	2682		29.4237	2514		28.574	1929.4		29.4237	2465
28.5805	2634		29.438	2541		28.587	1812.2		29.438	2555
28.5935	2557		29.4523	2527		28.6	1677.7		29.4523	2473
28.6065	2456		29.4666	2547		28.613	1532.4		29.4666	2510
28.6195	2338		29.4809	2394		28.626	1470.3		29.4809	2481
28.6325	2210		29.4952	2493		28.639	1365		29.4952	2428
28.6455	2078		29.5095	2486		28.652	1218.7		29.5095	2410
28.6585	1944		29.5238	2570		28.665	1129.7		29.5238	2435
28.6715	1808		29.5381	2506		28.678	1024.3		29.5381	2446
28.6845	1672		29.5524	2436		28.691	914.6		29.5524	2412
28.6975	1534		29.5667	2425		28.704	831.5		29.5667	2375
28.7105	1398		29.581	2421		28.717	741		29.581	2373
28.7235	1269		29.5953	2354		28.73	678.9		29.5953	2402
28.7365	1151		29.6096	2537		28.743	637.1		29.6096	2382
28.7495	1043		29.6239	2381		28.756	605.8		29.6239	2428
28.7625	946		29.6382	2511		28.769	561		29.6382	2455
28.7755	860		29.6525	2531		28.782	509.6		29.6525	2410
28.7885	786		29.6668	2488		28.795	465.6		29.6668	2449
28.8015	722		29.6811	2383		28.808	429.5		29.6811	2367
28.8145	667		29.6954	2427		28.821	403.4		29.6954	2339
28.8275	620		29.7097	2444		28.834	377.7		29.7097	2298
28.8405	580		29.724	2362		28.847	368		29.724	2345
28.8535	546		29.7383	2381		28.86	383.6		29.7383	2167
28.8665	516		29.7526	2306		28.873	356.1		29.7526	2294
28.8795	491		29.7669	2393		28.886	339.5		29.7669	2317
28.8925	469		29.7812	2409		28.899	314.3		29.7812	2253
28.9055	450		29.7955	2362		28.912	304.7		29.7955	2341
28.9185	432		29.8098	2353		28.925	279.2		29.8098	2353
28.9315	416		29.8241	2378		28.938	278.2		29.8241	2216
28.9445	401		29.8384	2295		28.951	290.8		29.8384	2292
28.9575	386		29.8527	2411		28.964	267.6		29.8527	2256
28.9705	373		29.867	2408		28.977	261.6		29.867	2340
28.9835	360		29.8813	2377		28.99	232.1		29.8813	2306
28.9965	347		29.8956	2289		29.003	260.7		29.8956	2310
29.0095	336		29.9099	2277		29.016	238.4		29.9099	2311
29.0225	326		29.9242	2275		29.029	238.5		29.9242	2272
29.0355	318		29.9385	2384		29.042	253.9		29.9385	2242
29.0485	313		29.9528	2319		29.055	222.1		29.9528	2219
29.0615	310		29.9671	2267		29.068	220.7		29.9671	2300
29.0745	310		29.9814	2266		29.081	207.3		29.9814	2317
29.0875	309		29.9957	2345		29.094	241.9		29.9957	2226
29.1005	306		30.01	2309		29.107	229.8		30.01	2261
29.1135	300		30.0243	2277		29.12	207.3		30.0243	2215
29.1265	292		30.0386	2275		29.133	210.9		30.0386	2283
29.1395	284		30.0529	2343		29.146	208.2		30.0529	2216
29.1525	277		30.0672	2274		29.159	197		30.0672	2172
29.1655	273		30.0815	2261		29.172	215.1		30.0815	2238
29.1785	270		30.0958	2246		29.185	193.9		30.0958	2274
29.1915	266		30.1101	2274		29.198	224.8		30.1101	2185
29.2045	264		30.1244	2299		29.211	214.8		30.1244	2225
29.2175	261		30.1387	2338		29.224	190		30.1387	2222
29.2305	257		30.153	2250		29.237	175.2		30.153	2121
29.2435	254		30.1673	2293		29.25	195.5		30.1673	2197
29.2565	250		30.1816	2293		29.263	191.2		30.1816	2197
29.2695	247		30.1959	2186		29.276	195.8		30.1959	2099
29.2825	244		30.2102	2314		29.289	170.4		30.2102	2182
29.2955	242		30.2245	2220		29.302	171.8		30.2245	2161
29.3085	241		30.2388	2207		29.315	186.9		30.2388	2238
29.3215	240		30.2531	2244		29.328	182.5		30.2531	2144
29.3345	242		30.2674	2164		29.341	166.5		30.2674	2164
29.3475	244		30.2817	2211		29.354	178.5		30.2817	2200
29.3605	246		30.296	2237		29.367	177.3		30.296	2123
29.3735	248		30.3103	2182		29.38	177.9		30.3103	2144
29.3865	248		30.3246	2250		29.393	173.7		30.3246	2113
29.3995	247		30.3389	2228		29.406	165.3		30.3389	2129
29.4125	244		30.3532	2253		29.419	169.1		30.3532	2083
29.4255	240		30.3675	2234		29.432	170		30.3675	2106
29.4385	235		30.3818	2095		29.445	201.5		30.3818	2083
29.4515	230		30.3961	2161		29.458	165.4		30.3961	2199
29.4645	226		30.4104	2238		29.471	174.6		30.4104	2196
29.4775	224		30.4247	2155		29.484	174.2		30.4247	2158
29.4905	223		30.439	2169		29.497	145.4		30.439	2305
29.5035	223		30.4533	2198		29.51	157.5		30.4533	2120
29.5165	222		30.4676	2150		29.523	156.8		30.4676	2099
29.5295	220		30.4819	2224		29.536	145.9		30.4819	2174
29.5425	218		30.4962	2163		29.549	164.8		30.4962	2178
29.5555	215		30.5105	2128		29.562	157.9		30.5105	2100
29.5685	213		30.5248	2252		29.575	178.6		30.5248	2062
29.5815	211		30.5391	2161		29.588	178.6		30.5391	2193
29.5945	211		30.5534	2256		29.601	165.8		30.5534	2096
29.6075	213		30.5677	2259		29.614	167.6		30.5677	2116
29.6205	216		30.582	2210		29.627	147.2		30.582	2069
29.6335	218		30.5963	2105		29.64	157.4		30.5963	2114
29.6465	219		30.6106	2205		29.653	148.9		30.6106	2119
29.6595	219		30.6249	2141		29.666	145.9		30.6249	2104
29.6725	217		30.6392	2160		29.679	150.3		30.6392	2111
29.6855	216		30.6535	2157		29.692	150.4		30.6535	2116
29.6985	215		30.6678	2210		29.705	156.3		30.6678	2085
29.7115	216		30.6821	2283		29.718	176.8		30.6821	2097
29.7245	219		30.6964	2283		29.731	172.3		30.6964	2097
29.7375	223		30.7107	2258		29.744	159.4		30.7107	2084
29.7505	227		30.725	2141		29.757	162.9		30.725	2093
29.7635	231		30.7393	2141		29.77	160.6		30.7393	2027
29.7765	233		30.7536	2123		29.783	163.4		30.7536	2131
29.7895	234		30.7679	2020		29.796	156.6		30.7679	2062
29.8025	233		30.7822	2110		29.809	140.9		30.7822	2044
29.8155	230		30.7965	2132		29.822	145.2		30.7965	2003
29.8285	227		30.8108	2221		29.835	139.2		30.8108	2059
29.8415	225		30.8251	2102		29.848	144.2		30.8251	2095
29.8545	223		30.8394	2133		29.861	146.2		30.8394	2074
29.8675	221		30.8537	2113		29.874	140		30.8537	2051
29.8805	219		30.868	2080		29.887	145		30.868	2047
29.8935	217		30.8823	2123		29.9	147.3		30.8823	2135
29.9065	215		30.8966	2173		29.913	141.6		30.8966	2051
29.9195	212		30.9109	2178		29.926	147.6		30.9109	2109
29.9325	210		30.9252	2064		29.939	161.7		30.9252	2066
29.9455	207		30.9395	2068		29.952	153.1		30.9395	2143
29.9585	206		30.9538	2082		29.965	147.2		30.9538	2062
29.9715	205		30.9681	2042		29.978	150.7		30.9681	2140
29.9845	204		30.9824	2107		29.991	150.8		30.9824	2072
29.9975	204		30.9967	2061		30.004	148.9		30.9967	1987
30.0105	204		31.011	2043		30.017	164.6		31.011	2090
30.0235	204		31.0253	2169		30.03	151.5		31.0253	2091
30.0365	203		31.0396	2088		30.043	153.6		31.0396	2030
30.0495	202		31.0539	2153		30.056	141.7		31.0539	2030
30.0625	201		31.0682	2081		30.069	126.9		31.0682	2070
30.0755	200		31.0825	2163		30.082	135.3		31.0825	2081
30.0885	201		31.0968	2196		30.095	139		31.0968	2040
30.1015	205		31.1111	2213		30.108	151.3		31.1111	2085
30.1145	211		31.1254	2025		30.121	150.7		31.1254	2151
30.1275	218		31.1397	2033		30.134	143.3		31.1397	2089
30.1405	222		31.154	2078		30.147	163.3		31.154	2049
30.1535	221		31.1683	2160		30.16	180.1		31.1683	2030
30.1665	215		31.1826	2193		30.173	154.2		31.1826	2025
30.1795	205		31.1969	2193		30.186	133.5		31.1969	2025
30.1925	196		31.2112	2091		30.199	127.7		31.2112	1988
30.2055	188		31.2255	2063		30.212	154		31.2255	2046
30.2185	184		31.2398	2072		30.225	145.4		31.2398	2040
30.2315	183		31.2541	2077		30.238	135.4		31.2541	2028
30.2445	184		31.2684	1985		30.251	134.5		31.2684	1960
30.2575	187		31.2827	2067		30.264	155.3		31.2827	2010
30.2705	190		31.297	2133		30.277	162.3		31.297	1919
30.2835	194		31.3113	2131		30.29	125.9		31.3113	2034
30.2965	198		31.3256	2023		30.303	139.7		31.3256	2041
30.3095	201		31.3399	2063		30.316	127.8		31.3399	2041
30.3225	204		31.3542	2110		30.329	147.5		31.3542	2046
30.3355	207		31.3685	2065		30.342	150.1		31.3685	1975
30.3485	209		31.3828	2083		30.355	150.6		31.3828	1990
30.3615	211		31.3971	2106		30.368	146.1		31.3971	2046
30.3745	212		31.4114	2055		30.381	134.3		31.4114	2046
30.3875	212		31.4257	2043		30.394	144.4		31.4257	2028
30.4005	211		31.44	1987		30.407	146.1		31.44	2028
30.4135	209		31.4543	2080		30.42	130.1		31.4543	2109
30.4265	206		31.4686	2087		30.433	151.8		31.4686	2018
30.4395	203		31.4829	2093		30.446	136.5		31.4829	2059
30.4525	201		31.4972	2058		30.459	129.9		31.4972	2021
30.4655	199		31.5115	2058		30.472	129.8		31.5115	1959
30.4785	198		31.5258	2117		30.485	147		31.5258	2020
30.4915	197		31.5401	2101		30.498	145.6		31.5401	2044
30.5045	197		31.5544	2051		30.511	132.2		31.5544	1991
30.5175	196		31.5687	2013		30.524	144.9		31.5687	2031
30.5305	195		31.583	2033		30.537	132.1		31.583	1981
30.5435	195		31.5973	2124		30.55	148.8		31.5973	2072
30.5565	195		31.6116	2173		30.563	153.9		31.6116	2013
30.5695	195		31.6259	2115		30.576	125		31.6259	1970
30.5825	196		31.6402	2065		30.589	127.8		31.6402	2021
30.5955	198		31.6545	2094		30.602	148.8		31.6545	2063
30.6085	201		31.6688	2015		30.615	117.2		31.6688	2018
30.6215	204		31.6831	2106		30.628	153		31.6831	2068
30.6345	204		31.6974	2139		30.641	141.3		31.6974	2023
30.6475	203		31.7117	2139		30.654	144.5		31.7117	2023
30.6605	200		31.726	2013		30.667	145.9		31.726	2046
30.6735	196		31.7403	2023		30.68	130		31.7403	1963
30.6865	193		31.7546	2027		30.693	140.3		31.7546	2021
30.6995	192		31.7689	1982		30.706	158.5		31.7689	1960
30.7125	194		31.7832	2039		30.719	144.7		31.7832	1923
30.7255	198		31.7975	2032		30.732	135.2		31.7975	2025
30.7385	202		31.8118	2096		30.745	155.8		31.8118	1945
30.7515	205		31.8261	2072		30.758	134.4		31.8261	2023
30.7645	205		31.8404	2044		30.771	156.8		31.8404	2042
30.7775	203		31.8547	2042		30.784	145.2		31.8547	1877
30.7905	201		31.869	2106		30.797	142.6		31.869	2010
30.8035	197		31.8833	2001		30.81	138.3		31.8833	2004
30.8165	195		31.8976	2044		30.823	137.8		31.8976	2051
30.8295	192		31.9119	2093		30.836	157.2		31.9119	2062
30.8425	190		31.9262	2049		30.849	129.7		31.9262	2040
30.8555	187		31.9405	2094		30.862	131.7		31.9405	2019
30.8685	184		31.9548	2022		30.875	137.5		31.9548	1996
30.8815	182		31.9691	1986		30.888	131.4		31.9691	1959
30.8945	179		31.9834	2031		30.901	138.3		31.9834	2039
30.9075	178		31.9977	1992		30.914	137		31.9977	2039
30.9205	178		32.012	2055		30.927	138.5		32.012	2019
30.9335	178		32.0263	2130		30.94	133.1		32.0263	2050
30.9465	181		32.0406	2097		30.953	141.5		32.0406	2070
30.9595	186		32.0549	2170		30.966	131.6		32.0549	2063
30.9725	193		32.0692	2030		30.979	129.9		32.0692	2084
30.9855	198		32.0835	2074		30.992	132.4		32.0835	2061
30.9985	201		32.0978	2162		31.005	142.9		32.0978	2041
31.0115	201		32.1121	2032		31.018	146.5		32.1121	2000
31.0245	198		32.1264	2011		31.031	140		32.1264	2062
31.0375	195		32.1407	2110		31.044	137.6		32.1407	2129
31.0505	193		32.155	2148		31.057	142.2		32.155	2124
31.0635	193		32.1693	2044		31.07	130.9		32.1693	2087
31.0765	195		32.1836	2079		31.083	118.7		32.1836	1985
31.0895	197		32.1979	2143		31.096	130.1		32.1979	2058
31.1025	199		32.2122	2155		31.109	136.1		32.2122	2075
31.1155	200		32.2265	2155		31.122	142.3		32.2265	2075
31.1285	200		32.2408	2143		31.135	141.4		32.2408	2029
31.1415	198		32.2551	2179		31.148	137.7		32.2551	2075
31.1545	194		32.2694	2090		31.161	142.6		32.2694	2034
31.1675	190		32.2837	2034		31.174	141.5		32.2837	2066
31.1805	186		32.298	2057		31.187	132.5		32.298	1993
31.1935	184		32.3123	2138		31.2	129.9		32.3123	2107
31.2065	184		32.3266	2164		31.213	135.4		32.3266	2083
31.2195	186		32.3409	2271		31.226	124.8		32.3409	2071
31.2325	189		32.3552	2134		31.239	120.7		32.3552	2092
31.2455	189		32.3695	2155		31.252	126.6		32.3695	2128
31.2585	188		32.3838	2136		31.265	134.5		32.3838	2168
31.2715	184		32.3981	2211		31.278	139.7		32.3981	2076
31.2845	180		32.4124	2171		31.291	123.7		32.4124	2127
31.2975	177		32.4267	2246		31.304	125.6		32.4267	2171
31.3105	175		32.441	2234		31.317	128.6		32.441	2148
31.3235	176		32.4553	2280		31.33	135.6		32.4553	2115
31.3365	178		32.4696	2320		31.343	131.1		32.4696	2182
31.3495	181		32.4839	2352		31.356	128.5		32.4839	2239
31.3625	185		32.4982	2321		31.369	141.6		32.4982	2161
31.3755	188		32.5125	2356		31.382	135.1		32.5125	2269
31.3885	190		32.5268	2405		31.395	132.8		32.5268	2267
31.4015	192		32.5411	2368		31.408	141.3		32.5411	2243
31.4145	194		32.5554	2491		31.421	134.9		32.5554	2293
31.4275	195		32.5697	2455		31.434	124		32.5697	2316
31.4405	194		32.584	2487		31.447	123.1		32.584	2385
31.4535	192		32.5983	2643		31.46	126.8		32.5983	2529
31.4665	189		32.6126	2698		31.473	137.1		32.6126	2463
31.4795	185		32.6269	2687		31.486	128.1		32.6269	2623
31.4925	182		32.6412	2838		31.499	132.6		32.6412	2667
31.5055	179		32.6555	2894		31.512	138.3		32.6555	2693
31.5185	177		32.6698	2946		31.525	141		32.6698	2684
31.5315	177		32.6841	3017		31.538	136.1		32.6841	2738
31.5445	177		32.6984	3167		31.551	128.9		32.6984	2830
31.5575	179		32.7127	3273		31.564	122.2		32.7127	2941
31.5705	180		32.727	3273		31.577	116.9		32.727	2941
31.5835	182		32.7413	3426		31.59	132.7		32.7413	3117
31.5965	184		32.7556	3662		31.603	125.6		32.7556	3171
31.6095	186		32.7699	3814		31.616	154.7		32.7699	3497
31.6225	188		32.7842	3888		31.629	148.9		32.7842	3646
31.6355	190		32.7985	4106		31.642	127.8		32.7985	3698
31.6485	191		32.8128	4260		31.655	126.6		32.8128	3945
31.6615	193		32.8271	4448		31.668	121.7		32.8271	4121
31.6745	193		32.8414	4611		31.681	107.5		32.8414	4463
31.6875	192		32.8557	4806		31.694	114.1		32.8557	4433
31.7005	188		32.87	4961		31.707	136.9		32.87	4799
31.7135	184		32.8843	5160		31.72	127.9		32.8843	5050
31.7265	180		32.8986	5239		31.733	136.6		32.8986	5225
31.7395	179		32.9129	5548		31.746	132.8		32.9129	5286
31.7525	179		32.9272	5748		31.759	142		32.9272	5698
31.7655	181		32.9415	5692		31.772	129		32.9415	5733
31.7785	183		32.9558	5900		31.785	146.6		32.9558	5818
31.7915	185		32.9701	5943		31.798	137		32.9701	6056
31.8045	187		32.9844	5851		31.811	135.7		32.9844	6151
31.8175	187		32.9987	5933		31.824	123.1		32.9987	6226
31.8305	186		33.013	5845		31.837	128.1		33.013	6259
31.8435	183		33.0273	5850		31.85	142.9		33.0273	6425
31.8565	180		33.0416	5691		31.863	119.4		33.0416	6178
31.8695	177		33.0559	5576		31.876	122.9		33.0559	6223
31.8825	176		33.0702	5367		31.889	140.4		33.0702	5978
31.8955	178		33.0845	5269		31.902	130.5		33.0845	5866
31.9085	183		33.0988	5059		31.915	134.7		33.0988	5788
31.9215	189		33.1131	4904		31.928	134.1		33.1131	5449
31.9345	194		33.1274	4653		31.941	125.7		33.1274	5326
31.9475	197		33.1417	4406		31.954	136.9		33.1417	5115
31.9605	196		33.156	4297		31.967	140.7		33.156	4843
31.9735	194		33.1703	3929		31.98	153.5		33.1703	4730
31.9865	190		33.1846	3858		31.993	137.3		33.1846	4303
31.9995	187		33.1989	3610		32.006	130.6		33.1989	4240
32.0125	184		33.2132	3361		32.019	137.8		33.2132	4108
32.0255	184		33.2275	3339		32.032	146.7		33.2275	3787
32.0385	185		33.2418	3339		32.045	136.2		33.2418	3787
32.0515	186		33.2561	3138		32.058	115.6		33.2561	3489
32.0645	188		33.2704	2969		32.071	138.4		33.2704	3202
32.0775	189		33.2847	2855		32.084	138.3		33.2847	3158
32.0905	188		33.299	2664		32.097	124.9		33.299	3091
32.1035	185		33.3133	2599		32.11	124.4		33.3133	2835
32.1165	181		33.3276	2554		32.123	139.9		33.3276	2692
32.1295	177		33.3419	2515		32.136	140.9		33.3419	2677
32.1425	175		33.3562	2471		32.149	134.6		33.3562	2681
32.1555	176		33.3705	2378		32.162	141.3		33.3705	2510
32.1685	180		33.3848	2315		32.175	141		33.3848	2437
32.1815	185		33.3991	2350		32.188	126		33.3991	2416
32.1945	190		33.4134	2332		32.201	140.6		33.4134	2247
32.2075	193		33.4277	2261		32.214	145.9		33.4277	2367
32.2205	195		33.442	2258		32.227	133.7		33.442	2271
32.2335	195		33.4563	2266		32.24	118.6		33.4563	2215
32.2465	193		33.4706	2167		32.253	118.8		33.4706	2183
32.2595	191		33.4849	2172		32.266	131.8		33.4849	2230
32.2725	188		33.4992	2184		32.279	141.7		33.4992	2242
32.2855	186		33.5135	2118		32.292	144		33.5135	2097
32.2985	185		33.5278	2154		32.305	134.3		33.5278	2194
32.3115	187		33.5421	2067		32.318	137.9		33.5421	2200
32.3245	188		33.5564	2129		32.331	144.3		33.5564	2074
32.3375	190		33.5707	1946		32.344	142.5		33.5707	2082
32.3505	191		33.585	2061		32.357	139.2		33.585	2027
32.3635	191		33.5993	2120		32.37	138.6		33.5993	1901
32.3765	191		33.6136	2069		32.383	146		33.6136	1995
32.3895	191		33.6279	2005		32.396	153.3		33.6279	1946
32.4025	192		33.6422	2031		32.409	148.2		33.6422	2072
32.4155	196		33.6565	1993		32.422	145.2		33.6565	1908
32.4285	200		33.6708	1915		32.435	146.5		33.6708	1989
32.4415	204		33.6851	2048		32.448	149.2		33.6851	2039
32.4545	205		33.6994	2009		32.461	144.6		33.6994	1953
32.4675	202		33.7137	1926		32.474	142.7		33.7137	2026
32.4805	198		33.728	2017		32.487	156.1		33.728	1950
32.4935	195		33.7423	2024		32.5	163		33.7423	1932
32.5065	194		33.7566	2024		32.513	157.1		33.7566	1932
32.5195	195		33.7709	2023		32.526	146.3		33.7709	1914
32.5325	198		33.7852	1927		32.539	144.6		33.7852	1941
32.5455	201		33.7995	1905		32.552	151.5		33.7995	1994
32.5585	205		33.8138	1916		32.565	158.7		33.8138	1944
32.5715	210		33.8281	1796		32.578	163.1		33.8281	1853
32.5845	214		33.8424	1846		32.591	174.3		33.8424	1918
32.5975	218		33.8567	1943		32.604	183		33.8567	1875
32.6105	221		33.871	1879		32.617	173.2		33.871	1849
32.6235	221		33.8853	1934		32.63	185		33.8853	1784
32.6365	220		33.8996	1916		32.643	179.6		33.8996	1869
32.6495	218		33.9139	1929		32.656	174		33.9139	1797
32.6625	220		33.9282	1820		32.669	184.9		33.9282	1849
32.6755	226		33.9425	1940		32.682	182.4		33.9425	1833
32.6885	235		33.9568	1856		32.695	174.7		33.9568	1945
32.7015	245		33.9711	1819		32.708	210.5		33.9711	1762
32.7145	254		33.9854	1852		32.721	225.7		33.9854	1905
32.7275	260		33.9997	1858		32.734	228.1		33.9997	1884
32.7405	264		34.014	1932		32.747	247		34.014	1842
32.7535	267		34.0283	1847		32.76	256.9		34.0283	1864
32.7665	272		34.0426	1865		32.773	250.4		34.0426	1716
32.7795	280		34.0569	1891		32.786	283		34.0569	1842
32.7925	290		34.0712	1862		32.799	297.7		34.0712	1849
32.8055	303		34.0855	1851		32.812	327.4		34.0855	1873
32.8185	318		34.0998	1727		32.825	343.7		34.0998	1809
32.8315	334		34.1141	1821		32.838	375.8		34.1141	1818
32.8445	351		34.1284	1875		32.851	405.9		34.1284	1840
32.8575	370		34.1427	1857		32.864	392.3		34.1427	1860
32.8705	391		34.157	1860		32.877	437.4		34.157	1857
32.8835	414		34.1713	1799		32.89	472.4		34.1713	1748
32.8965	439		34.1856	1830		32.903	492.3		34.1856	1712
32.9095	468		34.1999	1868		32.916	529.3		34.1999	1763
32.9225	500		34.2142	1836		32.929	577.9		34.2142	1798
32.9355	538		34.2285	1847		32.942	598.9		34.2285	1844
32.9485	580		34.2428	1821		32.955	664.5		34.2428	1763
32.9615	627		34.2571	1837		32.968	681.8		34.2571	1754
32.9745	675		34.2714	1837		32.981	668.4		34.2714	1754
32.9875	721		34.2857	1791		32.994	678.4		34.2857	1767
33.0005	762		34.3	1826		33.007	735.4		34.3	1784
33.0135	796		34.3143	1842		33.02	758.2		34.3143	1756
33.0265	824		34.3286	1779		33.033	716.9		34.3286	1667
33.0395	846		34.3429	1801		33.046	736.6		34.3429	1754
33.0525	861		34.3572	1810		33.059	740.9		34.3572	1749
33.0655	871		34.3715	1831		33.072	699.4		34.3715	1702
33.0785	874		34.3858	1864		33.085	690.5		34.3858	1724
33.0915	872		34.4001	1828		33.098	679		34.4001	1746
33.1045	866		34.4144	1803		33.111	630.1		34.4144	1770
33.1175	856		34.4287	1831		33.124	568.7		34.4287	1729
33.1305	840		34.443	1734		33.137	509.7		34.443	1799
33.1435	816		34.4573	1765		33.15	483		34.4573	1748
33.1565	785		34.4716	1747		33.163	458.2		34.4716	1784
33.1695	748		34.4859	1782		33.176	432.5		34.4859	1761
33.1825	708		34.5002	1648		33.189	437.8		34.5002	1750
33.1955	669		34.5145	1831		33.202	393.7		34.5145	1735
33.2085	632		34.5288	1837		33.215	365.3		34.5288	1738
33.2215	596		34.5431	1748		33.228	318.8		34.5431	1686
33.2345	558		34.5574	1896		33.241	325.3		34.5574	1749
33.2475	516		34.5717	1869		33.254	310.3		34.5717	1809
33.2605	472		34.586	1797		33.267	279.8		34.586	1742
33.2735	431		34.6003	1752		33.28	230.1		34.6003	1761
33.2865	396		34.6146	1793		33.293	229.5		34.6146	1814
33.2995	370		34.6289	1737		33.306	217.6		34.6289	1759
33.3125	350		34.6432	1874		33.319	211.6		34.6432	1725
33.3255	334		34.6575	1767		33.332	215.3		34.6575	1636
33.3385	320		34.6718	1739		33.345	181.9		34.6718	1712
33.3515	308		34.6861	1783		33.358	195.4		34.6861	1672
33.3645	295		34.7004	1816		33.371	189		34.7004	1642
33.3775	283		34.7147	1747		33.384	195.2		34.7147	1668
33.3905	270		34.729	1698		33.397	188.1		34.729	1719
33.4035	258		34.7433	1776		33.41	172.3		34.7433	1693
33.4165	247		34.7576	1732		33.423	165		34.7576	1675
33.4295	237		34.7719	1797		33.436	162.4		34.7719	1737
33.4425	229		34.7862	1738		33.449	155.8		34.7862	1681
33.4555	222		34.8005	1798		33.462	170		34.8005	1748
33.4685	218		34.8148	1824		33.475	143.3		34.8148	1715
33.4815	214		34.8291	1776		33.488	148.6		34.8291	1684
33.4945	213		34.8434	1676		33.501	148.9		34.8434	1671
33.5075	212		34.8577	1773		33.514	147		34.8577	1703
33.5205	212		34.872	1816		33.527	139.9		34.872	1712
33.5335	214		34.8863	1677		33.54	154.6		34.8863	1699
33.5465	216		34.9006	1726		33.553	144		34.9006	1650
33.5595	219		34.9149	1802		33.566	142.8		34.9149	1734
33.5725	221		34.9292	1828		33.579	146		34.9292	1739
33.5855	220		34.9435	1822		33.592	137.4		34.9435	1664
33.5985	216		34.9578	1759		33.605	137.6		34.9578	1671
33.6115	209		34.9721	1695		33.618	153.5		34.9721	1644
33.6245	201		34.9864	1776		33.631	143.9		34.9864	1707
33.6375	194		35.0007	1739		33.644	140.9		35.0007	1684
33.6505	188		35.015	1780		33.657	150.5		35.015	1653
33.6635	183		35.0293	1819		33.67	141.3		35.0293	1611
33.6765	178		35.0436	1644		33.683	131.2		35.0436	1663
33.6895	175		35.0579	1775		33.696	149.9		35.0579	1633
33.7025	173		35.0722	1691		33.709	144.4		35.0722	1619
33.7155	172		35.0865	1699		33.722	131.1		35.0865	1706
33.7285	173		35.1008	1771		33.735	134.8		35.1008	1676
33.7415	176		35.1151	1797		33.748	136.5		35.1151	1670
33.7545	181		35.1294	1737		33.761	134.9		35.1294	1662
33.7675	185		35.1437	1790		33.774	127.2		35.1437	1709
33.7805	189		35.158	1716		33.787	118.9		35.158	1728
33.7935	190		35.1723	1685		33.8	110.9		35.1723	1711
33.8065	189		35.1866	1722		33.813	110.9		35.1866	1685
33.8195	185		35.2009	1737		33.826	132.5		35.2009	1621
33.8325	180		35.2152	1721		33.839	141.4		35.2152	1715
33.8455	175		35.2295	1711		33.852	127.4		35.2295	1672
33.8585	172		35.2438	1708		33.865	124.2		35.2438	1656
33.8715	171		35.2581	1748		33.878	131.1		35.2581	1642
33.8845	170		35.2724	1796		33.891	131.5		35.2724	1681
33.8975	171		35.2867	1796		33.904	121		35.2867	1681
33.9105	172		35.301	1665		33.917	121.7		35.301	1591
33.9235	173		35.3153	1732		33.93	130.7		35.3153	1674
33.9365	175		35.3296	1737		33.943	121.2		35.3296	1590
33.9495	177		35.3439	1701		33.956	127.5		35.3439	1645
33.9625	179		35.3582	1707		33.969	137.3		35.3582	1689
33.9755	182		35.3725	1700		33.982	114		35.3725	1675
33.9885	184		35.3868	1758		33.995	104.5		35.3868	1655
34.0015	186		35.4011	1736		34.008	109.4		35.4011	1617
34.0145	186		35.4154	1803		34.021	126		35.4154	1621
34.0275	184		35.4297	1708		34.034	120.4		35.4297	1615
34.0405	180		35.444	1688		34.047	113.6		35.444	1603
34.0535	177		35.4583	1688		34.06	120.2		35.4583	1701
34.0665	174		35.4726	1686		34.073	132.3		35.4726	1659
34.0795	172		35.4869	1677		34.086	130.1		35.4869	1668
34.0925	171		35.5012	1669		34.099	114.7		35.5012	1625
34.1055	171		35.5155	1674		34.112	95.7		35.5155	1594
34.1185	171		35.5298	1730		34.125	107.1		35.5298	1667
34.1315	172		35.5441	1727		34.138	119		35.5441	1592
34.1445	172		35.5584	1730		34.151	119.5		35.5584	1551
34.1575	173		35.5727	1627		34.164	117.8		35.5727	1654
34.1705	173		35.587	1698		34.177	111.8		35.587	1665
34.1835	173		35.6013	1715		34.19	125.1		35.6013	1588
34.1965	173		35.6156	1634		34.203	106		35.6156	1582
34.2095	172		35.6299	1656		34.216	91.7		35.6299	1548
34.2225	172		35.6442	1625		34.229	100.8		35.6442	1696
34.2355	172		35.6585	1658		34.242	109.5		35.6585	1553
34.2485	172		35.6728	1686		34.255	113.3		35.6728	1571
34.2615	172		35.6871	1674		34.268	120.3		35.6871	1657
34.2745	172		35.7014	1669		34.281	118.8		35.7014	1643
34.2875	172		35.7157	1688		34.294	102		35.7157	1714
34.3005	172		35.73	1705		34.307	122.1		35.73	1642
34.3135	173		35.7443	1667		34.32	122.1		35.7443	1662
34.3265	173		35.7586	1758		34.333	118.4		35.7586	1516
34.3395	171		35.7729	1736		34.346	145.4		35.7729	1637
34.3525	168		35.7872	1606		34.359	109.5		35.7872	1590
34.3655	164		35.8015	1606		34.372	114.3		35.8015	1590
34.3785	159		35.8158	1639		34.385	105.4		35.8158	1617
34.3915	154		35.8301	1611		34.398	111.2		35.8301	1583
34.4045	150		35.8444	1716		34.411	114.5		35.8444	1635
34.4175	147		35.8587	1626		34.424	103		35.8587	1569
34.4305	146		35.873	1598		34.437	104.4		35.873	1531
34.4435	146		35.8873	1610		34.45	124.1		35.8873	1585
34.4565	148		35.9016	1629		34.463	132		35.9016	1618
34.4695	152		35.9159	1674		34.476	136.9		35.9159	1609
34.4825	158		35.9302	1679		34.489	110.5		35.9302	1553
34.4955	164		35.9445	1702		34.502	133.3		35.9445	1625
34.5085	169		35.9588	1679		34.515	91.8		35.9588	1697
34.5215	172		35.9731	1637		34.528	131.8		35.9731	1527
34.5345	171		35.9874	1662		34.541	114.3		35.9874	1642
34.5475	169		36.0017	1709		34.554	108.3		36.0017	1571
34.5605	166		36.016	1660		34.567	103.4		36.016	1584
34.5735	164		36.0303	1730		34.58	125.8		36.0303	1696
34.5865	164		36.0446	1657		34.593	109.1		36.0446	1571
34.5995	167		36.0589	1677		34.606	118.6		36.0589	1574
34.6125	169		36.0732	1699		34.619	101.5		36.0732	1558
34.6255	171		36.0875	1686		34.632	104.2		36.0875	1574
34.6385	169		36.1018	1643		34.645	103.3		36.1018	1599
34.6515	165		36.1161	1656		34.658	119.2		36.1161	1639
34.6645	160		36.1304	1646		34.671	108.5		36.1304	1589
34.6775	155		36.1447	1724		34.684	111.8		36.1447	1659
34.6905	152		36.159	1560		34.697	117.1		36.159	1662
34.7035	150		36.1733	1658		34.71	88.8		36.1733	1588
34.7165	151		36.1876	1647		34.723	100.4		36.1876	1571
34.7295	153		36.2019	1657		34.736	106.6		36.2019	1559
34.7425	156		36.2162	1728		34.749	114		36.2162	1637
34.7555	159		36.2305	1700		34.762	121.4		36.2305	1554
34.7685	161		36.2448	1733		34.775	125.3		36.2448	1602
34.7815	162		36.2591	1595		34.788	122.2		36.2591	1558
34.7945	161		36.2734	1650		34.801	112.1		36.2734	1580
34.8075	159		36.2877	1596		34.814	101.7		36.2877	1522
34.8205	157		36.302	1596		34.827	97.6		36.302	1522
34.8335	155		36.3163	1639		34.84	105.5		36.3163	1514
34.8465	154		36.3306	1581		34.853	105.5		36.3306	1593
34.8595	154		36.3449	1599		34.866	106.8		36.3449	1592
34.8725	154		36.3592	1647		34.879	97.1		36.3592	1524
34.8855	155		36.3735	1645		34.892	98.7		36.3735	1517
34.8985	156		36.3878	1637		34.905	106		36.3878	1500
34.9115	158		36.4021	1617		34.918	121		36.4021	1549
34.9245	160		36.4164	1691		34.931	119.6		36.4164	1597
34.9375	162		36.4307	1662		34.944	103		36.4307	1517
34.9505	165		36.445	1574		34.957	104.7		36.445	1603
34.9635	166		36.4593	1650		34.97	118.6		36.4593	1587
34.9765	167		36.4736	1669		34.983	113.8		36.4736	1535
34.9895	165		36.4879	1681		34.996	107		36.4879	1564
35.0025	162		36.5022	1598		35.009	101.8		36.5022	1668
35.0155	159		36.5165	1712		35.022	106.6		36.5165	1612
35.0285	156		36.5308	1661		35.035	105.1		36.5308	1542
35.0415	153		36.5451	1628		35.048	102.9		36.5451	1615
35.0545	150		36.5594	1643		35.061	96.8		36.5594	1604
35.0675	149		36.5737	1596		35.074	96.5		36.5737	1597
35.0805	147		36.588	1671		35.087	108.2		36.588	1565
35.0935	146		36.6023	1665		35.1	106.8		36.6023	1601
35.1065	146		36.6166	1549		35.113	100		36.6166	1483
35.1195	146		36.6309	1625		35.126	103.9		36.6309	1547
35.1325	147		36.6452	1590		35.139	107.5		36.6452	1488
35.1455	149		36.6595	1612		35.152	93.7		36.6595	1469
35.1585	153		36.6738	1601		35.165	96.2		36.6738	1486
35.1715	157		36.6881	1574		35.178	122.3		36.6881	1565
35.1845	159		36.7024	1552		35.191	124.8		36.7024	1554
35.1975	159		36.7167	1551		35.204	102.7		36.7167	1546
35.2105	155		36.731	1659		35.217	93.8		36.731	1516
35.2235	151		36.7453	1676		35.23	102.9		36.7453	1556
35.2365	147		36.7596	1605		35.243	95.8		36.7596	1574
35.2495	147		36.7739	1615		35.256	94.8		36.7739	1500
35.2625	150		36.7882	1671		35.269	95.2		36.7882	1512
35.2755	155		36.8025	1576		35.282	95.1		36.8025	1523
35.2885	158		36.8168	1576		35.295	102.5		36.8168	1523
35.3015	159		36.8311	1619		35.308	111.6		36.8311	1481
35.3145	156		36.8454	1584		35.321	112.7		36.8454	1519
35.3275	151		36.8597	1584		35.334	113		36.8597	1514
35.3405	147		36.874	1583		35.347	107.6		36.874	1492
35.3535	145		36.8883	1659		35.36	107.7		36.8883	1577
35.3665	145		36.9026	1547		35.373	104.4		36.9026	1512
35.3795	148		36.9169	1572		35.386	104.5		36.9169	1516
35.3925	151		36.9312	1631		35.399	104		36.9312	1544
35.4055	154		36.9455	1626		35.412	95.7		36.9455	1466
35.4185	155		36.9598	1578		35.425	99.2		36.9598	1593
35.4315	154		36.9741	1632		35.438	99.8		36.9741	1540
35.4445	153		36.9884	1601		35.451	109		36.9884	1531
35.4575	151		37.0027	1608		35.464	111.8		37.0027	1574
35.4705	151		37.017	1554		35.477	106.5		37.017	1534
35.4835	153		37.0313	1521		35.49	97.7		37.0313	1595
35.4965	156		37.0456	1634		35.503	120.6		37.0456	1527
35.5095	158		37.0599	1585		35.516	112.5		37.0599	1565
35.5225	158		37.0742	1557		35.529	106.8		37.0742	1486
35.5355	156		37.0885	1601		35.542	125		37.0885	1569
35.5485	152		37.1028	1564		35.555	113.7		37.1028	1608
35.5615	150		37.1171	1577		35.568	122.6		37.1171	1534
35.5745	149		37.1314	1563		35.581	99.4		37.1314	1517
35.5875	151		37.1457	1611		35.594	100.1		37.1457	1504
35.6005	154		37.16	1593		35.607	90.7		37.16	1597
35.6135	159		37.1743	1620		35.62	106.7		37.1743	1513
35.6265	163		37.1886	1625		35.633	89.6		37.1886	1501
35.6395	165		37.2029	1666		35.646	95.1		37.2029	1521
35.6525	165		37.2172	1597		35.659	96.1		37.2172	1530
35.6655	162		37.2315	1651		35.672	96.5		37.2315	1476
35.6785	157		37.2458	1592		35.685	92.2		37.2458	1525
35.6915	151		37.2601	1607		35.698	108.9		37.2601	1542
35.7045	146		37.2744	1634		35.711	107.1		37.2744	1535
35.7175	141		37.2887	1529		35.724	89.4		37.2887	1537
35.7305	139		37.303	1566		35.737	98.9		37.303	1545
35.7435	138		37.3173	1568		35.75	94.1		37.3173	1482
35.7565	140		37.3316	1568		35.763	100.1		37.3316	1482
35.7695	144		37.3459	1630		35.776	118		37.3459	1449
35.7825	149		37.3602	1570		35.789	102.2		37.3602	1522
35.7955	155		37.3745	1553		35.802	105.9		37.3745	1511
35.8085	160		37.3888	1522		35.815	107		37.3888	1483
35.8215	163		37.4031	1583		35.828	91.7		37.4031	1506
35.8345	163		37.4174	1597		35.841	103.3		37.4174	1561
35.8475	161		37.4317	1586		35.854	112.4		37.4317	1596
35.8605	157		37.446	1588		35.867	97.2		37.446	1585
35.8735	154		37.4603	1530		35.88	78.6		37.4603	1495
35.8865	151		37.4746	1578		35.893	101.5		37.4746	1493
35.8995	148		37.4889	1560		35.906	111.2		37.4889	1499
35.9125	147		37.5032	1621		35.919	98.7		37.5032	1535
35.9255	145		37.5175	1620		35.932	95.2		37.5175	1536
35.9385	145		37.5318	1526		35.945	122.8		37.5318	1498
35.9515	145		37.5461	1517		35.958	88.4		37.5461	1563
35.9645	145		37.5604	1579		35.971	97.3		37.5604	1570
35.9775	147		37.5747	1559		35.984	106.7		37.5747	1473
35.9905	150		37.589	1564		35.997	101.4		37.589	1511
36.0035	154		37.6033	1537		36.01	94.3		37.6033	1599
36.0165	159		37.6176	1511		36.023	92.2		37.6176	1543
36.0295	163		37.6319	1596		36.036	97.6		37.6319	1447
36.0425	164		37.6462	1520		36.049	88.7		37.6462	1444
36.0555	163		37.6605	1616		36.062	111.7		37.6605	1485
36.0685	159		37.6748	1585		36.075	104.4		37.6748	1480
36.0815	154		37.6891	1638		36.088	103		37.6891	1480
36.0945	149		37.7034	1516		36.101	98.8		37.7034	1458
36.1075	145		37.7177	1593		36.114	91.1		37.7177	1503
36.1205	143		37.732	1583		36.127	97		37.732	1475
36.1335	143		37.7463	1610		36.14	97.1		37.7463	1545
36.1465	144		37.7606	1629		36.153	106.6		37.7606	1490
36.1595	146		37.7749	1652		36.166	104		37.7749	1495
36.1725	148		37.7892	1644		36.179	103.8		37.7892	1481
36.1855	151		37.8035	1613		36.192	111.1		37.8035	1477
36.1985	154		37.8178	1522		36.205	106		37.8178	1417
36.2115	156		37.8321	1611		36.218	94.1		37.8321	1432
36.2245	156		37.8464	1611		36.231	97.8		37.8464	1432
36.2375	155		37.8607	1572		36.244	102.6		37.8607	1476
36.2505	151		37.875	1548		36.257	97.3		37.875	1440
36.2635	148		37.8893	1480		36.27	97.1		37.8893	1480
36.2765	145		37.9036	1548		36.283	97.8		37.9036	1483
36.2895	145		37.9179	1541		36.296	103.6		37.9179	1444
36.3025	147		37.9322	1494		36.309	109.2		37.9322	1478
36.3155	150		37.9465	1544		36.322	116.4		37.9465	1481
36.3285	153		37.9608	1597		36.335	129		37.9608	1544
36.3415	154		37.9751	1514		36.348	122.1		37.9751	1468
36.3545	153		37.9894	1570		36.361	117.5		37.9894	1507
36.3675	151		38.0037	1479		36.374	106.9		38.0037	1463
36.3805	149		38.018	1569		36.387	99.3		38.018	1489
36.3935	147		38.0323	1609		36.4	97.2		38.0323	1491
36.4065	146		38.0466	1592		36.413	102.8		38.0466	1478
36.4195	145		38.0609	1530		36.426	105.5		38.0609	1487
36.4325	144		38.0752	1576		36.439	96		38.0752	1412
36.4455	143		38.0895	1547		36.452	98.4		38.0895	1470
36.4585	141		38.1038	1536		36.465	96.8		38.1038	1468
36.4715	140		38.1181	1599		36.478	92.4		38.1181	1400
36.4845	139		38.1324	1570		36.491	104.4		38.1324	1458
36.4975	138		38.1467	1551		36.504	110.8		38.1467	1487
36.5105	138		38.161	1465		36.517	102.6		38.161	1497
36.5235	137		38.1753	1472		36.53	102		38.1753	1463
36.5365	137		38.1896	1576		36.543	99.9		38.1896	1478
36.5495	136		38.2039	1553		36.556	99.4		38.2039	1493
36.5625	136		38.2182	1518		36.569	105.4		38.2182	1431
36.5755	135		38.2325	1557		36.582	104.4		38.2325	1407
36.5885	135		38.2468	1563		36.595	94		38.2468	1478
36.6015	134		38.2611	1451		36.608	95.2		38.2611	1415
36.6145	134		38.2754	1588		36.621	105.6		38.2754	1437
36.6275	133		38.2897	1504		36.634	103.3		38.2897	1481
36.6405	132		38.304	1578		36.647	97.7		38.304	1491
36.6535	132		38.3183	1579		36.66	97.2		38.3183	1494
36.6665	132		38.3326	1554		36.673	105.4		38.3326	1485
36.6795	134		38.3469	1614		36.686	99.8		38.3469	1438
36.6925	136		38.3612	1506		36.699	91.2		38.3612	1446
36.7055	140		38.3755	1581		36.712	91.5		38.3755	1465
36.7185	144		38.3898	1514		36.725	90.5		38.3898	1409
36.7315	147		38.4041	1583		36.738	99.5		38.4041	1465
36.7445	147		38.4184	1526		36.751	89.1		38.4184	1419
36.7575	144		38.4327	1543		36.764	105.5		38.4327	1434
36.7705	141		38.447	1563		36.777	112.3		38.447	1463
36.7835	138		38.4613	1560		36.79	119.1		38.4613	1428
36.7965	137		38.4756	1614		36.803	110.4		38.4756	1468
36.8095	139		38.4899	1491		36.816	93.5		38.4899	1439
36.8225	142		38.5042	1493		36.829	104.9		38.5042	1387
36.8355	146		38.5185	1409		36.842	95.4		38.5185	1452
36.8485	150		38.5328	1508		36.855	93.9		38.5328	1492
36.8615	152		38.5471	1482		36.868	95.5		38.5471	1443
36.8745	152		38.5614	1574		36.881	84.1		38.5614	1477
36.8875	151		38.5757	1535		36.894	90.1		38.5757	1355
36.9005	150		38.59	1511		36.907	90.2		38.59	1497
36.9135	150		38.6043	1467		36.92	86.2		38.6043	1405
36.9265	149		38.6186	1564		36.933	96.7		38.6186	1460
36.9395	149		38.6329	1557		36.946	109.2		38.6329	1496
36.9525	150		38.6472	1555		36.959	103.8		38.6472	1501
36.9655	151		38.6615	1485		36.972	119.4		38.6615	1376
36.9785	151		38.6758	1558		36.985	101.1		38.6758	1409
36.9915	152		38.6901	1557		36.998	90.8		38.6901	1411
37.0045	151		38.7044	1549		37.011	101.6		38.7044	1396
37.0175	150		38.7187	1504		37.024	94.9		38.7187	1398
37.0305	147		38.733	1567		37.037	92.5		38.733	1371
37.0435	144		38.7473	1508		37.05	105.5		38.7473	1360
37.0565	142		38.7616	1523		37.063	84.3		38.7616	1453
37.0695	140		38.7759	1453		37.076	105.9		38.7759	1427
37.0825	140		38.7902	1474		37.089	90.1		38.7902	1405
37.0955	139		38.8045	1573		37.102	90		38.8045	1358
37.1085	140		38.8188	1537		37.115	103.7		38.8188	1388
37.1215	141		38.8331	1509		37.128	105		38.8331	1427
37.1345	142		38.8474	1525		37.141	116.5		38.8474	1458
37.1475	144		38.8617	1525		37.154	124.6		38.8617	1458
37.1605	146		38.876	1490		37.167	94.1		38.876	1467
37.1735	149		38.8903	1390		37.18	104		38.8903	1376
37.1865	150		38.9046	1520		37.193	97.7		38.9046	1499
37.1995	150		38.9189	1446		37.206	112.4		38.9189	1386
37.2125	148		38.9332	1497		37.219	104.1		38.9332	1328
37.2255	145		38.9475	1546		37.232	79.1		38.9475	1493
37.2385	141		38.9618	1566		37.245	83		38.9618	1451
37.2515	140		38.9761	1482		37.258	102.2		38.9761	1466
37.2645	140		38.9904	1471		37.271	101.6		38.9904	1411
37.2775	143		39.0047	1490		37.284	111.2		39.0047	1416
37.2905	147		39.019	1476		37.297	92.1		39.019	1452
37.3035	150		39.0333	1509		37.31	96.3		39.0333	1400
37.3165	150		39.0476	1573		37.323	90.7		39.0476	1446
37.3295	148		39.0619	1423		37.336	89		39.0619	1379
37.3425	144		39.0762	1545		37.349	81		39.0762	1437
37.3555	141		39.0905	1614		37.362	96.3		39.0905	1466
37.3685	139		39.1048	1497		37.375	95.6		39.1048	1442
37.3815	140		39.1191	1568		37.388	89.4		39.1191	1352
37.3945	142		39.1334	1576		37.401	93.3		39.1334	1443
37.4075	144		39.1477	1533		37.414	89.8		39.1477	1433
37.4205	144		39.162	1475		37.427	96.8		39.162	1386
37.4335	143		39.1763	1473		37.44	87.6		39.1763	1405
37.4465	139		39.1906	1512		37.453	84.4		39.1906	1377
37.4595	136		39.2049	1500		37.466	78.6		39.2049	1397
37.4725	135		39.2192	1507		37.479	95.5		39.2192	1385
37.4855	136		39.2335	1412		37.492	99.9		39.2335	1435
37.4985	138		39.2478	1472		37.505	96		39.2478	1439
37.5115	140		39.2621	1500		37.518	101		39.2621	1438
37.5245	142		39.2764	1457		37.531	92.2		39.2764	1469
37.5375	142		39.2907	1491		37.544	97.7		39.2907	1391
37.5505	140		39.305	1521		37.557	89.3		39.305	1486
37.5635	138		39.3193	1487		37.57	95.4		39.3193	1485
37.5765	136		39.3336	1493		37.583	97.8		39.3336	1448
37.5895	135		39.3479	1473		37.596	101.9		39.3479	1477
37.6025	137		39.3622	1515		37.609	97.4		39.3622	1443
37.6155	140		39.3765	1515		37.622	87.5		39.3765	1443
37.6285	144		39.3908	1514		37.635	98.9		39.3908	1338
37.6415	146		39.4051	1492		37.648	99.3		39.4051	1420
37.6545	145		39.4194	1418		37.661	94.2		39.4194	1427
37.6675	142		39.4337	1502		37.674	95.5		39.4337	1484
37.6805	137		39.448	1426		37.687	85.8		39.448	1436
37.6935	133		39.4623	1522		37.7	88.6		39.4623	1430
37.7065	132		39.4766	1496		37.713	105.3		39.4766	1496
37.7195	134		39.4909	1544		37.726	101.8		39.4909	1329
37.7325	137		39.5052	1509		37.739	90		39.5052	1443
37.7455	140		39.5195	1453		37.752	95.8		39.5195	1370
37.7585	141		39.5338	1459		37.765	91.5		39.5338	1411
37.7715	141		39.5481	1439		37.778	87.4		39.5481	1457
37.7845	140		39.5624	1437		37.791	89.3		39.5624	1348
37.7975	139		39.5767	1506		37.804	80.8		39.5767	1392
37.8105	140		39.591	1489		37.817	82.1		39.591	1389
37.8235	141		39.6053	1513		37.83	87		39.6053	1414
37.8365	143		39.6196	1527		37.843	95.4		39.6196	1353
37.8495	144		39.6339	1499		37.856	87.4		39.6339	1425
37.8625	145		39.6482	1433		37.869	81.8		39.6482	1374
37.8755	144		39.6625	1514		37.882	91.6		39.6625	1467
37.8885	144		39.6768	1456		37.895	99		39.6768	1385
37.9015	143		39.6911	1434		37.908	105		39.6911	1401
37.9145	142		39.7054	1522		37.921	90.5		39.7054	1378
37.9275	142		39.7197	1475		37.934	85.3		39.7197	1412
37.9405	145		39.734	1508		37.947	87.4		39.734	1425
37.9535	149		39.7483	1486		37.96	93.3		39.7483	1364
37.9665	152		39.7626	1465		37.973	92		39.7626	1293
37.9795	153		39.7769	1536		37.986	89.2		39.7769	1393
37.9925	152		39.7912	1541		37.999	87.2		39.7912	1366
38.0055	148		39.8055	1538		38.012	96.4		39.8055	1386
38.0185	142		39.8198	1505		38.025	94.7		39.8198	1409
38.0315	137		39.8341	1392		38.038	95.6		39.8341	1404
38.0445	133		39.8484	1451		38.051	101.3		39.8484	1432
38.0575	131		39.8627	1532		38.064	101.7		39.8627	1395
38.0705	131		39.877	1532		38.077	91		39.877	1395
38.0835	133		39.8913	1431		38.09	88		39.8913	1375
38.0965	134		39.9056	1464		38.103	93.5		39.9056	1352
38.1095	135		39.9199	1492		38.116	111.9		39.9199	1381
38.1225	135		39.9342	1399		38.129	110		39.9342	1370
38.1355	133		39.9485	1433		38.142	113.4		39.9485	1331
38.1485	130		39.9628	1480		38.155	95.3		39.9628	1298
38.1615	127		39.9771	1468		38.168	101		39.9771	1338
38.1745	124		39.9914	1492		38.181	101		39.9914	1436
38.1875	123		40.0057	1519		38.194	99.2		40.0057	1408
38.2005	124		40.02	1492		38.207	89.9		40.02	1406
38.2135	126		40.0343	1405		38.22	95.5		40.0343	1329
38.2265	129		40.0486	1391		38.233	99.5		40.0486	1438
38.2395	133		40.0629	1419		38.246	100.8		40.0629	1394
38.2525	137		40.0772	1483		38.259	84.4		40.0772	1400
38.2655	138		40.0915	1502		38.272	97.7		40.0915	1343
38.2785	136		40.1058	1443		38.285	105.1		40.1058	1379
38.2915	133		40.1201	1485		38.298	106.1		40.1201	1356
38.3045	129		40.1344	1492		38.311	106.3		40.1344	1383
38.3175	126		40.1487	1394		38.324	95.5		40.1487	1310
38.3305	125		40.163	1462		38.337	87.6		40.163	1431
38.3435	127		40.1773	1497		38.35	101.6		40.1773	1444
38.3565	132		40.1916	1437		38.363	89.8		40.1916	1366
38.3695	137		40.2059	1509		38.376	80.3		40.2059	1331
38.3825	140		40.2202	1410		38.389	104		40.2202	1350
38.3955	142		40.2345	1456		38.402	104		40.2345	1378
38.4085	141		40.2488	1476		38.415	107.9		40.2488	1366
38.4215	139		40.2631	1410		38.428	90.5		40.2631	1368
38.4345	137		40.2774	1470		38.441	105.4		40.2774	1404
38.4475	135		40.2917	1452		38.454	99.3		40.2917	1351
38.4605	133		40.306	1444		38.467	89.6		40.306	1392
38.4735	132		40.3203	1459		38.48	92.7		40.3203	1407
38.4865	130		40.3346	1507		38.493	99.5		40.3346	1379
38.4995	129		40.3489	1479		38.506	105.5		40.3489	1391
38.5125	128		40.3632	1407		38.519	124.1		40.3632	1366
38.5255	128		40.3775	1450		38.532	101		40.3775	1387
38.5385	127		40.3918	1450		38.545	105.1		40.3918	1387
38.5515	127		40.4061	1513		38.558	96.4		40.4061	1372
38.5645	127		40.4204	1454		38.571	89.8		40.4204	1383
38.5775	128		40.4347	1435		38.584	101.8		40.4347	1388
38.5905	129		40.449	1472		38.597	81.2		40.449	1323
38.6035	130		40.4633	1428		38.61	89.5		40.4633	1383
38.6165	132		40.4776	1450		38.623	88.7		40.4776	1332
38.6295	133		40.4919	1437		38.636	93.7		40.4919	1351
38.6425	135		40.5062	1433		38.649	95.8		40.5062	1398
38.6555	136		40.5205	1416		38.662	98.4		40.5205	1272
38.6685	137		40.5348	1445		38.675	106.1		40.5348	1366
38.6815	138		40.5491	1392		38.688	101.8		40.5491	1349
38.6945	138		40.5634	1428		38.701	93.1		40.5634	1358
38.7075	139		40.5777	1497		38.714	105.3		40.5777	1387
38.7205	138		40.592	1436		38.727	99.6		40.592	1302
38.7335	138		40.6063	1476		38.74	90.9		40.6063	1365
38.7465	137		40.6206	1485		38.753	88.3		40.6206	1426
38.7595	136		40.6349	1445		38.766	88.7		40.6349	1400
38.7725	135		40.6492	1435		38.779	100.3		40.6492	1405
38.7855	134		40.6635	1427		38.792	101.5		40.6635	1321
38.7985	133		40.6778	1425		38.805	98.6		40.6778	1376
38.8115	132		40.6921	1460		38.818	93.9		40.6921	1310
38.8245	130		40.7064	1428		38.831	82.7		40.7064	1399
38.8375	129		40.7207	1434		38.844	94.4		40.7207	1419
38.8505	129		40.735	1446		38.857	92		40.735	1428
38.8635	128		40.7493	1395		38.87	84.7		40.7493	1306
38.8765	128		40.7636	1447		38.883	91.5		40.7636	1392
38.8895	128		40.7779	1414		38.896	97.8		40.7779	1295
38.9025	128		40.7922	1406		38.909	94.2		40.7922	1359
38.9155	128		40.8065	1447		38.922	92.2		40.8065	1373
38.9285	128		40.8208	1456		38.935	93		40.8208	1376
38.9415	127		40.8351	1447		38.948	92.4		40.8351	1342
38.9545	127		40.8494	1482		38.961	105		40.8494	1368
38.9675	126		40.8637	1475		38.974	102.8		40.8637	1338
38.9805	126		40.878	1459		38.987	90.8		40.878	1357
38.9935	126		40.8923	1397		39	100.3		40.8923	1369
39.0065	127		40.9066	1397		39.013	101.6		40.9066	1369
39.0195	129		40.9209	1458		39.026	97.1		40.9209	1318
39.0325	132		40.9352	1494		39.039	94.9		40.9352	1380
39.0455	137		40.9495	1455		39.052	98		40.9495	1384
39.0585	143		40.9638	1391		39.065	100.6		40.9638	1331
39.0715	147		40.9781	1409		39.078	92.6		40.9781	1410
39.0845	148		40.9924	1466		39.091	88.6		40.9924	1377
39.0975	145		41.0067	1375		39.104	90.7		41.0067	1392
39.1105	139		41.021	1352		39.117	95.4		41.021	1298
39.1235	132		41.0353	1412		39.13	97.3		41.0353	1329
39.1365	128		41.0496	1400		39.143	95.6		41.0496	1368
39.1495	127		41.0639	1385		39.156	88.5		41.0639	1400
39.1625	130		41.0782	1380		39.169	83.4		41.0782	1303
39.1755	134		41.0925	1366		39.182	75.8		41.0925	1344
39.1885	137		41.1068	1382		39.195	79.2		41.1068	1396
39.2015	138		41.1211	1369		39.208	95.9		41.1211	1360
39.2145	138		41.1354	1526		39.221	87.4		41.1354	1361
39.2275	136		41.1497	1379		39.234	82.1		41.1497	1393
39.2405	135		41.164	1408		39.247	88.5		41.164	1344
39.2535	134		41.1783	1504		39.26	81.4		41.1783	1372
39.2665	133		41.1926	1516		39.273	91.2		41.1926	1361
39.2795	132		41.2069	1463		39.286	105		41.2069	1352
39.2925	131		41.2212	1431		39.299	98.1		41.2212	1350
39.3055	129		41.2355	1450		39.312	90.6		41.2355	1370
39.3185	128		41.2498	1466		39.325	96.1		41.2498	1400
39.3315	126		41.2641	1412		39.338	91		41.2641	1239
39.3445	125		41.2784	1430		39.351	93		41.2784	1300
39.3575	124		41.2927	1434		39.364	87.3		41.2927	1342
39.3705	124		41.307	1439		39.377	98.2		41.307	1351
39.3835	124		41.3213	1483		39.39	105		41.3213	1355
39.3965	125		41.3356	1445		39.403	88.5		41.3356	1368
39.4095	127		41.3499	1423		39.416	99.2		41.3499	1381
39.4225	129		41.3642	1423		39.429	106.2		41.3642	1360
39.4355	132		41.3785	1545		39.442	100.8		41.3785	1378
39.4485	134		41.3928	1393		39.455	91.2		41.3928	1341
39.4615	135		41.4071	1393		39.468	87.1		41.4071	1341
39.4745	135		41.4214	1432		39.481	84.4		41.4214	1270
39.4875	133		41.4357	1416		39.494	92		41.4357	1333
39.5005	130		41.45	1418		39.507	94.2		41.45	1294
39.5135	127		41.4643	1436		39.52	78.4		41.4643	1320
39.5265	124		41.4786	1467		39.533	80.1		41.4786	1336
39.5395	123		41.4929	1381		39.546	76		41.4929	1283
39.5525	125		41.5072	1482		39.559	91.5		41.5072	1366
39.5655	129		41.5215	1466		39.572	96.3		41.5215	1430
39.5785	133		41.5358	1325		39.585	98.5		41.5358	1370
39.5915	137		41.5501	1444		39.598	93		41.5501	1290
39.6045	140		41.5644	1448		39.611	93.6		41.5644	1292
39.6175	142		41.5787	1447		39.624	100.4		41.5787	1330
39.6305	142		41.593	1399		39.637	75.9		41.593	1288
39.6435	142		41.6073	1423		39.65	92.7		41.6073	1363
39.6565	142		41.6216	1391		39.663	86.2		41.6216	1363
39.6695	141		41.6359	1413		39.676	91.1		41.6359	1349
39.6825	140		41.6502	1469		39.689	96.9		41.6502	1350
39.6955	138		41.6645	1361		39.702	92		41.6645	1389
39.7085	134		41.6788	1417		39.715	88		41.6788	1361
39.7215	130		41.6931	1463		39.728	94.9		41.6931	1321
39.7345	126		41.7074	1375		39.741	75.6		41.7074	1396
39.7475	122		41.7217	1381		39.754	88.5		41.7217	1297
39.7605	121		41.736	1423		39.767	92.8		41.736	1423
39.7735	121		41.7503	1432		39.78	105.2		41.7503	1292
39.7865	122		41.7646	1410		39.793	101.3		41.7646	1354
39.7995	125		41.7789	1317		39.806	80.7		41.7789	1335
39.8125	128		41.7932	1416		39.819	90.8		41.7932	1353
39.8255	131		41.8075	1394		39.832	84.8		41.8075	1306
39.8385	133		41.8218	1408		39.845	102.7		41.8218	1364
39.8515	134		41.8361	1425		39.858	70.6		41.8361	1336
39.8645	133		41.8504	1419		39.871	81.7		41.8504	1270
39.8775	131		41.8647	1466		39.884	90		41.8647	1303
39.8905	129		41.879	1473		39.897	81.6		41.879	1348
39.9035	127		41.8933	1437		39.91	88.4		41.8933	1343
39.9165	125		41.9076	1392		39.923	98.3		41.9076	1292
39.9295	124		41.9219	1392		39.936	95.9		41.9219	1292
39.9425	124		41.9362	1414		39.949	86.1		41.9362	1281
39.9555	124		41.9505	1465		39.962	88.8		41.9505	1275
39.9685	124		41.9648	1368		39.975	96.3		41.9648	1262
39.9815	124		41.9791	1378		39.988	80		41.9791	1305
39.9945	125		41.9934	1402		40.001	85		41.9934	1339
40.0075	126		42.0077	1426		40.014	94.1		42.0077	1294
40.0205	126		42.022	1453		40.027	82.5		42.022	1370
40.0335	128		42.0363	1430		40.04	85.4		42.0363	1239
40.0465	129		42.0506	1361		40.053	90.9		42.0506	1349
40.0595	131		42.0649	1389		40.066	99.2		42.0649	1361
40.0725	134		42.0792	1424		40.079	102.7		42.0792	1356
40.0855	137		42.0935	1382		40.092	104.4		42.0935	1298
40.0985	138		42.1078	1412		40.105	96		42.1078	1285
40.1115	139		42.1221	1438		40.118	93.4		42.1221	1384
40.1245	138		42.1364	1414		40.131	98		42.1364	1356
40.1375	135		42.1507	1320		40.144	86.7		42.1507	1239
40.1505	131		42.165	1417		40.157	87.2		42.165	1336
40.1635	126		42.1793	1412		40.17	91		42.1793	1328
40.1765	123		42.1936	1367		40.183	91.6		42.1936	1332
40.1895	121		42.2079	1372		40.196	92.6		42.2079	1365
40.2025	122		42.2222	1430		40.209	93		42.2222	1324
40.2155	125		42.2365	1446		40.222	82.7		42.2365	1338
40.2285	129		42.2508	1394		40.235	82.5		42.2508	1275
40.2415	134		42.2651	1402		40.248	93.4		42.2651	1327
40.2545	136		42.2794	1384		40.261	108.9		42.2794	1381
40.2675	136		42.2937	1407		40.274	95		42.2937	1283
40.2805	132		42.308	1438		40.287	81.3		42.308	1267
40.2935	128		42.3223	1427		40.3	91.1		42.3223	1286
40.3065	124		42.3366	1418		40.313	88.4		42.3366	1285
40.3195	123		42.3509	1468		40.326	74.7		42.3509	1296
40.3325	125		42.3652	1453		40.339	71.6		42.3652	1277
40.3455	128		42.3795	1459		40.352	85.6		42.3795	1362
40.3585	132		42.3938	1496		40.365	99.5		42.3938	1352
40.3715	134		42.4081	1311		40.378	98.6		42.4081	1361
40.3845	134		42.4224	1444		40.391	94.1		42.4224	1362
40.3975	132		42.4367	1444		40.404	86.5		42.4367	1362
40.4105	131		42.451	1353		40.417	78.1		42.451	1317
40.4235	131		42.4653	1411		40.43	93.9		42.4653	1395
40.4365	133		42.4796	1494		40.443	100.2		42.4796	1360
40.4495	134		42.4939	1467		40.456	76.3		42.4939	1324
40.4625	134		42.5082	1411		40.469	79.1		42.5082	1348
40.4755	133		42.5225	1421		40.482	87.5		42.5225	1356
40.4885	130		42.5368	1383		40.495	87.7		42.5368	1340
40.5015	126		42.5511	1393		40.508	89.1		42.5511	1307
40.5145	124		42.5654	1391		40.521	81		42.5654	1283
40.5275	123		42.5797	1405		40.534	93.2		42.5797	1349
40.5405	123		42.594	1426		40.547	95.2		42.594	1328
40.5535	126		42.6083	1392		40.56	96.5		42.6083	1345
40.5665	128		42.6226	1432		40.573	96.3		42.6226	1349
40.5795	130		42.6369	1476		40.586	75.7		42.6369	1308
40.5925	130		42.6512	1314		40.599	78.8		42.6512	1345
40.6055	130		42.6655	1442		40.612	98.2		42.6655	1310
40.6185	129		42.6798	1416		40.625	92.2		42.6798	1334
40.6315	127		42.6941	1374		40.638	84.6		42.6941	1308
40.6445	125		42.7084	1400		40.651	81.8		42.7084	1296
40.6575	124		42.7227	1438		40.664	95.9		42.7227	1362
40.6705	123		42.737	1441		40.677	89.7		42.737	1299
40.6835	123		42.7513	1426		40.69	80		42.7513	1321
40.6965	123		42.7656	1394		40.703	79.3		42.7656	1291
40.7095	123		42.7799	1332		40.716	82.2		42.7799	1284
40.7225	123		42.7942	1429		40.729	103.7		42.7942	1349
40.7355	124		42.8085	1302		40.742	109.8		42.8085	1300
40.7485	125		42.8228	1403		40.755	81.8		42.8228	1284
40.7615	127		42.8371	1370		40.768	80.8		42.8371	1302
40.7745	129		42.8514	1406		40.781	79.6		42.8514	1292
40.7875	132		42.8657	1387		40.794	81		42.8657	1265
40.8005	133		42.88	1399		40.807	94.4		42.88	1280
40.8135	134		42.8943	1388		40.82	84.2		42.8943	1342
40.8265	133		42.9086	1387		40.833	76.6		42.9086	1288
40.8395	130		42.9229	1413		40.846	89.2		42.9229	1316
40.8525	126		42.9372	1356		40.859	65.6		42.9372	1261
40.8655	122		42.9515	1356		40.872	84.1		42.9515	1261
40.8785	119		42.9658	1397		40.885	77.5		42.9658	1256
40.8915	117		42.9801	1379		40.898	83		42.9801	1318
40.9045	115		42.9944	1391		40.911	93.1		42.9944	1278
40.9175	116		43.0087	1376		40.924	93.1		43.0087	1252
40.9305	118		43.023	1374		40.937	82.2		43.023	1281
40.9435	122		43.0373	1360		40.95	100.7		43.0373	1276
40.9565	127		43.0516	1407		40.963	93.9		43.0516	1304
40.9695	131		43.0659	1360		40.976	92.2		43.0659	1297
40.9825	134		43.0802	1367		40.989	98.8		43.0802	1283
40.9955	136		43.0945	1333		41.002	89		43.0945	1264
41.0085	135		43.1088	1407		41.015	91		43.1088	1275
41.0215	133		43.1231	1402		41.028	82.1		43.1231	1303
41.0345	131		43.1374	1328		41.041	102.6		43.1374	1311
41.0475	130		43.1517	1328		41.054	82.7		43.1517	1383
41.0605	130		43.166	1412		41.067	94.5		43.166	1301
41.0735	132		43.1803	1312		41.08	85.5		43.1803	1345
41.0865	134		43.1946	1369		41.093	75.6		43.1946	1281
41.0995	135		43.2089	1347		41.106	90.8		43.2089	1284
41.1125	136		43.2232	1378		41.119	78.2		43.2232	1283
41.1255	135		43.2375	1442		41.132	104.3		43.2375	1258
41.1385	133		43.2518	1405		41.145	86.3		43.2518	1326
41.1515	131		43.2661	1348		41.158	86.7		43.2661	1265
41.1645	128		43.2804	1315		41.171	83.5		43.2804	1304
41.1775	126		43.2947	1345		41.184	85.6		43.2947	1308
41.1905	125		43.309	1341		41.197	85.1		43.309	1297
41.2035	125		43.3233	1423		41.21	82.5		43.3233	1293
41.2165	126		43.3376	1323		41.223	78.6		43.3376	1269
41.2295	127		43.3519	1289		41.236	80.5		43.3519	1228
41.2425	128		43.3662	1374		41.249	81.8		43.3662	1248
41.2555	129		43.3805	1432		41.262	80.4		43.3805	1277
41.2685	131		43.3948	1348		41.275	91.2		43.3948	1299
41.2815	132		43.4091	1337		41.288	90		43.4091	1260
41.2945	132		43.4234	1384		41.301	79.6		43.4234	1251
41.3075	132		43.4377	1399		41.314	87.8		43.4377	1265
41.3205	132		43.452	1407		41.327	96.3		43.452	1246
41.3335	131		43.4663	1326		41.34	94.2		43.4663	1259
41.3465	131		43.4806	1396		41.353	87.1		43.4806	1247
41.3595	130		43.4949	1397		41.366	90.8		43.4949	1202
41.3725	129		43.5092	1412		41.379	95.2		43.5092	1213
41.3855	128		43.5235	1394		41.392	85.3		43.5235	1238
41.3985	127		43.5378	1322		41.405	87.3		43.5378	1278
41.4115	126		43.5521	1381		41.418	79.6		43.5521	1279
41.4245	126		43.5664	1346		41.431	74.3		43.5664	1270
41.4375	125		43.5807	1313		41.444	71.3		43.5807	1317
41.4505	125		43.595	1374		41.457	83.9		43.595	1251
41.4635	125		43.6093	1439		41.47	89.7		43.6093	1244
41.4765	124		43.6236	1400		41.483	84.5		43.6236	1239
41.4895	124		43.6379	1397		41.496	84.5		43.6379	1264
41.5025	124		43.6522	1387		41.509	83.5		43.6522	1315
41.5155	124		43.6665	1388		41.522	89.3		43.6665	1270
41.5285	123		43.6808	1396		41.535	89.8		43.6808	1218
41.5415	123		43.6951	1368		41.548	83.4		43.6951	1289
41.5545	123		43.7094	1389		41.561	77.5		43.7094	1277
41.5675	124		43.7237	1378		41.574	80.7		43.7237	1273
41.5805	125		43.738	1401		41.587	84.4		43.738	1328
41.5935	128		43.7523	1358		41.6	86.8		43.7523	1218
41.6065	130		43.7666	1336		41.613	81.4		43.7666	1244
41.6195	133		43.7809	1352		41.626	91		43.7809	1296
41.6325	133		43.7952	1352		41.639	91.4		43.7952	1300
41.6455	132		43.8095	1349		41.652	83.1		43.8095	1266
41.6585	129		43.8238	1363		41.665	92		43.8238	1293
41.6715	126		43.8381	1375		41.678	86.7		43.8381	1251
41.6845	125		43.8524	1410		41.691	81.3		43.8524	1274
41.6975	126		43.8667	1333		41.704	84.2		43.8667	1379
41.7105	130		43.881	1315		41.717	86.1		43.881	1283
41.7235	135		43.8953	1380		41.73	94.7		43.8953	1261
41.7365	139		43.9096	1355		41.743	90.5		43.9096	1299
41.7495	142		43.9239	1348		41.756	85.3		43.9239	1275
41.7625	141		43.9382	1274		41.769	92.7		43.9382	1274
41.7755	139		43.9525	1391		41.782	94.6		43.9525	1258
41.7885	135		43.9668	1391		41.795	90.4		43.9668	1258
41.8015	132		43.9811	1306		41.808	86.2		43.9811	1237
41.8145	130		43.9954	1354		41.821	84.5		43.9954	1224
41.8275	130		44.0097	1298		41.834	80.1		44.0097	1222
41.8405	130		44.024	1285		41.847	78.4		44.024	1217
41.8535	130		44.0383	1336		41.86	74.5		44.0383	1262
41.8665	128		44.0526	1407		41.873	80.7		44.0526	1321
41.8795	124		44.0669	1376		41.886	81.3		44.0669	1270
41.8925	120		44.0812	1336		41.899	76.3		44.0812	1240
41.9055	116		44.0955	1394		41.912	83.3		44.0955	1274
41.9185	116		44.1098	1295		41.925	94.6		44.1098	1268
41.9315	118		44.1241	1395		41.938	86.6		44.1241	1263
41.9445	122		44.1384	1310		41.951	83		44.1384	1215
41.9575	127		44.1527	1298		41.964	87.5		44.1527	1276
41.9705	131		44.167	1343		41.977	85.7		44.167	1253
41.9835	134		44.1813	1371		41.99	84		44.1813	1286
41.9965	135		44.1956	1339		42.003	80		44.1956	1254
42.0095	135		44.2099	1331		42.016	83.3		44.2099	1197
42.0225	135		44.2242	1311		42.029	97		44.2242	1237
42.0355	134		44.2385	1378		42.042	74.5		44.2385	1273
42.0485	133		44.2528	1352		42.055	81.8		44.2528	1243
42.0615	131		44.2671	1329		42.068	87.4		44.2671	1189
42.0745	129		44.2814	1316		42.081	83.4		44.2814	1233
42.0875	126		44.2957	1306		42.094	92.2		44.2957	1228
42.1005	124		44.31	1264		42.107	86		44.31	1239
42.1135	121		44.3243	1284		42.12	94.3		44.3243	1287
42.1265	118		44.3386	1385		42.133	84.1		44.3386	1287
42.1395	116		44.3529	1329		42.146	80.8		44.3529	1330
42.1525	115		44.3672	1353		42.159	89.1		44.3672	1261
42.1655	115		44.3815	1310		42.172	69.8		44.3815	1258
42.1785	115		44.3958	1303		42.185	79.1		44.3958	1311
42.1915	117		44.4101	1360		42.198	103		44.4101	1267
42.2045	121		44.4244	1353		42.211	83.7		44.4244	1246
42.2175	125		44.4387	1293		42.224	79.8		44.4387	1286
42.2305	130		44.453	1321		42.237	78		44.453	1310
42.2435	134		44.4673	1327		42.25	78.5		44.4673	1232
42.2565	135		44.4816	1327		42.263	86.3		44.4816	1232
42.2695	134		44.4959	1374		42.276	72.5		44.4959	1230
42.2825	131		44.5102	1288		42.289	85		44.5102	1260
42.2955	127		44.5245	1339		42.302	86.1		44.5245	1196
42.3085	122		44.5388	1332		42.315	89.9		44.5388	1248
42.3215	118		44.5531	1346		42.328	81		44.5531	1183
42.3345	116		44.5674	1309		42.341	66.2		44.5674	1253
42.3475	116		44.5817	1276		42.354	74.8		44.5817	1214
42.3605	117		44.596	1335		42.367	72.1		44.596	1271
42.3735	118		44.6103	1404		42.38	93.1		44.6103	1256
42.3865	120		44.6246	1313		42.393	73.2		44.6246	1296
42.3995	122		44.6389	1297		42.406	72		44.6389	1280
42.4125	124		44.6532	1288		42.419	86.8		44.6532	1242
42.4255	125		44.6675	1353		42.432	101.8		44.6675	1298
42.4385	126		44.6818	1333		42.445	82.1		44.6818	1246
42.4515	127		44.6961	1299		42.458	85.4		44.6961	1216
42.4645	127		44.7104	1287		42.471	76.2		44.7104	1275
42.4775	127		44.7247	1381		42.484	75		44.7247	1252
42.4905	127		44.739	1325		42.497	75		44.739	1237
42.5035	127		44.7533	1332		42.51	94.7		44.7533	1258
42.5165	127		44.7676	1334		42.523	88.7		44.7676	1249
42.5295	127		44.7819	1308		42.536	83.6		44.7819	1292
42.5425	128		44.7962	1335		42.549	82.2		44.7962	1252
42.5555	129		44.8105	1395		42.562	89.4		44.8105	1282
42.5685	130		44.8248	1284		42.575	91		44.8248	1223
42.5815	131		44.8391	1350		42.588	82.2		44.8391	1267
42.5945	132		44.8534	1307		42.601	80.8		44.8534	1224
42.6075	131		44.8677	1295		42.614	95.8		44.8677	1209
42.6205	130		44.882	1332		42.627	77.7		44.882	1293
42.6335	127		44.8963	1389		42.64	89.2		44.8963	1245
42.6465	125		44.9106	1349		42.653	79.3		44.9106	1205
42.6595	123		44.9249	1329		42.666	93.9		44.9249	1252
42.6725	122		44.9392	1319		42.679	94.4		44.9392	1204
42.6855	122		44.9535	1347		42.692	94.9		44.9535	1308
42.6985	123		44.9678	1320		42.705	93.9		44.9678	1262
42.7115	124		44.9821	1320		42.718	79		44.9821	1262
42.7245	127		44.9964	1319		42.731	85.4		44.9964	1227
42.7375	130		45.0107	1311		42.744	79.5		45.0107	1305
42.7505	132		45.025	1313		42.757	91.4		45.025	1228
42.7635	131		45.0393	1347		42.77	87.5		45.0393	1280
42.7765	128		45.0536	1259		42.783	73.2		45.0536	1212
42.7895	124		45.0679	1320		42.796	84.3		45.0679	1236
42.8025	120		45.0822	1285		42.809	87.3		45.0822	1321
42.8155	118		45.0965	1380		42.822	76.6		45.0965	1286
42.8285	118		45.1108	1330		42.835	83		45.1108	1252
42.8415	122		45.1251	1403		42.848	87.6		45.1251	1237
42.8545	126		45.1394	1341		42.861	91.3		45.1394	1205
42.8675	129		45.1537	1345		42.874	86.3		45.1537	1241
42.8805	129		45.168	1338		42.887	70.3		45.168	1279
42.8935	126		45.1823	1355		42.9	76.4		45.1823	1250
42.9065	122		45.1966	1349		42.913	84.8		45.1966	1258
42.9195	119		45.2109	1325		42.926	92.7		45.2109	1273
42.9325	117		45.2252	1316		42.939	92		45.2252	1198
42.9455	119		45.2395	1321		42.952	86.6		45.2395	1236
42.9585	122		45.2538	1351		42.965	87.5		45.2538	1246
42.9715	125		45.2681	1337		42.978	85.5		45.2681	1292
42.9845	127		45.2824	1423		42.991	89.4		45.2824	1152
42.9975	126		45.2967	1278		43.004	85.3		45.2967	1183
43.0105	124		45.311	1321		43.017	77.4		45.311	1317
43.0235	121		45.3253	1316		43.03	80.8		45.3253	1305
43.0365	119		45.3396	1284		43.043	88.9		45.3396	1231
43.0495	117		45.3539	1283		43.056	86.7		45.3539	1246
43.0625	116		45.3682	1338		43.069	78.9		45.3682	1241
43.0755	116		45.3825	1352		43.082	86.5		45.3825	1230
43.0885	117		45.3968	1377		43.095	83.8		45.3968	1186
43.1015	120		45.4111	1341		43.108	73.4		45.4111	1217
43.1145	124		45.4254	1386		43.121	77.3		45.4254	1223
43.1275	127		45.4397	1445		43.134	85.1		45.4397	1243
43.1405	129		45.454	1354		43.147	88.7		45.454	1221
43.1535	130		45.4683	1345		43.16	89.9		45.4683	1227
43.1665	128		45.4826	1351		43.173	72.4		45.4826	1192
43.1795	126		45.4969	1351		43.186	82.2		45.4969	1192
43.1925	123		45.5112	1373		43.199	95		45.5112	1191
43.2055	122		45.5255	1323		43.212	81.8		45.5255	1249
43.2185	121		45.5398	1389		43.225	75.6		45.5398	1248
43.2315	122		45.5541	1354		43.238	80		45.5541	1230
43.2445	125		45.5684	1428		43.251	90.5		45.5684	1263
43.2575	128		45.5827	1389		43.264	93.9		45.5827	1256
43.2705	131		45.597	1392		43.277	83.7		45.597	1261
43.2835	133		45.6113	1432		43.29	84.4		45.6113	1294
43.2965	134		45.6256	1344		43.303	67.5		45.6256	1243
43.3095	134		45.6399	1407		43.316	73.7		45.6399	1313
43.3225	133		45.6542	1275		43.329	78.3		45.6542	1276
43.3355	131		45.6685	1326		43.342	75.8		45.6685	1264
43.3485	130		45.6828	1372		43.355	78.4		45.6828	1276
43.3615	129		45.6971	1427		43.368	88.2		45.6971	1324
43.3745	129		45.7114	1369		43.381	78.9		45.7114	1336
43.3875	128		45.7257	1441		43.394	83.9		45.7257	1296
43.4005	129		45.74	1466		43.407	71.6		45.74	1306
43.4135	129		45.7543	1411		43.42	80.3		45.7543	1213
43.4265	130		45.7686	1428		43.433	86.4		45.7686	1315
43.4395	130		45.7829	1385		43.446	83.9		45.7829	1313
43.4525	131		45.7972	1315		43.459	88.2		45.7972	1358
43.4655	130		45.8115	1334		43.472	82.9		45.8115	1227
43.4785	126		45.8258	1375		43.485	82		45.8258	1291
43.4915	122		45.8401	1395		43.498	82.7		45.8401	1291
43.5045	117		45.8544	1412		43.511	88.8		45.8544	1319
43.5175	112		45.8687	1355		43.524	86.8		45.8687	1362
43.5305	110		45.883	1458		43.537	84.6		45.883	1359
43.5435	109		45.8973	1480		43.55	79.7		45.8973	1379
43.5565	109		45.9116	1420		43.563	74.6		45.9116	1336
43.5695	110		45.9259	1370		43.576	68.1		45.9259	1373
43.5825	111		45.9402	1370		43.589	91.5		45.9402	1313
43.5955	112		45.9545	1378		43.602	76.1		45.9545	1307
43.6085	113		45.9688	1409		43.615	82		45.9688	1334
43.6215	114		45.9831	1385		43.628	83		45.9831	1334
43.6345	115		45.9974	1373		43.641	74.1		45.9974	1306
43.6475	117		46.0117	1373		43.654	68.1		46.0117	1306
43.6605	120		46.026	1410		43.667	72.9		46.026	1358
43.6735	124		46.0403	1391		43.68	79.8		46.0403	1332
43.6865	128		46.0546	1387		43.693	83.8		46.0546	1354
43.6995	130		46.0689	1363		43.706	101		46.0689	1281
43.7125	128		46.0832	1362		43.719	96.4		46.0832	1282
43.7255	124		46.0975	1481		43.732	84		46.0975	1305
43.7385	120		46.1118	1370		43.745	98.6		46.1118	1364
43.7515	117		46.1261	1391		43.758	78.3		46.1261	1308
43.7645	117		46.1404	1360		43.771	76.9		46.1404	1324
43.7775	119		46.1547	1384		43.784	68.1		46.1547	1416
43.7905	123		46.169	1397		43.797	86.3		46.169	1401
43.8035	127		46.1833	1427		43.81	83.8		46.1833	1326
43.8165	129		46.1976	1435		43.823	83.9		46.1976	1296
43.8295	130		46.2119	1405		43.836	71.3		46.2119	1373
43.8425	129		46.2262	1446		43.849	81.5		46.2262	1379
43.8555	127		46.2405	1519		43.862	71.6		46.2405	1350
43.8685	124		46.2548	1511		43.875	86.1		46.2548	1320
43.8815	121		46.2691	1496		43.888	70.7		46.2691	1456
43.8945	119		46.2834	1415		43.901	84.3		46.2834	1392
43.9075	118		46.2977	1450		43.914	80.4		46.2977	1371
43.9205	118		46.312	1499		43.927	77.2		46.312	1393
43.9335	120		46.3263	1471		43.94	81.6		46.3263	1333
43.9465	121		46.3406	1605		43.953	75.4		46.3406	1417
43.9595	121		46.3549	1479		43.966	79		46.3549	1406
43.9725	119		46.3692	1513		43.979	77.3		46.3692	1404
43.9855	116		46.3835	1525		43.992	78.9		46.3835	1444
43.9985	114		46.3978	1503		44.005	70.7		46.3978	1422
44.0115	112		46.4121	1519		44.018	69.8		46.4121	1528
44.0245	114		46.4264	1476		44.031	88.4		46.4264	1371
44.0375	117		46.4407	1494		44.044	87.8		46.4407	1448
44.0505	121		46.455	1535		44.057	85.4		46.455	1401
44.0635	124		46.4693	1532		44.07	78.7		46.4693	1405
44.0765	125		46.4836	1524		44.083	76.3		46.4836	1500
44.0895	125		46.4979	1470		44.096	82.2		46.4979	1410
44.1025	124		46.5122	1532		44.109	92.6		46.5122	1461
44.1155	123		46.5265	1532		44.122	89.5		46.5265	1461
44.1285	122		46.5408	1543		44.135	84.4		46.5408	1405
44.1415	123		46.5551	1578		44.148	73.7		46.5551	1424
44.1545	123		46.5694	1631		44.161	73		46.5694	1475
44.1675	123		46.5837	1608		44.174	73.5		46.5837	1530
44.1805	124		46.598	1563		44.187	76.8		46.598	1510
44.1935	124		46.6123	1587		44.2	88.4		46.6123	1469
44.2065	123		46.6266	1581		44.213	91.8		46.6266	1459
44.2195	123		46.6409	1674		44.226	85.1		46.6409	1496
44.2325	123		46.6552	1603		44.239	79.4		46.6552	1559
44.2455	122		46.6695	1662		44.252	87		46.6695	1585
44.2585	122		46.6838	1614		44.265	91.9		46.6838	1551
44.2715	121		46.6981	1691		44.278	87		46.6981	1497
44.2845	122		46.7124	1767		44.291	82.5		46.7124	1608
44.2975	122		46.7267	1719		44.304	87.8		46.7267	1551
44.3105	123		46.741	1756		44.317	86		46.741	1620
44.3235	125		46.7553	1730		44.33	70.3		46.7553	1661
44.3365	127		46.7696	1782		44.343	70.5		46.7696	1644
44.3495	129		46.7839	1904		44.356	77.9		46.7839	1676
44.3625	131		46.7982	1840		44.369	85.1		46.7982	1822
44.3755	132		46.8125	1868		44.382	93		46.8125	1726
44.3885	131		46.8268	1922		44.395	89.6		46.8268	1697
44.4015	128		46.8411	1977		44.408	78.9		46.8411	1792
44.4145	124		46.8554	1994		44.421	72.8		46.8554	1879
44.4275	119		46.8697	2039		44.434	77		46.8697	1885
44.4405	115		46.884	2089		44.447	77.4		46.884	1955
44.4535	113		46.8983	2179		44.46	83.2		46.8983	1927
44.4665	112		46.9126	2267		44.473	84.5		46.9126	2082
44.4795	113		46.9269	2351		44.486	69.3		46.9269	2060
44.4925	115		46.9412	2323		44.499	75.2		46.9412	2146
44.5055	118		46.9555	2494		44.512	84.8		46.9555	2244
44.5185	121		46.9698	2514		44.525	74.4		46.9698	2246
44.5315	124		46.9841	2666		44.538	85.5		46.9841	2390
44.5445	126		46.9984	2752		44.551	80.9		46.9984	2347
44.5575	126		47.0127	2950		44.564	78.4		47.0127	2668
44.5705	125		47.027	3058		44.577	70.9		47.027	2682
44.5835	123		47.0413	3336		44.59	75.1		47.0413	2821
44.5965	122		47.0556	3641		44.603	62.4		47.0556	3017
44.6095	122		47.0699	3806		44.616	77.5		47.0699	3153
44.6225	124		47.0842	4038		44.629	90.2		47.0842	3433
44.6355	126		47.0985	4298		44.642	78.7		47.0985	3526
44.6485	128		47.1128	4564		44.655	80.3		47.1128	3897
44.6615	129		47.1271	4799		44.668	81.4		47.1271	4099
44.6745	129		47.1414	5240		44.681	87.2		47.1414	4448
44.6875	126		47.1557	5565		44.694	66.1		47.1557	4790
44.7005	122		47.17	5956		44.707	87.3		47.17	5202
44.7135	118		47.1843	6332		44.72	67.9		47.1843	5596
44.7265	115		47.1986	6657		44.733	80.5		47.1986	5834
44.7395	114		47.2129	6997		44.746	99.8		47.2129	6351
44.7525	115		47.2272	7628		44.759	100.8		47.2272	6703
44.7655	117		47.2415	7840		44.772	83.1		47.2415	7183
44.7785	118		47.2558	8344		44.785	95.8		47.2558	7591
44.7915	118		47.2701	8710		44.798	85.6		47.2701	8192
44.8045	115		47.2844	8953		44.811	75.5		47.2844	8627
44.8175	111		47.2987	9283		44.824	87.1		47.2987	9114
44.8305	107		47.313	9780		44.837	68		47.313	9580
44.8435	106		47.3273	10000		44.85	68.4		47.3273	9836
44.8565	108		47.3416	10046		44.863	74.5		47.3416	9960
44.8695	114		47.3559	10217		44.876	96.1		47.3559	10477
44.8825	121		47.3702	10237		44.889	79.5		47.3702	10596
44.8955	127		47.3845	10238		44.902	92.2		47.3845	10766
44.9085	131		47.3988	10321		44.915	97.5		47.3988	10888
44.9215	131		47.4131	10346		44.928	73.1		47.4131	11006
44.9345	129		47.4274	10150		44.941	82.9		47.4274	10713
44.9475	126		47.4417	9651		44.954	59.2		47.4417	10793
44.9605	123		47.456	9623		44.967	87.5		47.456	10543
44.9735	123		47.4703	9184		44.98	79.2		47.4703	10278
44.9865	124		47.4846	8644		44.993	76.1		47.4846	10088
44.9995	127		47.4989	8473		45.006	72.2		47.4989	9715
45.0125	129		47.5132	8084		45.019	72.9		47.5132	9295
45.0255	130		47.5275	7552		45.032	59		47.5275	8967
45.0385	128		47.5418	7552		45.045	63.5		47.5418	8967
45.0515	124		47.5561	6711		45.058	71.3		47.5561	8084
45.0645	120		47.5704	6451		45.071	93.7		47.5704	7478
45.0775	117		47.5847	5749		45.084	73.7		47.5847	7069
45.0905	114		47.599	5675		45.097	86		47.599	6491
45.1035	113		47.6133	5285		45.11	84.5		47.6133	6084
45.1165	113		47.6276	4894		45.123	80.5		47.6276	5888
45.1295	114		47.6419	4577		45.136	74		47.6419	5545
45.1425	115		47.6562	4240		45.149	87.3		47.6562	4988
45.1555	117		47.6705	3928		45.162	88.3		47.6705	4663
45.1685	118		47.6848	3717		45.175	76.5		47.6848	4356
45.1815	119		47.6991	3633		45.188	81.3		47.6991	4052
45.1945	120		47.7134	3337		45.201	79		47.7134	3862
45.2075	121		47.7277	3154		45.214	80.4		47.7277	3720
45.2205	122		47.742	3066		45.227	86.5		47.742	3467
45.2335	123		47.7563	2869		45.24	72.5		47.7563	3285
45.2465	123		47.7706	2649		45.253	79.5		47.7706	3024
45.2595	123		47.7849	2635		45.266	80		47.7849	2903
45.2725	123		47.7992	2521		45.279	85.7		47.7992	2775
45.2855	122		47.8135	2448		45.292	79.9		47.8135	2688
45.2985	122		47.8278	2292		45.305	79.2		47.8278	2493
45.3115	121		47.8421	2247		45.318	94.3		47.8421	2466
45.3245	120		47.8564	2176		45.331	84.5		47.8564	2382
45.3375	119		47.8707	2108		45.344	84.9		47.8707	2273
45.3505	119		47.885	2053		45.357	84.6		47.885	2211
45.3635	118		47.8993	2018		45.37	76.9		47.8993	2144
45.3765	119		47.9136	1972		45.383	71.3		47.9136	2060
45.3895	119		47.9279	1980		45.396	77.2		47.9279	1982
45.4025	121		47.9422	1856		45.409	77.1		47.9422	1896
45.4155	123		47.9565	1855		45.422	84.5		47.9565	1967
45.4285	125		47.9708	1803		45.435	75.6		47.9708	1840
45.4415	127		47.9851	1826		45.448	75		47.9851	1815
45.4545	127		47.9994	1824		45.461	80.6		47.9994	1780
45.4675	127		48.0137	1789		45.474	88.1		48.0137	1744
45.4805	125		48.028	1691		45.487	88.3		48.028	1751
45.4935	123		48.0423	1751		45.5	93.6		48.0423	1749
45.5065	122		48.0566	1751		45.513	85.9		48.0566	1749
45.5195	122		48.0709	1677		45.526	79.4		48.0709	1645
45.5325	123		48.0852	1703		45.539	79.7		48.0852	1605
45.5455	125		48.0995	1669		45.552	82.9		48.0995	1635
45.5585	126		48.1138	1588		45.565	89.6		48.1138	1529
45.5715	127		48.1281	1585		45.578	86.4		48.1281	1528
45.5845	127		48.1424	1652		45.591	80.5		48.1424	1544
45.5975	128		48.1567	1568		45.604	87.4		48.1567	1581
45.6105	128		48.171	1556		45.617	87.7		48.171	1543
45.6235	128		48.1853	1514		45.63	70		48.1853	1421
45.6365	129		48.1996	1499		45.643	66.5		48.1996	1478
45.6495	129		48.2139	1551		45.656	78.6		48.2139	1490
45.6625	128		48.2282	1506		45.669	83.1		48.2282	1499
45.6755	127		48.2425	1448		45.682	83.3		48.2425	1511
45.6885	126		48.2568	1590		45.695	84.6		48.2568	1475
45.7015	125		48.2711	1550		45.708	94		48.2711	1511
45.7145	124		48.2854	1557		45.721	101.1		48.2854	1459
45.7275	123		48.2997	1454		45.734	97.4		48.2997	1488
45.7405	122		48.314	1486		45.747	100		48.314	1404
45.7535	122		48.3283	1474		45.76	89.4		48.3283	1408
45.7665	123		48.3426	1538		45.773	88.9		48.3426	1458
45.7795	124		48.3569	1452		45.786	83.1		48.3569	1394
45.7925	125		48.3712	1500		45.799	81.2		48.3712	1427
45.8055	126		48.3855	1527		45.812	92.3		48.3855	1393
45.8185	128		48.3998	1509		45.825	92.7		48.3998	1406
45.8315	130		48.4141	1510		45.838	87.7		48.4141	1304
45.8445	132		48.4284	1392		45.851	92.5		48.4284	1397
45.8575	134		48.4427	1404		45.864	101.1		48.4427	1343
45.8705	135		48.457	1360		45.877	90.3		48.457	1359
45.8835	134		48.4713	1336		45.89	87.4		48.4713	1293
45.8965	132		48.4856	1401		45.903	90.7		48.4856	1367
45.9095	128		48.4999	1416		45.916	89.7		48.4999	1392
45.9225	125		48.5142	1412		45.929	85.5		48.5142	1366
45.9355	121		48.5285	1506		45.942	79		48.5285	1352
45.9485	119		48.5428	1355		45.955	91.1		48.5428	1336
45.9615	118		48.5571	1355		45.968	94.5		48.5571	1336
[truncated: 2,617 more rows]

## Sheet: after CO2 5h
GDC			F0.05GDC			F0.1GDC			F0.15GDC
2θ	Relative Intensity		2θ	Relative Intensity		2θ	Relative Intensity		2θ	Relative Intensity
20	12.8531		20.007	6.84746		20	18.9683		20.007	10.0082
20.0143	13.4241		20.02	7.00698		20.0143	19.8467		20.02	10.4122
20.0286	12.8994		20.033	7.8347		20.0286	19.3661		20.033	9.58496
20.0429	12.8492		20.046	8.06044		20.0429	18.902		20.046	9.70519
20.0572	12.5675		20.059	7.61197		20.0572	19.4945		20.059	9.37816
20.0715	13.1926		20.072	6.90164		20.0715	19.4158		20.072	10.0274
20.0858	13.32		20.085	7.13641		20.0858	19.4365		20.085	11.4654
20.1001	13.3624		20.098	7.33807		20.1001	18.96		20.098	11.4413
20.1144	13.1888		20.111	7.1033		20.1144	19.3868		20.111	10.6142
20.1287	13.1695		20.124	6.45618		20.1287	19.3288		20.124	10.9412
20.143	13.1		20.137	7.01601		20.143	19.5525		20.137	10.5131
20.1573	12.8801		20.15	7.27486		20.1573	19.5484		20.15	10.5516
20.1716	13.8177		20.163	6.63376		20.1716	19.8177		20.163	10.2294
20.1859	13.9373		20.176	7.09728		20.1859	19.4821		20.176	9.58977
20.2002	13.127		20.189	7.42235		20.2002	19.1962		20.189	9.74847
20.2145	13.347		20.202	7.18758		20.2145	19.3329		20.202	10.7103
20.2288	12.9881		20.215	6.89261		20.2288	19.4987		20.215	11.2442
20.2431	13.1		20.228	6.97688		20.2431	19.9006		20.228	10.0707
20.2574	13.4512		20.241	6.85047		20.2574	19.9296		20.241	11.0614
20.2717	13.4126		20.254	7.32904		20.2717	19.5898		20.254	11.35
20.286	12.8994		20.267	7.06116		20.286	19.3826		20.267	9.95527
20.3003	12.9071		20.28	7.11835		20.3003	19.2708		20.28	9.47434
20.3146	13.1232		20.293	7.57284		20.3146	19.2915		20.293	10.9075
20.3289	12.9109		20.306	7.81062		20.3289	19.5194		20.306	10.7921
20.3432	13.4087		20.319	7.81965		20.3432	19.7348		20.319	11.2442
20.3575	13.3701		20.332	7.1334		20.3575	19.652		20.332	10.7344
20.3718	13.0884		20.345	8.00927		20.3718	19.2666		20.345	9.67633
20.3861	13.3663		20.358	7.76246		20.3861	19.6354		20.358	10.0899
20.4004	13.4434		20.371	7.19059		20.4004	19.5069		20.371	9.35411
20.4147	12.9727		20.384	7.12738		20.4147	19.2501		20.384	10.2727
20.429	13.2891		20.397	7.97917		20.429	19.6147		20.397	9.2435
20.4433	13.2235		20.41	6.89562		20.4433	19.2708		20.41	10.0082
20.4576	12.5174		20.423	7.17855		20.4576	19.3371		20.423	9.67633
20.4719	13.4859		20.436	7.30496		20.4719	19.681		20.436	9.80618
20.4862	13.5245		20.449	7.16952		20.4862	19.6602		20.449	10.2919
20.5005	12.9881		20.462	6.51938		20.5005	19.076		20.462	10.7681
20.5148	12.9881		20.475	6.77522		20.5148	19.6271		20.475	9.38297
20.5291	12.772		20.488	6.78726		20.5291	19.2956		20.488	9.44549
20.5434	12.9418		20.501	6.5254		20.5434	19.2252		20.501	9.88794
20.5577	12.363		20.514	7.10631		20.5577	19.2376		20.514	10.6286
20.572	12.8646		20.527	6.15218		20.572	19.2583		20.527	10.6767
20.5863	13.0228		20.54	6.9197		20.5863	19.4655		20.54	10.7632
20.6006	12.8415		20.553	6.68192		20.6006	18.5664		20.553	9.71962
20.6149	12.7489		20.566	6.56453		20.6149	19.0843		20.566	10.239
20.6292	12.7797		20.579	6.76619		20.6292	19.9461		20.579	10.34
20.6435	12.7373		20.592	6.8294		20.6435	19.5898		20.592	9.9697
20.6578	12.4903		20.605	6.97688		20.6578	19.6229		20.605	11.8453
20.6721	12.5289		20.618	7.18156		20.6721	19.2666		20.618	10.6526
20.6864	12.9881		20.631	7.67216		20.6864	19.0885		20.631	10.5372
20.7007	13.0807		20.644	7.00698		20.7007	19.4282		20.644	9.14731
20.715	12.9071		20.657	6.31772		20.715	19.2832		20.657	9.9697
20.7293	13.0421		20.67	7.73537		20.7293	19.4489		20.67	8.5221
20.7436	13.3007		20.683	7.15748		20.7436	19.6312		20.683	10.6142
20.7579	13.1232		20.696	7.04611		20.7579	19.9751		20.696	9.84466
20.7722	13.4241		20.709	7.09728		20.7722	19.6271		20.709	9.12326
20.7865	12.9264		20.722	7.25981		20.7865	19.4365		20.722	9.75328
20.8008	12.6563		20.735	6.82037		20.8008	19.4199		20.735	9.69557
20.8151	13.1154		20.748	6.71804		20.8151	19.5939		20.748	11.0133
20.8294	12.9418		20.761	7.11534		20.8294	19.5152		20.761	10.2871
20.8437	12.8724		20.774	6.96785		20.8437	19.5691		20.774	9.58015
20.858	12.5174		20.787	7.21767		20.858	19.3039		20.787	9.39739
20.8723	12.8955		20.8	7.91596		20.8723	20.087		20.8	11.3211
20.8866	12.8724		20.813	6.81736		20.8866	19.3081		20.813	9.74847
20.9009	13.0692		20.826	7.28389		20.9009	18.8772		20.826	9.69076
20.9152	13.0769		20.839	7.30797		20.9152	19.5981		20.839	10.4122
20.9295	12.3013		20.852	6.74512		20.9295	19.3785		20.852	9.98894
20.9438	12.8994		20.865	6.40802		20.9438	19.3992		20.865	9.44549
20.9581	13.2389		20.878	6.64279		20.9581	19.5277		20.878	9.61862
20.9724	13.1386		20.891	6.45317		20.9724	19.4655		20.891	9.5032
20.9867	12.6949		20.904	7.09728		20.9867	19.4572		20.904	9.35411
21.001	12.9225		20.917	6.6157		21.001	18.5581		20.917	9.36373
21.0153	12.3746		20.93	6.51336		21.0153	19.0926		20.93	9.61862
21.0296	12.7759		20.943	6.08596		21.0296	19.6602		20.943	9.2435
21.0439	12.0543		20.956	6.69998		21.0439	19.4904		20.956	9.80618
21.0582	12.1238		20.969	6.82639		21.0582	18.873		20.969	9.56091
21.0725	12.2511		20.982	6.16723		21.0725	18.931		20.982	9.05593
21.0868	12.2781		20.995	6.79328		21.0868	19.3329		20.995	9.64267
21.1011	12.4209		21.008	7.05815		21.1011	19.0014		21.008	10.3448
21.1154	12.8029		21.021	7.32001		21.1154	18.5954		21.021	9.7629
21.1297	12.7913		21.034	7.03106		21.1297	19.3743		21.034	9.11845
21.144	12.5212		21.047	6.66687		21.144	18.8772		21.047	10.0082
21.1583	12.7257		21.06	6.49229		21.1583	18.9434		21.06	9.59938
21.1726	12.8917		21.073	6.5555		21.1726	18.989		21.073	9.72443
21.1869	12.8762		21.086	6.97086		21.1869	19.2376		21.086	11.1816
21.2012	12.2974		21.099	6.68794		21.2012	19.0346		21.099	11.0229
21.2155	12.7836		21.112	6.40802		21.2155	19.0056		21.112	10.3256
21.2298	12.5444		21.125	6.36889		21.2298	19.2376		21.125	9.94565
21.2441	12.8145		21.138	6.02576		21.2441	19.0304		21.138	9.76771
21.2584	12.5289		21.151	6.45919		21.2584	19.8964		21.151	10.3064
21.2727	13.1965		21.164	6.82037		21.2727	19.4862		21.164	10.4939
21.287	12.7103		21.177	6.93475		21.287	19.3081		21.177	10.1188
21.3013	12.4055		21.19	6.79328		21.3013	18.9642		21.19	10.1044
21.3156	12.4479		21.203	6.51637		21.3156	19.3578		21.203	10.5083
21.3299	13.0537		21.216	7.00698		21.3299	18.7156		21.216	10.3015
21.3442	12.7643		21.229	7.43438		21.3442	19.3412		21.229	9.62824
21.3585	12.5444		21.242	7.13942		21.3585	19.6271		21.242	9.42625
21.3728	12.6756		21.255	6.42608		21.3728	19.4489		21.255	8.9357
21.3871	12.6949		21.268	6.87455		21.3871	19.1092		21.268	8.69523
21.4014	13.1425		21.281	7.63605		21.4014	19.1838		21.281	8.64233
21.4157	12.6138		21.294	7.35011		21.4157	18.9642		21.294	8.86837
21.43	12.6215		21.307	7.01601		21.43	19.0885		21.307	9.90718
21.4443	12.7219		21.32	6.29364		21.4443	19.6768		21.32	9.17617
21.4586	12.7103		21.333	6.2485		21.4586	19.8674		21.333	8.53172
21.4729	12.9765		21.346	6.50132		21.4729	19.5194		21.346	9.87352
21.4872	12.8068		21.359	6.6157		21.4872	19.9006		21.359	10.518
21.5015	12.8068		21.372	6.73609		21.5015	19.9006		21.372	9.37335
21.5158	12.5019		21.385	6.81736		21.5158	18.6286		21.385	9.18578
21.5301	12.2164		21.398	6.86552		21.5301	19.0429		21.398	9.87832
21.5444	12.5984		21.411	6.47424		21.5444	18.6368		21.411	9.64267
21.5587	11.954		21.424	7.02203		21.5587	18.6824		21.424	8.89723
21.573	12.2318		21.437	7.19359		21.573	18.873		21.437	8.77218
21.5873	12.3939		21.45	6.59463		21.5873	18.8772		21.45	9.49358
21.6016	12.3592		21.463	6.84746		21.6016	18.9103		21.463	9.80618
21.6159	11.9733		21.476	6.75114		21.6159	18.6741		21.476	10.2679
21.6302	12.3862		21.489	6.36287		21.6302	19.047		21.489	9.69076
21.6445	11.8421		21.502	6.89261		21.6445	18.6244		21.502	10.215
21.6588	12.7952		21.515	7.40128		21.6588	19.047		21.515	9.31564
21.6731	12.1238		21.528	6.69697		21.6731	19.1879		21.528	10.2631
21.6874	12.1006		21.541	6.28461		21.6874	18.6907		21.541	8.90684
21.7017	12.6447		21.554	6.32073		21.7017	19.2749		21.554	8.4692
21.716	12.4788		21.567	7.13641		21.716	18.9766		21.567	9.88794
21.7303	12.6833		21.58	6.42006		21.7303	19.0512		21.58	9.87352
21.7446	12.1238		21.593	7.09427		21.7446	18.7487		21.593	9.99375
21.7589	12.5907		21.606	6.65483		21.7589	19.1547		21.606	9.52244
21.7732	12.583		21.619	6.95582		21.7732	19.5774		21.619	9.50801
21.7875	12.4055		21.632	7.11233		21.7875	19.3163		21.632	10.1428
21.8018	12.1662		21.645	7.13942		21.8018	18.5498		21.645	9.3493
21.8161	12.7103		21.658	6.95882		21.8161	18.8564		21.658	8.96936
21.8304	12.2357		21.671	6.60065		21.8304	18.4545		21.671	9.21945
21.8447	12.3322		21.684	6.36287		21.8447	19.0387		21.684	10.0996
21.859	12.3823		21.697	6.84445		21.859	19.2915		21.697	10.6478
21.8733	12.4132		21.71	6.87756		21.8733	18.7114		21.71	10.138
21.8876	12.4981		21.723	6.56453		21.8876	18.9393		21.723	10.316
21.9019	12.282		21.736	6.83843		21.9019	18.467		21.736	9.32525
21.9162	12.4518		21.749	6.60065		21.9162	19.0263		21.749	9.87832
21.9305	12.1547		21.762	6.36287		21.9305	19.2045		21.762	11.0566
21.9448	12.4711		21.775	6.15519		21.9448	18.9849		21.775	9.79657
21.9591	12.4441		21.788	6.37491		21.9591	19.6561		21.788	9.59458
21.9734	12.8685		21.801	6.77823		21.9734	19.1175		21.801	9.18097
21.9877	12.3283		21.814	6.29063		21.9877	19.1258		21.814	10.0707
22.002	12.3476		21.827	6.31772		22.002	18.757		21.827	9.31564
22.0163	12.3476		21.84	7.42536		22.0163	18.757		21.84	10.5709
22.0306	12.1354		21.853	6.92271		22.0306	18.4587		21.853	9.80618
22.0449	12.0312		21.866	6.9829		22.0449	19.0429		21.866	9.1425
22.0592	11.9617		21.879	7.39827		22.0592	18.728		21.879	8.5221
22.0735	11.6878		21.892	6.52239		22.0735	18.2722		21.892	9.73405
22.0878	12.0003		21.905	6.90766		22.0878	18.8606		21.905	8.78661
22.1021	12.062		21.918	6.80833		22.1021	19.3495		21.918	8.9357
22.1164	12.3206		21.931	6.66085		22.1164	18.6203		21.931	8.17102
22.1307	11.6299		21.944	6.84746		22.1307	18.6617		21.944	8.30568
22.145	12.0736		21.957	7.28088		22.145	18.9807		21.957	8.14216
22.1593	11.9579		21.97	6.59764		22.1593	18.5871		21.97	9.62343
22.1736	12.1739		21.983	6.66687		22.1736	18.7238		21.983	9.15212
22.1879	12.0813		21.996	6.49229		22.1879	18.5415		21.996	9.43587
22.2022	11.6029		22.009	6.71202		22.2022	18.7156		22.009	9.0896
22.2165	12.2087		22.022	6.84746		22.2165	18.7031		22.022	8.70485
22.2308	12.3514		22.035	7.30496		22.2308	18.5084		22.035	10.0322
22.2451	12.1971		22.048	6.31772		22.2451	18.467		22.048	9.66671
22.2594	12.5328		22.061	6.36889		22.2594	19.1423		22.061	9.07998
22.2737	12.0389		22.074	6.33578		22.2737	19.0926		22.074	8.70966
22.288	11.9077		22.087	6.74211		22.288	18.525		22.087	8.18064
22.3023	11.7649		22.1	6.66085		22.3023	18.7653		22.1	9.06074
22.3166	12.0505		22.113	6.0378		22.3166	18.6161		22.113	8.96936
22.3309	11.9116		22.126	6.09198		22.3309	19.1713		22.126	8.82028
22.3452	12.2473		22.139	6.16422		22.3452	18.5913		22.139	8.68562
22.3595	12.1122		22.152	6.56754		22.3595	18.6617		22.152	9.33006
22.3738	12.3283		22.165	7.12136		22.3738	18.9766		22.165	9.52244
22.3881	12.0505		22.178	7.00397		22.3881	18.5747		22.178	9.4503
22.4024	11.8267		22.191	6.6759		22.4024	19.1009		22.191	9.74847
22.4167	11.4408		22.204	6.36889		22.4167	19.0263		22.204	8.90203
22.431	12.1739		22.217	6.63978		22.431	19.1796		22.217	9.05112
22.4453	12.0312		22.23	6.706		22.4453	18.496		22.23	9.20021
22.4596	11.9231		22.243	6.5555		22.4596	18.9144		22.243	9.56091
22.4739	11.9617		22.256	6.83843		22.4739	18.6617		22.256	9.37816
22.4882	12.2203		22.269	6.46521		22.4882	18.9269		22.269	8.44034
22.5025	11.8267		22.282	6.51637		22.5025	18.7901		22.282	8.66638
22.5168	11.8267		22.295	6.1883		22.5168	18.7901		22.295	9.90718
22.5311	11.4678		22.308	6.51336		22.5311	18.2888		22.308	10.1669
22.5454	11.8035		22.321	6.68493		22.5454	18.3634		22.321	9.33487
22.5597	12.0427		22.334	6.67891		22.5597	18.2225		22.334	8.7289
22.574	11.7071		22.347	6.50433		22.574	18.3717		22.347	9.21464
22.5883	11.5218		22.36	6.84445		22.5883	18.3178		22.36	8.97417
22.6026	11.3984		22.373	6.65784		22.6026	18.3675		22.373	9.01746
22.6169	12.0273		22.386	6.29665		22.6169	18.1313		22.386	8.9357
22.6312	11.9154		22.399	6.03178		22.6312	18.67		22.399	8.4211
22.6455	11.9656		22.412	6.14917		22.6455	18.3924		22.412	8.22392
22.6598	11.8035		22.425	6.26655		22.6598	19.0304		22.425	8.60867
22.6741	11.7919		22.438	5.98062		22.6741	18.2349		22.438	9.27235
22.6884	11.9733		22.451	6.05586		22.6884	18.4421		22.451	9.67633
22.7027	11.6415		22.464	6.08295		22.7027	18.525		22.464	9.32044
22.717	11.8498		22.477	5.92945		22.717	18.7736		22.477	9.35411
22.7313	11.5411		22.49	6.24248		22.7313	18.6617		22.49	9.19059
22.7456	11.5257		22.503	6.60667		22.7456	18.7528		22.503	8.70485
22.7599	12.1431		22.516	6.44113		22.7599	18.5705		22.516	8.51248
22.7742	11.7688		22.529	5.96557		22.7742	18.6203		22.529	8.64714
22.7885	11.8421		22.542	6.29665		22.7885	18.6617		22.542	8.87799
22.8028	11.4331		22.555	6.48627		22.8028	18.1023		22.555	9.04631
22.8171	11.3598		22.568	6.37792		22.8171	18.2722		22.568	9.20021
22.8314	11.7765		22.581	6.65784		22.8314	18.2722		22.581	9.07998
22.8457	11.9887		22.594	6.34782		22.8457	18.8896		22.594	8.71928
22.86	12.2395		22.607	6.32073		22.86	18.1231		22.607	8.19026
22.8743	11.653		22.62	6.1883		22.8743	18.467		22.62	9.09922
22.8886	12.0659		22.633	6.14616		22.8886	18.496		22.633	9.95046
22.9029	11.5913		22.646	6.24248		22.9029	18.1148		22.646	9.42625
22.9172	11.7302		22.659	5.86022		22.9172	18.5457		22.659	9.35892
22.9315	11.3443		22.672	6.18228		22.9315	18.5001		22.672	9.25311
22.9458	11.7418		22.685	6.56152		22.9458	18.6203		22.685	9.00303
22.9601	11.7341		22.698	6.68493		22.9601	18.3717		22.698	8.85875
22.9744	11.7919		22.711	6.27257		22.9744	18.3219		22.711	8.08445
22.9887	11.8035		22.724	6.35083		22.9887	18.6203		22.724	8.13735
23.003	11.8537		22.737	6.26354		23.003	19.4904		22.737	9.10403
23.0173	11.7649		22.75	5.7609		23.0173	19.1796		22.75	9.57053
23.0316	11.7649		22.763	5.73983		23.0316	19.1796		22.763	9.35411
23.0459	11.464		22.776	6.16723		23.0459	18.2308		22.776	9.06074
23.0602	11.5952		22.789	6.52841		23.0602	18.5415		22.789	9.97451
23.0745	11.4408		22.802	6.64881		23.0745	18.1023		22.802	9.58496
23.0888	11.1977		22.815	6.58259		23.0888	17.7584		22.815	8.85875
23.1031	11.1013		22.828	6.65784		23.1031	17.9698		22.828	9.15212
23.1174	11.4369		22.841	5.74284		23.1174	17.7626		22.841	9.25792
23.1317	10.9855		22.854	6.17927		23.1317	18.1728		22.854	9.41663
23.146	11.2942		22.867	6.01373		23.146	18.1645		22.867	9.15693
23.1603	11.6337		22.88	6.11907		23.1603	18.1976		22.88	8.82509
23.1746	11.7997		22.893	5.64652		23.1746	18.5084		22.893	8.47881
23.1889	11.7109		22.906	6.32675		23.1889	18.2805		22.906	8.32011
23.2032	11.4254		22.919	6.91368		23.2032	18.2846		22.919	9.05593
23.2175	11.1205		22.932	6.71503		23.2175	18.0899		22.932	9.58496
23.2318	11.1167		22.945	6.60667		23.2318	18.1189		22.945	8.92127
23.2461	11.5527		22.958	6.73609		23.2461	18.0236		22.958	8.58943
23.2604	11.0974		22.971	7.06417		23.2604	18.2598		22.971	8.72409
23.2747	11.2865		22.984	7.16952		23.2747	18.3219		22.984	8.60386
23.289	11.4794		22.997	6.18228		23.289	17.804		22.997	8.86837
23.3033	11.464		23.01	6.57356		23.3033	18.4338		23.01	9.09441
23.3176	11.68		23.023	6.05285		23.3176	18.5001		23.023	9.66671
23.3319	11.1051		23.036	6.3719		23.3319	18.1935		23.036	8.53172
23.3462	11.5296		23.049	6.77221		23.3462	17.9408		23.049	8.64233
23.3605	11.1784		23.062	6.24549		23.3605	18.1562		23.062	8.21911
23.3748	11.6144		23.075	7.06417		23.3748	18.3095		23.075	10.2823
23.3891	11.3559		23.088	6.51938		23.3891	18.1935		23.088	9.48877
23.4034	11.2363		23.101	5.8843		23.4034	18.3924		23.101	8.9886
23.4177	11.4755		23.114	6.13713		23.4177	18.5457		23.114	8.8828
23.432	11.0858		23.127	5.40874		23.432	18.3136		23.127	8.575
23.4463	11.2093		23.14	5.98363		23.4463	17.8289		23.14	9.0415
23.4606	10.9469		23.153	5.77895		23.4606	18.3219		23.153	9.05112
23.4749	11.3675		23.166	5.80905		23.4749	18.0236		23.166	9.61381
23.4892	11.6299		23.179	5.89935		23.4892	18.2846		23.179	8.70966
23.5035	11.4717		23.192	6.22442		23.5035	18.2929		23.192	9.08479
23.5178	11.5025		23.205	6.46521		23.5178	18.5498		23.205	9.0896
23.5321	11.7379		23.218	5.65856		23.5321	18.4255		23.218	9.27716
23.5464	11.7379		23.231	6.66085		23.5464	18.4255		23.231	10.4747
23.5607	11.3482		23.244	6.05887		23.5607	18.2598		23.244	8.21911
23.575	11.2788		23.257	5.85119		23.575	17.4145		23.257	8.61828
23.5893	11.1746		23.27	7.03407		23.5893	17.514		23.27	8.96936
23.6036	10.9893		23.283	6.38996		23.6036	17.7502		23.283	9.17136
23.6179	10.5842		23.296	5.6405		23.6179	17.6839		23.296	9.05593
23.6322	10.9585		23.309	6.53744		23.6322	18.5664		23.309	9.68595
23.6465	11.0627		23.322	7.07621		23.6465	17.5803		23.322	8.99822
23.6608	11.0318		23.335	6.13412		23.6608	17.2447		23.335	8.31049
23.6751	11.3135		23.348	5.54719		23.6751	17.7543		23.348	8.43072
23.6894	11.3559		23.361	6.2485		23.6894	17.9863		23.361	8.54615
23.7037	11.2324		23.374	6.45618		23.7037	18.3468		23.374	9.57534
23.718	10.9122		23.387	6.11907		23.718	17.6963		23.387	8.07964
23.7323	10.9392		23.4	6.17325		23.7323	17.7377		23.4	9.17136
23.7466	11.2633		23.413	5.92945		23.7466	17.8869		23.413	10.1813
23.7609	10.943		23.426	5.82109		23.7609	17.514		23.426	8.2143
23.7752	11.2749		23.439	7.00397		23.7752	18.1396		23.439	9.91199
23.7895	11.0395		23.452	6.06188		23.7895	17.6714		23.452	9.0896
23.8038	11.3521		23.465	6.11606		23.8038	17.9905		23.465	7.69971
23.8181	11.217		23.478	6.13713		23.8181	18.0153		23.478	8.7289
23.8324	11.0974		23.491	7.10932		23.8324	18.0236		23.491	9.42625
23.8467	10.7848		23.504	6.56152		23.8467	17.7419		23.504	8.58943
23.861	10.781		23.517	6.50433		23.861	17.4891		23.517	8.23835
23.8753	11.0549		23.53	6.20034		23.8753	17.543		23.53	7.91132
23.8896	11.19		23.543	5.66157		23.8896	18.4297		23.543	9.02708
23.9039	11.1591		23.556	6.0378		23.9039	17.746		23.556	8.60867
23.9182	11.5141		23.569	6.13412		23.9182	17.804		23.569	8.69042
23.9325	10.9508		23.582	5.79099		23.9325	17.6922		23.582	8.30568
23.9468	10.9353		23.595	5.80002		23.9468	17.6756		23.595	8.58462
23.9611	11.2942		23.608	5.64953		23.9611	17.5968		23.608	8.05079
23.9754	11.3058		23.621	6.13111		23.9754	18.0443		23.621	7.74299
23.9897	10.7501		23.634	6.13111		23.9897	17.5968		23.634	8.90684
24.004	10.9778		23.647	6.28461		24.004	17.891		23.647	8.84913
24.0183	11.2054		23.66	6.00169		24.0183	18.2515		23.66	9.0367
24.0326	11.0279		23.673	6.14616		24.0326	18.1396		23.673	8.45958
24.0469	11.0279		23.686	6.13713		24.0469	18.1396		23.686	8.90684
24.0612	10.6228		23.699	6.24549		24.0612	17.0665		23.699	8.91165
24.0755	11.0434		23.712	5.80604		24.0755	17.7046		23.712	9.11364
24.0898	10.4993		23.725	5.72177		24.0898	17.2239		23.725	10.0707
24.1041	10.9469		23.738	6.19432		24.1041	17.282		23.738	9.50801
24.1184	10.7463		23.751	6.38394		24.1184	17.2447		23.751	8.2143
24.1327	10.8157		23.764	6.37792		24.1327	16.9505		23.764	8.0075
24.147	10.7115		23.777	6.1883		24.147	17.3441		23.777	8.66157
24.1613	10.7308		23.79	6.06489		24.1613	17.3524		23.79	8.76256
24.1756	11.2093		23.803	5.90838		24.1756	16.9588		23.803	8.53653
24.1899	10.9353		23.816	5.77895		24.1899	17.1535		23.816	9.14731
24.2042	10.0131		23.829	6.01974		24.2042	17.4684		23.829	8.95013
24.2185	10.6652		23.842	6.0679		24.2185	17.2778		23.842	9.15693
24.2328	10.1134		23.855	6.30267		24.2328	18.0485		23.855	9.73885
24.2471	11.1476		23.868	6.58861		24.2471	17.456		23.868	9.12326
24.2614	10.9238		23.881	6.38394		24.2614	17.1411		23.881	9.34449
24.2757	10.9392		23.894	6.45919		24.2757	17.4104		23.894	9.61381
24.29	10.7655		23.907	6.3418		24.29	17.0997		23.907	9.10883
24.3043	10.4954		23.92	6.17325		24.3043	17.5223		23.92	8.56057
24.3186	10.5842		23.933	6.13111		24.3186	17.7336		23.933	8.93089
24.3329	10.7385		23.946	5.93848		24.3329	17.5927		23.946	8.95013
24.3472	11.1283		23.959	6.1582		24.3472	17.6714		23.959	8.60386
24.3615	10.7617		23.972	6.31471		24.3615	17.2778		23.972	9.14731
24.3758	10.8543		23.985	6.19432		24.3758	17.4353		23.985	8.59424
24.3901	10.6498		23.998	5.72779		24.3901	17.4808		23.998	9.05112
24.4044	10.7733		24.011	6.19131		24.4044	17.7004		24.011	8.69042
24.4187	10.7694		24.024	6.28461		24.4187	18.0195		24.024	8.8347
24.433	10.9238		24.037	5.75488		24.433	17.6176		24.037	8.71928
24.4473	10.5572		24.05	5.30641		24.4473	17.3358		24.05	8.23835
24.4616	10.5379		24.063	5.43282		24.4616	17.0706		24.063	8.5221
24.4759	10.6344		24.076	5.50205		24.4759	17.6134		24.076	8.79142
24.4902	10.7463		24.089	5.42379		24.4902	17.3855		24.089	8.4692
24.5045	10.6884		24.102	5.93246		24.5045	17.0333		24.102	8.04598
24.5188	10.9469		24.115	5.46894		24.5188	17.1328		24.115	8.09407
24.5331	10.7655		24.128	5.49001		24.5331	17.2198		24.128	8.22873
24.5474	10.9739		24.141	6.17626		24.5474	17.2778		24.141	8.95013
24.5617	10.9739		24.154	5.93547		24.5617	17.2778		24.154	9.5032
24.576	10.5996		24.167	5.96557		24.576	16.7972		24.167	7.81032
24.5903	10.4453		24.18	6.02275		24.5903	17.0997		24.18	8.72409
24.6046	10.7733		24.193	6.00771		24.6046	17.1245		24.193	7.67085
24.6189	10.3179		24.206	5.66458		24.6189	17.1121		24.206	8.54134
24.6332	10.5109		24.219	6.17024		24.6332	16.6977		24.219	9.48396
24.6475	10.6729		24.232	6.32976		24.6475	17.3234		24.232	8.9357
24.6618	10.3218		24.245	6.62473		24.6618	17.1825		24.245	7.93536
24.6761	10.3372		24.258	7.09728		24.6761	16.8055		24.258	7.35825
24.6904	10.5533		24.271	6.56453		24.6904	17.0292		24.271	8.09888
24.7047	9.86263		24.284	6.24248		24.7047	16.4947		24.284	9.41663
24.719	10.1829		24.297	6.13111		24.719	16.4699		24.297	8.85394
24.7333	10.2987		24.31	6.06489		24.7333	16.7392		24.31	7.65642
24.7476	10.5418		24.323	5.97761		24.7476	17.2571		24.323	9.32044
24.7619	10.2523		24.336	6.11907		24.7619	17.1742		24.336	9.27235
24.7762	10.2485		24.349	6.11305		24.7762	17.2571		24.349	9.45511
24.7905	9.97453		24.362	5.36058		24.7905	17.717		24.362	8.49324
24.8048	10.6382		24.375	5.76692		24.8048	16.9422		24.375	9.17617
24.8191	10.4646		24.388	6.59463		24.8191	16.9298		24.388	8.0556
24.8334	10.7501		24.401	5.48399		24.8334	17.0748		24.401	8.92127
24.8477	10.4954		24.414	6.02877		24.8477	17.1328		24.414	7.07931
24.862	10.8813		24.427	5.70973		24.862	16.8096		24.427	8.17583
24.8763	10.5688		24.44	6.9197		24.8763	16.8925		24.44	9.2483
24.8906	10.4877		24.453	5.86925		24.8906	16.8593		24.453	8.22873
24.9049	10.3295		24.466	5.92343		24.9049	17.1369		24.466	8.45958
24.9192	10.3951		24.479	5.35757		24.9192	17.0333		24.479	8.22392
24.9335	10.0633		24.492	5.41777		24.9335	16.4533		24.492	7.98346
24.9478	10.1983		24.505	5.50506		24.9478	17.0955		24.505	8.78661
24.9621	10.4414		24.518	6.64881		24.9621	16.6522		24.518	9.73405
24.9764	10.6884		24.531	6.01673		24.9764	17.0624		24.531	9.58015
24.9907	10.2138		24.544	5.64652		24.9907	16.9505		24.544	9.57053
25.005	10.5418		24.557	6.39297		25.005	16.9463		24.557	8.53172
25.0193	10.6074		24.57	6.74813		25.0193	16.8842		24.57	8.59905
25.0336	10.0633		24.583	5.91139		25.0336	17.1949		24.583	9.00784
25.0479	10.3411		24.596	5.67361		25.0479	17.0541		24.596	7.46405
25.0622	10.6537		24.609	5.63147		25.0622	17.3773		24.609	7.52657
25.0765	10.6537		24.622	5.54719		25.0765	17.3773		24.622	8.36339
25.0908	10.2678		24.635	6.14917		25.0908	16.9463		24.635	8.25278
25.1051	10.2022		24.648	5.65254		25.1051	16.5113		24.648	8.09888
25.1194	10.3758		24.661	5.98363		25.1194	16.1342		24.661	8.20468
25.1337	9.95524		24.674	6.33277		25.1337	16.0348		24.674	8.0604
25.148	10.1868		24.687	5.74886		25.148	16.0514		24.687	8.3153
25.1623	10.1598		24.7	5.37864		25.1623	16.8966		24.7	8.92608
25.1766	9.90122		24.713	5.64953		25.1766	16.6729		24.713	8.32973
25.1909	9.79704		24.726	6.0378		25.1909	16.1674		24.726	9.19059
25.2052	10.0594		24.739	6.01373		25.2052	16.677		24.739	8.65676
25.2195	10.0015		24.752	6.0378		25.2195	16.5444		24.752	7.58909
25.2338	10.4916		24.765	5.81507		25.2338	16.6605		24.765	8.41148
25.2481	10.3064		24.778	6.19131		25.2481	16.4367		24.778	8.22392
25.2624	10.044		24.791	5.90838		25.2624	16.4616		24.791	8.5221
25.2767	10.017		24.804	5.95955		25.2767	16.7267		24.804	8.80104
25.291	9.87421		24.817	5.68565		25.291	16.6439		24.817	7.8488
25.3053	10.5765		24.83	6.2515		25.3053	16.4077		24.83	7.95941
25.3196	10.0401		24.843	6.50132		25.3196	16.0099		24.843	8.26721
25.3339	10.1404		24.856	6.30869		25.3339	17.0002		24.856	7.59871
25.3482	9.93209		24.869	5.74284		25.3482	17.2529		24.869	7.41115
25.3625	10.3411		24.882	6.16422		25.3625	16.5942		24.882	7.52176
25.3768	9.93209		24.895	5.49603		25.3768	16.6356		24.895	7.45443
25.3911	9.82405		24.908	5.17698		25.3911	16.793		24.908	8.37782
25.4054	10.1636		24.921	5.55622		25.4054	16.532		24.921	8.18064
25.4197	10.2022		24.934	5.93547		25.4197	16.2461		24.934	8.02674
25.434	10.2369		24.947	6.1281		25.434	16.5776		24.947	8.03636
25.4483	9.93981		24.96	6.0378		25.4483	16.5154		24.96	7.77185
25.4626	9.70443		24.973	5.43282		25.4626	16.6066		24.973	8.09888
25.4769	10.0131		24.986	5.52312		25.4769	16.59		24.986	7.98346
25.4912	10.0131		24.999	5.43282		25.4912	16.4119		24.999	7.85841
25.5055	10.4877		25.012	5.08066		25.5055	16.5859		25.012	7.5939
25.5198	10.1868		25.025	5.38165		25.5198	16.2213		25.025	7.07931
25.5341	10.4491		25.038	5.65856		25.5341	16.2958		25.038	7.1803
25.5484	10.2987		25.051	5.92945		25.5484	16.0431		25.051	7.67566
25.5627	10.1096		25.064	5.72177		25.5627	16.9173		25.064	8.66157
25.577	10.5186		25.077	5.78196		25.577	16.4119		25.077	8.88761
25.5913	10.5186		25.09	6.02877		25.5913	16.4119		25.09	7.94498
25.6056	9.97067		25.103	5.86624		25.6056	15.8194		25.103	7.55543
25.6199	10.152		25.116	6.01072		25.6199	16.4284		25.116	7.96903
25.6342	10.5109		25.129	6.30568		25.6342	16.4533		25.129	8.39225
25.6485	10.1906		25.142	6.48627		25.6485	16.2337		25.142	9.0367
25.6628	10.3218		25.155	6.31471		25.6628	16.1094		25.155	8.75295
25.6771	10.2987		25.168	6.14917		25.6771	16.6439		25.168	8.89242
25.6914	10.2253		25.181	5.91139		25.6914	16.8925		25.181	9.50801
25.7057	10.2562		25.194	5.38165		25.7057	16.4699		25.194	8.29125
25.72	10.4684		25.207	5.4268		25.72	16.6315		25.207	7.86322
25.7343	10.3758		25.22	6.06188		25.7343	16.1674		25.22	7.94979
25.7486	9.85492		25.233	6.17325		25.7486	16.2461		25.233	8.10369
25.7629	10.1404		25.246	6.07994		25.7629	16.1177		25.246	7.96422
25.7772	9.98225		25.259	6.55851		25.7772	16.4533		25.259	7.38229
25.7915	10.0015		25.272	5.98664		25.7915	16.7806		25.272	8.77218
25.8058	10.3064		25.285	6.19131		25.8058	16.3829		25.285	8.69042
25.8201	10.0054		25.298	6.59162		25.8201	16.213		25.298	7.9546
25.8344	9.60025		25.311	5.92644		25.8344	15.8276		25.311	7.56505
25.8487	9.92823		25.324	5.89935		25.8487	15.9064		25.324	8.29125
25.863	9.90508		25.337	5.17397		25.863	16.0679		25.337	8.0556
25.8773	9.90894		25.35	4.82784		25.8773	16.0969		25.35	7.97865
25.8916	9.9128		25.363	5.52011		25.8916	15.8815		25.363	7.47848
25.9059	10.1019		25.376	5.45991		25.9059	16.0597		25.376	8.13735
25.9202	9.85492		25.389	5.71575		25.9202	16.2088		25.389	8.33934
25.9345	10.1829		25.402	5.53516		25.9345	15.7779		25.402	8.18545
25.9488	9.64269		25.415	5.88129		25.9488	15.9519		25.415	8.39706
25.9631	9.81633		25.428	6.47424		25.9631	16.3083		25.428	9.13288
25.9774	9.66198		25.441	6.11305		25.9774	16.2213		25.441	8.48362
25.9917	9.9591		25.454	5.77294		25.9917	16.3663		25.454	8.35858
26.006	10.0208		25.467	5.32747		26.006	15.4423		25.467	7.25725
26.0203	9.86649		25.48	5.54719		26.0203	16.0845		25.48	7.87284
26.0346	9.69285		25.493	5.59234		26.0346	15.5873		25.493	7.89689
26.0489	9.87807		25.506	6.21238		26.0489	15.7075		25.506	7.93055
26.0632	9.46134		25.519	5.97159		26.0632	15.5293		25.519	9.01746
26.0775	10.0401		25.532	6.12208		26.0775	16.0348		25.532	8.6279
26.0918	9.81633		25.545	6.01072		26.0918	15.6536		25.545	8.76256
26.1061	9.7353		25.558	5.94149		26.1061	15.5998		25.558	7.97865
26.1204	9.49606		25.571	6.402		26.1204	16.3621		25.571	7.30053
26.1347	9.71601		25.584	6.20034		26.1347	15.4092		25.584	8.38263
26.149	9.48063		25.597	5.49904		26.149	15.4879		25.597	7.97865
26.1633	9.50378		25.61	6.08295		26.1633	15.4547		25.61	8.40668
26.1776	9.18352		25.623	5.72177		26.1776	15.2724		25.623	9.41182
26.1919	9.29927		25.636	5.76391		26.1919	15.6039		25.636	8.32011
26.2062	9.33014		25.649	5.82711		26.2062	15.3222		25.649	8.3153
26.2205	9.29927		25.662	5.49302		26.2205	15.8939		25.662	8.24316
26.2348	9.25683		25.675	5.62846		26.2348	15.4465		25.675	8.14216
26.2491	9.53851		25.688	5.64953		26.2491	15.579		25.688	9.59938
26.2634	9.77388		25.701	5.89333		26.2634	15.2393		25.701	7.13702
26.2777	9.64269		25.714	5.8542		26.2777	15.9146		25.714	8.04598
26.292	9.46905		25.727	6.52841		26.292	16.1301		25.727	8.28644
26.3063	9.81247		25.74	5.90838		26.3063	15.4755		25.74	7.68528
26.3206	9.58481		25.753	6.17024		26.3206	15.4092		25.753	8.64233
26.3349	9.3533		25.766	6.15519		26.3349	15.144		25.766	8.24316
26.3492	9.83176		25.779	5.3365		26.3492	15.6909		25.779	9.32044
26.3635	9.9128		25.792	6.29063		26.3635	15.6785		25.792	8.41629
26.3778	9.8935		25.805	6.02275		26.3778	15.9022		25.805	8.89242
26.3921	9.7353		25.818	5.52011		26.3921	15.5873		25.818	8.94532
26.4064	9.21824		25.831	5.53817		26.4064	15.231		25.831	8.15178
26.4207	9.20667		25.844	6.37491		26.4207	15.5832		25.844	8.03636
26.435	9.28384		25.857	6.26956		26.435	15.3967		25.857	7.44
26.4493	9.34172		25.87	6.54346		26.4493	15.5045		25.87	8.94051
26.4636	9.52693		25.883	5.83313		26.4636	15.9271		25.883	8.63752
26.4779	9.64269		25.896	6.00169		26.4779	15.8111		25.896	7.5939
26.4922	9.43433		25.909	6.18529		26.4922	15.7738		25.909	7.71894
26.5065	9.45362		25.922	5.5502		26.5065	15.1481		25.922	7.52657
26.5208	9.68128		25.935	5.53215		26.5208	15.0818		25.935	7.37267
26.5351	9.41503		25.948	6.46521		26.5351	14.8871		25.948	8.6279
26.5494	9.48063		25.961	6.20034		26.5494	15.434		25.961	8.63271
26.5637	9.52693		25.974	5.62244		26.5637	15.7406		25.974	7.98827
26.578	9.70829		25.987	5.794		26.578	15.9436		25.987	7.68528
26.5923	9.72758		26	6.36889		26.5923	16.0762		26	7.72856
26.6066	9.72758		26.013	5.82109		26.6066	16.0762		26.013	7.14664
26.6209	9.16036		26.026	5.49001		26.6209	15.6578		26.026	7.8488
26.6352	9.58867		26.039	5.73983		26.6352	15.2351		26.039	7.36786
26.6495	9.59639		26.052	5.3034		26.6495	15.231		26.052	7.40634
26.6638	9.16422		26.065	4.98736		26.6638	15.3222		26.065	7.53138
26.6781	9.3996		26.078	5.10173		26.6781	14.7752		26.078	7.88727
26.6924	9.12564		26.091	6.04984		26.6924	14.6965		26.091	7.87284
26.7067	8.98287		26.104	5.95353		26.7067	15.6039		26.104	7.72856
26.721	9.42661		26.117	5.38767		26.721	15.0818		26.117	7.73337
26.7353	9.76617		26.13	5.66157		26.7353	14.8332		26.13	7.8488
26.7496	9.11792		26.143	5.54418		26.7496	14.9119		26.143	7.92093
26.7639	8.94814		26.156	5.96858		26.7639	14.8747		26.156	8.6279
26.7782	9.22596		26.169	5.82711		26.7782	15.2393		26.169	8.48843
26.7925	9.49992		26.182	5.26728		26.7925	15.1564		26.182	8.35377
26.8068	9.71601		26.195	5.3365		26.8068	14.7214		26.195	7.93536
26.8211	9.36101		26.208	5.3034		26.8211	15.0694		26.208	7.25244
26.8354	9.43433		26.221	5.29738		26.8354	15.0694		26.221	7.60352
26.8497	9.31857		26.234	5.46593		26.8497	15.1233		26.234	8.5221
26.864	9.33014		26.247	5.92945		26.864	15.1067		26.247	8.25278
26.8783	9.26455		26.26	5.77294		26.8783	15.1647		26.26	8.0604
26.8926	8.7938		26.273	5.66458		26.8926	15.2517		26.273	8.45958
26.9069	9.26455		26.286	5.08367		26.9069	15.2227		26.286	8.32973
26.9212	9.18352		26.299	5.43282		26.9212	15.5749		26.299	7.24763
26.9355	9.3533		26.312	5.77294		26.9355	15.2269		26.312	7.64199
26.9498	9.48835		26.325	5.40272		26.9498	14.7006		26.325	7.9017
26.9641	9.04075		26.338	5.27631		26.9641	15.2269		26.338	7.19954
26.9784	9.19509		26.351	5.80905		26.9784	15.5003		26.351	7.6468
26.9927	9.11792		26.364	5.84818		26.9927	15.3139		26.364	8.5221
27.007	9.10248		26.377	5.64953		27.007	15.1067		26.377	7.98346
27.0213	9.3533		26.39	5.44486		27.0213	14.9575		26.39	7.98346
27.0356	9.30313		26.403	5.52613		27.0356	15.086		26.403	8.05079
27.0499	9.3533		26.416	5.58933		27.0499	15.2724		26.416	7.8488
27.0642	9.45748		26.429	5.41777		27.0642	15.2973		26.429	7.31496
27.0785	9.14107		26.442	5.46292		27.0785	15.0694		26.442	7.57947
27.0928	9.32243		26.455	5.46292		27.0928	15.4465		26.455	8.0604
27.1071	9.36487		26.468	5.92644		27.1071	15.3719		26.468	8.1085
27.1214	9.36487		26.481	6.1582		27.1214	15.3719		26.481	8.11331
27.1357	9.21824		26.494	5.60137		27.1357	14.6095		26.494	7.63719
27.15	9.04075		26.507	5.76692		27.15	14.8664		26.507	8.11812
27.1643	9.34172		26.52	5.96858		27.1643	14.4728		26.52	8.04598
27.1786	9.00602		26.533	5.62545		27.1786	14.336		26.533	7.9546
27.1929	8.77836		26.546	5.77294		27.1929	14.5763		26.546	7.93536
27.2072	8.77064		26.559	5.83012		27.2072	14.999		26.559	7.31977
27.2215	9.37259		26.572	5.65254		27.2215	14.8829		26.572	7.35344
27.2358	9.07162		26.585	5.42078		27.2358	15.1647		26.585	6.83884
27.2501	8.71276		26.598	5.24019		27.2501	14.9037		26.598	7.16587
27.2644	8.83624		26.611	5.39971		27.2644	14.7338		26.611	7.64199
27.2787	8.97515		26.624	5.59234		27.2787	14.6095		26.624	7.82475
27.293	8.56228		26.637	5.83614		27.293	15.0404		26.637	7.75261
27.3073	8.98287		26.65	5.70973		27.3073	14.6385		26.65	7.93055
27.3216	9.27612		26.663	5.73983		27.3216	14.5805		26.663	8.51248
27.3359	8.98673		26.676	5.49904		27.3359	14.5059		26.676	8.00269
27.3502	9.02145		26.689	4.90007		27.3502	14.5971		26.689	7.68047
27.3645	8.89798		26.702	5.38466		27.3645	14.8332		26.702	7.58428
27.3788	9.23754		26.715	6.00771		27.3788	14.8622		26.715	8.58462
27.3931	9.05618		26.728	6.10703		27.3931	14.9285		26.728	8.36339
27.4074	9.15651		26.741	5.91139		27.4074	14.4852		26.741	8.2624
27.4217	9.53079		26.754	5.82109		27.4217	14.9244		26.754	8.44515
27.436	9.3533		26.767	5.50506		27.436	15.173		26.767	8.42591
27.4503	9.30699		26.78	6.02275		27.4503	15.1026		26.78	7.82475
27.4646	8.89026		26.793	5.56224		27.4646	14.8249		26.793	7.56986
27.4789	9.1758		26.806	5.80604		27.4789	14.7172		26.806	6.42524
27.4932	9.81247		26.819	5.6706		27.4932	15.1564		26.819	8.11331
27.5075	9.36487		26.832	5.65856		27.5075	14.9078		26.832	8.06521
27.5218	9.23754		26.845	5.64652		27.5218	15.0901		26.845	8.40668
27.5361	9.46134		26.858	4.80075		27.5361	15.5956		26.858	7.08892
27.5504	9.27998		26.871	5.62244		27.5504	14.9492		26.871	7.58428
27.5647	9.32243		26.884	5.41777		27.5647	15.347		26.884	7.56505
27.579	9.27226		26.897	5.40874		27.579	14.9285		26.897	7.9017
27.5933	9.72372		26.91	6.23947		27.5933	15.1937		26.91	8.07964
27.6076	9.58095		26.923	6.60968		27.6076	15.2517		26.923	8.56057
27.6219	9.58095		26.936	6.19131		27.6219	15.2517		26.936	7.98346
27.6362	9.48063		26.949	5.17698		27.6362	15.0777		26.949	8.32492
27.6505	9.31857		26.962	5.87527		27.6505	15.0445		26.962	8.33454
27.6648	9.41503		26.975	5.93246		27.6648	14.7959		26.975	7.99307
27.6791	9.57324		26.988	5.93547		27.6791	14.8374		26.988	7.8007
27.6934	9.15265		27.001	5.64351		27.6934	14.7296		27.001	9.29159
27.7077	9.1758		27.014	5.18902		27.7077	14.6261		27.014	7.66604
27.722	9.38802		27.027	6.59463		27.722	14.7131		27.027	7.90651
27.7363	9.51922		27.04	5.63749		27.7363	14.9244		27.04	7.44481
27.7506	9.4459		27.053	5.77294		27.7506	14.9658		27.053	8.17583
27.7649	9.61182		27.066	4.87298		27.7649	14.8581		27.066	6.96869
27.7792	9.48835		27.079	6.96785		27.7792	15.2973		27.079	8.48843
27.7935	9.55394		27.092	5.98664		27.7935	14.6178		27.092	6.93503
27.8078	9.15651		27.105	5.48098		27.8078	15.1937		27.105	8.12293
27.8221	9.334		27.118	5.44787		27.8221	15.057		27.118	7.36786
27.8364	9.65813		27.131	6.50734		27.8364	15.5542		27.131	7.92093
27.8507	9.2414		27.144	5.74585		27.8507	15.5666		27.144	8.68081
27.865	9.4459		27.157	5.42981		27.865	15.2393		27.157	6.68013
27.8793	9.67356		27.17	5.67361		27.8793	14.9907		27.17	7.45443
27.8936	9.58867		27.183	5.9144		27.8936	15.2724		27.183	8.04117
27.9079	9.5771		27.196	6.68192		27.9079	15.173		27.196	8.65676
27.9222	9.69285		27.209	5.30641		27.9222	15.3056		27.209	8.48362
27.9365	10.1134		27.222	5.77895		27.9365	15.1647		27.222	7.94017
27.9508	9.86649		27.235	5.37864		27.9508	15.4506		27.235	7.45443
27.9651	9.80475		27.248	5.24621		27.9651	15.6992		27.248	6.97831
27.9794	10.2562		27.261	6.16121		27.9794	15.4755		27.261	8.1085
27.9937	9.93981		27.274	5.55923		27.9937	15.5376		27.274	7.56505
28.008	10.6807		27.287	5.96256		28.008	15.8069		27.287	7.82475
28.0223	10.4646		27.3	5.25825		28.0223	16.416		27.3	7.96903
28.0366	10.4607		27.313	5.64652		28.0366	16.0348		27.313	7.49772
28.0509	10.8003		27.326	6.07392		28.0509	16.242		27.326	8.36339
28.0652	11.3791		27.339	5.84517		28.0652	15.8028		27.339	7.89208
28.0795	10.7655		27.352	5.95052		28.0795	17.0002		27.352	8.09407
28.0938	11.4099		27.365	5.55622		28.0938	17.2902		27.365	7.67566
28.1081	11.7495		27.378	5.42379		28.1081	17.6631		27.378	7.8536
28.1224	12.0852		27.391	5.69769		28.1224	17.7502		27.391	7.85841
28.1367	12.0852		27.404	5.59535		28.1367	17.7502		27.404	7.65642
28.151	12.7257		27.417	6.26956		28.151	18.8233		27.417	7.52657
28.1653	13.0537		27.43	6.70299		28.1653	18.9062		27.43	9.1954
28.1796	14.0608		27.443	5.99567		28.1796	19.8177		27.443	8.6279
28.1939	14.3309		27.456	6.07091		28.1939	20.2817		27.456	8.22392
28.2082	14.7785		27.469	5.87527		28.2082	20.982		27.469	8.74333
28.2225	15.8011		27.482	6.23947		28.2225	21.3383		27.482	9.32044
28.2368	17.1979		27.495	6.23044		28.2368	23.4017		27.495	9.10403
28.2511	18.0506		27.508	6.51336		28.2511	24.6654		27.508	8.87799
28.2654	19.7098		27.521	6.47725		28.2654	26.8241		27.521	9.04631
28.2797	20.5047		27.534	6.402		28.2797	28.1334		27.534	9.17136
28.294	23.1633		27.547	6.41103		28.294	30.7023		27.547	9.12326
28.3083	25.0926		27.56	6.25451		28.3083	33.5612		27.56	8.68562
28.3226	27.9557		27.573	6.01673		28.3226	36.5942		27.573	8.43553
28.3369	31.1545		27.586	6.36588		28.3369	40.7831		27.586	8.50767
28.3512	34.9668		27.599	6.88358		28.3512	43.9776		27.599	8.68081
28.3655	38.7984		27.612	6.91368		28.3655	49.9772		27.612	9.42625
28.3798	45.2423		27.625	6.45317		28.3798	54.4893		27.625	8.96456
28.3941	50.4978		27.638	6.0047		28.3941	61.6242		27.638	9.13288
28.4084	56.8606		27.651	6.37491		28.4084	70.1388		27.651	9.49839
28.4227	63.9296		27.664	6.86251		28.4227	77.7667		27.664	9.73405
28.437	71.4192		27.677	6.80231		28.437	83.9238		27.677	10.2198
28.4513	79.202		27.69	6.48327		28.4513	91.9577		27.69	9.25311
28.4656	88.5939		27.703	6.54948		28.4656	97.0251		27.703	9.17617
28.4799	95.6783		27.716	7.36516		28.4799	100		27.716	10.441
28.4942	100		27.729	6.99193		28.4942	99.7473		27.729	9.96489
28.5085	97.7273		27.742	6.44715		28.5085	94.4272		27.742	9.38297
28.5228	92.1824		27.755	6.48627		28.5228	88.7756		27.755	9.23388
28.5371	82.4973		27.768	6.29063		28.5371	81.7734		27.768	8.84913
28.5514	74.4907		27.781	6.81435		28.5514	73.4991		27.781	9.79657
28.5657	66.7657		27.794	7.2568		28.5657	65.1916		27.794	9.96008
28.58	58.0954		27.807	6.91669		28.58	57.0168		27.807	9.41663
28.5943	48.9697		27.82	7.04009		28.5943	48.7466		27.82	9.66191
28.6086	40.5772		27.833	7.41332		28.6086	42.2788		27.833	9.55129
28.6229	33.5198		27.846	6.98591		28.6229	37.0706		27.846	9.92161
28.6372	26.7132		27.859	6.81435		28.6372	31.0752		27.859	9.89275
28.6515	26.7132		27.872	7.00096		28.6515	31.0752		27.872	9.63305
28.6658	19.3163		27.885	6.97688		28.6658	24.798		27.885	10.2631
28.6801	17.0435		27.898	7.12738		28.6801	23.6047		27.898	10.7584
28.6944	15.1991		27.911	7.72333		28.6944	22.0054		27.911	10.0659
28.7087	13.7868		27.924	7.84674		28.7087	20.1906		27.924	9.57534
28.723	12.7412		27.937	7.63304		28.723	19.7307		27.937	10.2535
28.7373	12.2511		27.95	7.51264		28.7373	18.8854		27.95	10.7392
28.7516	11.7302		27.963	7.71129		28.7516	18.6368		27.963	11.4317
28.7659	11.5952		27.976	8.40657		28.7659	17.8745		27.976	11.7492
28.7802	11.5141		27.989	8.54503		28.7802	17.3773		27.989	10.9797
28.7945	10.916		28.002	8.15675		28.7945	16.5527		28.002	9.1954
28.8088	10.8466		28.015	8.07549		28.8088	16.764		28.015	9.75809
28.8231	10.3257		28.028	8.19287		28.8231	16.387		28.028	11.1095
28.8374	10.4221		28.041	8.77077		28.8374	16.2295		28.041	12.3696
28.8517	9.64655		28.054	8.55105		28.8517	15.9768		28.054	11.9848
28.866	9.49221		28.067	9.34866		28.866	15.4299		28.067	11.9415
28.8803	9.65813		28.08	9.85733		28.8803	16.0224		28.08	12.4128
28.8946	9.30313		28.093	9.45702		28.8946	15.4423		28.093	13.2737
28.9089	9.41503		28.106	9.55033		28.9089	15.0073		28.106	13.7979
28.9232	9.5115		28.119	9.70985		28.9232	14.8374		28.119	15.0002
28.9375	9.41889		28.132	9.51421		28.9375	14.7918		28.132	13.7931
28.9518	9.3996		28.145	10.0078		28.9518	14.9782		28.145	16.1881
28.9661	9.5578		28.158	10.8957		28.9661	14.9327		28.158	15.8274
28.9804	9.0176		28.171	10.676		28.9804	14.568		28.171	15.3513
28.9947	8.82466		28.184	11.9642		28.9947	14.4396		28.184	15.2311
29.009	9.27612		28.197	11.9883		29.009	14.3692		28.197	16.7172
29.0233	9.31471		28.21	12.7077		29.0233	14.4728		28.21	17.7416
29.0376	8.64331		28.223	13.8153		29.0376	13.9756		28.223	18.6553
29.0519	8.7282		28.236	13.5685		29.0519	14.5225		28.236	19.6076
29.0662	8.58543		28.249	15.4106		29.0662	14.7379		28.249	20.6704
29.0805	9.08705		28.262	15.0825		29.0805	13.6814		28.262	22.1757
29.0948	8.7745		28.275	17.3579		29.0948	14.2573		28.275	21.512
29.1091	8.86711		28.288	16.7289		29.1091	14.0791		28.288	25.5519
29.1234	8.9057		28.301	19.1759		29.1234	13.5737		28.301	27.2015
29.1377	9.03303		28.314	21.2828		29.1377	14.1123		28.314	28.8559
29.152	8.60086		28.327	22.5469		29.152	14.249		28.327	32.5735
29.1663	8.60086		28.34	24.091		29.1663	14.249		28.34	33.67
29.1806	8.6163		28.353	27.0407		29.1806	13.3209		28.353	36.4161
29.1949	8.42723		28.366	28.7082		29.1949	13.8347		28.366	39.8019
29.2092	8.45038		28.379	31.2515		29.2092	13.5861		28.379	42.0382
29.2235	8.27674		28.392	36.5579		29.2235	13.6027		28.392	46.2559
29.2378	8.19571		28.405	39.8808		29.2378	13.4038		28.405	52.2003
29.2521	8.18413		28.418	47.3032		29.2521	13.5115		28.418	56.293
29.2664	8.57385		28.431	48.7659		29.2664	13.2753		28.431	59.6306
29.2807	8.33076		28.444	56.1221		29.2807	13.6648		28.444	62.8721
29.295	8.38478		28.457	61.7415		29.295	13.7145		28.457	69.7254
29.3093	8.44266		28.47	67.5175		29.3093	13.3706		28.47	78.2379
29.3236	8.46967		28.483	72.3874		29.3236	13.4286		28.483	77.9974
29.3379	8.48125		28.496	77.6367		29.3379	13.3913		28.496	88.299
29.3522	7.91403		28.509	82.7173		29.3522	13.4121		28.509	88.044
29.3665	7.95262		28.522	89.9591		29.3665	13.5032		28.522	94.7386
29.3808	8.33462		28.535	93.9742		29.3808	13.6151		28.535	98.5909
29.3951	8.11854		28.548	95.9186		29.3951	13.3168		28.548	99.2738
29.4094	8.22272		28.561	96.1323		29.4094	13.2422		28.561	99.1007
29.4237	7.80213		28.574	98.4018		29.4237	13.1013		28.574	100
29.438	8.3462		28.587	100		29.438	13.7104		28.587	99.2161
29.4523	8.18027		28.6	96.9028		29.4523	13.4742		28.6	93.4786
29.4666	7.99892		28.613	96.346		29.4666	13.0267		28.613	93.7094
29.4809	8.36549		28.626	88.7762		29.4809	13.2878		28.626	86.8561
29.4952	8.42337		28.639	83.0123		29.4952	13.4369		28.639	86.7696
29.5095	7.9912		28.652	77.9376		29.5095	13.6524		28.652	80.2241
29.5238	8.1031		28.665	71.7554		29.5238	13.4245		28.665	74.0682
29.5381	8.2806		28.678	65.9162		29.5381	13.4576		28.678	68.9751
29.5524	8.11468		28.691	60.673		29.5524	13.1054		28.691	65.3104
29.5667	8.23044		28.704	55.3154		29.5667	13.6192		28.704	58.4716
29.581	8.15326		28.717	47.7245		29.581	13.035		28.717	54.124
29.5953	8.15326		28.73	44.0495		29.5953	13.1262		28.73	48.7905
29.6096	8.28446		28.743	41.3376		29.6096	13.2587		28.743	47.0735
29.6239	8.05294		28.756	37.6114		29.6239	12.9107		28.756	43.3415
29.6382	7.7867		28.769	33.1086		29.6382	13.7767		28.769	39.3786
29.6525	8.00664		28.782	29.5299		29.6525	13.7601		28.782	34.1413
29.6668	8.24201		28.795	26.9022		29.6668	13.1137		28.795	32.939
29.6811	8.29989		28.808	24.4883		29.6811	12.9811		28.808	30.592
29.6954	8.00664		28.821	23.1489		29.6954	12.832		28.821	27.567
29.7097	7.88702		28.834	20.6959		29.7097	12.6331		28.834	25.9414
29.724	7.99506		28.847	18.5709		29.724	13.1013		28.847	24.2726
29.7383	7.70566		28.86	17.9689		29.7383	12.9563		28.86	22.0363
29.7526	7.9912		28.873	17.6649		29.7526	12.7698		28.873	22.2334
29.7669	7.97191		28.886	16.2142		29.7669	12.7284		28.886	19.6412
29.7812	7.95647		28.899	14.5076		29.7812	12.9107		28.899	19.5931
29.7955	7.91789		28.912	13.1742		29.7955	13.1925		28.912	19.2661
29.8098	7.91017		28.925	13.3969		29.8098	12.6538		28.925	18.0109
29.8241	8.08381		28.938	13.2525		29.8241	12.9314		28.938	16.8855
29.8384	8.16098		28.951	12.3916		29.8384	12.9604		28.951	15.7409
29.8527	7.99506		28.964	11.3743		29.8527	13.4618		28.964	15.0628
29.867	8.07609		28.977	10.8837		29.867	12.7201		28.977	14.2067
29.8813	8.14555		28.99	10.6098		29.8813	13.1427		28.99	13.2497
29.8956	7.74039		29.003	10.0861		29.8956	13.0226		29.003	13.418
29.9099	8.07223		29.016	9.84228		29.9099	13.0226		29.016	13.2833
29.9242	7.80985		29.029	9.47809		29.9242	12.6455		29.029	11.9559
29.9385	7.77512		29.042	9.38478		29.9385	12.9273		29.042	11.5568
29.9528	7.80213		29.055	9.14399		29.9528	12.6497		29.055	11.6578
29.9671	7.97963		29.068	8.26511		29.9671	12.7947		29.068	11.4942
29.9814	7.70566		29.081	8.38249		29.9814	12.6828		29.081	12.3647
29.9957	7.69409		29.094	8.99952		29.9957	12.9811		29.094	12.4657
30.01	7.57061		29.107	8.76174		30.01	12.8444		29.107	11.7299
30.0243	7.73653		29.12	8.34638		30.0243	12.7823		29.12	11.5904
30.0386	8.13011		29.133	8.16277		30.0386	12.6331		29.133	11.172
30.0529	8.19571		29.146	7.87082		30.0529	12.9604		29.146	10.8258
30.0672	7.95647		29.159	8.11462		30.0672	12.7988		29.159	10.97
30.0815	7.82914		29.172	8.16277		30.0815	12.832		29.172	11.2538
30.0958	7.84843		29.185	7.58488		30.0958	12.7201		29.185	11.1528
30.1101	7.70952		29.198	8.05442		30.1101	12.7491		29.198	10.9171
30.1244	7.7674		29.211	7.97917		30.1244	12.7077		29.211	10.4073
30.1387	8.33076		29.224	7.91897		30.1387	13.267		29.224	10.8017
30.153	7.95647		29.237	7.70828		30.153	13.2422		29.237	9.99856
30.1673	8.02207		29.25	7.01601		30.1673	13.2878		29.25	8.98379
30.1816	8.02207		29.263	6.7391		30.1816	13.2878		29.263	9.18578
30.1959	7.6092		29.276	7.05514		30.1959	12.4094		29.276	9.87352
30.2102	7.97577		29.289	7.12437		30.2102	12.5171		29.289	9.9697
30.2245	7.63235		29.302	7.36215		30.2245	11.9867		29.302	9.90718
30.2388	7.79441		29.315	7.42235		30.2388	12.8113		29.315	9.11845
30.2531	7.50887		29.328	6.51938		30.2531	12.2063		29.328	9.0415
30.2674	7.48958		29.341	7.08825		30.2674	12.2188		29.341	8.82989
30.2817	8.04908		29.354	7.10029		30.2817	12.2975		29.354	8.78661
30.296	7.42399		29.367	6.64279		30.296	12.4508		29.367	8.22392
30.3103	7.64393		29.38	6.81435		30.3103	12.3804		29.38	8.99822
30.3246	7.60148		29.393	6.04984		30.3246	12.5544		29.393	8.7289
30.3389	7.57833		29.406	6.28762		30.3389	12.4674		29.406	9.25311
30.3532	7.53589		29.419	6.35986		30.3532	12.0903		29.419	9.609
30.3675	7.42013		29.432	6.08897		30.3675	12.2229		29.432	8.91165
30.3818	7.62463		29.445	6.42909		30.3818	12.4674		29.445	8.37301
30.3961	7.72496		29.458	6.2485		30.3961	12.4135		29.458	8.76256
30.4104	7.23877		29.471	6.01072		30.4104	12.629		29.471	8.80104
30.4247	7.53589		29.484	7.15146		30.4247	11.7837		29.484	8.65195
30.439	7.73653		29.497	6.66085		30.439	11.9743		29.497	8.1085
30.4533	7.82142		29.51	6.57657		30.4533	12.2188		29.51	8.65195
30.4676	7.80985		29.523	6.58861		30.4676	12.1235		29.523	8.49805
30.4819	7.77126		29.536	6.13412		30.4819	12.1815		29.536	9.28678
30.4962	7.55132		29.549	5.60438		30.4962	12.2063		29.549	9.32044
30.5105	7.60148		29.562	6.13111		30.5105	12.2519		29.562	7.50252
30.5248	7.76354		29.575	6.66085		30.5248	12.2975		29.575	8.59905
30.5391	7.50502		29.588	6.17325		30.5391	12.1359		29.588	8.82028
30.5534	7.55518		29.601	5.44787		30.5534	12.5088		29.601	8.19507
30.5677	7.55904		29.614	5.99567		30.5677	11.9619		29.614	8.80585
30.582	7.58991		29.627	5.45088		30.582	12.4218		29.627	8.29125
30.5963	7.70181		29.64	6.2515		30.5963	12.0448		29.64	7.89208
30.6106	7.51273		29.653	5.71575		30.6106	11.9743		29.653	7.97865
30.6249	7.66708		29.666	6.71202		30.6249	12.4177		29.666	7.96903
30.6392	7.57833		29.679	6.03479		30.6392	12.5088		29.679	8.69042
30.6535	7.62077		29.692	5.55923		30.6535	12.5668		29.692	8.20468
30.6678	7.45871		29.705	6.46822		30.6678	12.0157		29.705	7.41596
30.6821	7.40469		29.718	6.11004		30.6821	12.3721		29.718	8.22392
30.6964	7.40469		29.731	5.57127		30.6964	12.3721		29.731	8.60386
30.7107	7.29665		29.744	6.04081		30.7107	12.1525		29.744	7.23801
30.725	7.51659		29.757	5.55321		30.725	12.3348		29.757	7.30534
30.7393	7.66708		29.77	5.68264		30.7393	12.1898		29.77	7.91132
30.7536	7.1153		29.783	6.20335		30.7536	12.0903		29.783	8.39225
30.7679	7.21948		29.796	6.11606		30.7679	12.1318		29.796	9.00784
30.7822	7.19633		29.809	6.16723		30.7822	11.9205		29.809	8.7289
30.7965	7.67094		29.822	5.78196		30.7965	12.1939		29.822	7.10816
30.8108	7.25421		29.835	5.86022		30.8108	11.7091		29.835	8.11331
30.8251	7.37382		29.848	6.03178		30.8251	11.8956		29.848	7.26687
30.8394	7.31209		29.861	5.67361		30.8394	11.8293		29.861	7.5939
30.8537	7.30051		29.874	5.49603		30.8537	12.0986		29.874	6.67051
30.868	7.35839		29.887	5.34553		30.868	11.9329		29.887	8.01231
30.8823	7.04198		29.9	5.92343		30.8823	11.7962		29.9	8.51248
30.8966	7.36996		29.913	5.50506		30.8966	12.2478		29.913	8.1085
30.9109	6.93394		29.926	5.74886		30.9109	11.6636		29.926	8.68081
30.9252	7.15388		29.939	5.98363		30.9252	11.9412		29.939	8.28163
30.9395	7.50116		29.952	5.72177		30.9395	11.7754		29.952	8.81066
30.9538	7.64779		29.965	5.63448		30.9538	11.7091		29.965	8.86837
30.9681	7.32366		29.978	5.62846		30.9681	11.908		29.978	7.45924
30.9824	7.096		29.991	5.9144		30.9824	12.0199		29.991	8.45477
30.9967	7.30437		30.004	5.80002		30.9967	11.2741		30.004	7.78146
31.011	7.35453		30.017	5.74886		31.011	12.082		30.017	7.87284
31.0253	7.451		30.03	5.77294		31.0253	11.5558		30.03	8.53653
31.0396	7.00725		30.043	5.86925		31.0396	11.5558		30.043	7.00236
31.0539	7.62077		30.056	5.69769		31.0539	12.1028		30.056	7.01678
31.0682	7.17703		30.069	5.25223		31.0682	12.1566		30.069	7.35344
31.0825	7.12687		30.082	5.61943		31.0825	11.5973		30.082	7.82475
31.0968	7.17703		30.095	5.74585		31.0968	11.9867		30.095	7.36305
31.1111	7.33524		30.108	5.99567		31.1111	11.6594		30.108	7.82956
31.1254	7.10758		30.121	5.79701		31.1254	11.9453		30.121	8.02674
31.1397	7.13459		30.134	5.96858		31.1397	11.7133		30.134	8.05079
31.154	7.48958		30.147	5.82711		31.154	11.531		30.147	7.94979
31.1683	7.30823		30.16	5.46894		31.1683	11.8417		30.16	7.66123
31.1826	7.01111		30.173	5.53516		31.1826	11.9909		30.173	7.51695
31.1969	7.01111		30.186	5.68565		31.1969	11.9909		30.186	8.03155
31.2112	6.94552		30.199	5.24019		31.2112	11.4564		30.199	7.86322
31.2255	7.48186		30.212	5.47496		31.2255	11.2409		30.212	6.99755
31.2398	7.18089		30.225	5.59535		31.2398	11.821		30.225	7.17068
31.2541	7.15388		30.238	5.56826		31.2541	11.5848		30.238	7.12259
31.2684	7.3391		30.251	5.53817		31.2684	11.3155		30.251	6.42043
31.2827	7.09986		30.264	5.30039		31.2827	11.1871		30.264	6.58395
31.297	7.20019		30.277	5.49001		31.297	11.1995		30.277	7.39672
31.3113	7.01497		30.29	5.51409		31.3113	10.8722		30.29	7.06488
31.3256	6.99182		30.303	5.00542		31.3256	11.3445		30.303	7.26206
31.3399	7.30051		30.316	5.03853		31.3399	11.7464		30.316	7.39191
31.3542	7.32752		30.329	5.39369		31.3542	11.415		30.329	7.25244
31.3685	7.33138		30.342	5.57428		31.3685	11.8666		30.342	7.19954
31.3828	7.26192		30.355	5.70371		31.3828	11.7091		30.355	6.94945
31.3971	7.35453		30.368	5.53516		31.3971	11.531		30.368	7.17068
31.4114	7.06127		30.381	5.6104		31.4114	11.1954		30.381	7.14183
31.4257	7.08443		30.394	5.8843		31.4257	11.4274		30.394	6.99274
31.44	7.18089		30.407	5.46894		31.44	11.6346		30.407	6.75227
31.4543	6.93394		30.42	5.08367		31.4543	11.4564		30.42	7.02159
31.4686	6.99182		30.433	5.42078		31.4686	11.5973		30.433	7.5939
31.4829	7.14231		30.446	5.21009		31.4829	11.821		30.446	6.94945
31.4972	7.13073		30.459	4.68938		31.4972	11.4854		30.459	6.63204
31.5115	6.90307		30.472	4.87599		31.5115	11.1954		30.472	7.31015
31.5258	6.8915		30.485	5.1529		31.5258	11.1166		30.485	7.34863
31.5401	7.12301		30.498	5.66157		31.5401	11.705		30.498	6.80517
31.5544	7.08057		30.511	5.81507		31.5544	11.444		30.511	6.79556
31.5687	6.98024		30.524	5.62846		31.5687	11.4481		30.524	6.67051
31.583	7.07671		30.537	5.39971		31.583	11.4274		30.537	7.26206
31.5973	7.15388		30.55	5.30641		31.5973	11.7381		30.55	7.3871
31.6116	6.91465		30.563	5.12882		31.6116	11.7009		30.563	7.51214
31.6259	7.12301		30.576	5.41777		31.6259	11.6801		30.576	7.17549
31.6402	7.05742		30.589	5.66458		31.6402	11.1249		30.589	6.82922
31.6545	6.82976		30.602	5.20708		31.6545	11.3197		30.602	7.25244
31.6688	7.10758		30.615	5.10775		31.6688	11.6346		30.615	7.80551
31.6831	7.20019		30.628	4.88502		31.6831	11.2616		30.628	7.16106
31.6974	7.20019		30.641	5.23417		31.6974	11.4025		30.641	7.31977
31.7117	7.20019		30.654	4.90007		31.7117	11.4025		30.654	7.56505
31.726	6.94937		30.667	5.35155		31.726	11.0876		30.667	7.49291
31.7403	6.90693		30.68	5.05659		31.7403	11.3238		30.68	6.60318
31.7546	6.92622		30.693	4.22586		31.7546	11.1871		30.693	6.69937
31.7689	6.9841		30.706	4.86696		31.7689	11.5185		30.706	6.90136
31.7832	6.72172		30.719	5.28835		31.7832	11.2161		30.719	7.05526
31.7975	7.07285		30.732	5.03552		31.7975	11.3197		30.732	7.1803
31.8118	6.85677		30.745	5.20708		31.8118	10.7934		30.745	6.89174
31.8261	7.14231		30.758	5.07163		31.8261	11.0503		30.758	7.38229
31.8404	6.87992		30.771	5.29136		31.8404	11.3652		30.771	7.17549
31.8547	6.9378		30.784	4.94823		31.8547	11.0255		30.784	7.42558
31.869	6.86449		30.797	4.68637		31.869	11.3942		30.797	7.37267
31.8833	6.92622		30.81	5.02649		31.8833	11.1995		30.81	6.88693
31.8976	7.19633		30.823	4.98134		31.8976	11.6263		30.823	7.19954
31.9119	6.92236		30.836	5.43884		31.9119	11.2451		30.836	6.3002
31.9262	7.18089		30.849	4.89706		31.9262	11.3487		30.849	7.46405
31.9405	7.11144		30.862	4.96328		31.9405	11.5475		30.862	7.63238
31.9548	7.06899		30.875	4.68336		31.9548	11.0669		30.875	6.4589
31.9691	6.9841		30.888	5.65856		31.9691	11.0918		30.888	7.98346
31.9834	6.94937		30.901	5.15892		31.9834	11.6304		30.901	7.87284
31.9977	7.01111		30.914	5.06863		31.9977	11.3984		30.914	6.82922
32.012	6.99954		30.927	5.75789		32.012	11.7257		30.927	6.41562
32.0263	6.94937		30.94	5.14086		32.0263	11.1871		30.94	7.18511
32.0406	7.096		30.953	4.64724		32.0406	11.0421		30.953	6.83403
32.0549	6.8722		30.966	4.87298		32.0549	11.4564		30.966	7.61314
32.0692	6.55194		30.979	5.40874		32.0692	10.9219		30.979	6.9206
32.0835	6.93008		30.992	5.19203		32.0835	11.0048		30.992	6.85327
32.0978	6.8259		31.005	5.64953		32.0978	11.1498		31.005	7.57466
32.1121	6.85291		31.018	5.20106		32.1121	11.3404		31.018	6.50219
32.1264	7.02655		31.031	4.45461		32.1264	11.0172		31.031	7.40634
32.1407	6.88764		31.044	5.46894		32.1407	11.2865		31.044	7.0264
32.155	6.98796		31.057	4.85793		32.155	11.2036		31.057	7.06969
32.1693	6.90307		31.07	4.61112		32.1693	11.3197		31.07	7.44481
32.1836	6.94552		31.083	5.47195		32.1836	11.3072		31.083	6.90136
32.1979	7.08057		31.096	5.50807		32.1979	11.2119		31.096	6.73784
32.2122	6.84519		31.109	4.88502		32.2122	11.2782		31.109	7.27649
32.2265	6.84519		31.122	4.90308		32.2265	11.2782		31.122	6.63685
32.2408	6.5365		31.135	5.09872		32.2408	10.9468		31.135	7.0745
32.2551	6.74487		31.148	4.92415		32.2551	11.0338		31.148	6.80998
32.2694	6.83747		31.161	4.85191		32.2694	11.3487		31.161	7.30053
32.2837	7.10372		31.174	4.63219		32.2837	10.5366		31.174	6.9735
32.298	7.04584		31.187	4.76463		32.298	10.4827		31.187	7.34863
32.3123	6.87992		31.2	5.17999		32.3123	11.1788		31.2	7.32458
32.3266	6.67541		31.213	4.66831		32.3266	11.1581		31.213	6.64647
32.3409	6.99954		31.226	5.13785		32.3409	11.2368		31.226	6.6657
32.3552	6.88378		31.239	5.56525		32.3552	10.7727		31.239	5.91545
32.3695	6.74101		31.252	4.50277		32.3695	10.9468		31.252	7.08892
32.3838	6.65998		31.265	4.4215		32.3838	11.0628		31.265	6.92541
32.3981	6.86063		31.278	5.60137		32.3981	11.0835		31.278	6.47814
32.4124	6.61753		31.291	5.1228		32.4124	10.8473		31.291	7.24282
32.4267	6.92622		31.304	5.14989		32.4267	11.2036		31.304	7.15145
32.441	6.85677		31.317	5.34854		32.441	10.7147		31.317	6.95907
32.4553	7.25035		31.33	5.34252		32.4553	10.7396		31.33	6.07416
32.4696	7.30437		31.343	5.83313		32.4696	10.8059		31.343	6.6609
32.4839	7.03426		31.356	5.21912		32.4839	11.3569		31.356	6.78113
32.4982	7.26964		31.369	5.10173		32.4982	11.1954		31.369	6.98312
32.5125	7.06127		31.382	5.45389		32.5125	11.2326		31.382	7.17549
32.5268	7.2079		31.395	4.7857		32.5268	11.3445		31.395	7.1803
32.5411	7.20019		31.408	4.7857		32.5411	10.9343		31.408	6.75708
32.5554	7.07671		31.421	5.22213		32.5554	11.4108		31.421	6.85808
32.5697	7.08443		31.434	5.46292		32.5697	11.2285		31.434	6.37234
32.584	7.32752		31.447	4.91211		32.584	11.3942		31.447	6.76189
32.5983	7.32366		31.46	4.85793		32.5983	11.2409		31.46	7.4881
32.6126	7.52431		31.473	4.76764		32.6126	11.1539		31.473	6.48295
32.6269	7.58219		31.486	5.15591		32.6269	11.4357		31.486	6.46371
32.6412	7.39312		31.499	5.36058		32.6412	11.8293		31.499	6.80998
32.6555	7.55518		31.512	5.00241		32.6555	11.8542		31.512	6.43486
32.6698	7.94876		31.525	4.77968		32.6698	11.7671		31.525	6.77151
32.6841	7.53203		31.538	4.68035		32.6841	11.5973		31.538	7.47367
32.6984	8.16484		31.551	5.21611		32.6984	12.3431		31.551	6.91098
32.7127	8.51983		31.564	5.65254		32.7127	12.0075		31.564	7.22358
32.727	8.51983		31.577	5.49603		32.727	12.0075		31.577	6.64166
32.7413	8.23044		31.59	5.30641		32.7413	12.5958		31.59	6.67532
32.7556	8.81695		31.603	5.50506		32.7556	13.0889		31.603	6.93022
32.7699	8.80923		31.616	5.25524		32.7699	12.948		31.616	6.02607
32.7842	9.38031		31.629	4.85793		32.7842	13.7642		31.629	6.15592
32.7985	9.86649		31.642	4.73453		32.7985	14.3692		31.642	6.89174
32.8128	10.1019		31.655	4.94823		32.8128	14.941		31.655	7.09373
32.8271	11.3173		31.668	5.00542		32.8271	15.9809		31.668	6.52623
32.8414	11.6878		31.681	4.98134		32.8414	16.7806		31.681	6.56952
32.8557	12.5367		31.694	5.08668		32.8557	17.1287		31.694	7.09373
32.87	13.729		31.707	4.9693		32.87	18.4421		31.707	6.85808
32.8843	14.6319		31.72	5.13484		32.8843	20.0373		31.72	6.89174
32.8986	16.2564		31.733	5.16494		32.8986	22.0841		31.733	6.7138
32.9129	18.0738		31.746	4.93318		32.9129	23.5509		31.746	6.36272
32.9272	19.4397		31.759	5.09872		32.9272	26.2606		31.759	6.93984
32.9415	21.5272		31.772	5.17698		32.9415	28.7964		31.772	7.73337
32.9558	24.4096		31.785	5.23417		32.9558	31.1208		31.785	7.09373
32.9701	26.5936		31.798	5.40272		32.9701	34.1164		31.798	5.80003
32.9844	29.6419		31.811	5.00542		32.9844	35.8898		31.811	6.16073
32.9987	32.5166		31.824	4.59908		32.9987	36.9256		31.824	6.69456
33.013	34.9051		31.837	4.74055		33.013	38.1272		31.837	6.78594
33.0273	34.1681		31.85	5.01746		33.0273	36.8303		31.85	6.98793
33.0416	32.9565		31.863	5.26126		33.0416	35.3636		31.863	6.43486
33.0559	32.0458		31.876	5.02649		33.0559	33.9175		31.876	6.02126
33.0702	28.8586		31.889	4.64122		33.0702	31.1208		31.889	6.68013
33.0845	26.3582		31.902	4.97532		33.0845	29.2604		31.902	6.2521
33.0988	23.7382		31.915	5.07163		33.0988	26.9236		31.915	6.1992
33.1131	22.4417		31.928	5.69468		33.1131	24.9845		31.928	6.74746
33.1274	19.679		31.941	5.56826		33.1274	22.4156		31.941	6.8196
33.1417	17.4525		31.954	4.98435		33.1417	20.3646		31.954	6.40119
33.156	14.9213		31.967	5.29437		33.156	18.3054		31.967	5.95874
33.1703	12.201		31.98	5.06562		33.1703	16.0969		31.98	6.60799
33.1846	10.6691		31.993	4.9994		33.1846	15.6619		31.993	6.71861
33.1989	9.97839		32.006	4.9091		33.1989	14.6136		32.006	6.80998
33.2132	9.34558		32.019	5.19504		33.2132	13.7601		32.019	7.29092
33.2275	8.87097		32.032	4.65326		33.2275	12.7698		32.032	6.33867
33.2418	8.87097		32.045	4.64423		33.2418	12.7698		32.045	6.34348
33.2561	8.42723		32.058	5.05358		33.2561	12.2602		32.058	6.81479
33.2704	7.7674		32.071	5.01144		33.2704	12.1608		32.071	7.82475
33.2847	7.47801		32.084	5.28534		33.2847	11.9785		32.084	7.30053
33.299	7.57833		32.097	5.27631		33.299	11.4812		32.097	7.55543
33.3133	7.09986		32.11	5.41175		33.3133	11.5931		32.11	7.18511
33.3276	7.29665		32.123	5.18601		33.3276	10.9509		32.123	7.45443
33.3419	7.32752		32.136	4.86997		33.3419	11.6304		32.136	8.28644
33.3562	7.04584		32.149	4.67734		33.3562	11.3238		32.149	7.49291
33.3705	6.98796		32.162	5.51409		33.3705	10.9343		32.162	6.96388
33.3848	6.72943		32.175	4.88803		33.3848	10.5407		32.175	7.50252
33.3991	7.03426		32.188	5.50205		33.3991	10.5449		32.188	7.40634
33.4134	6.91851		32.201	4.81279		33.4134	10.6484		32.201	6.85327
33.4277	6.6484		32.214	5.10474		33.4277	10.6816		32.214	8.18545
33.442	6.67927		32.227	5.82711		33.442	10.7727		32.227	7.34382
33.4563	6.64454		32.24	5.57428		33.4563	10.4786		32.24	7.12259
33.4706	6.69471		32.253	4.30412		33.4706	10.6484		32.253	6.0934
33.4849	6.72943		32.266	5.50807		33.4849	10.4786		32.266	7.18992
33.4992	6.71014		32.279	5.01746		33.4992	10.2341		32.279	6.77632
33.5135	6.4246		32.292	4.80978		33.5135	10.3501		32.292	6.63685
33.5278	6.52879		32.305	4.67132		33.5278	10.3833		32.305	6.67051
33.5421	6.53264		32.318	4.94522		33.5421	10.2755		32.318	7.86322
33.5564	6.60596		32.331	5.45088		33.5564	10.1927		32.331	6.406
33.5707	6.76416		32.344	5.68866		33.5707	10.2258		32.344	7.88246
33.585	6.0889		32.357	5.06562		33.585	10.5449		32.357	7.36305
33.5993	6.30499		32.37	4.82182		33.5993	10.1761		32.37	7.82956
33.6136	6.31656		32.383	5.31242		33.6136	10.2838		32.383	7.18511
33.6279	6.57895		32.396	5.27029		33.6279	10.4827		32.396	6.84365
33.6422	6.34357		32.409	5.03853		33.6422	10.2838		32.409	7.56024
33.6565	6.3783		32.422	4.9693		33.6565	10.0311		32.422	6.06454
33.6708	6.10048		32.435	5.91741		33.6708	10.2507		32.435	7.17068
33.6851	6.63297		32.448	5.52011		33.6851	9.96064		32.448	8.09888
33.6994	6.50563		32.461	5.06863		33.6994	9.96064		32.461	7.95941
33.7137	6.25096		32.474	4.80978		33.7137	10.0601		32.474	7.19954
33.728	6.43232		32.487	5.69468		33.728	9.86534		32.487	6.94464
33.7423	6.17379		32.5	6.10101		33.7423	10.4288		32.5	7.1803
33.7566	6.17379		32.513	5.51409		33.7566	10.4288		32.513	6.79556
33.7709	5.92684		32.526	5.57428		33.7709	9.66232		32.526	7.93055
33.7852	6.15836		32.539	5.39369		33.7852	9.98135		32.539	7.22839
33.7995	6.20466		32.552	5.20708		33.7995	9.66232		32.552	7.63238
33.8138	6.45161		32.565	5.75187		33.8138	9.84877		32.565	8.2624
33.8281	6.05418		32.578	5.62244		33.8281	9.54216		32.578	7.77666
33.8424	6.26254		32.591	5.22815		33.8424	9.82805		32.591	8.03636
33.8567	6.30499		32.604	5.62846		33.8567	9.79905		32.604	8.70485
33.871	6.3127		32.617	5.77294		33.871	9.84048		32.617	8.39225
33.8853	5.977		32.63	6.45919		33.8853	10.2258		32.63	8.45958
33.8996	6.19309		32.643	6.6759		33.8996	9.60845		32.643	7.73337
33.9139	5.95771		32.656	6.56754		33.9139	9.80733		32.656	8.23354
33.9282	6.34357		32.669	6.35083		33.9282	9.57945		32.669	9.14731
33.9425	6.06961		32.682	5.95654		33.9425	9.451		32.682	9.09441
33.9568	6.35515		32.695	6.56453		33.9568	9.67475		32.695	8.50286
33.9711	6.32814		32.708	6.59463		33.9711	9.56288		32.708	8.97898
33.9854	6.29341		32.721	6.60667		33.9854	9.7369		32.721	8.82509
33.9997	6.15836		32.734	6.82037		33.9997	9.98964		32.734	8.62309
34.014	6.52879		32.747	6.85047		34.014	9.74518		32.747	9.40701
34.0283	6.2664		32.76	7.63003		34.0283	9.76176		32.76	9.7629
34.0426	6.13135		32.773	7.76547		34.0426	9.72032		32.773	9.57053
34.0569	6.10048		32.786	7.64508		34.0569	9.65817		32.786	9.25311
34.0712	6.25096		32.799	7.78353		34.0712	9.36814		32.799	10.1717
34.0855	6.25868		32.812	7.93402		34.0855	9.76176		32.812	10.9412
34.0998	6.4439		32.825	8.52697		34.0998	9.59188		32.825	10.8498
34.1141	6.06961		32.838	8.51192		34.1141	9.66232		32.838	12.5763
34.1284	6.30499		32.851	9.07778		34.1284	9.65403		32.851	13.971
34.1427	6.45933		32.864	10.2035		34.1427	9.81562		32.864	13.418
34.157	6.03488		32.877	10.9108		34.157	9.70789		32.877	13.7594
34.1713	6.10434		32.89	11.5098		34.1713	9.78247		32.89	15.2551
34.1856	5.94613		32.903	12.2622		34.1856	9.53387		32.903	16.823
34.1999	5.97314		32.916	13.3217		34.1999	9.69546		32.916	17.8281
34.2142	6.01945		32.929	14.2397		34.2142	9.62088		32.929	17.8714
34.2285	6.24325		32.942	15.4828		34.2285	9.89434		32.942	19.0497
34.2428	6.2008		32.955	16.8433		34.2428	9.48415		32.955	22.0122
34.2571	6.1545		32.968	19.1578		34.2571	9.88191		32.968	23.5656
34.2714	6.1545		32.981	20.4581		34.2714	9.88191		32.981	24.7728
34.2857	6.00787		32.994	20.5574		34.2857	9.56702		32.994	26.6917
34.3	6.15836		33.007	22.2219		34.3	9.70789		33.007	27.9806
34.3143	6.17379		33.02	24.985		34.3143	9.43443		33.02	28.9617
34.3286	5.91912		33.033	27.2604		34.3286	9.41371		33.033	30.0871
34.3429	6.00787		33.046	28.7292		34.3429	9.50487		33.046	30.6738
34.3572	5.89211		33.059	29.572		34.3572	9.26041		33.059	31.073
34.3715	6.37444		33.072	29.7556		34.3715	9.84877		33.072	31.2413
34.3858	6.27797		33.085	30.0746		34.3858	9.50487		33.085	30.8854
34.4001	6.01173		33.098	31.0348		34.4001	9.48001		33.098	31.1836
34.4144	6.13521		33.111	31.5164		34.4144	9.69132		33.111	31.5491
34.4287	6.10434		33.124	30.9866		34.4287	9.422		33.124	33.1121
34.443	6.06961		33.137	31.1702		34.443	9.40543		33.137	33.343
34.4573	6.12363		33.15	29.5268		34.4573	9.04496		33.15	30.9383
34.4716	5.97314		33.163	27.8263		34.4716	9.46758		33.163	28.3172
34.4859	6.12749		33.176	26.511		34.4859	8.90822		33.176	27.8459
34.5002	5.8651		33.189	24.6539		34.5002	9.31842		33.189	27.5189
34.5145	5.94613		33.202	23.1369		34.5145	9.18583		33.202	25.6625
34.5288	6.08504		33.215	21.9239		34.5288	8.99524		33.215	24.59
34.5431	5.80722		33.228	19.2692		34.5431	9.19826		33.228	23.5127
34.5574	6.1082		33.241	18.2368		34.5574	9.57116		33.241	20.4636
34.5717	6.10434		33.254	16.0968		34.5717	9.16926		33.254	20.2857
34.586	5.6606		33.267	14.8116		34.586	9.38471		33.267	19.5306
34.6003	5.83423		33.28	14.3571		34.6003	9.14025		33.28	16.9336
34.6146	5.99244		33.293	13.0026		34.6146	9.35985		33.293	16.116
34.6289	6.05803		33.306	11.579		34.6289	9.1734		33.306	15.8948
34.6432	5.82266		33.319	10.682		34.6432	9.36814		33.319	15.1638
34.6575	6.10048		33.332	11.4104		34.6575	9.46758		33.332	13.0044
34.6718	5.97314		33.345	9.86636		34.6718	9.31842		33.345	13.1631
34.6861	6.27797		33.358	8.96641		34.6861	9.28527		33.358	11.3596
34.7004	5.94999		33.371	8.71057		34.7004	9.23141		33.371	10.9604
34.7147	5.9963		33.384	8.75572		34.7147	8.91237		33.384	11.7347
34.729	5.88825		33.397	7.94606		34.729	8.93723		33.397	11.2009
34.7433	6.03488		33.41	7.94907		34.7433	9.41786		33.41	10.6093
34.7576	5.71462		33.423	7.38322		34.7576	9.33913		33.423	10.4891
34.7719	5.75706		33.436	7.0732		34.7719	9.40543		33.436	9.18097
34.7862	6.13906		33.449	6.90766		34.7862	9.32256		33.449	8.24316
34.8005	5.94613		33.462	7.5307		34.8005	9.38057		33.462	8.48362
34.8148	6.05418		33.475	6.82639		34.8148	9.17754		33.475	7.79589
34.8291	5.75706		33.488	6.55851		34.8291	9.18583		33.488	8.01231
34.8434	5.58342		33.501	6.33879		34.8434	9.23555		33.501	7.28611
34.8577	5.85739		33.514	6.4622		34.8577	9.08639		33.514	7.81032
34.872	5.94228		33.527	6.40501		34.872	9.33499		33.527	7.56986
34.8863	5.96543		33.54	6.6458		34.8863	8.64719		33.54	7.89208
34.9006	5.93456		33.553	6.83542		34.9006	9.18997		33.553	9.39739
34.9149	5.83809		33.566	6.14917		34.9149	9.20655		33.566	8.48843
34.9292	5.96157		33.579	6.23044		34.9292	9.08639		33.579	8.75295
34.9435	5.94999		33.592	5.69468		34.9435	8.99109		33.592	7.94498
34.9578	6.02331		33.605	5.83313		34.9578	9.25627		33.605	8.13254
34.9721	5.8188		33.618	5.62244		34.9721	8.91237		33.618	6.94464
34.9864	5.89983		33.631	5.44185		34.9864	9.02838		33.631	7.58428
35.0007	5.74934		33.644	5.06261		35.0007	8.76735		33.644	6.78113
35.015	5.81494		33.657	6.07392		35.015	8.98281		33.657	6.87731
35.0293	5.83809		33.67	5.87226		35.0293	9.05739		33.67	7.35344
35.0436	5.81108		33.683	5.95654		35.0436	8.97452		33.683	7.31015
35.0579	5.79565		33.696	5.40874		35.0579	9.00767		33.696	7.17068
35.0722	5.99244		33.709	5.04154		35.0722	8.83364		33.709	6.43005
35.0865	5.76864		33.722	4.82784		35.0865	8.80464		33.722	6.43967
35.1008	5.86896		33.735	4.98435		35.1008	8.87508		33.735	7.61314
35.1151	5.66831		33.748	5.16494		35.1151	9.1734		33.748	6.27134
35.1294	5.80336		33.761	5.1228		35.1294	9.0201		33.761	6.77151
35.1437	5.64902		33.774	5.25223		35.1437	9.25212		33.774	8.09407
35.158	5.81494		33.787	5.29437		35.158	8.82121		33.787	6.93022
35.1723	5.79565		33.8	5.37864		35.1723	8.85436		33.8	6.01164
35.1866	5.8844		33.813	5.01746		35.1866	8.77978		33.813	5.95874
35.2009	5.72233		33.826	4.80978		35.2009	8.75078		33.826	6.42043
35.2152	5.97314		33.839	5.14688		35.2152	8.84607		33.839	6.32905
35.2295	6.11205		33.852	5.183		35.2295	9.01595		33.852	5.77117
35.2438	5.8188		33.865	4.82483		35.2438	8.77978		33.865	6.5599
35.2581	5.76092		33.878	5.1529		35.2581	9.09468		33.878	6.33386
35.2724	5.74549		33.891	4.79473		35.2724	8.90822		33.891	6.44929
35.2867	5.74549		33.904	4.91512		35.2867	8.90822		33.904	6.4541
35.301	5.76092		33.917	4.82182		35.301	8.8005		33.917	6.75227
35.3153	5.71462		33.93	4.97532		35.3153	9.23141		33.93	6.64166
35.3296	5.8188		33.943	4.83987		35.3296	8.82536		33.943	6.06454
35.3439	5.52169		33.956	4.37033		35.3439	8.75906		33.956	6.46852
35.3582	5.35191		33.969	4.49374		35.3582	8.55604		33.969	6.38196
35.3725	5.62973		33.982	5.183		35.3725	8.63476		33.982	6.33386
35.3868	5.59886		33.995	5.29738		35.3868	8.95794		33.995	6.42043
35.4011	5.74934		34.008	4.67734		35.4011	8.5519		34.008	6.30501
35.4154	5.59886		34.021	4.65025		35.4154	8.5519		34.021	6.73304
35.4297	5.93842		34.034	4.2981		35.4297	8.63891		34.034	6.58395
35.444	5.8188		34.047	5.38466		35.444	8.69277		34.047	6.57914
35.4583	6.03488		34.06	5.43282		35.4583	8.68863		34.06	6.10782
35.4726	5.39821		34.073	4.22887		35.4726	8.89579		34.073	5.28062
35.4869	5.92298		34.086	4.00313		35.4869	8.86265		34.086	5.42009
35.5012	5.80722		34.099	4.47869		35.5012	8.65134		34.099	6.3531
35.5155	6.05032		34.112	4.60811		35.5155	9.18997		34.112	6.26653
35.5298	5.61815		34.125	4.51782		35.5298	8.9248		34.125	6.10302
35.5441	5.84581		34.138	4.48471		35.5441	8.65548		34.138	6.00683
35.5584	5.53712		34.151	4.63219		35.5584	8.75078		34.151	6.39157
35.5727	5.49853		34.164	5.01746		35.5727	8.46074		34.164	6.06935
35.587	5.43294		34.177	4.62918		35.587	8.68448		34.177	5.70384
35.6013	5.66831		34.19	4.59908		35.6013	8.42759		34.19	6.03569
35.6156	5.75706		34.203	4.86395		35.6156	8.30744		34.203	6.58395
35.6299	5.57571		34.216	4.73754		35.6299	8.25357		34.216	6.36272
35.6442	5.79951		34.229	4.56899		35.6442	8.30744		34.229	5.95874
35.6585	5.71462		34.242	4.81279		35.6585	8.49389		34.242	5.91545
35.6728	5.66831		34.255	4.879		35.6728	8.10856		34.255	5.9395
35.6871	5.66831		34.268	4.40645		35.6871	8.35716		34.268	6.34348
35.7014	5.88054		34.281	4.34325		35.7014	8.57261		34.281	6.70899
35.7157	5.44065		34.294	4.4215		35.7157	8.41931		34.294	6.5599
35.73	5.6413		34.307	4.33422		35.73	8.27429		34.307	6.56471
35.7443	5.67603		34.32	4.39441		35.7443	8.63062		34.32	6.73304
35.7586	5.62201		34.333	4.45461		35.7586	8.65134		34.333	6.78113
35.7729	5.78407		34.346	4.62617		35.7729	8.76735		34.346	6.82922
35.7872	5.67603		34.359	4.64724		35.7872	8.79221		34.359	6.3002
35.8015	5.67603		34.372	4.62015		35.8015	8.79221		34.372	5.61247
35.8158	5.44837		34.385	4.94522		35.8158	8.5519		34.385	5.86736
35.8301	5.61815		34.398	5.00542		35.8301	8.57676		34.398	6.03088
35.8444	5.84581		34.411	4.72851		35.8444	8.74663		34.411	5.65575
35.8587	5.63744		34.424	4.33422		35.8587	8.29915		34.424	6.16073
35.873	5.5294		34.437	4.40043		35.873	8.50632		34.437	6.21363
35.8873	5.54484		34.45	4.92114		35.8873	8.59747		34.45	5.85774
35.9016	5.62973		34.463	4.73453		35.9016	8.31572		34.463	6.6609
35.9159	5.595		34.476	4.93619		35.9159	8.39445		34.476	6.28096
35.9302	5.46381		34.489	5.07464		35.9302	8.56847		34.489	6.52623
35.9445	5.57185		34.502	4.96027		35.9445	8.45245		34.502	6.23287
35.9588	5.74934		34.515	4.36431		35.9588	8.65548		34.515	5.70865
35.9731	5.61429		34.528	3.81953		35.9731	8.47317		34.528	6.15592
35.9874	5.27473		34.541	4.34626		35.9874	8.27429		34.541	6.56952
36.0017	5.35191		34.554	4.35228		36.0017	8.31987		34.554	6.50219
36.016	5.53712		34.567	4.65326		36.016	8.49389		34.567	6.05973
36.0303	5.47924		34.58	4.86395		36.0303	8.70934		34.58	5.70865
36.0446	5.54098		34.593	4.21984		36.0446	8.17071		34.593	5.67499
36.0589	5.62973		34.606	4.19576		36.0589	8.63891		34.606	5.68941
36.0732	5.69532		34.619	4.13857		36.0732	8.74663		34.619	5.63651
36.0875	5.44837		34.632	3.76234		36.0875	8.44417		34.632	5.49704
36.1018	5.62587		34.645	4.22285		36.1018	8.7052		34.645	5.80965
36.1161	5.15512		34.658	4.64122		36.1161	8.58919		34.658	5.69422
36.1304	5.68761		34.671	4.09644		36.1304	8.69277		34.671	5.44414
36.1447	5.3712		34.684	4.30412		36.1447	8.208		34.684	5.76636
36.159	5.35576		34.697	4.59908		36.159	8.3903		34.697	6.74265
36.1733	5.45609		34.71	4.38538		36.1733	8.51875		34.71	6.44448
36.1876	5.36734		34.723	4.17469		36.1876	8.53118		34.723	6.60318
36.2019	5.50239		34.736	4.61112		36.2019	8.37787		34.736	6.30501
36.2162	5.53326		34.749	4.89104		36.2162	8.237		34.749	5.70384
36.2305	5.3712		34.762	4.58404		36.2305	8.41931		34.762	6.08378
36.2448	5.49468		34.775	4.15061		36.2448	8.4856		34.775	6.05011
36.2591	5.24001		34.788	4.30713		36.2591	8.46489		34.788	6.48776
36.2734	5.52169		34.801	4.30111		36.2734	7.90139		34.801	5.8385
36.2877	5.44065		34.814	4.08741		36.2877	8.43174		34.814	5.93469
36.302	5.44065		34.827	4.19576		36.302	8.43174		34.827	5.80484
36.3163	5.46766		34.84	3.62389		36.3163	8.17899		34.84	6.49257
36.3306	5.60272		34.853	4.60811		36.3306	8.20385		34.853	5.97797
36.3449	5.42908		34.866	4.268		36.3449	7.99254		34.866	5.69903
36.3592	5.56027		34.879	3.82555		36.3592	8.31987		34.879	6.51181
36.3735	5.38278		34.892	4.31616		36.3735	8.18728		34.892	5.473
36.3878	5.15126		34.905	4.00614		36.3878	8.01326		34.905	6.99274
36.4021	5.44451		34.918	4.73152		36.4021	8.25772		34.918	6.30501
36.4164	5.42522		34.931	4.91211		36.4164	8.02983		34.931	6.43967
36.4307	5.36348		34.944	3.85866		36.4307	8.40273		34.944	6.20882
36.445	5.42522		34.957	4.36732		36.445	8.22871		34.957	6.49257
36.4593	5.40593		34.97	5.17096		36.4593	8.22457		34.97	6.96869
36.4736	5.26702		34.983	4.52685		36.4736	8.30744		34.983	7.92093
36.4879	5.29017		34.996	4.22285		36.4879	8.05055		34.996	6.10782
36.5022	5.23615		35.009	4.27101		36.5022	8.44002		35.009	5.59804
36.5165	5.24772		35.022	4.21683		36.5165	8.28672		35.022	5.94431
36.5308	5.24001		35.035	3.81652		36.5308	7.93453		35.035	5.55475
36.5451	5.55255		35.048	3.51252		36.5451	8.34473		35.048	6.51662
36.5594	5.49082		35.061	3.62991		36.5594	8.02569		35.061	6.50219
36.5737	5.29017		35.074	4.21984		36.5737	8.07127		35.074	5.56918
36.588	5.49468		35.087	3.78341		36.588	8.20385		35.087	6.26653
36.6023	5.66831		35.1	3.92186		36.6023	8.13756		35.1	6.60799
36.6166	5.49468		35.113	3.97002		36.6166	7.50777		35.113	6.21363
36.6309	5.51397		35.126	3.81652		36.6309	8.18314		35.126	5.94431
36.6452	5.33261		35.139	4.67734		36.6452	8.07955		35.139	6.16554
36.6595	5.22071		35.152	4.35228		36.6595	8.24114		35.152	5.34314
36.6738	5.47538		35.165	4.12052		36.6738	7.90967		35.165	5.47781
36.6881	5.3056		35.178	4.37033		36.6881	7.97597		35.178	5.65094
36.7024	5.37506		35.191	4.49976		36.7024	8.07127		35.191	5.23734
36.7167	5.57185		35.204	4.04828		36.7167	8.35301		35.204	5.03054
36.731	5.29789		35.217	3.48242		36.731	8.37373		35.217	5.73751
36.7453	5.42136		35.23	3.56369		36.7453	8.11684		35.23	5.8385
36.7596	5.58342		35.243	3.91885		36.7596	8.11684		35.243	5.14115
36.7739	5.23615		35.256	4.12052		36.7739	8.02983		35.256	5.92507
36.7882	5.52169		35.269	3.92186		36.7882	8.22043		35.269	6.90136
36.8025	5.44451		35.282	4.39742		36.8025	7.88067		35.282	5.69903
36.8168	5.44451		35.295	4.08139		36.8168	7.88067		35.295	5.53071
36.8311	5.58728		35.308	4.37635		36.8311	8.19142		35.308	6.3002
36.8454	5.49082		35.321	4.12954		36.8454	7.75223		35.321	5.6317
36.8597	5.10495		35.334	3.9941		36.8597	8.1417		35.334	5.67018
36.874	5.19756		35.347	3.8105		36.874	7.72737		35.347	5.41047
36.8883	5.32104		35.36	4.0242		36.8883	7.66936		35.36	6.01164
36.9026	5.34033		35.373	4.34024		36.9026	7.84752		35.373	5.5259
36.9169	4.91974		35.386	4.32218		36.9169	7.82266		35.386	6.64166
36.9312	5.27088		35.399	4.41548		36.9312	7.88067		35.399	6.39638
36.9455	5.06637		35.412	4.18974		36.9455	7.92625		35.412	5.22291
36.9598	5.17441		35.425	3.87672		36.9598	8.12927		35.425	4.98245
36.9741	5.35191		35.438	3.67806		36.9741	7.94696		35.438	5.84331
36.9884	5.15512		35.451	3.66903		36.9884	8.05884		35.451	6.3002
37.0027	5.41364		35.464	4.07236		37.0027	8.06712		35.464	5.6798
37.017	5.52554		35.477	4.19576		37.017	7.78537		35.477	4.53037
37.0313	5.26316		35.49	3.88876		37.0313	8.42345		35.49	5.01611
37.0456	5.35962		35.503	3.97905		37.0456	8.37373		35.503	6.23768
37.0599	5.2593		35.516	3.87672		37.0599	8.06712		35.516	6.13668
37.0742	5.32104		35.529	3.70515		37.0742	8.31987		35.529	5.41528
37.0885	5.08566		35.542	4.21683		37.0885	7.93868		35.542	5.52109
37.1028	5.29017		35.555	4.59006		37.1028	8.12513		35.555	5.87217
37.1171	5.4368		35.568	4.25295		37.1171	7.76466		35.568	5.47781
37.1314	5.17827		35.581	4.13255		37.1314	7.62793		35.581	5.95874
37.1457	5.27859		35.594	4.32218		37.1457	8.17071		35.594	6.33386
37.16	5.17441		35.607	4.04226		37.16	8.05055		35.607	5.54994
37.1743	5.22843		35.62	3.92788		37.1743	8.03398		35.62	5.12192
37.1886	5.22843		35.633	4.28606		37.1886	8.05469		35.633	4.81893
37.2029	5.31718		35.646	4.46966		37.2029	7.97183		35.646	4.86702
37.2172	5.21685		35.659	4.40043		37.2172	7.50777		35.659	5.30948
37.2315	5.30946		35.672	4.06935		37.2315	8.0174		35.672	5.23253
37.2458	5.17441		35.685	3.98206		37.2458	8.05469		35.685	5.52109
37.2601	5.35962		35.698	4.28004		37.2601	8.02569		35.698	6.19439
37.2744	5.42908		35.711	4.27402		37.2744	7.75637		35.711	6.01164
37.2887	5.35962		35.724	4.28004		37.2887	7.90967		35.724	5.50666
37.303	5.30946		35.737	4.24693		37.303	7.94282		35.737	5.51628
37.3173	5.22071		35.75	4.15964		37.3173	7.71494		35.75	5.80965
37.3316	5.22071		35.763	4.47267		37.3316	7.71494		35.763	5.58842
37.3459	5.55641		35.776	4.5118		37.3459	7.82266		35.776	5.18444
37.3602	5.11653		35.789	4.53889		37.3602	7.81852		35.789	5.55956
37.3745	5.213		35.802	4.33723		37.3745	7.9221		35.802	6.16073
37.3888	4.92746		35.815	4.16265		37.3888	7.6155		35.815	5.84812
37.4031	4.88887		35.828	4.17469		37.4031	7.87653		35.828	5.58842
37.4174	5.3056		35.841	4.09644		37.4174	7.84752		35.841	6.30501
37.4317	5.213		35.854	3.74127		37.4317	7.96768		35.854	5.71346
37.446	5.33647		35.867	3.90079		37.446	7.56578		35.867	5.58842
37.4603	5.32875		35.88	4.29509		37.4603	7.76466		35.88	5.45857
37.4746	5.39435		35.893	4.34626		37.4746	7.99669		35.893	5.07382
37.4889	5.20528		35.906	4.02721		37.4889	7.73151		35.906	5.89622
37.5032	4.99691		35.919	4.0844		37.5032	7.42076		35.919	5.38162
37.5175	5.22071		35.932	3.91584		37.5175	8.15413		35.932	6.25691
37.5318	5.32875		35.945	3.81351		37.5318	7.9221		35.945	6.3002
37.5461	5.35576		35.958	4.66229		37.5461	7.90553		35.958	5.64613
37.5604	5.25158		35.971	4.23188		37.5604	8.05469		35.971	5.54514
37.5747	5.17441		35.984	4.12052		37.5747	7.81438		35.984	4.78045
37.589	5.33261		35.997	4.22586		37.589	7.42904		35.997	5.89622
37.6033	5.18984		36.01	4.10547		37.6033	7.75223		36.01	5.81927
37.6176	5.05093		36.023	3.60884		37.6176	7.75637		36.023	4.92954
37.6319	5.05093		36.036	4.24392		37.6319	7.80609		36.036	4.51113
37.6462	5.22457		36.049	3.64496		37.6462	7.48291		36.049	5.13634
37.6605	4.85414		36.062	3.52456		37.6605	7.48705		36.062	6.18958
37.6748	5.02006		36.075	4.27101		37.6748	7.9594		36.075	5.83369
37.6891	5.22457		36.088	3.8406		37.6891	7.50777		36.088	5.45857
37.7034	5.31332		36.101	3.53359		37.7034	7.29646		36.101	4.71312
37.7177	5.12425		36.114	4.34024		37.7177	7.61964		36.114	6.54547
37.732	4.93518		36.127	3.75331		37.732	7.93453		36.127	5.83369
37.7463	5.07409		36.14	3.90681		37.7463	7.70251		36.14	5.62208
37.7606	5.13582		36.153	3.83458		37.7606	7.72737		36.153	5.98278
37.7749	5.10881		36.166	3.66903		37.7749	7.86824		36.166	5.62689
37.7892	5.1011		36.179	3.90681		37.7892	7.84752		36.179	5.09787
37.8035	5.17827		36.192	3.10619		37.8035	7.74394		36.192	5.67018
37.8178	5.1474		36.205	4.11751		37.8178	7.85995		36.205	4.87183
37.8321	5.15512		36.218	4.03624		37.8321	7.53677		36.218	5.08344
37.8464	5.15512		36.231	4.09644		37.8464	7.53677		36.231	4.79488
37.8607	5.20914		36.244	4.1476		37.8607	7.6155		36.244	5.80965
37.875	5.00463		36.257	3.85264		37.875	8.0174		36.257	5.43933
37.8893	5.13582		36.27	3.79244		37.8893	7.50363		36.27	5.67499
37.9036	5.10495		36.283	4.24091		37.9036	7.38347		36.283	6.10302
37.9179	5.29017		36.296	4.00614		37.9179	7.40418		36.296	4.97283
37.9322	5.213		36.309	3.97303		37.9322	7.57406		36.309	6.26172
37.9465	4.9236		36.322	4.20479		37.9465	7.57821		36.322	4.44861
37.9608	5.17827		36.335	3.72622		37.9608	7.88481		36.335	4.92473
37.9751	5.16283		36.348	3.90079		37.9751	7.76051		36.348	5.94912
37.9894	5.06637		36.361	4.55695		37.9894	8.00083		36.361	6.77151
38.0037	5.10495		36.374	4.38237		38.0037	7.30474		36.374	5.14596
38.018	5.1937		36.387	4.55695		38.018	7.48705		36.387	5.35276
38.0323	4.88887		36.4	4.03323		38.0323	7.16801		36.4	4.91031
38.0466	5.04708		36.413	4.02721		38.0466	7.54092		36.413	5.07382
38.0609	5.11267		36.426	3.55466		38.0609	7.30474		36.426	4.84298
38.0752	5.12811		36.439	3.964		38.0752	7.62793		36.439	4.68427
38.0895	5.07023		36.452	3.85264		38.0895	7.40418		36.452	5.41047
38.1038	5.14354		36.465	4.00313		38.1038	7.60307		36.465	5.98278
38.1181	5.1011		36.478	3.6269		38.1181	7.9221		36.478	4.72274
38.1324	5.16669		36.491	4.27703		38.1324	7.5492		36.491	5.51147
38.1467	4.85029		36.504	4.07838		38.1467	7.44148		36.504	5.29024
38.161	5.13968		36.517	4.02721		38.161	7.30889		36.517	5.89622
38.1753	5.04708		36.53	4.41849		38.1753	7.54092		36.53	5.44414
38.1896	4.84643		36.543	3.8707		38.1896	7.48705		36.543	5.05939
38.2039	4.89659		36.556	3.63292		38.2039	7.35032		36.556	5.33834
38.2182	4.93903		36.569	3.42523		38.2182	7.15558		36.569	5.13634
38.2325	5.20142		36.582	3.73826		38.2325	7.46634		36.582	5.34314
38.2468	5.12039		36.595	3.76234		38.2468	7.40833		36.595	4.89107
38.2611	5.25544		36.608	4.0242		38.2611	7.37518		36.608	5.49704
38.2754	5.33261		36.621	4.23489		38.2754	7.40833		36.621	5.66537
38.2897	4.73839		36.634	3.46737		38.2897	7.35446		36.634	4.96802
38.304	4.99691		36.647	4.01818		38.304	7.54092		36.647	4.95359
38.3183	5.04708		36.66	3.91885		38.3183	7.56578		36.66	5.55956
38.3326	5.11653		36.673	3.77438		38.3326	7.54506		36.673	5.43933
38.3469	5.00849		36.686	4.10246		38.3469	7.70251		36.686	5.58842
38.3612	5.07794		36.699	4.10246		38.3612	7.45391		36.699	5.55956
38.3755	4.9892		36.712	3.97303		38.3755	7.31303		36.712	5.64132
38.3898	4.88887		36.725	3.94293		38.3898	7.51191		36.725	5.72308
38.4041	5.11267		36.738	3.78642		38.4041	7.15144		36.738	5.50666
38.4184	5.13582		36.751	3.47339		38.4184	7.38347		36.751	6.54547
38.4327	4.91202		36.764	3.62389		38.4327	7.31717		36.764	6.19439
38.447	4.93132		36.777	4.18071		38.447	7.55749		36.777	5.45857
38.4613	4.60719		36.79	4.26198		38.4613	7.40004		36.79	5.53071
38.4756	4.93518		36.803	4.00915		38.4756	7.22602		36.803	5.31429
38.4899	4.90431		36.816	4.15964		38.4899	7.38347		36.816	4.98726
38.5042	4.91588		36.829	4.1777		38.5042	7.55749		36.829	5.12673
38.5185	4.71909		36.842	4.1145		38.5185	7.40004		36.842	5.64132
38.5328	4.75768		36.855	4.10246		38.5328	7.2716		36.855	5.94431
38.5471	4.86958		36.868	4.21081		38.5471	7.4249		36.868	5.49223
38.5614	4.93518		36.881	3.81953		38.5614	7.48291		36.881	5.81927
38.5757	4.93132		36.894	4.01818		38.5757	7.54092		36.894	5.9924
38.59	4.83485		36.907	4.06333		38.59	7.53263		36.907	5.35757
38.6043	5.01235		36.92	3.68709		38.6043	7.34203		36.92	5.60766
38.6186	4.93132		36.933	3.86769		38.6186	7.32132		36.933	5.39124
38.6329	4.83099		36.946	3.85565		38.6329	7.23016		36.946	5.3191
38.6472	4.82713		36.959	4.24994		38.6472	7.45805		36.959	5.78079
38.6615	4.92746		36.972	4.60209		38.6615	7.17216		36.972	5.44414
38.6758	4.86186		36.985	4.35529		38.6758	7.40004		36.985	5.16039
38.6901	4.92746		36.998	4.15362		38.6901	7.3006		36.998	4.89588
38.7044	4.82713		37.011	4.15964		38.7044	7.28403		37.011	5.07382
38.7187	4.82713		37.024	4.23489		38.7187	7.05614		37.024	5.42009
38.733	5.12425		37.037	3.93691		38.733	7.10586		37.037	4.90069
38.7473	4.7654		37.05	4.09343		38.7473	7.25088		37.05	4.68908
38.7616	4.99691		37.063	4.40946		38.7616	7.16801		37.063	5.271
38.7759	5.10881		37.076	4.15362		38.7759	7.55335		37.076	5.20367
38.7902	5.05865		37.089	4.32218		38.7902	7.46219		37.089	5.45376
38.8045	5.13582		37.102	4.51782		38.8045	7.23016		37.102	5.71827
38.8188	5.13582		37.115	4.20479		38.8188	7.52434		37.115	5.20367
38.8331	5.03936		37.128	3.59078		38.8331	7.40418		37.128	5.15077
38.8474	4.6998		37.141	3.00987		38.8474	7.29646		37.141	5.24215
38.8617	4.6998		37.154	3.24765		38.8617	7.29646		37.154	5.38162
38.876	5.1474		37.167	3.45834		38.876	7.07686		37.167	6.07416
38.8903	5.13582		37.18	3.50951		38.8903	7.61964		37.18	5.94431
38.9046	4.97762		37.193	4.1145		38.9046	7.42076		37.193	5.65094
38.9189	4.97376		37.206	3.54864		38.9189	7.11829		37.206	5.81927
38.9332	4.858		37.219	3.61185		38.9332	7.09343		37.219	5.79041
38.9475	4.68436		37.232	3.67505		38.9475	7.36275		37.232	5.76155
38.9618	4.91974		37.245	3.92186		38.9618	7.40418		37.245	5.95393
38.9761	4.90431		37.258	4.09343		38.9761	7.47048		37.258	5.97797
38.9904	5.04708		37.271	3.98808		38.9904	7.25088		37.271	5.4249
39.0047	4.70366		37.284	3.81351		39.0047	7.12658		37.284	5.62689
39.019	5.04708		37.297	3.46135		39.019	7.01885		37.297	4.88145
39.0333	4.84257		37.31	3.79846		39.0333	7.081		37.31	5.30467
39.0476	4.86958		37.323	3.83458		39.0476	6.96085		37.323	5.75194
39.0619	4.88887		37.336	3.80448		39.0619	7.48705		37.336	5.25177
39.0762	4.85029		37.349	3.49747		39.0762	7.3296		37.349	5.81927
39.0905	4.85414		37.362	3.80448		39.0905	7.3959		37.362	5.36238
39.1048	4.63806		37.375	4.34626		39.1048	7.53677		37.375	5.44895
39.1191	5.02392		37.388	3.79244		39.1191	7.47048		37.388	6.37234
39.1334	5.18599		37.401	3.93089		39.1334	6.91941		37.401	5.33353
39.1477	4.51459		37.414	3.67505		39.1477	6.80754		37.414	5.04016
39.162	4.73067		37.427	3.65098		39.162	7.43319		37.427	5.31429
39.1763	4.85414		37.44	3.28678		39.1763	7.23431		37.44	5.45376
39.1906	4.78855		37.453	3.4132		39.1906	7.45805		37.453	5.17001
39.2049	5.05093		37.466	4.06935		39.2049	7.37518		37.466	4.98726
39.2192	5.00077		37.479	4.09644		39.2192	7.33375		37.479	5.36238
39.2335	4.9699		37.492	3.77739		39.2335	7.49948		37.492	5.56918
39.2478	4.74996		37.505	3.58175		39.2478	7.052		37.505	4.80931
39.2621	5.00077		37.518	3.60583		39.2621	7.13901		37.518	5.56437
39.2764	4.76154		37.531	4.06935		39.2764	7.27988		37.531	5.29986
39.2907	5.05093		37.544	3.44329		39.2907	7.25088		37.544	5.5259
39.305	5.15898		37.557	2.88948		39.305	7.28817		37.557	5.32872
39.3193	4.69594		37.57	4.3914		39.3193	7.2053		37.57	4.77084
39.3336	4.80012		37.583	4.03323		39.3336	7.25502		37.583	5.5788
39.3479	4.71523		37.596	3.25969		39.3479	7.34203		37.596	4.57846
39.3622	4.86186		37.609	3.25066		39.3622	7.15973		37.609	5.13153
39.3765	4.86186		37.622	4.03925		39.3765	7.15973		37.622	5.23734
39.3908	4.99305		37.635	3.86167		39.3908	6.96085		37.635	5.15077
39.4051	4.91202		37.648	3.96701		39.4051	7.16387		37.648	5.87698
39.4194	4.88501		37.661	4.37033		39.4194	6.69153		37.661	6.50219
39.4337	4.73839		37.674	3.63894		39.4337	7.09758		37.674	4.43899
39.448	4.79626		37.687	4.43956		39.448	7.12658		37.687	4.72274
39.4623	4.78855		37.7	3.55767		39.4623	7.1473		37.7	4.76122
39.4766	4.66893		37.713	3.81351		39.4766	7.27988		37.713	4.97764
39.4909	4.73453		37.726	3.58476		39.4909	7.11829		37.726	5.38643
39.5052	4.58404		37.739	3.94895		39.5052	7.10172		37.739	5.52109
39.5195	4.55703		37.752	4.0543		39.5195	7.43319		37.752	5.73751
39.5338	4.57246		37.765	4.16566		39.5338	7.33375		37.765	5.52109
39.5481	4.41812		37.778	3.79846		39.5481	7.06029		37.778	4.94878
39.5624	4.88115		37.791	3.50349		39.5624	7.18459		37.791	5.7856
39.5767	4.88501		37.804	3.76234		39.5767	6.84483		37.804	5.40567
39.591	4.82328		37.817	4.19275		39.591	7.10172		37.817	4.97283
39.6053	4.62263		37.83	3.61486		39.6053	7.15973		37.83	5.25658
39.6196	4.83871		37.843	3.24464		39.6196	6.9567		37.843	4.91512
39.6339	4.86572		37.856	3.61787		39.6339	6.91527		37.856	4.42938
39.6482	4.81556		37.869	3.40417		39.6482	7.12658		37.869	5.07863
39.6625	4.83871		37.882	3.86769		39.6625	7.1473		37.882	4.73236
39.6768	4.59948		37.895	4.03323		39.6768	7.03128		37.895	5.41047
39.6911	4.81942		37.908	4.10246		39.6911	6.88626		37.908	5.42009
39.7054	4.76154		37.921	3.83458		39.7054	7.2053		37.921	5.44414
39.7197	4.80012		37.934	3.49145		39.7197	6.85312		37.934	5.37681
39.734	5.03936		37.947	3.85565		39.734	7.07272		37.947	5.05939
39.7483	4.88501		37.96	4.67433		39.7483	7.11829		37.96	5.67018
39.7626	5.04322		37.973	4.38839		39.7626	6.8324		37.973	5.89622
39.7769	5.05479		37.986	4.06935		39.7769	6.6128		37.986	5.93469
39.7912	4.78469		37.999	3.78642		39.7912	7.11001		37.999	5.99721
39.8055	4.71138		38.012	3.47038		39.8055	6.86969		38.012	5.65575
39.8198	4.83871		38.025	3.56971		39.8198	6.88212		38.025	5.73751
39.8341	5.12039		38.038	3.78943		39.8341	7.22188		38.038	5.05459
39.8484	4.9699		38.051	3.98808		39.8484	7.10172		38.051	4.86221
39.8627	4.73453		38.064	4.36732		39.8627	7.04786		38.064	5.48742
39.877	4.73453		38.077	4.22586		39.877	7.04786		38.077	5.35276
39.8913	4.76154		38.09	3.9038		39.8913	7.21359		38.09	4.98245
39.9056	4.81556		38.103	3.62389		39.9056	6.99399		38.103	4.79007
39.9199	4.9892		38.116	4.06032		39.9199	7.09758		38.116	6.13668
39.9342	4.68436		38.129	4.19275		39.9342	6.87798		38.129	6.10782
39.9485	4.77311		38.142	4.22586		39.9485	6.72467		38.142	5.27581
39.9628	4.40269		38.155	3.95497		39.9628	6.88626		38.155	4.94878
39.9771	4.45285		38.168	3.72923		39.9771	6.98156		38.168	4.70832
39.9914	4.69208		38.181	3.60884		39.9914	6.77854		38.181	5.03054
40.0057	4.66121		38.194	3.76836		40.0057	7.06857		38.194	5.41528
40.02	4.59948		38.207	3.60583		40.02	6.89041		38.207	5.80965
40.0343	4.6998		38.22	3.53058		40.0343	7.15558		38.22	5.80965
40.0486	4.6998		38.233	3.97303		40.0486	7.19702		38.233	4.99687
40.0629	4.74996		38.246	3.82555		40.0629	6.67081		38.246	4.97283
40.0772	4.72681		38.259	3.82856		40.0772	6.81168		38.259	5.48261
40.0915	4.7461		38.272	3.90982		40.0915	7.15558		38.272	5.43933
40.1058	4.83099		38.285	3.60282		40.1058	7.11001		38.285	5.18444
40.1201	4.90431		38.298	3.46737		40.1201	6.79511		38.298	5.12673
40.1344	4.83485		38.311	3.57573		40.1344	7.11001		38.311	5.40086
40.1487	4.73067		38.324	4.02721		40.1487	7.19702		38.324	5.08825
40.163	4.80012		38.337	3.83759		40.163	6.73296		38.337	4.73236
40.1773	4.6342		38.35	3.41019		40.1773	6.99814		38.35	5.44895
40.1916	4.80012		38.363	3.79846		40.1916	7.10172		38.363	6.11744
40.2059	4.54545		38.376	3.79244		40.2059	7.20116		38.376	5.51147
40.2202	4.6535		38.389	3.73826		40.2202	6.96913		38.389	4.48228
40.2345	4.83099		38.402	3.80448		40.2345	7.023		38.402	5.13634
40.2488	4.59948		38.415	3.95497		40.2488	7.18459		38.415	6.43486
40.2631	4.70366		38.428	4.00313		40.2631	6.8324		38.428	5.89622
40.2774	4.73839		38.441	3.69311		40.2774	6.78268		38.441	5.88179
40.2917	4.72295		38.454	3.95497		40.2917	6.50508		38.454	5.72308
40.306	4.73453		38.467	4.27703		40.306	6.99814		38.467	5.08825
40.3203	4.62649		38.48	3.70214		40.3203	6.90698		38.48	4.76603
40.3346	4.41812		38.493	3.30183		40.3346	7.16801		38.493	5.04978
40.3489	4.6535		38.506	3.95196		40.3489	6.94427		38.506	4.6987
40.3632	4.62263		38.519	3.70214		40.3632	7.33375		38.519	4.70832
40.3775	4.76154		38.532	3.74127		40.3775	7.13487		38.532	4.82374
40.3918	4.76154		38.545	4.04527		40.3918	7.13487		38.545	4.98245
40.4061	4.58018		38.558	3.73826		40.4061	7.11829		38.558	5.38643
40.4204	4.80012		38.571	4.21984		40.4204	6.74953		38.571	5.37681
40.4347	4.90431		38.584	3.53359		40.4347	6.94842		38.584	4.92954
40.449	4.84643		38.597	3.71418		40.449	6.9277		38.597	5.07863
40.4633	4.80784		38.61	3.80147		40.4633	7.07272		38.61	5.14115
40.4776	4.71523		38.623	3.68107		40.4776	6.89041		38.623	4.4438
40.4919	4.90431		38.636	3.95497		40.4919	6.55894		38.636	4.50151
40.5062	4.41812		38.649	3.97604		40.5062	7.10586		38.649	4.59289
40.5205	4.4297		38.662	3.78341		40.5205	7.01471		38.662	5.11711
40.5348	4.36024		38.675	3.43727		40.5348	7.081		38.675	4.30914
40.5491	4.61491		38.688	3.37708		40.5491	6.50093		38.688	5.37681
40.5634	4.64578		38.701	3.68107		40.5634	6.8614		38.701	5.03054
40.5777	4.69594		38.714	3.45232		40.5777	6.94013		38.714	4.87183
40.592	4.61491		38.727	3.95497		40.592	6.93599		38.727	4.74198
40.6063	4.78469		38.74	3.83157		40.6063	6.98156		38.74	5.21329
40.6206	4.79626		38.753	3.8707		40.6206	6.69153		38.753	4.6987
40.6349	4.7654		38.766	3.53359		40.6349	6.84897		38.766	5.41528
40.6492	4.50687		38.779	3.61787		40.6492	6.95256		38.779	5.64613
40.6635	4.67665		38.792	3.38009		40.6635	7.23431		38.792	5.31429
40.6778	4.68436		38.805	3.52757		40.6778	6.8614		38.805	5.05459
40.6921	4.74224		38.818	4.03624		40.6921	7.14315		38.818	5.73751
40.7064	4.61491		38.831	4.03925		40.7064	6.66667		38.831	5.2181
40.7207	4.5223		38.844	3.53058		40.7207	6.56308		38.844	5.67018
40.735	4.78083		38.857	3.80448		40.735	6.80754		38.857	5.51147
40.7493	4.63806		38.87	4.23188		40.7493	6.75368		38.87	4.81893
40.7636	4.61877		38.883	3.52456		40.7636	6.99814		38.883	5.5259
40.7779	4.83099		38.896	4.03022		40.7779	6.71224		38.896	5.09787
40.7922	4.51073		38.909	4.06333		40.7922	6.7081		38.909	4.86221
40.8065	4.66893		38.922	4.21081		40.8065	6.65009		38.922	4.57365
40.8208	4.43355		38.935	3.31086		40.8208	6.94842		38.935	5.91545
40.8351	4.45671		38.948	3.91584		40.8351	7.052		38.948	5.91545
40.8494	4.49529		38.961	4.17168		40.8494	6.88212		38.961	5.09787
40.8637	4.66121		38.974	4.55093		40.8637	6.93599		38.974	5.41047
40.878	4.81942		38.987	3.28979		40.878	7.2716		38.987	4.94397
40.8923	4.59948		39	3.90982		40.8923	6.77439		39	4.77084
40.9066	4.59948		39.013	4.21984		40.9066	6.77439		39.013	4.237
40.9209	4.51073		39.026	4.0543		40.9209	6.65838		39.026	4.87664
40.9352	4.83485		39.039	4.03323		40.9352	6.7081		39.039	4.82374
40.9495	4.55703		39.052	3.92788		40.9495	6.90698		39.052	5.10268
40.9638	4.50301		39.065	3.83458		40.9638	6.65009		39.065	5.77117
40.9781	4.73839		39.078	3.64195		40.9781	6.45536		39.078	6.44448
40.9924	4.67665		39.091	3.94293		40.9924	6.60866		39.091	4.66503
41.0067	4.63806		39.104	4.07838		41.0067	6.82826		39.104	4.77084
41.021	4.69594		39.117	3.31989		41.021	6.79925		39.117	4.8574
41.0353	4.6535		39.13	3.5065		41.0353	6.9567		39.13	5.32872
41.0496	4.6535		39.143	3.55767		41.0496	6.81583		39.143	4.53999
41.0639	4.57246		39.156	3.62389		41.0639	6.43878		39.156	4.55923
41.0782	4.84257		39.169	3.56971		41.0782	6.96499		39.169	5.22291
41.0925	4.86186		39.182	3.57573		41.0925	6.47193		39.182	5.27581
41.1068	4.62649		39.195	3.55767		41.1068	6.41392		39.195	5.35276
41.1211	4.5223		39.208	3.36805		41.1211	6.7081		39.208	5.24215
41.1354	4.53002		39.221	3.35601		41.1354	6.63766		39.221	5.372
41.1497	4.41812		39.234	3.97002		41.1497	6.90698		39.234	4.90069
41.164	4.39497		39.247	4.11751		41.164	6.77439		39.247	4.99206
41.1783	4.38339		39.26	3.68107		41.1783	6.80754		39.26	4.99206
41.1926	4.66507		39.273	3.86167		41.1926	6.79097		39.273	4.67946
41.2069	4.51073		39.286	4.15061		41.2069	6.72467		39.286	4.8045
41.2212	4.17889		39.299	3.30183		41.2212	6.78268		39.299	5.04016
41.2355	4.44513		39.312	3.01288		41.2355	7.00228		39.312	5.35757
41.2498	4.66121		39.325	3.25066		41.2498	6.65009		39.325	4.87183
41.2641	4.35252		39.338	3.40116		41.2641	6.70396		39.338	4.53518
41.2784	4.50687		39.351	3.44931		41.2784	6.66667		39.351	4.58327
41.2927	4.43355		39.364	3.50048		41.2927	6.90698		39.364	5.41528
41.307	4.5879		39.377	3.76836		41.307	6.86555		39.377	4.92954
41.3213	4.73839		39.39	4.32218		41.3213	6.81583		39.39	4.79488
41.3356	4.32551		39.403	4.61112		41.3356	6.79925		39.403	4.46304
41.3499	4.64192		39.416	3.87672		41.3499	6.72053		39.416	5.271
41.3642	4.46828		39.429	3.9038		41.3642	6.68738		39.429	5.2662
41.3785	4.5416		39.442	3.71418		41.3785	6.59209		39.442	4.71312
41.3928	4.60333		39.455	3.56971		41.3928	6.94427		39.455	5.29024
41.4071	4.60333		39.468	3.94895		41.4071	6.94427		39.468	5.18444
41.4214	4.22133		39.481	3.71117		41.4214	6.51336		39.481	4.57365
41.4357	4.33323		39.494	3.353		41.4357	6.85312		39.494	4.57846
41.45	4.63034		39.507	3.5667		41.45	6.67081		39.507	4.81412
41.4643	4.64192		39.52	3.85565		41.4643	6.49265		39.52	4.50632
41.4786	4.39883		39.533	3.62088		41.4786	6.63352		39.533	4.55442
41.4929	4.37568		39.546	3.68709		41.4929	6.51336		39.546	4.83336
41.5072	4.42198		39.559	3.78341		41.5072	6.50922		39.559	4.85259
41.5215	4.61491		39.572	3.69612		41.5215	6.66252		39.572	5.1652
41.5358	4.6535		39.585	3.75632		41.5358	6.65009		39.585	5.02092
41.5501	4.38725		39.598	3.43125		41.5501	6.65838		39.598	5.15077
41.5644	4.46828		39.611	3.39815		41.5644	6.56723		39.611	5.79041
41.5787	4.41812		39.624	3.58476		41.5787	6.40978		39.624	5.69903
41.593	4.4297		39.637	3.44931		41.593	6.69567		39.637	5.19406
41.6073	4.2522		39.65	3.60282		41.6073	6.7371		39.65	4.66984
41.6216	4.56089		39.663	4.06634		41.6216	6.71639		39.663	4.82855
41.6359	4.45285		39.676	4.04527		41.6359	6.44707		39.676	4.76122
41.6502	4.53388		39.689	3.95196		41.6502	6.54651		39.689	4.0831
41.6645	4.48372		39.702	3.97002		41.6645	6.5838		39.702	4.85259
41.6788	4.68822		39.715	3.68709		41.6788	6.81997		39.715	5.14596
41.6931	4.53774		39.728	3.50349		41.6931	6.45536		39.728	4.62656
41.7074	4.66893		39.741	3.61486		41.7074	6.72882		39.741	5.19887
41.7217	4.44127		39.754	3.57874		41.7217	6.51751		39.754	5.25658
41.736	4.49915		39.767	3.76234		41.736	6.43878		39.767	5.01611
41.7503	4.64964		39.78	4.00915		41.7503	6.87798		39.78	4.94397
41.7646	4.53388		39.793	3.17843		41.7646	6.66252		39.793	5.29024
41.7789	4.54931		39.806	3.42523		41.7789	6.75368		39.806	5.0642
41.7932	4.53388		39.819	3.22658		41.7932	6.67495		39.819	5.74232
41.8075	4.34481		39.832	3.50349		41.8075	6.63766		39.832	5.25177
41.8218	4.45671		39.845	3.53058		41.8218	6.61695		39.845	4.38128
41.8361	4.59948		39.858	3.61185		41.8361	6.3352		39.858	4.70351
41.8504	4.53388		39.871	4.25596		41.8504	6.56308		39.871	4.28029
41.8647	4.53388		39.884	3.59981		41.8647	6.72053		39.884	4.64098
41.879	4.6998		39.897	3.58777		41.879	6.4305		39.897	4.50151
41.8933	4.39497		39.91	4.15061		41.8933	6.54651		39.91	4.71793
41.9076	4.21361		39.923	3.59981		41.9076	6.49679		39.923	4.53999
41.9219	4.21361		39.936	3.46135		41.9219	6.49679		39.936	4.45342
41.9362	4.61491		39.949	3.15134		41.9362	6.56723		39.949	4.8574
41.9505	4.25606		39.962	3.45232		41.9505	6.69153		39.962	5.94431
41.9648	4.51459		39.975	3.79545		41.9648	6.62109		39.975	5.37681
41.9791	4.63034		39.988	3.60282		41.9791	6.43464		39.988	5.13153
41.9934	4.63034		40.001	3.32591		41.9934	6.59209		40.001	5.20848
42.0077	4.49529		40.014	3.67505		42.0077	6.55065		40.014	4.68427
42.022	4.74224		40.027	3.38912		42.022	6.72053		40.027	4.32838
42.0363	4.60719		40.04	3.7202		42.0363	6.62109		40.04	4.94878
42.0506	4.47214		40.053	3.9038		42.0506	6.65009		40.053	5.07382
42.0649	4.39883		40.066	4.19576		42.0649	6.71639		40.066	6.17516
42.0792	4.14802		40.079	3.28076		42.0792	6.51336		40.079	4.38609
42.0935	4.41812		40.092	3.60583		42.0935	6.5548		40.092	5.40086
42.1078	4.40269		40.105	3.84361		42.1078	6.74953		40.105	5.48261
42.1221	4.19818		40.118	3.38912		42.1221	6.67081		40.118	4.8574
42.1364	4.34095		40.131	3.61787		42.1364	6.56308		40.131	4.87183
42.1507	4.30622		40.144	2.72995		42.1507	6.45121		40.144	5.08825
42.165	4.51844		40.157	3.85565		42.165	6.45121		40.157	3.93883
42.1793	4.29464		40.17	3.93992		42.1793	6.39735		40.17	5.19406
42.1936	4.42198		40.183	3.85264		42.1936	6.60866		40.183	5.08825
42.2079	4.35638		40.196	3.79244		42.2079	6.67495		40.196	4.28029
42.2222	4.6998		40.209	3.55165		42.2222	6.52165		40.209	3.89554
42.2365	4.23676		40.222	3.69913		42.2365	6.40149		40.222	4.51113
42.2508	4.2985		40.235	4.0543		42.2508	6.69567		40.235	4.94397
42.2651	4.56861		40.248	3.97604		42.2651	6.77025		40.248	4.86221
42.2794	4.31394		40.261	3.45533		42.2794	6.30619		40.261	5.17963
42.2937	4.43741		40.274	3.45834		42.2937	6.16118		40.274	4.55923
42.308	4.47214		40.287	3.96701		42.308	6.65009		40.287	5.10749
42.3223	4.29464		40.3	3.7804		42.3223	6.57137		40.3	5.32391
42.3366	4.476		40.313	3.23862		42.3366	6.63352		40.313	4.237
42.3509	4.37953		40.326	3.92487		42.3509	6.38906		40.326	4.91992
42.3652	4.52616		40.339	3.19347		42.3652	6.44707		40.339	4.4438
42.3795	4.58018		40.352	2.96773		42.3795	6.71639		40.352	4.5448
42.3938	4.20975		40.365	3.44931		42.3938	6.69567		40.365	5.66537
42.4081	4.6998		40.378	4.12052		42.4081	6.53408		40.378	5.19406
42.4224	4.49915		40.391	3.80147		42.4224	6.53408		40.391	4.77084
42.4367	4.49915		40.404	3.80749		42.4367	6.53408		40.404	4.59289
42.451	4.33709		40.417	3.67204		42.451	6.70396		40.417	5.49223
42.4653	4.53388		40.43	3.04599		42.4653	6.67495		40.43	5.55475
42.4796	4.51459		40.443	3.53359		42.4796	6.94427		40.443	4.78526
42.4939	4.40269		40.456	3.76836		42.4939	6.37249		40.456	5.39124
42.5082	4.59948		40.469	3.55165		42.5082	6.22333		40.469	5.19406
42.5225	4.7654		40.482	3.53961		42.5225	6.76611		40.482	4.22738
42.5368	4.53388		40.495	3.99711		42.5368	6.65009		40.495	4.77565
42.5511	4.54545		40.508	3.40718		42.5511	6.47607		40.508	5.00168
42.5654	4.5416		40.521	3.89778		42.5654	6.62938		40.521	4.8574
42.5797	4.68051		40.534	3.49446		42.5797	6.69153		40.534	3.76569
42.594	4.34095		40.547	3.78943		42.594	6.74539		40.547	4.4438
42.6083	4.63806		40.56	3.73224		42.6083	6.76611		40.56	4.53037
42.6226	4.59948		40.573	3.49145		42.6226	6.74953		40.573	4.45823
42.6369	4.78469		40.586	3.34698		42.6369	6.82826		40.586	5.01611
42.6512	4.57632		40.599	3.50048		42.6512	6.61695		40.599	5.04016
42.6655	4.35638		40.612	3.76836		42.6655	6.44293		40.612	4.16005
42.6798	4.69208		40.625	3.66903		42.6798	6.40563		40.625	4.67946
42.6941	4.41812		40.638	3.19949		42.6941	6.52165		40.638	4.9055
42.7084	4.22905		40.651	3.1694		42.7084	6.54237		40.651	4.62175
42.7227	4.48758		40.664	3.21153		42.7227	6.4595		40.664	4.67465
42.737	4.5416		40.677	3.28678		42.737	6.48436		40.677	4.88145
42.7513	4.45285		40.69	3.64195		42.7513	6.6128		40.69	4.55923
42.7656	4.67665		40.703	3.8406		42.7656	6.23576		40.703	5.06901
42.7799	4.6535		40.716	3.74428		42.7799	6.74539		40.716	5.35757
42.7942	4.46828		40.729	3.7804		42.7942	6.37249		40.729	5.06901
42.8085	4.48372		40.742	3.74729		42.8085	6.5548		40.742	4.53037
42.8228	4.22133		40.755	3.89778		42.8228	6.51751		40.755	4.76122
42.8371	4.26763		40.768	3.97905		42.8371	6.31862		40.768	4.79007
42.8514	4.36024		40.781	3.84662		42.8514	6.38077		40.781	4.73717
42.8657	4.44899		40.794	3.49446		42.8657	6.43878		40.794	4.58808
42.88	4.54545		40.807	3.46135		42.88	6.62523		40.807	4.45823
42.8943	4.1866		40.82	3.83157		42.8943	6.44293		40.82	4.26586
42.9086	4.32165		40.833	3.53359		42.9086	6.59209		40.833	4.4919
42.9229	4.34481		40.846	3.46737		42.9229	6.63352		40.846	4.68427
42.9372	4.41812		40.859	3.83759		42.9372	6.26062		40.859	5.19406
42.9515	4.41812		40.872	3.83759		42.9515	6.26062		40.872	5.51628
42.9658	4.25606		40.885	3.73525		42.9658	6.4305		40.885	4.72755
42.9801	4.38725		40.898	3.64195		42.9801	6.59209		40.898	4.73717
42.9944	4.29464		40.911	3.76535		42.9944	6.3932		40.911	5.12192
43.0087	4.09014		40.924	3.81953		43.0087	6.00787		40.924	4.73236
43.023	4.25606		40.937	3.83458		43.023	5.9623		40.937	4.42938
43.0373	4.19818		40.95	3.74428		43.0373	6.19847		40.95	4.24662
43.0516	4.32551		40.963	3.55165		43.0516	6.47193		40.963	4.31395
43.0659	4.56475		40.976	3.55165		43.0659	6.53408		40.976	5.17482
43.0802	4.32937		40.989	3.2627		43.0802	6.18189		40.989	5.25177
43.0945	4.25606		41.002	3.39815		43.0945	6.44707		41.002	4.98726
43.1088	4.40269		41.015	3.56971		43.1088	5.99544		41.015	4.71793
43.1231	4.06313		41.028	3.69612		43.1231	5.97058		41.028	4.73717
43.1374	4.34481		41.041	3.72622		43.1374	6.2399		41.041	4.98245
43.1517	4.34481		41.054	3.36203		43.1517	6.37249		41.054	5.41047
43.166	4.29079		41.067	3.53359		43.166	6.38077		41.067	5.11711
43.1803	4.39883		41.08	3.70214		43.1803	6.55894		41.08	5.06901
43.1946	4.50687		41.093	3.52155		43.1946	6.30619		41.093	4.42938
43.2089	4.1866		41.106	3.39213		43.2089	6.24819		41.106	4.38128
43.2232	4.39111		41.119	3.24464		43.2232	6.4305		41.119	4.94397
43.2375	4.39883		41.132	3.72923		43.2375	6.52165		41.132	5.38643
43.2518	4.22905		41.145	3.86468		43.2518	6.3932		41.145	5.07863
43.2661	4.22905		41.158	3.37708		43.2661	5.96644		41.158	4.86702
43.2804	4.21747		41.171	3.4764		43.2804	6.31448		41.171	4.67465
43.2947	4.12101		41.184	3.09415		43.2947	6.43878		41.184	4.58327
43.309	4.38339		41.197	3.37106		43.309	6.12389		41.197	5.02573
43.3233	4.36024		41.21	3.59981		43.3233	6.19018		41.21	4.86702
43.3376	4.41812		41.223	4.00915		43.3376	6.45536		41.223	4.72755
43.3519	4.0747		41.236	3.78341		43.3519	5.96644		41.236	5.17001
43.3662	4.27149		41.249	3.58777		43.3662	6.22747		41.249	4.81893
43.3805	4.45671		41.262	3.41621		43.3805	6.48022		41.262	5.05939
43.3948	4.23291		41.275	3.64496		43.3948	6.08245		41.275	4.29952
43.4091	4.34095		41.288	3.72923		43.4091	6.31862		41.288	4.4438
43.4234	4.09014		41.301	3.37708		43.4234	6.21918		41.301	4.73717
43.4377	4.33323		41.314	3.17843		43.4377	6.24404		41.314	4.60251
43.452	4.02068		41.327	3.57874		43.452	6.05345		41.327	4.52075
43.4663	4.34481		41.34	3.34397		43.4663	6.11974		41.34	4.48709
43.4806	4.53774		41.353	3.1393		43.4806	6.23576		41.353	4.2851
43.4949	4.27149		41.366	3.01589		43.4949	6.43878		41.366	4.37647
43.5092	4.12872		41.379	3.2627		43.5092	6.36834		41.379	4.62175
43.5235	4.27149		41.392	2.88346		43.5235	6.06174		41.392	3.53003
43.5378	4.01296		41.405	3.44931		43.5378	5.99544		41.405	5.04978
43.5521	4.1866		41.418	3.65098		43.5521	6.47193		41.418	4.04944
43.5664	4.49529		41.431	3.7503		43.5664	6.49265		41.431	5.37681
43.5807	4.27535		41.444	3.54262		43.5807	5.81728		41.444	4.53037
43.595	4.03612		41.457	3.39213		43.595	6.26476		41.457	4.6506
43.6093	4.10171		41.47	3.16338		43.6093	6.12389		41.47	4.36204
43.6236	4.34481		41.483	3.2326		43.6236	6.35177		41.483	4.0302
43.6379	4.31008		41.496	3.72923		43.6379	6.3352		41.496	5.75194
43.6522	4.42584		41.509	3.55165		43.6522	6.38492		41.509	4.37647
43.6665	4.37953		41.522	3.19347		43.6665	6.18189		41.522	5.28543
43.6808	4.2522		41.535	2.9256		43.6808	6.19847		41.535	4.53518
43.6951	4.15959		41.548	2.91958		43.6951	6.54237		41.548	3.7705
43.7094	4.14802		41.561	3.03696		43.7094	6.46779		41.561	5.04978
43.7237	4.08242		41.574	3.75632		43.7237	5.9913		41.574	3.67912
43.738	4.24448		41.587	4.24693		43.738	5.92086		41.587	3.78974
43.7523	4.24062		41.6	3.20551		43.7523	6.09488		41.6	4.47266
43.7666	4.32937		41.613	3.65699		43.7666	6.21504		41.613	3.98692
43.7809	4.27921		41.626	3.01589		43.7809	6.43878		41.626	4.77565
43.7952	4.32551		41.639	3.46737		43.7952	6.2109		41.639	5.42009
43.8095	4.15188		41.652	3.30785		43.8095	6.15289		41.652	5.09787
43.8238	4.11329		41.665	2.5614		43.8238	5.93329		41.665	5.09306
43.8381	4.21361		41.678	3.30785		43.8381	6.07002		41.678	5.43452
43.8524	4.03226		41.691	2.67879		43.8524	6.26062		41.691	5.31429
43.8667	4.21747		41.704	3.53359		43.8667	6.26476		41.704	4.63137
43.881	4.34095		41.717	3.59981		43.881	6.27305		41.717	4.60251
43.8953	3.9628		41.73	3.45533		43.8953	6.19847		41.73	4.81893
43.9096	4.25606		41.743	3.75331		43.9096	6.20675		41.743	4.30433
43.9239	4.5223		41.756	3.45533		43.9239	6.07002		41.756	4.53518
43.9382	4.19818		41.769	3.41922		43.9382	6.1156		41.769	4.65541
43.9525	4.17503		41.782	3.43125		43.9525	6.25233		41.782	4.43418
43.9668	4.17503		41.795	3.62088		43.9668	6.25233		41.795	4.338
43.9811	4.14802		41.808	3.46135		43.9811	6.14875		41.808	4.99687
43.9954	4.10943		41.821	3.47038		43.9954	6.47607		41.821	5.08344
44.0097	4.37953		41.834	3.49145		44.0097	6.28133		41.834	4.83336
44.024	4.22519		41.847	3.64797		44.024	6.04102		41.847	4.93916
44.0383	4.16345		41.86	3.59078		44.0383	6.20261		41.86	4.68427
44.0526	4.14416		41.873	3.42222		44.0526	6.00373		41.873	4.95359
44.0669	4.17117		41.886	3.09114		44.0669	6.10317		41.886	5.03054
44.0812	4.15188		41.899	3.02191		44.0812	6.06588		41.899	5.06901
44.0955	4.31008		41.912	3.52155		44.0955	5.80899		41.912	4.6987
44.1098	4.26378		41.925	3.62991		44.1098	6.28548		41.925	4.32357
44.1241	4.08628		41.938	3.50048		44.1241	6.22747		41.938	4.03982
44.1384	4.46828		41.951	3.10017		44.1384	6.16118		41.951	4.61694
44.1527	4.27535		41.964	3.21454		44.1527	6.51751		41.964	4.48228
44.167	4.29464		41.977	3.41019		44.167	6.09903		41.977	4.91512
44.1813	4.26378		41.99	3.43125		44.1813	6.05759		41.99	4.89107
44.1956	4.26378		42.003	3.43125		44.1956	6.16946		42.003	4.60251
44.2099	4.15959		42.016	3.78341		44.2099	6.35177		42.016	4.83336
44.2242	4.33323		42.029	3.78341		44.2242	6.24404		42.029	4.1841
44.2385	4.26763		42.042	3.85565		44.2385	6.20675		42.042	4.0831
44.2528	4.16345		42.055	3.54563		44.2528	6.25233		42.055	4.28991
44.2671	4.29079		42.068	3.30785		44.2671	6.04931		42.068	4.31395
44.2814	4.22905		42.081	3.06405		44.2814	6.07831		42.081	4.53999
44.2957	4.02454		42.094	3.28076		44.2957	5.90843		42.094	4.58327
44.31	4.08242		42.107	3.32892		44.31	6.1156		42.107	5.02092
44.3243	3.94351		42.12	3.32892		44.3243	5.90429		42.12	4.68908
44.3386	4.21361		42.133	3.5366		44.3386	6.13217		42.133	4.09272
44.3529	4.15573		42.146	3.89477		44.3529	6.26476		42.146	4.16005
44.3672	4.05927		42.159	3.66602		44.3672	6.14046		42.159	4.74198
44.3815	4.15959		42.172	3.33795		44.3815	6.06174		42.172	5.14596
44.3958	4.24062		42.185	3.37708		44.3958	6.33105		42.185	4.74198
44.4101	4.25992		42.198	3.30484		44.4101	6.11146		42.198	4.05906
44.4244	4.42198		42.211	3.36203		44.4244	6.28962		42.211	3.7176
44.4387	4.3641		42.224	3.51252		44.4387	6.11146		42.224	4.48228
44.453	4.08242		42.237	3.58175		44.453	6.3932		42.237	5.15558
44.4673	4.21361		42.25	3.09716		44.4673	6.21918		42.25	5.06901
44.4816	4.21361		42.263	3.14231		44.4816	6.21918		42.263	5.05459
44.4959	4.40654		42.276	3.29581		44.4959	5.84214		42.276	4.57846
44.5102	4.15959		42.289	3.17542		44.5102	6.06588		42.289	4.5977
44.5245	4.21361		42.302	3.47339		44.5245	5.867		42.302	4.98726
44.5388	4.2985		42.315	3.51553		44.5388	6.12803		42.315	4.66022
44.5531	4.30236		42.328	3.55165		44.5531	5.98301		42.328	5.17482
44.5674	4.25606		42.341	3.5065		44.5674	5.81728		42.341	4.9055
44.5817	4.17889		42.354	3.54864		44.5817	5.82971		42.354	4.76603
44.596	4.33709		42.367	3.56369		44.596	6.11974		42.367	4.55442
44.6103	4.38725		42.38	3.4132		44.6103	6.20261		42.38	5.12192
44.6246	4.27149		42.393	3.85264		44.6246	5.90429		42.393	5.69903
44.6389	4.12101		42.406	3.74729		44.6389	6.04102		42.406	4.64579
44.6532	4.1866		42.419	3.35601		44.6532	6.09903		42.419	4.51113
44.6675	4.23291		42.432	3.0791		44.6675	5.97887		42.432	4.92473
44.6818	4.09014		42.445	3.33795		44.6818	5.83385		42.445	4.28029
44.6961	4.03226		42.458	3.41019		44.6961	5.85871		42.458	4.79007
44.7104	4.43355		42.471	3.39815		44.7104	5.94572		42.471	5.29024
44.7247	4.44899		42.484	3.54262		44.7247	6.09488		42.484	4.58808
44.739	3.85476		42.497	4.15362		44.739	6.06174		42.497	4.31395
44.7533	4.29079		42.51	3.90079		44.7533	6.19018		42.51	4.94397
44.7676	4.23676		42.523	3.60282		44.7676	6.09074		42.523	4.92473
44.7819	4.40654		42.536	3.44931		44.7819	5.94987		42.536	5.15558
44.7962	4.4104		42.549	3.68107		44.7962	6.10731		42.549	4.12158
44.8105	4.03226		42.562	3.40718		44.8105	6.09074		42.562	4.93435
44.8248	4.27149		42.575	3.18444		44.8248	5.90429		42.575	5.86736
44.8391	4.24062		42.588	3.74127		44.8391	6.05345		42.588	4.62175
44.8534	4.09785		42.601	3.8707		44.8534	5.97058		42.601	5.30467
44.8677	3.90878		42.614	3.01589		44.8677	6.25647		42.614	4.32838
44.882	3.9821		42.627	3.58777		44.882	6.2689		42.627	5.10268
44.8963	3.94351		42.64	3.92788		44.8963	6.01616		42.64	5.09306
44.9106	4.02068		42.653	3.60583		44.9106	6.21918		42.653	4.85259
44.9249	4.23676		42.666	3.44329		44.9249	6.21918		42.666	5.36719
44.9392	4.11329		42.679	3.93089		44.9392	6.03273		42.679	4.50632
44.9535	4.12872		42.692	3.57573		44.9535	6.06174		42.692	4.36685
44.9678	4.00911		42.705	3.5065		44.9678	6.22333		42.705	4.37647
44.9821	4.00911		42.718	3.37407		44.9821	6.22333		42.718	5.30467
44.9964	4.21361		42.731	3.73224		44.9964	6.14046		42.731	4.92954
45.0107	4.32937		42.744	3.37407		45.0107	6.24819		42.744	5.19406
45.025	4.10557		42.757	3.91283		45.025	6.21918		42.757	4.43418
45.0393	4.25606		42.77	3.91283		45.0393	6.16946		42.77	4.67465
45.0536	3.9821		42.783	3.21454		45.0536	6.17361		42.783	4.86221
45.0679	4.1403		42.796	3.02793		45.0679	6.24819		42.796	5.04978
45.0822	4.21361		42.809	3.84662		45.0822	6.00787		42.809	5.09306
45.0965	4.05541		42.822	3.19046		45.0965	6.07002		42.822	4.66503
45.1108	4.094		42.835	3.16037		45.1108	6.13632		42.835	4.94878
45.1251	3.96666		42.848	3.07308		45.1251	5.82556		42.848	4.81412
45.1394	4.11329		42.861	3.47941		45.1394	5.92501		42.861	4.80931
45.1537	4.21361		42.874	3.34698		45.1537	5.92501		42.874	4.76122
45.168	4.22905		42.887	3.65699		45.168	5.99959		42.887	4.0302
45.1823	3.98595		42.9	2.93463		45.1823	6.04931		42.9	4.53518
45.1966	4.09785		42.913	3.42222		45.1966	5.98716		42.913	4.56885
45.2109	4.09785		42.926	3.82254		45.2109	6.19018		42.926	4.26105
45.2252	4.06699		42.939	4.07236		45.2252	6.21504		42.939	4.53999
45.2395	4.39497		42.952	3.49747		45.2395	6.2399		42.952	4.6987
45.2538	4.16731		42.965	3.51252		45.2538	5.75927		42.965	4.19853
45.2681	4.20204		42.978	3.36203		45.2681	5.77584		42.978	4.51594
45.2824	4.19818		42.991	3.18444		45.2824	5.88771		42.991	4.23219
45.2967	4.02454		43.004	4.04226		45.2967	5.8007		43.004	4.64098
45.311	4.17503		43.017	3.51854		45.311	5.9623		43.017	4.14082
45.3253	3.89721		43.03	3.40116		45.3253	6.01616		43.03	4.56404
45.3396	4.00139		43.043	3.67505		45.3396	6.03273		43.043	4.58327
45.3539	4.10557		43.056	3.60884		45.3539	5.95401		43.056	5.16039
45.3682	3.97824		43.069	3.70515		45.3682	6.09074		43.069	5.17482
45.3825	3.93579		43.082	3.68408		45.3825	6.1446		43.082	4.87664
45.3968	4.22905		43.095	3.33795		45.3968	5.90843		43.095	4.92473
45.4111	4.10171		43.108	3.39213		45.4111	6.16532		43.108	4.87664
45.4254	3.97824		43.121	3.19949		45.4254	5.82971		43.121	4.29952
45.4397	3.92808		43.134	3.42824		45.4397	6.07417		43.134	4.35724
45.454	3.92422		43.147	3.40718		45.454	5.97473		43.147	5.32872
45.4683	3.97824		43.16	3.72923		45.4683	5.78413		43.16	4.73236
45.4826	3.93579		43.173	3.87371		45.4826	5.97473		43.173	4.81412
45.4969	3.93579		43.186	3.55767		45.4969	5.97473		43.186	4.43418
45.5112	3.96666		43.199	3.34397		45.5112	6.06174		43.199	4.84779
45.5255	4.07084		43.212	3.22658		45.5255	6.22333		43.212	4.62656
45.5398	4.25992		43.225	3.1694		45.5398	6.0203		43.225	5.05939
45.5541	4.06699		43.238	3.34397		45.5541	6.1446		43.238	4.67946
45.5684	4.03226		43.251	3.34999		45.5684	6.07417		43.251	4.86221
45.5827	4.20204		43.264	3.15134		45.5827	6.23576		43.264	4.62175
45.597	4.38339		43.277	2.7751		45.597	5.91258		43.277	4.87664
45.6113	4.15573		43.29	3.23862		45.6113	5.81313		43.29	4.90069
45.6256	4.12486		43.303	3.63894		45.6256	5.89186		43.303	3.93883
45.6399	3.93579		43.316	3.41019		45.6399	6.07002		43.316	3.97249
45.6542	4.27535		43.329	3.34397		45.6542	6.10317		43.329	4.01577
45.6685	3.88949		43.342	3.18444		45.6685	5.86285		43.342	4.57365
45.6828	4.14802		43.355	3.82555		45.6828	6.01616		43.355	4.67946
45.6971	4.05541		43.368	4.15362		45.6971	5.97058		43.368	4.70351
45.7114	4.24834		43.381	3.86468		45.7114	6.2109		43.381	4.76603
45.7257	4.41426		43.394	3.79545		45.7257	6.27719		43.394	5.01611
45.74	4.22905		43.407	3.63894		45.74	6.16946		43.407	5.29024
45.7543	4.15959		43.42	3.39213		45.7543	6.19432		43.42	4.61213
45.7686	4.21361		43.433	3.44028		45.7686	6.24404		43.433	4.19372
45.7829	4.2985		43.446	3.22056		45.7829	6.03688		43.446	4.55442
45.7972	4.31008		43.459	3.19949		45.7972	6.12389		43.459	4.71312
45.8115	4.32551		43.472	3.32591		45.8115	6.16946		43.472	4.52075
45.8258	4.17117		43.485	3.33795		45.8258	6.2109		43.485	4.25624
45.8401	4.2522		43.498	3.57874		45.8401	5.94987		43.498	4.43899
45.8544	4.36796		43.511	3.57272		45.8544	6.38906		43.511	4.71793
45.8687	4.5416		43.524	3.46135		45.8687	6.04931		43.524	3.94844
45.883	4.43355		43.537	3.2025		45.883	6.28133		43.537	3.89073
45.8973	4.32937		43.55	2.92861		45.8973	5.896		43.55	4.72274
45.9116	4.32937		43.563	3.25367		45.9116	6.19847		43.563	4.78526
45.9259	4.40269		43.576	3.54864		45.9259	6.07002		43.576	4.8574
45.9402	4.27149		43.589	3.37407		45.9402	6.24404		43.589	4.5448
45.9545	4.27921		43.602	3.48242		45.9545	6.01616		43.602	4.39571
45.9688	4.22519		43.615	3.95196		45.9688	6.18189		43.615	4.34762
45.9831	4.32551		43.628	3.88575		45.9831	6.23161		43.628	4.79007
45.9974	4.14802		43.641	3.31387		45.9974	6.14875		43.641	5.22291
46.0117	4.14802		43.654	3.26872		46.0117	6.14875		43.654	4.4919
46.026	4.32937		43.667	3.76234		46.026	5.74684		43.667	4.69389
46.0403	4.45671		43.68	3.78341		46.0403	6.0866		43.68	4.85259
46.0546	3.88563		43.693	3.1694		46.0546	6.09488		43.693	4.55442
46.0689	3.99753		43.706	3.08512		46.0689	6.07002		43.706	4.27067
46.0832	4.094		43.719	3.45232		46.0832	6.04931		43.719	4.34281
46.0975	4.26763		43.732	3.30785		46.0975	6.15289		43.732	5.67018
46.1118	4.66893		43.745	3.10619		46.1118	6.09488		43.745	5.42971
46.1261	4.32165		43.758	3.06706		46.1261	5.85042		43.758	4.68427
46.1404	4.19432		43.771	3.3229		46.1404	6.04516		43.771	4.7516
46.1547	4.15959		43.784	3.25367		46.1547	6.21918		43.784	4.61213
46.169	4.46056		43.797	2.90754		46.169	6.11146		43.797	4.89107
46.1833	4.24834		43.81	3.27474		46.1833	6.36834		43.81	4.47266
46.1976	4.11715		43.823	3.24464		46.1976	5.89186		43.823	4.20815
46.2119	4.20975		43.836	3.59078		46.2119	6.19432		43.836	4.41014
46.2262	4.17503		43.849	3.8406		46.2262	6.19018		43.849	4.8574
46.2405	4.43741		43.862	3.70214		46.2405	6.16532		43.862	4.9055
46.2548	4.21747		43.875	3.00686		46.2548	5.98716		43.875	5.13634
46.2691	4.34095		43.888	3.46436		46.2691	6.2109		43.888	5.12673
46.2834	4.23676		43.901	3.41019		46.2834	5.85042		43.901	4.4919
46.2977	4.29464		43.914	3.74729		46.2977	6.3352		43.914	4.78526
46.312	4.42584		43.927	3.81351		46.312	6.43878		43.927	4.78526
46.3263	4.36796		43.94	3.64797		46.3263	6.12803		43.94	5.19406
46.3406	4.48372		43.953	2.91657		46.3406	6.23576		43.953	3.88592
46.3549	4.12872		43.966	2.64568		46.3549	5.9623		43.966	4.45342
46.3692	4.31394		43.979	3.47339		46.3692	6.16946		43.979	4.64579
46.3835	4.37953		43.992	3.55466		46.3835	6.23161		43.992	4.52556
46.3978	4.7461		44.005	3.56068		46.3978	6.29791		44.005	4.54961
46.4121	4.36024		44.018	3.39213		46.4121	6.02445		44.018	4.3909
46.4264	4.22519		44.031	3.58777		46.4264	6.42635		44.031	4.55442
46.4407	4.24834		44.044	3.34397		46.4407	6.26476		44.044	4.4438
46.455	4.34866		44.057	3.74729		46.455	6.19847		44.057	5.35276
46.4693	4.47986		44.07	2.5614		46.4693	6.19018		44.07	4.84298
46.4836	4.34095		44.083	3.26872		46.4836	6.40563		44.083	5.51147
46.4979	4.46056		44.096	3.69913		46.4979	6.23161		44.096	4.97283
46.5122	4.40269		44.109	3.60282		46.5122	6.28962		44.109	4.06387
46.5265	4.40269		44.122	3.07007		46.5265	6.28962		44.122	5.37681
46.5408	4.02454		44.135	3.25066		46.5408	6.02445		44.135	3.90035
46.5551	4.64578		44.148	3.48844		46.5551	6.32691		44.148	4.37166
46.5694	4.56861		44.161	3.57874		46.5694	6.20675		44.161	4.00135
46.5837	4.46056		44.174	3.25969		46.5837	6.37249		44.174	4.27067
46.598	4.24834		44.187	3.049		46.598	6.15289		44.187	4.14082
46.6123	4.28693		44.2	3.75331		46.6123	6.19432		44.2	4.63618
46.6266	4.41812		44.213	3.5667		46.6266	6.06588		44.213	4.34762
46.6409	4.57246		44.226	2.82627		46.6409	6.09903		44.226	4.50632
46.6552	4.15959		44.239	3.18444		46.6552	6.33105		44.239	4.21296
46.6695	4.42584		44.252	3.02793		46.6695	6.24819		44.252	5.14596
46.6838	4.4104		44.265	3.71418		46.6838	6.26476		44.265	5.15558
46.6981	4.53774		44.278	3.47038		46.6981	6.42635		44.278	4.67465
46.7124	4.62649		44.291	3.50951		46.7124	6.06588		44.291	5.1652
46.7267	4.55703		44.304	3.05201		46.7267	6.40563		44.304	5.03535
46.741	4.44513		44.317	2.72092		46.741	6.26062		44.317	4.38128
46.7553	4.36024		44.33	3.2928		46.7553	6.23576		44.33	4.4438
46.7696	4.48758		44.343	3.57874		46.7696	6.45536		44.343	4.10715
46.7839	4.54931		44.356	3.58777		46.7839	6.6128		44.356	3.44347
46.7982	4.50301		44.369	3.28678		46.7982	6.5548		44.369	4.0302
46.8125	4.57632		44.382	3.36805		46.8125	6.47607		44.382	4.41976
46.8268	4.37953		44.395	3.28076		46.8268	6.67495		44.395	4.47266
46.8411	4.47214		44.408	3.51252		46.8411	6.7081		44.408	4.47266
46.8554	4.6535		44.421	3.88575		46.8554	6.75368		44.421	4.6987
46.8697	4.80398		44.434	3.27775		46.8697	6.71224		44.434	4.87183
46.884	4.8773		44.447	3.4132		46.884	6.82826		44.447	5.16039
46.8983	5.00849		44.46	3.61185		46.8983	6.69567		44.46	5.38643
46.9126	4.77311		44.473	3.37407		46.9126	7.1763		44.473	4.29471
46.9269	5.0818		44.486	3.39213		46.9269	6.93599		44.486	3.78974
46.9412	5.07023		44.499	2.95569		46.9412	7.03128		44.499	5.20848
46.9555	5.18599		44.512	3.13328		46.9555	7.07272		44.512	5.08825
46.9698	5.28631		44.525	3.13328		46.9698	7.10586		44.525	5.14596
46.9841	5.48696		44.538	2.96472		46.9841	7.081		44.538	4.39571
46.9984	5.61043		44.551	3.12425		46.9984	7.24259		44.551	4.38609
47.0127	5.88054		44.564	3.36203		47.0127	7.48291		44.564	5.21329
47.027	6.03874		44.577	3.39213		47.027	7.49534		44.577	5.02092
47.0413	6.8259		44.59	3.09716		47.0413	7.69836		44.59	5.44895
47.0556	6.98024		44.603	3.10318		47.0556	8.54361		44.603	5.51147
47.0699	6.84133		44.616	3.22959		47.0699	8.76735		44.616	4.66984
47.0842	7.24263		44.629	3.49446		47.0842	8.70934		44.629	4.25143
47.0985	7.60148		44.642	3.86167		47.0985	9.04081		44.642	4.38128
47.1128	7.84072		44.655	3.66		47.1128	9.62503		44.655	4.76122
47.1271	8.17642		44.668	3.50349		47.1271	10.1844		44.668	4.64098
47.1414	8.72434		44.681	3.48242		47.1414	10.1388		44.681	4.36685
47.1557	9.38802		44.694	3.43125		47.1557	10.9177		44.694	4.79488
47.17	10.0363		44.707	3.48242		47.17	11.85		44.707	4.98245
47.1843	10.6999		44.72	3.33795		47.1843	12.9314		44.72	4.88626
47.1986	11.9		44.733	3.54864		47.1986	14.6178		44.733	4.51594
47.2129	12.7334		44.746	3.72321		47.2129	15.0777		44.746	4.0302
47.2272	14.2885		44.759	3.37708		47.2272	17.3234		44.759	4.54961
47.2415	15.7509		44.772	3.53058		47.2415	19.2501		44.772	4.87664
47.2558	18.2127		44.785	3.67204		47.2558	22.1628		44.785	4.56885
47.2701	20.4584		44.798	3.60884		47.2701	25.867		44.798	4.35724
47.2844	24.2051		44.811	3.55767		47.2844	30.7686		44.811	4.29952
47.2987	28.5692		44.824	3.52456		47.2987	36.0887		44.824	4.51594
47.313	32.6053		44.837	3.48242		47.313	41.4543		44.837	4.41495
47.3273	38.9566		44.85	3.49145		47.3273	48.5809		44.85	4.51113
47.3416	45.6436		44.863	3.65399		47.3416	55.637		44.863	4.66984
47.3559	52.5235		44.876	3.28377		47.3559	61.935		44.876	4.5448
47.3702	60.7077		44.889	3.31989		47.3702	65.6515		44.889	4.43418
47.3845	66.8622		44.902	3.73224		47.3845	67.889		44.902	4.32838
47.3988	73.5762		44.915	3.72321		47.3988	68.5726		44.915	4.63618
47.4131	73.4681		44.928	3.42523		47.4131	66.0037		44.928	4.37647
47.4274	67.1439		44.941	3.36805		47.4274	60.9944		44.941	4.22738
47.4417	60.1327		44.954	3.20852		47.4417	55.7075		44.954	4.26105
47.456	52.2882		44.967	3.27775		47.456	50.7147		44.967	4.57365
47.4703	46.8591		44.98	3.39815		47.4703	48.8627		44.98	4.56404
47.4846	44.0924		44.993	3.26872		47.4846	46.9401		44.993	4.85259
47.4989	43.6564		45.006	3.12124		47.4989	45.0922		45.006	4.6506
47.5132	41.6268		45.019	3.09114		47.5132	43.1614		45.019	4.68427
47.5275	41.6461		45.032	3.33494		47.5275	39.5152		45.032	4.87664
47.5418	41.6461		45.045	3.74729		47.5418	39.5152		45.045	5.6798
47.5561	33.0337		45.058	3.39815		47.5561	31.5185		45.058	4.87664
47.5704	28.5499		45.071	3.34096		47.5704	27.0769		45.071	4.19853
47.5847	22.1523		45.084	3.08813		47.5847	22.6476		45.084	4.35724
47.599	17.5258		45.097	3.27474		47.599	18.7197		45.097	3.67912
47.6133	14.7862		45.11	3.30183		47.6133	16.0182		45.11	4.32838
47.6276	12.4826		45.123	3.03094		47.6276	14.7214		45.123	4.21777
47.6419	10.9122		45.136	3.33494		47.6419	12.9397		45.136	4.58327
47.6562	9.30313		45.149	3.21454		47.6562	11.8127		45.149	4.26105
47.6705	8.14941		45.162	3.33795		47.6705	10.6236		45.162	4.87664
47.6848	7.96805		45.175	3.66		47.6848	10.1802		45.175	3.92921
47.6991	7.16546		45.188	2.79316		47.6991	9.78247		45.188	5.01611
47.7134	6.81432		45.201	2.99783		47.7134	9.31427		45.201	5.62689
47.7277	6.62525		45.214	3.84662		47.7277	8.8585		45.214	4.52556
47.742	6.28955		45.227	3.12124		47.742	8.68034		45.227	4.3909
47.7563	6.21238		45.24	3.17843		47.7563	8.237		45.24	4.63137
47.7706	5.82652		45.253	3.00084		47.7706	8.37787		45.253	4.18891
47.7849	5.51783		45.266	3.33494		47.7849	7.90139		45.266	4.338
47.7992	5.39821		45.279	3.48543		47.7992	7.75223		45.279	4.94397
47.8135	5.2593		45.292	3.40417		47.8135	7.50363		45.292	4.52075
47.8278	4.9892		45.305	3.12425		47.8278	7.25088		45.305	4.52075
47.8421	5.30946		45.318	2.70588		47.8421	7.11001		45.318	4.55923
47.8564	4.82328		45.331	4.06935		47.8564	7.01885		45.331	4.87183
47.8707	4.7461		45.344	3.50048		47.8707	7.16801		45.344	4.49671
47.885	5.12039		45.357	3.59379		47.885	7.00228		45.357	4.25143
47.8993	4.85029		45.37	3.35902		47.8993	6.75368		45.37	5.2181
47.9136	4.59948		45.383	3.66301		47.9136	6.69153		45.383	4.82374
47.9279	4.71138		45.396	3.46737		47.9279	6.63766		45.396	5.08344
47.9422	4.64964		45.409	3.60884		47.9422	6.50093		45.409	4.66503
47.9565	4.64964		45.422	3.46135		47.9565	6.90698		45.422	4.66503
47.9708	4.38339		45.435	3.40116		47.9708	6.5838		45.435	4.56885
47.9851	4.45671		45.448	3.64195		47.9851	6.51336		45.448	4.9055
47.9994	4.41812		45.461	3.40417		47.9994	6.37249		45.461	4.05425
48.0137	4.76925		45.474	3.28377		48.0137	6.33934		45.474	3.94363
48.028	4.60719		45.487	3.68709		48.028	6.09074		45.487	3.75607
48.0423	4.39883		45.5	4.07537		48.0423	6.30619		45.5	3.56851
48.0566	4.39883		45.513	3.43727		48.0566	6.30619		45.513	4.01577
48.0709	4.49529		45.526	3.54262		48.0709	6.05759		45.526	4.1312
48.0852	4.34866		45.539	3.57874		48.0852	5.93329		45.539	4.93916
48.0995	4.48372		45.552	3.55466		48.0995	6.00373		45.552	4.38609
48.1138	4.28693		45.565	3.63292		48.1138	6.32277		45.565	4.80931
48.1281	4.24834		45.578	3.31688		48.1281	6.12389		45.578	4.81412
48.1424	4.37568		45.591	3.65399		48.1424	6.04931		45.591	4.25624
48.1567	4.43741		45.604	3.33193		48.1567	5.76756		45.604	4.94397
48.171	4.32937		45.617	3.85565		48.171	5.9623		45.617	4.50632
48.1853	3.85476		45.63	3.14231		48.1853	6.09074		45.63	4.13601
48.1996	4.23676		45.643	3.31688		48.1996	6.02859		45.643	4.28991
48.2139	4.34481		45.656	3.72321		48.2139	5.8007		45.656	5.05459
48.2282	4.22519		45.669	3.34397		48.2282	5.97058		45.669	5.19406
48.2425	4.24062		45.682	3.54563		48.2425	5.87943		45.682	4.9584
48.2568	4.37953		45.695	3.31989		48.2568	5.89186		45.695	5.09787
48.2711	4.21747		45.708	3.61185		48.2711	6.03688		45.708	4.60732
48.2854	4.21361		45.721	3.77438		48.2854	5.92501		45.721	5.04016
48.2997	4.14802		45.734	3.69913		48.2997	6.28133		45.734	5.11711
48.314	3.90878		45.747	3.64797		48.314	6.07002		45.747	5.20848
48.3283	4.16345		45.76	3.43727		48.3283	5.85457		45.76	4.84298
48.3426	4.1866		45.773	3.10017		48.3426	6.12803		45.773	5.10749
48.3569	4.24448		45.786	3.63292		48.3569	5.62668		45.786	5.27581
48.3712	4.10943		45.799	3.34999		48.3712	5.896		45.799	4.79969
48.3855	3.99753		45.812	3.63593		48.3855	5.94158		45.812	4.75641
48.3998	3.99753		45.825	3.54563		48.3998	5.79656		45.825	5.18444
48.4141	4.34866		45.838	3.62088		48.4141	5.62668		45.838	4.56404
48.4284	4.15959		45.851	3.59981		48.4284	5.82971		45.851	4.89588
48.4427	4.19432		45.864	3.36805		48.4427	5.68055		45.864	4.47747
48.457	4.19046		45.877	3.24163		48.457	5.62254		45.877	4.78045
48.4713	3.88949		45.89	3.22056		48.4713	5.5521		45.89	5.44414
48.4856	4.07856		45.903	3.12425		48.4856	5.69712		45.903	4.97283
48.4999	4.01296		45.916	3.49446		48.4999	5.85871		45.916	5.01611
48.5142	4.20975		45.929	3.63894		48.5142	5.81313		45.929	4.81893
48.5285	4.14416		45.942	3.86167		48.5285	5.99959		45.942	4.71793
48.5428	3.95509		45.955	3.37407		48.5428	5.64326		45.955	4.95359
48.5571	3.95509		45.968	3.50951		48.5571	5.64326		45.968	4.84779
[truncated: 2,617 more rows]
